# Supplementary material for: Systems level identification of a matrisome-associated macrophage polarisation state in multi-organ fibrosis
Source: eLife. 2023 Sep 14;12:e85530. doi: 10.7554/eLife.85530 (PMC10547479; doi:10.7554/eLife.85530)
Supplement: Figure 1—source data 1. [file elife-85530-fig1-data1.xlsx]

## Sheet: SuppTable1
Figure 1-source data 1. Marker genes for monocyte/macrophages
Tissue	Monocytes (Classical | non-classical)	Tissue-resident macrophages (TRM)	Reference
Liver	FCN1 | LST1	RNASE1, MARCO, LYVE1	1
Lung	FCN1, IL1B, S100A8, S100A9 | LST1	RNASE1, FABP4	2, 3
Heart	FCN1, S100A8, S100A9 | LST1	RNASE1, LYVE1, C1QB	4, 5
Skin	FCN1, S100A8, S100A9 | LST1	RNASE1, LYVE1, C1QA	6, 7, 8
Kidney	FCN1, S100A8, S100A9 | LST1	RNASE1, LYVE1, C1QC	9, 10
Endometrium	FCN1, S100A8, S100A9 | LST1	RNASE1, LYVE1	11
1	Ramachandran et al. (2019) Nature 10.1038/s41586-019-1631-3
2	Morse et al. (2019) Eur Respir J 10.1183/13993003.02441-2018
3	Adams et al. (2020) Sci Adv 10.1126/sciadv.aba1983
4	Rao et al. (2021) Basic Res Cardiol 10.1007/s00395-021-00897-1
5	Koenig et al. (2022) Nat Cariovasc. Res 10.1038/s44161-022-00028-6
6	Xue et al. (2022) Arthritis Rheumatol 10.1002/art.41813
7	Gur et al. (2022) Cell 10.1016/j.cell.2022.03.011
8	Xu et al. (2021) Cell Rep 10.1016/j.celrep.2021.109524
9	Kuppe et al (2021) Nature 10.1038/s41586-020-2941-1
10	Stewart et al (2019) Science 10.1126/science.aat5031
11	Tan et al. (2022) Nat Cell Biol 10.1038/s41556-022-00961-5
