# Supplementary material for: Systems level identification of a matrisome-associated macrophage polarisation state in multi-organ fibrosis
Source: eLife. 2023 Sep 14;12:e85530. doi: 10.7554/eLife.85530 (PMC10547479; doi:10.7554/eLife.85530)
Supplement: Figure 1—source data 2. [file elife-85530-fig1-data2.xlsx]

## Sheet: SuppTable2
Figure 1-source data 2. Marker genes for TREM2+ macrophages.
The SPP1+MAM+ marker genes reported here were derived using COMET (see Methods and Figure 2-source data 5).
Full list of transcriptional signature genes are in Figure 2-source data 1.
TREM2+ Macrophages	Marker genes	References
Matrisome-associated macrophages (SPP1+MAM+)	CBLB, MITF, RASAL2, GPC4, CD52, RGCC	this study
Scar-associated macrophages (SAM)	CD9, TREM2, SPP1	1, 2
Tumor-associated macrophages (TAM)	A2M ANXA2 APOC1 APOE ASAH1 ATP6V1F BCAP31 C1QA C1QB C1QC CALR CAPG CCL18 CD9 CD59 CD63 CD81 CREG1 CTSA CTSB CTSZ FABP3 FABP5 FAM20C FCGRT FPR3 FTL FUCA1 GM2A GRN GSN HEXB IGSF6 LAMP1 LGALS3 LGMN MGST3 MMP14 NPC2 NPL NR1H3 NUPR1 OTOA PLA2G7 PLD3 PLIN2 PLTP PRDX1 PSAP RNASE1 SDS SPP1 TMEM176A TMEM176E TREM2 TXN VAT1	3
Lipid-associated macrophages (LAM)	APOC1 APOE AQP9 CAPG CCL4 CD9 CD36 CD52 CD109 CSTB CXCL3 CXCL8 CYP27A1 FABP4 FABP5 FBP1 GPNMB IL1B LGALS3 LIPA LPL LSP1 MATK MMP19 PHLDA1 PLA2G7 PLIN2 PPARG RAB7B SDC2 SDS SPP1 TREM2	4, 5
Disease-associated microglia (DAM)	ANK APOC APOE AXL CCL6 CD9 CD63 CLEC7A CSF1 CTS7 CTSB CTSD CTSL CTSZ IGF1 ITGAX LILBR4 LPL SPP1 TIMP2 TREM2 TYROBP	6, 7
1	Ramachandran et al. (2019) Nature 10.1038/s41586-019-1631-3
2	Fabre et al (2022) Sci Immunol 10.1126/sciimmunol.add8945
3	Mulder et al (2021) Immunity 10.1016/j.immuni.2021.07.007
4	Jaitin et al (2019) Cell 10.1016/j.cell.2019.05.054
5	Eraslan et al (2022) Science 10.1126/science.abl4290
6	Karen-Shaul et al (2017) Cell 10.1016/j.cell.2017.05.018
7	Silvin et al (2022) Immunity 10.1016/j.immuni.2022.07.004
