# Supplementary material for: Systems level identification of a matrisome-associated macrophage polarisation state in multi-organ fibrosis
Source: eLife. 2023 Sep 14;12:e85530. doi: 10.7554/eLife.85530 (PMC10547479; doi:10.7554/eLife.85530)
Supplement: Figure 1—source data 3. [file elife-85530-fig1-data3.xlsx]

## Sheet: SuppTable3
Figure 1-source data 3. GSEA analysis of DEG between SPP1+ macrophages and other macrophages in each tissue
Tissue	Pathway	NES	FDR	Core Enrichment
liver	LYSOSOME	2.03832	1.734e-07	ACP5/GM2A/DNASE2/HEXB/CTSD/LAMP1/CTSL/CTSA/LGMN/CTSH/HEXA/GLA/LIPA/ACP2/CD68/ASAH1/GUSB/ATP6AP1/M6PR/CD63/SCARB2/ATP6V1H/FUCA1/GGA2/GLB1/GGA1/CTSB/NEU1/LAMP2/CTSZ/ATP6V0D1/CLTA/DNASE2B/ATP6V0A1/GBA/SMPD1/SLC11A2/NAGPA/AP1S1/CTSC/PPT1/NPC1/NAGLU/GNPTG/CTSW/PSAP/PLA2G15/CTSK/IGF2R/NAGA/ATP6V0B/LAPTM4A/ATP6V0D2/TCIRG1/AP3D1/AP3S1/NPC2/AGA/SLC17A5/GNPTAB/ARSA/AP3B1/GAA/CTNS
liver	METABOLISM OF POLYAMINES	1.9556	1.03056e-06	SMS/PSMB2/PSMD2/OAZ2/PSMD14/PSMA5/PSMC1/PSMB6/PSMD13/PSMB5/PSMD3/PSMD8/PSMB7/NQO1/PSMC4/PSMD6/PSMC3/PSMC5/PSMA3/PSMB1/PSMA7/SRM/PSMD7/PSMD11/PSMA1/PSMD1/PSMD4/PSMD9/PSMB3/PSME3/PSMB4/PSMD10/PSMF1/SMOX/ODC1/PSMC2/PSMB8
liver	DEFECTIVE CFTR CAUSES CYSTIC FIBROSIS	1.93172	2.70727e-06	VCP/PSMB2/PSMD2/PSMD14/PSMA5/DERL2/PSMC1/PSMB6/PSMD13/PSMB5/PSMD3/PSMD8/PSMB7/PSMC4/PSMD6/DERL1/PSMC3/PSMC5/RNF5/PSMA3/PSMB1/PSMA7/PSMD7/PSMD11/PSMA1/PSMD1/PSMD4/PSMD9/PSMB3/PSME3/PSMB4/ERLEC1/OS9/PSMD10/RNF185/PSMF1/PSMC2/PSMB8/UBB/PSMC6/UBC
liver	ABC TRANSPORTER DISORDERS	1.92678	9.27366e-07	VCP/PSMB2/PSMD2/PSMD14/PSMA5/DERL2/PSMC1/PSMB6/PSMD13/PSMB5/PSMD3/PSMD8/PSMB7/PSMC4/PSMD6/DERL1/PSMC3/PSMC5/RNF5/PSMA3/PSMB1/PSMA7/ABCD1/PSMD7/PSMD11/PSMA1/PSMD1/PSMD4/ABCD4/PSMD9/PSMB3/PSME3/PSMB4/ERLEC1/OS9/PSMD10/RNF185/PSMF1/PSMC2/PSMB8/UBB/PSMC6/UBC
liver	HEDGEHOG LIGAND BIOGENESIS	1.91594	4.7819e-06	P4HB/VCP/PSMB2/PSMD2/PSMD14/PSMA5/DERL2/PSMC1/PSMB6/PSMD13/PSMB5/PSMD3/PSMD8/PSMB7/PSMC4/PSMD6/PSMC3/PSMC5/PSMA3/PSMB1/PSMA7/PSMD7/PSMD11/PSMA1/PSMD1/PSMD4/PSMD9/PSMB3/PSME3/PSMB4/ERLEC1/OS9/PSMD10/PSMF1/PSMC2/PSMB8/UBB/PSMC6/UBC
liver	CYSTEINE AND METHIONINE METABOLISM	1.90181	0.000161688	SDS/IL4I1/SMS/AHCY/LDHA/LDHB/DNMT3A/ENOPH1/GOT2/DNMT1/SRM
liver	THE ROLE OF GTSE1 IN G2 M PROGRESSION AFTER G2 CHECKPOINT	1.88581	3.55446e-06	TUBA1C/TUBB4B/TUBB6/TUBA1B/PSMB2/PSMD2/PSMD14/PSMA5/PSMC1/PSMB6/PSMD13/PSMB5/PSMD3/PSMD8/PSMB7/PSMC4/PSMD6/PSMC3/HSP90AB1/PSMC5/PSMA3/PSMB1/PSMA7/PSMD7/PSMD11/PSMA1/PSMD1/PSMD4/PSMD9/PSMB3/PSME3/PSMB4/PSMD10/PSMF1/PSMC2/CCNB1/PSMB8/UBB/PSMC6/UBC/CDK1/MAPRE1
liver	PROTEASOME	1.8791	0.000109074	PSMB2/PSMD2/PSMD14/PSMA5/PSMC1/PSMB6/PSMD13/PSMB5/PSMD3/PSMD8/PSMB7/PSMC4/PSMD6/PSMC3/PSMC5/PSMA3/PSMB1/PSMA7/PSMD7/PSMD11/PSMA1/PSMD1/PSMD4/PSMB3/PSME3/PSMB4
liver	DEGRADATION OF DVL	1.87434	4.28992e-05	PSMB2/PSMD2/PSMD14/PSMA5/PSMC1/PSMB6/PSMD13/PSMB5/PSMD3/PSMD8/PSMB7/PSMC4/PSMD6/PSMC3/PSMC5/PSMA3/PSMB1/PSMA7/PSMD7/PSMD11/PSMA1/PSMD1/PSMD4/PSMD9/PSMB3/PSME3/PSMB4/PSMD10/PSMF1/PSMC2/PSMB8/UBB/PSMC6/UBC/DVL2
liver	ABC FAMILY PROTEINS MEDIATED TRANSPORT	1.86669	9.27884e-07	ABCC5/VCP/PSMB2/PSMD2/PSMD14/PSMA5/DERL2/PSMC1/PSMB6/PSMD13/PSMB5/PSMD3/PSMD8/PSMB7/PSMC4/PSMD6/DERL1/PSMC3/PSMC5/RNF5/PSMA3/PSMB1/PSMA7/ABCD1/PSMD7/PSMD11/PSMA1/PSMD1/EIF2S1/PSMD4/PSMD9/PSMB3/PSME3/PSMB4/ERLEC1/ABCF1/OS9/PSMD10/RNF185/ABCB8/PSMF1/PEX3/PSMC2/PSMB8/ABCC1/UBB/PSMC6/UBC/ABCC10/PEX19
liver	CDT1 ASSOCIATION WITH THE CDC6 ORC ORIGIN COMPLEX	1.85469	4.8614e-05	PSMB2/PSMD2/PSMD14/PSMA5/PSMC1/PSMB6/PSMD13/PSMB5/PSMD3/PSMD8/PSMB7/PSMC4/PSMD6/PSMC3/PSMC5/PSMA3/PSMB1/PSMA7/PSMD7/PSMD11/PSMA1/PSMD1/PSMD4/PSMD9/PSMB3/PSME3/PSMB4/PSMD10/PSMF1/PSMC2/PSMB8/UBB/PSMC6/UBC/GMNN
liver	DEGRADATION OF GLI1 BY THE PROTEASOME	1.85422	4.8614e-05	PSMB2/PSMD2/PSMD14/PSMA5/PSMC1/PSMB6/PSMD13/PSMB5/PSMD3/PSMD8/PSMB7/PSMC4/PSMD6/PSMC3/PSMC5/PRKACB/PSMA3/PSMB1/PSMA7/PSMD7/PSMD11/PSMA1/PSMD1/PSMD4/PSMD9/PSMB3/PSME3/PSMB4/PSMD10/PSMF1/ITCH/PSMC2/PSMB8/UBB/PSMC6/UBC
liver	DEGRADATION OF AXIN	1.85292	6.01983e-05	PSMB2/PSMD2/PSMD14/PSMA5/PSMC1/PSMB6/PSMD13/PSMB5/PSMD3/PSMD8/PSMB7/PSMC4/PSMD6/PSMC3/PSMC5/PSMA3/PSMB1/PSMA7/PSMD7/PSMD11/PSMA1/PSMD1/PSMD4/PSMD9/PSMB3/PSME3/PSMB4/PSMD10/PSMF1/PSMC2/PSMB8/UBB/PSMC6/UBC
liver	NEGATIVE REGULATION OF NOTCH4 SIGNALING	1.85236	6.05622e-05	PSMB2/PSMD2/PSMD14/PSMA5/PSMC1/PSMB6/PSMD13/PSMB5/PSMD3/PSMD8/PSMB7/PSMC4/PSMD6/PSMC3/PSMC5/PSMA3/PSMB1/PSMA7/PSMD7/PSMD11/PSMA1/PSMD1/PSMD4/PSMD9/PSMB3/PSME3/PSMB4/PSMD10/AKT1/PSMF1/PSMC2/PSMB8/UBB/PSMC6/UBC
liver	RESPONSE TO METAL IONS	1.84944	4.8614e-05	MT1G/MT1H/MT1X/MT1M/MT1E/MT1F/MT1A/MT2A
liver	REGULATION OF HMOX1 EXPRESSION AND ACTIVITY	1.84857	4.60062e-05	HM13/PSMB2/PSMD2/PSMD14/PSMA5/PSMC1/PSMB6/PSMD13/PSMB5/PSMD3/PSMD8/PSMB7/PSMC4/PSMD6/PSMC3/CSNK2B/PSMC5/PSMA3/PSMB1/PSMA7/PSMD7/PSMD11/PSMA1/PSMD1/KEAP1/PSMD4/CSNK2A2/PSMD9/PSMB3/PSME3/PSMB4/PSMD10/NFE2L2/PSMF1/PSMC2/PSMB8/HMOX1/UBB/PSMC6/UBC
liver	MHC CLASS II ANTIGEN PRESENTATION	1.84549	9.27366e-07	CTSD/CTSL/TUBA1C/CTSA/LGMN/CTSH/HLA-DQA2/TUBB4B/HLA-DQB2/TUBB6/AP2M1/TUBA1B/RAB7A/CTSB/HLA-DMB/CLTA/OSBPL1A/ARF1/DCTN2/HLA-DQA1/AP1S1/CTSC/HLA-DMA/RILP/CTSK/CAPZB/HLA-DOA/CANX/ACTR10/SEC13/HLA-DQB1/HLA-DRB5/HLA-DPA1/ACTR1A/DYNC1I2/AP2A2/KIF5B/AP2S1/DCTN6/HLA-DRA/CTSV/HLA-DPB1/KLC1/DCTN1/HLA-DRB1/ACTR1B/AP1B1/SEC31A/KIF22
liver	ORC1 REMOVAL FROM CHROMATIN	1.84509	4.39567e-05	PSMB2/PSMD2/PSMD14/PSMA5/PSMC1/PSMB6/PSMD13/PSMB5/PSMD3/PSMD8/PSMB7/PSMC4/PSMD6/PSMC3/MCM3/PSMC5/PSMA3/PSMB1/PSMA7/PSMD7/PSMD11/PSMA1/PSMD1/PSMD4/PSMD9/PSMB3/PSME3/PSMB4/PSMD10/PSMF1/MCM6/PSMC2/PSMB8/UBB/PSMC6/UBC
liver	MITOCHONDRIAL TRANSLATION	1.84221	4.7819e-06	MRPS7/MRPS6/MRPL4/TUFM/MRPL11/MRPL40/MRPL13/MRPS11/MRPL35/MRPS16/MRPL9/CHCHD1/MRPL12/MRPL34/MRPL51/MRPL15/MRPS21/MRPL2/MRPL47/MRPL21/MRPL36/MRPS15/ERAL1/MRPL3/MRPS12/MRPL43/MRPL20/MRPL27/MRPS25/MRPL24/DAP3/MRPL17/MRPS18C/MRPS34/MRPL19/MRPL22/MRPL14/MRPL50/MTRF1L/MRPS23/MRPS35/MRPS18A/MRPS14/MRPS28/MRPL39/MRPL41/MRPL42/MRPS5/MRPS2/TSFM/MRPL49/GADD45GIP1/MRPS36/MRRF/MRPS9/MRPL1/GFM1/AURKAIP1/MRPL32…
liver	PYRUVATE METABOLISM	1.84164	0.00018067	AKR1B1/HAGHL/MDH1/PKM/PCK2/LDHA/LDHB/ALDH3A2/GLO1/MDH2/ACAT2/GRHPR/DLD/PDHA1/PC/ME3/ME2/HAGH/PDHB/ALDH7A1/ACYP2/ACYP1/ACSS1
liver	TRANSFERRIN ENDOCYTOSIS AND RECYCLING	1.83938	0.000698602	ATP6V1F/TFRC/ATP6AP1/ATP6V1H/ATP6V1C1/ATP6V0D1/ATP6V1B2/ATP6V1D/ATP6V1E1/ATP6V1A/ATP6V0A1/ATP6V0B/ATP6V0D2/TCIRG1
liver	ASYMMETRIC LOCALIZATION OF PCP PROTEINS	1.8247	0.000161688	PSMB2/PSMD2/PSMD14/PSMA5/PSMC1/PSMB6/PSMD13/PSMB5/PSMD3/PSMD8/PSMB7/PSMC4/PSMD6/PSMC3/PSMC5/PSMA3/PSMB1/PSMA7/PSMD7/PSMD11/PSMA1/PSMD1/PSMD4/PSMD9/PSMB3/PSME3/PSMB4/PSMD10/PSMF1/PSMC2/PSMB8/UBB/PSMC6/UBC/DVL2
liver	REGULATION OF RAS BY GAPS	1.81913	4.60062e-05	PSMB2/PSMD2/PSMD14/PSMA5/PSMC1/PSMB6/PSMD13/PSMB5/PSMD3/PSMD8/PSMB7/PSMC4/PSMD6/PSMC3/PSMC5/PSMA3/PSMB1/PSMA7/PSMD7/PSMD11/PSMA1/PSMD1/PSMD4/NRAS/PSMD9/PSMB3/PSME3/PSMB4/RASA1/PSMD10/PSMF1/KBTBD7/HRAS/PSMC2/PSMB8/UBB/PSMC6/UBC
liver	AUF1 HNRNP D0 BINDS AND DESTABILIZES MRNA	1.81279	8.90903e-05	HSPB1/PSMB2/PSMD2/PSMD14/PSMA5/PSMC1/PSMB6/PSMD13/PSMB5/PSMD3/PSMD8/PSMB7/PSMC4/PSMD6/HSPA8/PSMC3/PSMC5/PSMA3/PSMB1/PSMA7/PSMD7/PSMD11/PSMA1/PSMD1/PSMD4/PSMD9/PSMB3/PSME3/PSMB4/PSMD10/PSMF1/PSMC2/PSMB8/UBB/PSMC6/UBC
liver	PLASMA LIPOPROTEIN CLEARANCE	1.80629	0.00121859	APOC1/APOE/LIPA/AP2M1/CLTA/SCARB1/SOAT1/NR1H3/HDLBP/NPC1/NR1H2/LSR/NPC2/AP2A2/AP2S1/NCEH1
liver	GLUTATHIONE METABOLISM	1.8052	0.000445472	MGST3/SMS/GSTO1/GCLC/GPX4/GCLM/G6PD/PGD/IDH2/GGCT/IDH1/SRM/GPX3/GSS/GSTM4/GSTZ1/MGST2
liver	SCF SKP2 MEDIATED DEGRADATION OF P27 P21	1.80177	0.000236403	CDK4/PSMB2/PSMD2/PSMD14/PSMA5/PSMC1/PSMB6/PSMD13/PSMB5/PSMD3/PSMD8/PSMB7/PSMC4/PSMD6/PSMC3/PSMC5/PSMA3/PSMB1/PSMA7/PSMD7/PSMD11/PSMA1/PSMD1/PSMD4/PSMD9/PSMB3/PSME3/PSMB4/PSMD10/PSMF1/PSMC2/PSMB8/UBB/PSMC6/UBC
liver	DECTIN 1 MEDIATED NONCANONICAL NF KB SIGNALING	1.79663	0.000215045	PSMB2/PSMD2/PSMD14/PSMA5/PSMC1/PSMB6/PSMD13/PSMB5/PSMD3/PSMD8/PSMB7/PSMC4/PSMD6/PSMC3/PSMC5/PSMA3/PSMB1/PSMA7/PSMD7/PSMD11/PSMA1/PSMD1/PSMD4/PSMD9/PSMB3/PSME3/PSMB4/PSMD10/PSMF1/RELA/PSMC2/PSMB8/UBB/PSMC6/UBC
liver	RUNX1 REGULATES TRANSCRIPTION OF GENES INVOLVED IN DIFFERENTIATION OF HSCS	1.79499	6.51225e-05	PSMB2/PSMD2/PSMD14/PSMA5/PSMC1/PSMB6/PSMD13/PSMB5/PSMD3/PSMD8/PSMB7/PSMC4/PSMD6/PSMC3/PSMC5/PSMA3/PSMB1/PSMA7/PSMD7/PSMD11/PSMA1/PSMD1/PSMD4/PSMD9/PSMB3/PSME3/PSMB4/PSMD10/PSMF1/ITCH/PSMC2/PSMB8/UBB/PSMC6/UBC
liver	AMINO ACIDS REGULATE MTORC1	1.79118	0.000332731	ATP6V1F/RHEB/RRAGD/FNIP2/ATP6V1H/RRAGC/ATP6V1C1/ATP6V0D1/ATP6V1B2/ATP6V1D/ATP6V1E1/ATP6V1A/LAMTOR5/LAMTOR1/MLST8/ATP6V0B/LAMTOR3/ATP6V0D2/LAMTOR2/TCIRG1/SEC13/SESN1/ATP6V1G1/NPRL3
liver	DNA REPLICATION PRE INITIATION	1.78821	5.89114e-05	PSMB2/PSMD2/PSMD14/PSMA5/PSMC1/PSMB6/PSMD13/PSMB5/PSMD3/PSMD8/PSMB7/DBF4/PSMC4/PSMD6/PSMC3/MCM3/PSMC5/PSMA3/PSMB1/PSMA7/PSMD7/PSMD11/PSMA1/PSMD1/RPA3/PSMD4/PSMD9/PSMB3/PSME3/PSMB4/RPA2/PSMD10/PSMF1/MCM6/PSMC2/RPA1/PSMB8/UBB/PSMC6/UBC/GMNN
liver	GAP JUNCTION ASSEMBLY	1.7856	0.0025974	TUBA1C/TUBB4B/TUBB6/TUBA1B
liver	BIOCARTA PROTEASOME PATHWAY	1.78458	0.0026417	PSMB2/PSMA5/PSMB6/PSMB5/PSMB7/RPN1/PSMA3/PSMB1/PSMA7/PSMA1/PSMB3/PSMB4/RPN2
liver	APC C CDH1 MEDIATED DEGRADATION OF CDC20 AND OTHER APC C CDH1 TARGETED PROTEINS IN LATE MITOSIS EARLY G1	1.78193	6.51225e-05	PSMB2/PSMD2/PSMD14/PSMA5/PSMC1/PSMB6/PSMD13/PSMB5/PSMD3/PSMD8/PSMB7/ANAPC11/PSMC4/PSMD6/PSMC3/PSMC5/PSMA3/PSMB1/PSMA7/PSMD7/PSMD11/PSMA1/PSMD1/PSMD4/PSMD9/PSMB3/PSME3/PSMB4/PSMD10/ANAPC15/PSMF1/ANAPC10/CDC16/ANAPC7/PSMC2/PSMB8/UBB/PSMC6/UBC/ANAPC2
liver	OTHER GLYCAN DEGRADATION	1.7733	0.00534718	HEXB/HEXA/FUCA1/GLB1/NEU1/GBA/NEU3/MAN2C1/FUCA2/AGA
liver	TRIGLYCERIDE METABOLISM	1.77033	0.00206465	FABP5/FABP4/MGLL/FABP3/PLIN3/PRKACB/GK/GPD2/PPP1CA/PPP1CC/PNPLA4
liver	CROSS PRESENTATION OF SOLUBLE EXOGENOUS ANTIGENS ENDOSOMES	1.76958	0.000445472	PSMB2/PSMD2/PSMD14/PSMA5/PSMC1/PSMB6/PSMD13/PSMB5/PSMD3/PSMD8/PSMB7/PSMC4/PSMD6/PSMC3/PSMC5/PSMA3/PSMB1/PSMA7/PSMD7/PSMD11/PSMA1/PSMD1/PSMD4/PSMD9/PSMB3/PSME3/PSMB4/PSMD10/PSMF1/PSMC2/PSMB8/PSMC6/MRC2
liver	TRANSPORT OF CONNEXONS TO THE PLASMA MEMBRANE	1.76843	0.00476443	TUBA1C/TUBB4B/TUBB6/TUBA1B
liver	STABILIZATION OF P53	1.76799	0.00058496	PSMB2/PSMD2/PSMD14/PSMA5/PSMC1/PSMB6/PSMD13/PSMB5/PSMD3/PSMD8/PSMB7/PSMC4/PSMD6/PSMC3/PSMC5/PSMA3/PSMB1/PSMA7/PSMD7/PSMD11/PSMA1/PSMD1/PSMD4/PSMD9/PSMB3/PSME3/PSMB4/PSMD10/PSMF1/PSMC2/PSMB8/UBB/PSMC6/UBC
liver	REGULATION OF RUNX3 EXPRESSION AND ACTIVITY	1.76099	0.000450535	PSMB2/PSMD2/PSMD14/PSMA5/PSMC1/PSMB6/PSMD13/PSMB5/PSMD3/PSMD8/PSMB7/PSMC4/PSMD6/PSMC3/PSMC5/PSMA3/PSMB1/PSMA7/PSMD7/PSMD11/PSMA1/PSMD1/PSMD4/PSMD9/PSMB3/PSME3/PSMB4/PSMD10/PSMF1/PSMC2/PSMB8/UBB/PSMC6/UBC
liver	HEDGEHOG ON STATE	1.76066	0.000165505	PSMB2/PSMD2/PSMD14/PSMA5/PSMC1/PSMB6/PSMD13/PSMB5/PSMD3/PSMD8/PSMB7/PSMC4/PSMD6/PSMC3/PSMC5/PSMA3/PSMB1/PSMA7/PSMD7/PSMD11/PSMA1/PSMD1/PSMD4/PSMD9/PSMB3/PSME3/PSMB4/PSMD10/PSMF1/ULK3/ITCH/PSMC2/PSMB8/UBB/PSMC6/UBC/ARRB2/SMURF2
liver	SWITCHING OF ORIGINS TO A POST REPLICATIVE STATE	1.75412	6.01983e-05	PSMB2/PSMD2/PSMD14/PSMA5/PSMC1/PSMB6/PSMD13/PSMB5/PSMD3/PSMD8/PSMB7/ANAPC11/PSMC4/PSMD6/PSMC3/MCM3/PSMC5/PSMA3/PSMB1/PSMA7/PSMD7/PSMD11/PSMA1/PSMD1/PSMD4/PSMD9/PSMB3/PSME3/PSMB4/PSMD10/ANAPC15/PSMF1/ANAPC10/CDC16/ANAPC7/MCM6/PSMC2/PSMB8/UBB/PSMC6/UBC/ANAPC2
liver	GLYCOSPHINGOLIMETABOLISM	1.75208	0.00249889	GM2A/HEXB/CTSA/HEXA/GLA/ASAH1/GLB1/NEU1/GBA/SMPD1/PSAP/NEU3/ARSA/UGCG
liver	INSULIN RECEPTOR RECYCLING	1.7484	0.00349696	ATP6V1F/ATP6AP1/ATP6V1H/ATP6V1C1/ATP6V0D1/ATP6V1B2/ATP6V1D/ATP6V1E1/ATP6V1A/ATP6V0A1/ATP6V0B/ATP6V0D2/TCIRG1
liver	G1 S DNA DAMAGE CHECKPOINTS	1.74661	0.000698602	PSMB2/PSMD2/PSMD14/PSMA5/PSMC1/PSMB6/PSMD13/PSMB5/PSMD3/PSMD8/PSMB7/PSMC4/PSMD6/PSMC3/PSMC5/PSMA3/PSMB1/PSMA7/PSMD7/PSMD11/PSMA1/PSMD1/ZNF385A/PSMD4/PSMD9/PSMB3/PSME3/PSMB4/PSMD10/PSMF1/PSMC2/PSMB8/UBB/PSMC6/UBC
liver	GLUTATHIONE CONJUGATION	1.74316	0.00389006	MGST3/AKR1A1/GSTO1/GCLC/GCLM/GGCT/CNDP2/GSS/GSTM4/GSTZ1/MGST2/ESD
liver	VIBRIO CHOLERAE INFECTION	1.73859	0.000908902	ATP6V1F/PDIA4/ATP6AP1/KDELR2/ATP6V1H/ATP6V1C1/ATP6V0D1/ATP6V1B2/ATP6V1D/ATP6V1E1/ATP6V1A/ARF1/ATP6V0A1/ADCY3/PRKACB/SEC61B/SEC61G/ATP6V0B/GNAS/ATP6V0D2/TCIRG1/ACTG1/KDELR1/ATP6V1G1
liver	FORMATION OF TUBULIN FOLDING INTERMEDIATES BY CCT TRIC	1.73373	0.00443648	TUBA1C/TUBB4B/TUBB6/TUBA1B/CCT7/CCT3/CCT4/CCT5/TCP1/CCT2/CCT6A
liver	REGULATION OF PTEN STABILITY AND ACTIVITY	1.73319	0.000698602	PSMB2/PSMD2/PSMD14/PSMA5/PSMC1/PSMB6/PSMD13/PSMB5/PSMD3/PSMD8/PSMB7/PSMC4/PSMD6/PSMC3/CSNK2B/PSMC5/PSMA3/PSMB1/PSMA7/PSMD7/PSMD11/PSMA1/PSMD1/PSMD4/CSNK2A2/PSMD9/PSMB3/PSME3/PSMB4/PSMD10/AKT1/PSMF1/PSMC2/PSMB8/UBB/PSMC6/UBC/TRIM27
liver	MAPK6 MAPK4 SIGNALING	1.72538	0.000290788	HSPB1/JUN/PSMB2/PSMD2/PSMD14/PSMA5/PSMC1/PSMB6/PSMD13/PSMB5/PSMD3/PSMD8/PSMB7/PSMC4/PSMD6/PSMC3/PSMC5/PRKACB/PSMA3/PSMB1/PSMA7/PSMD7/PSMD11/PSMA1/PSMD1/PSMD4/MAPKAPK5/PSMD9/PSMB3/PSME3/PAK1/PSMB4/PSMD10/PSMF1/XPO1/MAPK6/PSMC2/PSMB8/UBB/PSMC6/UBC/MMP2/CDK1/TNRC6C
liver	APC C MEDIATED DEGRADATION OF CELL CYCLE PROTEINS	1.72499	0.000215045	PSMB2/PSMD2/PSMD14/PSMA5/PSMC1/PSMB6/PSMD13/PSMB5/PSMD3/PSMD8/PSMB7/ANAPC11/PSMC4/PSMD6/PSMC3/PSMC5/PSMA3/PSMB1/PSMA7/PSMD7/PSMD11/PSMA1/PSMD1/PSMD4/PSMD9/PSMB3/PSME3/PSMB4/PSMD10/ANAPC15/PSMF1/ANAPC10/CDC16/ANAPC7/PSMC2/CCNB1/PSMB8/UBB/PSMC6/UBC/ANAPC2/CDK1
liver	GAP JUNCTION TRAFFICKING AND REGULATION	1.72131	0.00534718	TUBA1C/TUBB4B/TUBB6/AP2M1/TUBA1B/DAB2/CLTA
liver	BIOSYNTHESIS OF THE N GLYCAN PRECURSOR DOLICHOL LILINKED OLIGOSACCHARIDE LLO AND TRANSFER TO A NASCENT PROTEIN	1.71514	0.000751642	NPL/AMDHD2/CTSA/RENBP/SRD5A3/FUOM/GLB1/NAGK/NANS/NEU1/GMPPB/ST3GAL6/NUDT14/GMPPA/MPDU1/DPM3/ALG5/MVD/NEU3/DPM2/ALG2/SLC17A5/DPM1/UAP1/GFPT1/ALG1/DPAGT1/ALG14/MPI/DHDDS/NANP/ALG3/ALG9/SLC35A1/ST6GALNAC6/ST3GAL2/NUS1/DOLK/RFT1/PGM3/GNPNAT1/ST3GAL5/PMM1
liver	HEDGEHOG OFF STATE	1.71318	0.000161688	TUBA1C/TUBB4B/TUBB6/TUBA1B/PSMB2/PSMD2/PSMD14/PSMA5/PSMC1/PSMB6/PSMD13/PSMB5/PSMD3/PSMD8/PSMB7/PSMC4/PSMD6/ADCY3/PSMC3/PSMC5/PRKACB/PSMA3/PSMB1/PSMA7/PSMD7/PSMD11/PSMA1/PSMD1/GNAS/PSMD4/PSMD9/PSMB3/PSME3/PSMB4/PSMD10/PSMF1/ITCH/PSMC2/FUZ/PSMB8/UBB/PSMC6/UBC
liver	CELLULAR RESPONSE TO HYPOXIA	1.71303	0.000575166	PSMB2/PSMD2/PSMD14/PSMA5/PSMC1/PSMB6/PSMD13/PSMB5/PSMD3/PSMD8/PSMB7/PSMC4/PSMD6/PSMC3/PSMC5/PSMA3/PSMB1/PSMA7/PSMD7/PSMD11/PSMA1/PSMD1/PSMD4/PSMD9/PSMB3/PSME3/EGLN2/PSMB4/PSMD10/PSMF1/PSMC2/PSMB8/UBB/PSMC6/UBC/HIGD1A/UBE2D2
liver	AMINO SUGAR AND NUCLEOTIDE SUGAR METABOLISM	1.71201	0.00330142	NPL/HEXB/AMDHD2/HEXA/RENBP/GNPDA1/NAGK/NANS/GMPPB/GMPPA/GALE/GALK1/UXS1/HK1/UAP1/GFPT1/PGM2/CHIT1/MPI/GPI/NANP/GALT/CYB5R3
liver	AUTOPHAGY	1.70925	4.39567e-05	PLIN2/TUBA1C/VDAC1/SQSTM1/RHEB/RRAGD/TUBB4B/TUBB6/VCP/TUBA1B/RRAGC/RNASE1/ATG4C/MAP1LC3B/LAMP2/PLIN3/WIPI2/HSPA8/PARK7/CSNK2B/HSP90AB1/LAMTOR5/VIM/ATG7/MTMR14/LAMTOR1/CHMP2A/MLST8/CHMP4A/CHMP2B/CHMP3/LAMTOR3/CSNK2A2/LAMTOR2/WIPI1/HSF1/PINK1/ATG5/CHMP4B/ATG12/DYNC1I2/VPS28/MVB12A/TOMM40/ATG10/TOMM5
liver	POST CHAPERONIN TUBULIN FOLDING PATHWAY	1.70759	0.0137122	TUBA1C/TUBB4B/TUBB6/TUBA1B/ARL2/TBCB
liver	SYNTHESIS OF SUBSTRATES IN N GLYCAN BIOSYTHESIS	1.70308	0.00158931	NPL/AMDHD2/CTSA/RENBP/SRD5A3/FUOM/GLB1/NAGK/NANS/NEU1/GMPPB/ST3GAL6/NUDT14/GMPPA/DPM3/ALG5/MVD/NEU3/DPM2/SLC17A5/DPM1/UAP1/GFPT1
liver	TRIGLYCERIDE CATABOLISM	1.69869	0.0144596	FABP5/FABP4/MGLL/FABP3/PLIN3/PRKACB/GPD2/PPP1CA/PPP1CC/PNPLA4
liver	VALINE LEUCINE AND ISOLEUCINE DEGRADATION	1.69807	0.00510116	IL4I1/BCAT1/ACAA2/HMGCL/ALDH3A2/HADHA/HADHB/ECHS1/ACAT2/ACADM/DLD/ACADS/HSD17B10/HADH/ALDH7A1/PCCB/HMGCS1/HIBCH/HIBADH/MCEE
liver	SIGNALING BY NOTCH4	1.69805	0.000595073	PSMB2/PSMD2/PSMD14/PSMA5/PSMC1/PSMB6/PSMD13/HES1/PSMB5/PSMD3/PSMD8/APH1A/PSMB7/PSMC4/PSMD6/PSEN2/PSMC3/PSMC5/PSMA3/PSMB1/PSMA7/PSMD7/PSMD11/PSMA1/PSMD1/PSMD4/PSMD9/PSMB3/PSME3/PSMB4/PSMD10/AKT1/PSMF1/PSENEN/PSMC2/PSMB8/APH1B/UBB/PSMC6/UBC
liver	PHENYLALANINE METABOLISM	1.6975	0.0148119	IL4I1/PRDX6/GOT2/ALDH3B1/MIF
liver	PHENYLALANINE AND TYROSINE METABOLISM	1.69729	0.00738756	IL4I1/FAH/PCBD1/ASRGL1/GSTZ1
liver	SYNTHESIS OF BILE ACIDS AND BILE SALTS VIA 24 HYDROXYCHOLESTEROL	1.69622	0.0148119	CYP27A1/HSD3B7
liver	REGULATION OF RUNX2 EXPRESSION AND ACTIVITY	1.69154	0.00108145	PSMB2/PSMD2/PSMD14/PSMA5/PSMC1/PSMB6/PSMD13/PSMB5/PSMD3/PSMD8/PSMB7/PSMC4/PSMD6/PSMC3/PSMC5/PSMA3/PSMB1/PSMA7/PSMD7/PSMD11/PSMA1/PSMD1/PSMD4/PSMD9/PSMB3/PSME3/PSMB4/PSMD10/PSMF1/STAT1/PSMC2/PSMB8/UBB/PSMC6/UBC
liver	GLYCOLYSIS GLUCONEOGENESIS	1.69086	0.00265972	FBP1/GALM/AKR1A1/PKM/PCK2/ENO1/LDHA/LDHB/ADH5/ALDH3A2/ALDH3B1/PFKP/DLD/PDHA1/PFKL/HK1/PGM2/PDHB/ALDH7A1/ALDOA/GPI/PGAM1/ACSS1
liver	GLYOXYLATE AND DICARBOXYLATE METABOLISM	1.69073	0.0162954	MDH1/MTHFD2/ACO2/MDH2/GRHPR/HYI/GLYCTK/PGP/MTHFD1
liver	SIGNALING BY HEDGEHOG	1.68736	7.84185e-05	TUBA1C/P4HB/TUBB4B/TUBB6/VCP/TUBA1B/PSMB2/PSMD2/PSMD14/PSMA5/DERL2/PSMC1/PSMB6/PSMD13/PSMB5/PSMD3/PSMD8/PSMB7/PSMC4/PSMD6/ADCY3/PSMC3/PSMC5/PRKACB/PSMA3/PSMB1/PSMA7/PSMD7/PSMD11/PSMA1/PSMD1/GNAS/PSMD4/PSMD9/PSMB3/PSME3/PSMB4/ERLEC1/OS9/PSMD10/PSMF1/ULK3/ITCH/PSMC2/FUZ/PSMB8/UBB/PSMC6/UBC/ARRB2/SMURF2/IFT88/GSK3B
liver	COOPERATION OF PREFOLDIN AND TRIC CCT IN ACTIN AND TUBULIN FOLDING	1.68728	0.00547153	TUBA1C/TUBB4B/TUBB6/TUBA1B/CCT7/CCT3/CCT4/CCT5/TCP1/CCT2/CCT6A/PFDN2/VBP1/PFDN6
liver	CHAPERONE MEDIATED AUTOPHAGY	1.68572	0.0112753	PLIN2/RNASE1/LAMP2/PLIN3/HSPA8/PARK7/HSP90AB1/VIM
liver	PRIMARY BILE ACID BIOSYNTHESIS	1.67874	0.0256881	CYP27A1/HSD3B7/HSD17B4
liver	PCP CE PATHWAY	1.67662	0.00094168	AP2M1/PSMB2/PSMD2/PSMD14/PSMA5/PSMC1/PSMB6/PSMD13/CLTA/PSMB5/PSMD3/PSMD8/PSMB7/PSMC4/PSMD6/PSMC3/PSMC5/PSMA3/PSMB1/PSMA7/PSMD7/PSMD11/PSMA1/PSMD1/PSMD4/PSMD9/PSMB3/PSME3/PSMB4/PSMD10/AP2A2/RYK/PSMF1/AP2S1/PSMC2/PSMB8/UBB/PSMC6/UBC/DVL2/ARRB2/SMURF2/CLTB
liver	MRNA SPLICING MINOR PATHWAY	1.66867	0.00422405	SNRNP25/SNRPB/SNRNP40/POLR2H/POLR2E/ZCRB1/YBX1/POLR2K/SNRPD3/POLR2G/POLR2J/SNRNP48/LSM2/GTF2F2/SNRPE/SF3B5/ZRSR2/SNRPF/POLR2I/ZMAT5/POLR2F/POLR2C/NCBP2/DDX23/TXNL4A/SNRPD2/SRSF2/SF3B2/SF3B3/PRPF6/GTF2F1/EFTUD2/DDX42/SRSF7/SNRPG/PDCD7/SF3B4
liver	UCH PROTEINASES	1.66721	0.00133749	PSMB2/PSMD2/PSMD14/PSMA5/TFPT/PSMC1/PSMB6/PSMD13/PSMB5/PSMD3/PSMD8/ADRM1/PSMB7/PSMC4/PSMD6/PSMC3/PSMC5/UCHL1/PSMA3/PSMB1/PSMA7/PSMD7/PSMD11/UCHL5/PSMA1/PSMD1/PSMD4/PSMD9/PSMB3/PSME3/PSMB4/TGFBR1/PSMD10/UCHL3/PSMF1/MCRS1/PSMC2/ACTR5/PSMB8/UBB/PSMC6/UBC
liver	GLYCEROLIMETABOLISM	1.66646	0.00769591	MGLL/LPL/AKR1A1/GLA/AKR1B1/ALDH3A2/GLYCTK/DGKH/AGPAT2/GK
liver	SPHINGOLIMETABOLISM	1.66549	0.00133382	GM2A/HEXB/CTSA/HEXA/GLA/ASAH1/SPHK1/GLB1/NEU1/DEGS1/GBA/SMPD1/KDSR/ALDH3A2/ALDH3B1/PSAP/NEU3/SPTSSA/CERS2/SGPL1/ORMDL2
liver	MITOCHONDRIAL FATTY ACID BETA OXIDATION	1.66501	0.0139627	DBI/ACADVL/ACAA2/ACOT13/ACBD6/ACOT2/NDUFAB1/HADHA/ACOT9/HADHB/ECHS1/ACADM/ACADS/HADH/PCCB/ECI1/ACOT7/MCEE/ACSF2/PCTP/ACOT11/MECR/DECR1/PCCA
liver	CYCLIN A CDK2 ASSOCIATED EVENTS AT S PHASE ENTRY	1.66203	0.00113787	CDK4/PSMB2/PSMD2/PSMD14/PSMA5/PSMC1/PSMB6/PSMD13/PSMB5/PSMD3/PSMD8/PSMB7/PSMC4/PSMD6/PSMC3/PSMC5/PSMA3/PSMB1/PSMA7/PSMD7/PSMD11/PSMA1/PSMD1/PSMD4/PSMD9/PSMB3/PSME3/PSMB4/CDC25B/PSMD10/AKT1/PSMF1/E2F4/PSMC2/PSMB8/UBB/PSMC6/UBC
liver	DOWNSTREAM SIGNALING EVENTS OF B CELL RECEPTOR BCR	1.66027	0.00174001	RASGRP3/PSMB2/PSMD2/PSMD14/PSMA5/PSMC1/PSMB6/PSMD13/PSMB5/PSMD3/PSMD8/PSMB7/PSMC4/PSMD6/PSMC3/PSMC5/PSMA3/PSMB1/PSMA7/PSMD7/PSMD11/PSMA1/PSMD1/PSMD4/NRAS/PSMD9/PSMB3/PSME3/PSMB4/PSMD10/PSMF1/NFKBIE/HRAS/RELA/PSMC2/PSMB8/IKBKG/UBB/NFATC1/PSMC6/UBC
liver	MTORC1 MEDIATED SIGNALLING	1.65891	0.0207805	RHEB/RRAGD/RRAGC/LAMTOR5/EIF4EBP1/LAMTOR1/EIF4E/MLST8/AKT1S1/LAMTOR3/LAMTOR2
liver	SYNTHESIS OF DNA	1.65792	0.000236403	PSMB2/PSMD2/PSMD14/PSMA5/PSMC1/PSMB6/PSMD13/PSMB5/PSMD3/PSMD8/PSMB7/ANAPC11/PSMC4/PSMD6/PSMC3/MCM3/PSMC5/PSMA3/PSMB1/PSMA7/PSMD7/PSMD11/PSMA1/PSMD1/PCNA/RPA3/PSMD4/PSMD9/PSMB3/PSME3/PSMB4/RPA2/PSMD10/ANAPC15/RFC2/PSMF1/ANAPC10/CDC16/LIG1/ANAPC7/MCM6/PSMC2/RPA1/PSMB8/UBB/PSMC6/UBC/ANAPC2
liver	LDL CLEARANCE	1.65555	0.027443	LIPA/AP2M1/CLTA/SOAT1/NPC1/LSR/NPC2/AP2A2/AP2S1/NCEH1
liver	REGULATION OF MRNA STABILITY BY PROTEINS THAT BIND AU RICH ELEMENTS	1.65103	0.00170975	HSPB1/PSMB2/PSMD2/PSMD14/PSMA5/PSMC1/PSMB6/PSMD13/PSMB5/PSMD3/PSMD8/PSMB7/PSMC4/PSMD6/HSPA8/PSMC3/PSMC5/PSMA3/PSMB1/PSMA7/PSMD7/PSMD11/PSMA1/PSMD1/KHSRP/PSMD4/PSMD9/PSMB3/PSME3/TNPO1/PSMB4/PSMD10/AKT1/EXOSC8/PSMF1/EXOSC7/EXOSC5/XPO1/PSMC2/EXOSC1/PSMB8/UBB/PSMC6/UBC
liver	DISEASES ASSOCIATED WITH GLYCOSYLATION PRECURSOR BIOSYNTHESIS	1.6462	0.027443	CTSA/SRD5A3/GLB1/NEU1/GALE/DPM3/DPM2/GALK1/DPM1/GFPT1/MPI/DHDDS/GALT/NUS1/DOLK
liver	ACTIVATION OF AMPK DOWNSTREAM OF NMDARS	1.64215	0.0215352	TUBA1C/TUBB4B/TUBB6/TUBA1B
liver	G2 M CHECKPOINTS	1.6402	0.000445472	PSMB2/PSMD2/PSMD14/PSMA5/PSMC1/PSMB6/PSMD13/PSMB5/PSMD3/PSMD8/PSMB7/DBF4/PSMC4/PSMD6/PSMC3/MCM3/PSMC5/PSMA3/PSMB1/RHNO1/PSMA7/KAT5/PSMD7/PSMD11/PSMA1/PSMD1/RPA3/PSMD4/PSMD9/PSMB3/PSME3/PSMB4/UBE2V2/RPA2/PSMD10/RFC2/PSMF1/BABAM1/MCM6/PSMC2/UBE2N/RPA1/CCNB1/PSMB8/YWHAH/UBB/HUS1/PSMC6/UBC/CDK1/YWHAQ/RAD1/BRCC3/YWHAG
liver	DNA REPLICATION	1.63764	0.000434737	PSMB2/PSMD2/PSMD14/PSMA5/PSMC1/PSMB6/PSMD13/PSMB5/PSMD3/PSMD8/PSMB7/ANAPC11/DBF4/PSMC4/PSMD6/PSMC3/MCM3/PSMC5/PSMA3/PSMB1/PSMA7/PSMD7/PSMD11/PSMA1/PSMD1/PCNA/RPA3/PSMD4/PSMD9/PSMB3/PSME3/PSMB4/RPA2/PSMD10/ANAPC15/RFC2/PSMF1/ANAPC10/CDC16/LIG1/ANAPC7/MCM6/PSMC2/RPA1/PSMB8/UBB/PSMC6/UBC/ANAPC2/GMNN/RFC1
liver	PPAR SIGNALING PATHWAY	1.63597	0.00844152	FABP5/CYP27A1/FABP4/LPL/DBI/FABP3/OLR1/PPARG/PCK2/SLC27A1/NR1H3/CD36/ACADM/ILK/SLC27A5/GK/RXRB/ACSL4/SCP2/PDPK1
liver	ASPARAGINE N LINKED GLYCOSYLATION	1.63575	9.27366e-07	NPL/CALR/AMDHD2/TUBA1C/CTSA/RENBP/TUBB4B/MGAT1/TMED9/RAB1A/PDIA3/TUBB6/TMED10/KDELR2/TMED2/MGAT4A/SRD5A3/FUCA1/VCP/TUBA1B/FUOM/COPZ1/GLB1/NAGK/NANS/NEU1/CTSZ/DERL2/PSMC1/CD59/NAPA/SEC22C/ARF1/GMPPB/DAD1/ST3GAL6/NUDT14/RPN1/GMPPA/DCTN2/DDOST/DERL1/MPDU1/MCFD2/LMAN2/DPM3/COPE/RNF5/CTSC/ALG5/MLEC/MVD/BET1/LMAN1/TRAPPC2L/NEU3/TMED3/CAPZB/MGAT4B/DPM2/COPB1/ALG2/ARFGAP1/COG4/ARF4/YKT6/TRAPPC6A/TRAPPC4/…
liver	COPI DEPENDENT GOLGI TO ER RETROGRADE TRAFFIC	1.63456	0.00133732	TUBA1C/TUBB4B/TMED9/RAB1A/TUBB6/TMED10/KDELR2/TMED2/TUBA1B/COPZ1/NAPA/ARF1/SURF4/COPE/TMED3/COPB1/ARFGAP1/ARF4/ARFGAP3/KIF5B/KDELR1/KLC1/KIF22/ARF3/STX18/USE1
liver	SELECTIVE AUTOPHAGY	1.62867	0.00534718	PLIN2/TUBA1C/VDAC1/SQSTM1/TUBB4B/TUBB6/VCP/TUBA1B/MAP1LC3B/PLIN3/HSPA8/PARK7/CSNK2B/VIM/CSNK2A2/HSF1/PINK1/ATG5/ATG12/DYNC1I2/TOMM40/TOMM5/UBE2N/PRKAG1/UBB/UBC/PEX5/IFT88
liver	GLUCONEOGENESIS	1.6265	0.0196332	FBP1/MDH1/PCK2/ENO1/SLC25A1/GOT2/SLC37A2/MDH2/SLC25A11/SLC25A13/PC/SLC37A4/ALDOA/GPI/PGAM1/TPI1/G6PC3
liver	FATTY ACID METABOLISM	1.62593	0.0189904	ACADVL/ACAA2/ADH5/ALDH3A2/HADHA/HADHB/ECHS1/ACAT2/ACADM/ACADS/HADH/ACSL4/ALDH7A1/ECI2/ECI1/CPT2
liver	OXIDATIVE PHOSPHORYLATION	1.62451	0.00133732	ATP6V1F/ATP6AP1/ATP6V1H/ATP6V1C1/COX5A/NDUFA8/NDUFB9/ATP6V0D1/ATP6V1B2/ATP6V1D/ATP6V1E1/SDHC/UQCRC2/ATP6V1A/ATP6V0A1/SDHD/SDHA/NDUFV1/NDUFA6/NDUFB4/NDUFAB1/NDUFS8/NDUFB3/NDUFB6/NDUFS3/CYC1/NDUFS2/NDUFC1/ATP6V0B/ATP6V0D2/TCIRG1/NDUFB2/SDHB/NDUFB10/UQCRFS1/NDUFS1/NDUFC2/NDUFS5/ATP6V1G1/NDUFA4/COX7B/NDUFB7/NDUFA5/NDUFS6/UQCR10/NDUFA1/COX6A1/COX6C/NDUFV2/PPA2/COX15/UQCRC1/NDUFA9/NDUFS7/COX8A/ATP6V0E1
liver	THE CITRIC ACID TCA CYCLE AND RESPIRATORY ELECTRON TRANSPORT	1.62261	0.000161688	VDAC1/COX20/UCP2/COX5A/NDUFA8/NDUFB9/SLC16A3/LDHA/BSG/SDHC/UQCRC2/LDHB/IDH2/SDHD/SDHA/NDUFV1/NDUFA6/FAHD1/TRAP1/SUCLG1/NDUFB4/ACO2/NDUFAB1/TMEM126B/NDUFS8/GLO1/MDH2/NDUFB3/NDUFB6/NDUFS3/CYC1/NDUFS2/NDUFAF2/NDUFC1/GSTZ1/DLD/CYCS/PDHA1/NDUFAF3/NDUFB2/SDHB/MPC1/NDUFB10/UQCRFS1/NDUFAF6/NDUFAF1/NDUFS1/NDUFC2/TACO1/ME3/SCO1/NDUFS5/NDUFA4/ME2/FH/HAGH/COX7B/PDHB/NDUFB7/TMEM186/NDUFA5/SLC16A1/NDUFS6/UQCR1…
liver	PLASMA LIPOPROTEIN ASSEMBLY	1.61989	0.0462801	APOC1/APOC2/A2M/APOE/P4HB/PRKACB
liver	DISORDERS OF TRANSMEMBRANE TRANSPORTERS	1.61956	0.000161688	SLC3A2/SLC1A3/VCP/PSMB2/PSMD2/PSMD14/PSMA5/SLC29A3/DERL2/PSMC1/PSMB6/PSMD13/PSMB5/BSG/PSMD3/PSMD8/PSMB7/PSMC4/PSMD6/SLC11A2/DERL1/PSMC3/PSMC5/RNF5/PSMA3/PSMB1/PSMA7/ABCD1/PSMD7/PSMD11/PSMA1/PSMD1/SLC35A2/SLC33A1/PSMD4/ABCD4/PSMD9/PSMB3/PSME3/SEC13/PSMB4/ERLEC1/OS9/SLC17A5/PSMD10/HK1/SLC22A18/RNF185/NUP85/PSMF1/NUP160/PSMC2/SLC16A1/PSMB8/UBB/PSMC6/UBC/SLC20A2/NUP155/RANBP2/NUP93/SLC35A1/NUP188/SEH…
liver	CITRATE CYCLE TCA CYCLE	1.61926	0.0203671	MDH1/PCK2/SDHC/IDH2/SDHD/SDHA/IDH1/SUCLG1/ACO2/MDH2/DLD/PDHA1/SDHB/PC/FH/PDHB/IDH3B
liver	SPHINGOLIMETABOLISM	1.61912	0.0294157	GLA/ASAH1/SPHK1/GLB1/NEU1/DEGS1/GBA/SMPD1/KDSR/NEU3/SGPL1/ARSA/UGCG
liver	MITOCHONDRIAL PROTEIN IMPORT	1.61428	0.00867394	VDAC1/CHCHD10/TIMM8B/TIMM17A/ACO2/HSPD1/CYC1/TIMM13/MTX2/TIMM50/MTX1/COA4/GRPEL1/PMPCB/SLC25A13/TIMM8A/TIMM10B/PMPCA/TOMM40/TOMM5/TIMM44/COA6/GFER/HSPA9/DNAJC19/CHCHD4/TIMM21/CHCHD3/CHCHD2/TIMM10/SAMM50
liver	FORMATION OF TC NER PRE INCISION COMPLEX	1.61174	0.00980702	HMGN1/COPS7A/POLR2H/POLR2E/COPS2/POLR2K/POLR2G/POLR2J/DDB1/PPIE/CUL4A/GTF2H5/GPS1/COPS3/POLR2I/COPS8/GTF2H3/POLR2F/POLR2C/GTF2H1/UBB/COPS6/UBC/CUL4B/ISY1/COPS5/GTF2H2
liver	STEROID BIOSYNTHESIS	1.60711	0.0499614	LIPA/SOAT1/EBP/SQLE/NSDHL/FDFT1/MSMO1/SC5D/HSD17B7/LSS/DHCR24
liver	TYROSINE METABOLISM	1.60525	0.0259317	IL4I1/FAH/ADH5/GOT2/ALDH3B1/GSTZ1/LCMT1/MIF
liver	PENTOSE PHOSPHATE PATHWAY	1.60369	0.047008	FBP1/TALDO1/G6PD/PGD/DERA/PRPS2/PFKP/RPE/PFKL/PGM2/PRPS1/ALDOA/GPI
liver	RESPIRATORY ELECTRON TRANSPORT	1.60191	0.00233255	COX20/COX5A/NDUFA8/NDUFB9/SDHC/UQCRC2/SDHD/SDHA/NDUFV1/NDUFA6/TRAP1/NDUFB4/NDUFAB1/TMEM126B/NDUFS8/NDUFB3/NDUFB6/NDUFS3/CYC1/NDUFS2/NDUFAF2/NDUFC1/CYCS/NDUFAF3/NDUFB2/SDHB/NDUFB10/UQCRFS1/NDUFAF6/NDUFAF1/NDUFS1/NDUFC2/TACO1/SCO1/NDUFS5/NDUFA4/COX7B/NDUFB7/TMEM186/NDUFA5/NDUFS6/UQCR10/COX14/NDUFA1/COX6A1/COQ10A/ETFB/COX6C/NDUFV2/TIMMDC1/ETFA/UQCRC1/ECSIT/NDUFA9/NDUFS7/COX8A/COX5B/NDUFA12/NDUFV3/ND…
liver	SEALING OF THE NUCLEAR ENVELOPE NE BY ESCRT III	1.59769	0.049969	TUBA1C/TUBB4B/TUBB6/TUBA1B/CHMP2A/CHMP4A/CHMP2B/CHMP3/CHMP4B
liver	FGFR2 MUTANT RECEPTOR ACTIVATION	1.59744	0.0481318	POLR2H/POLR2E/POLR2K/POLR2G/POLR2J/GTF2F2/POLR2I/POLR2F/POLR2C/NCBP2
liver	IRON UPTAKE AND TRANSPORT	1.59636	0.0167366	ATP6V1F/TFRC/ATP6AP1/ATP6V1H/ATP6V1C1/ATP6V0D1/ATP6V1B2/ATP6V1D/ATP6V1E1/ATP6V1A/ATP6V0A1/HMOX2/GLRX3/SLC11A2/ATP6V0B/ATP6V0D2/TCIRG1/CYBRD1/ATP6V1G1/HMOX1/FTH1/UBB/UBC
liver	COPI MEDIATED ANTEROGRADE TRANSPORT	1.59346	0.00386404	TUBA1C/TUBB4B/TMED9/RAB1A/TUBB6/TMED10/KDELR2/TMED2/TUBA1B/COPZ1/CD59/NAPA/ARF1/DCTN2/COPE/BET1/TMED3/CAPZB/COPB1/ARFGAP1/COG4/ARF4/YKT6/ARFGAP3/ACTR10/ACTR1A/DYNC1I2/KDELR1/DCTN6/DCTN1/SPTAN1/TMEM115/ARF3
liver	SIGNALING BY FGFR2 IIIA TM	1.59338	0.0383228	POLR2H/POLR2E/POLR2K/POLR2G/POLR2J/GTF2F2/POLR2I/POLR2F/POLR2C/NCBP2
liver	PROTEIN LOCALIZATION	1.59005	0.000450535	VDAC1/HSD17B4/CHCHD10/MPV17/ECH1/TIMM8B/TIMM17A/IDH1/HMGCL/ACOT2/ALDH3A2/ACO2/HSPD1/SEC61B/SGTA/CYB5A/ABCD1/CYC1/TIMM13/SEC61G/MTX2/TIMM50/MTX1/COA4/GRPEL1/PMPCB/SLC25A13/TIMM8A/CRAT/TIMM10B/PHYH/PMPCA/EMD/TOMM40/TOMM5/TIMM44/COA6/VAPA/PEX3/PEX13/PEX10/GFER/HSPA9/ECI2/SCP2/DNAJC19/MLYCD/CHCHD4/TIMM21/CHCHD3/HMOX1/FIS1/UBB/UBC/UBE2J2/GDAP1/CHCHD2/PIPOX/PEX5/PEX19/TIMM10/UBE2D2/PXMP4/SAMM50/DECR2/A…
liver	SEPARATION OF SISTER CHROMATIDS	1.58499	0.000290788	TUBA1C/TUBB4B/TUBB6/TUBA1B/PSMB2/PSMD2/PSMD14/PSMA5/PSMC1/PSMB6/PSMD13/MAD1L1/PSMB5/PSMD3/PSMD8/PSMB7/ANAPC11/PSMC4/PSMD6/SMC3/PSMC3/PSMC5/PSMA3/PSMB1/PSMA7/PSMD7/PSMD11/PSMA1/PSMD1/PSMD4/PSMD9/NUDC/PSMB3/PSME3/PMF1/SEC13/PSMB4/PSMD10/ANAPC15/DYNC1I2/NUP85/PSMF1/ANAPC10/CDC16/NUP160/PPP1CC/ANAPC7/CENPP/XPO1/PSMC2/PSMB8/UBB/PPP2R1A/PSMC6/UBC/CENPU/ZWINT/ANAPC2/MAPRE1/PPP2R5D/RANBP2/UBE2E1/CENPQ/PP…
liver	RESPIRATORY ELECTRON TRANSPORT ATP SYNTHESIS BY CHEMIOSMOTIC COUPLING AND HEAT PRODUCTION BY UNCOUPLING PROTEINS	1.58497	0.00430423	COX20/UCP2/COX5A/NDUFA8/NDUFB9/SDHC/UQCRC2/SDHD/SDHA/NDUFV1/NDUFA6/TRAP1/NDUFB4/NDUFAB1/TMEM126B/NDUFS8/NDUFB3/NDUFB6/NDUFS3/CYC1/NDUFS2/NDUFAF2/NDUFC1/CYCS/NDUFAF3/NDUFB2/SDHB/NDUFB10/UQCRFS1/NDUFAF6/NDUFAF1/NDUFS1/NDUFC2/TACO1/SCO1/NDUFS5/NDUFA4/COX7B/NDUFB7/TMEM186/NDUFA5/NDUFS6/UQCR10/COX14/NDUFA1/COX6A1/COQ10A/ETFB/COX6C/NDUFV2/TIMMDC1/ETFA/UQCRC1/ECSIT/NDUFA9/NDUFS7/COX8A
liver	HOST INTERACTIONS OF HIV FACTORS	1.5807	0.00209449	HMGA1/AP2M1/ATP6V1H/RAN/PSMB2/PSMD2/PSMD14/PSMA5/PSMC1/PSMB6/PSMD13/PSMB5/PSMD3/PSMD8/ARF1/PSMB7/BANF1/PSMC4/PSMD6/PSMC3/PSMC5/PSMA3/AP1S1/PSMB1/PSMA7/PSMD7/PSMD11/PSMA1/PSMD1/APOBEC3G/RANBP1/PSMD4/PSMD9/PSMB3/PSME3/NPM1/SEC13/PSMB4/SLC25A5/PSMD10/AP2A2/NUP85/CD28/LCK/PSMF1/AP2S1/NUP160/AP1B1/XPO1/PSMC2/PSMB8/UBB/PSMC6/UBC/NUP155/HLA-A/RANBP2/RCC1/NUP93/NUP188/SEH1L
liver	L1CAM INTERACTIONS	1.57945	0.00430798	ALCAM/TUBA1C/TUBB4B/NRP2/TUBB6/SDCBP/AP2M1/TUBA1B/CLTA/HSPA8/CSNK2B/RDX/CSNK2A2/RPS6KA1/MAPK3/ACTG1/PAK1/LYPLA2/AP2A2/AP2S1/EPHB2/NRP1/SPTAN1/MAP2K2/ITGAV/RPS6KA2
liver	N GLYCAN TRIMMING IN THE ER AND CALNEXIN CALRETICULIN CYCLE	1.57829	0.0477694	CALR/PDIA3/VCP/DERL2/PSMC1/DERL1/RNF5/MLEC/CANX/GANAB/OS9/RNF185/MAN1B1/EDEM2/UBB/UBC/RAD23B/NGLY1
liver	CELLULAR RESPONSE TO CHEMICAL STRESS	1.5751	0.00145484	TXN/P4HB/PRDX1/ATOX1/HM13/PSMB2/COX20/PSMD2/BLVRB/PSMD14/PSMA5/COX5A/PSMC1/PSMB6/PSMD13/PRDX6/PSMB5/PSMD3/PSMD8/PSMB7/HMOX2/PSMC4/PSMD6/SOD1/PRDX3/HDAC3/PSMC3/CSNK2B/PSMC5/PSMA3/PSMB1/NCF2/PSMA7/GPX3/TXNRD1/PSMD7/PSMD11/PSMA1/PSMD1/KEAP1/PSMD4/CSNK2A2/CYCS/PSMD9/PSMB3/PSME3/PSMB4/CARM1/PSMD10/SOD2/NFE2L2/TACO1/SCO1/NUDT2/PSMF1/NDUFA4/TXN2/COX7B/PRDX5/PSMC2/PSMB8/ABCC1/HMOX1/UBB/COX14/PSMC6/UBC/CO…
liver	PROXIMAL TUBULE BICARBONATE RECLAMATION	1.57451	0.0499614	CA2/MDH1/PCK2/ATP1B1
liver	TRANSCRIPTIONAL REGULATION BY RUNX2	1.56918	0.00522964	LGALS3/CDK4/PSMB2/PSMD2/PSMD14/PSMA5/PSMC1/PSMB6/PSMD13/HES1/PSMB5/PSMD3/PSMD8/PSMB7/PSMC4/PSMD6/HDAC3/PSMC3/PSMC5/PSMA3/PSMB1/PSMA7/PSMD7/PSMD11/PSMA1/PSMD1/PSMD4/PSMD9/PSMB3/PSME3/MAPK3/PSMB4/PSMD10/AKT1/PSMF1/STAT1/PSMC2/CCNB1/PSMB8/RBM14/UBB/PSMC6/UBC/CDK1
liver	MITOTIC METAPHASE AND ANAPHASE	1.56377	0.000129259	TUBA1C/TUBB4B/TUBB6/RAN/TUBA1B/PSMB2/PSMD2/PSMD14/PSMA5/PSMC1/PSMB6/PSMD13/MAD1L1/PSMB5/PSMD3/PSMD8/PSMB7/ANAPC11/BANF1/PSMC4/PSMD6/SMC3/PSMC3/PSMC5/PSMA3/PSMB1/CHMP2A/SIRT2/PSMA7/CHMP4A/PSMD7/UBE2I/PSMD11/CHMP2B/PSMA1/PSMD1/CHMP3/PSMD4/LMNA/PSMD9/NUDC/PSMB3/PSME3/TNPO1/CHMP4B/PMF1/SEC13/PSMB4/PSMD10/ANAPC15/DYNC1I2/EMD/NUP85/PSMF1/ANAPC10/CDC16/NUP160/PPP1CC/ANAPC7/CENPP/XPO1/PSMC2/CCNB1/PSMB8/U…
liver	PLASMA LIPOPROTEIN ASSEMBLY REMODELING AND CLEARANCE	1.56311	0.0139147	APOC1/APOC2/LPL/A2M/APOE/P4HB/LIPA/AP2M1/CLTA/SCARB1/SOAT1/PRKACB/NR1H3/HDLBP/NPC1/NR1H2/LSR/NPC2/AP2A2/AP2S1/NCEH1
liver	MITOTIC G2 G2 M PHASES	1.56231	0.000439967	TUBA1C/PHLDA1/TUBB4B/TUBB6/TUBB/TUBA1B/PSMB2/PSMD2/PSMD14/PSMA5/PSMC1/PSMB6/PSMD13/PSMB5/PSMD3/PSMD8/PSMB7/PSMC4/PSMD6/DCTN2/PSMC3/CETN2/HSP90AB1/PSMC5/SSNA1/PSMA3/PSMB1/PSMA7/MZT1/PSMD7/PSMD11/PCM1/PSMA1/PSMD1/MZT2A/OPTN/PSMD4/PSMD9/PSMB3/PSME3/PSMB4/MZT2B/CDC25B/LCMT1/PSMD10/CEP41/ACTR1A/DYNC1I2/PSMF1/HAUS2/DCTN1/XPO1/PSMC2/RAB8A/CCNB1/PSMB8/UBB/PPP2R1A/PSMC6/UBC/TUBG1/HAUS3/CDK1/MAPRE1/LIN37/T…
liver	TCR SIGNALING	1.55866	0.00386404	HLA-DQA2/HLA-DQB2/PSMB2/PSMD2/PSMD14/PSMA5/PSMC1/PSMB6/PSMD13/EVL/CD3D/PSMB5/PSMD3/PSMD8/PSMB7/NCK1/PSMC4/PSMD6/HLA-DQA1/PSMC3/PSMC5/PSMA3/PSMB1/CD3E/PSMA7/PSMD7/PSMD11/PSMA1/PSMD1/PIK3R1/PSMD4/PSMD9/PSMB3/PSME3/PAK1/PSMB4/HLA-DQB1/HLA-DRB5/HLA-DPA1/PSMD10/CDC34/LCK/PSMF1/HLA-DRA/HLA-DPB1/HLA-DRB1/RELA/PSMC2/PDPK1/UBE2N/PSMB8/IKBKG/UBB/PSMC6/UBC
liver	COLLAGEN DEGRADATION	1.55504	0.0307018	MMP9/CTSD/CTSL/MMP14/CTSB/ADAM9/CTSK
liver	ANTIGEN PROCESSING AND PRESENTATION	1.55262	0.0156787	CALR/CTSL/LGMN/HLA-DQA2/PDIA3/HSPA5/CTSB/HLA-DMB/HSPA8/HLA-DQA1/HSP90AB1/HLA-DMA/HSPA4/HLA-DOA/PSME3/CANX/HLA-DQB1/HLA-DRB5/HLA-DPA1/HLA-DRA/HLA-DPB1/HLA-DRB1/NFYC/CIITA/RFX5/CD74/HLA-A/HSP90AA1/HLA-F/HSPA2/HLA-DOB/HLA-G/RFXANK
liver	GOLGI TO ER RETROGRADE TRANSPORT	1.55195	0.00386404	TUBA1C/TUBB4B/TMED9/RAB1A/TUBB6/TMED10/KDELR2/TMED2/TUBA1B/COPZ1/NAPA/ARF1/DCTN2/SURF4/COPE/RAB18/TMED3/CAPZB/COPB1/ARFGAP1/ARF4/PAFAH1B3/ARFGAP3/ACTR10/ACTR1A/DYNC1I2/KIF5B/KDELR1/DCTN6/KLC1/DCTN1/KIF22/ARF3/STX18/USE1
liver	IRE1ALPHA ACTIVATES CHAPERONES	1.5489	0.0287552	PDIA6/HSPA5/ACADVL/ATP6V0D1/SRPRB/YIF1A/HYOU1/WIPI1/ARFGAP1/LMNA/DNAJC3/GFPT1/DNAJB9/WFS1/DNAJB11/DCTN1/ZBTB17/PREB/SEC31A/KLHDC3/EXTL2/DDX11/SHC1/ERN1/TLN1/SULT1A3
liver	PYRUVATE METABOLISM AND CITRIC ACID TCA CYCLE	1.54852	0.0256881	VDAC1/SLC16A3/LDHA/BSG/SDHC/LDHB/IDH2/SDHD/SDHA/FAHD1/SUCLG1/ACO2/GLO1/MDH2/GSTZ1/DLD/PDHA1/SDHB/MPC1/ME3/ME2/FH/HAGH/PDHB/SLC16A1/IDH3B/MPC2/PPARD/DLST/D2HGDH/SUCLA2/PDP1/IDH3G
liver	VASOPRESSIN REGULATED WATER REABSORPTION	1.54679	0.0499614	STX4/RAB5C/DCTN2/ADCY3/CREB3L2/PRKACB/ARHGDIA/CREB3/RAB5A/GNAS/RAB11B/DYNC1I2/DCTN6/DCTN1/RAB11A/RAB5B
liver	FCERI MEDIATED NF KB ACTIVATION	1.5467	0.0153144	PSMB2/PSMD2/PSMD14/PSMA5/PSMC1/PSMB6/PSMD13/PSMB5/PSMD3/PSMD8/PSMB7/PSMC4/PSMD6/PSMC3/PSMC5/PSMA3/PSMB1/PSMA7/PSMD7/PSMD11/PSMA1/PSMD1/PSMD4/PSMD9/PSMB3/PSME3/PSMB4/PSMD10/CDC34/PSMF1/RELA/PSMC2/PDPK1/UBE2N/PSMB8/IKBKG/UBB/PSMC6/UBC
liver	UNFOLDED PROTEIN RESPONSE UPR	1.54459	0.0157732	CALR/PDIA6/HSPA5/ACADVL/ATF3/ATP6V0D1/HSP90B1/SRPRB/CREB3L2/CREB3/YIF1A/KHSRP/EIF2S1/DDIT3/HYOU1/WIPI1/ARFGAP1/LMNA/HERPUD1/DNAJC3/CEBPG/EXOSC8/GFPT1/ATF4/DNAJB9/WFS1/DNAJB11/DCTN1/ZBTB17/PREB/EXOSC7/EXOSC5/SEC31A/NFYC/DCSTAMP/EXOSC1/KLHDC3/EXTL2/MBTPS2/DDX11/SHC1/ERN1/TLN1/SULT1A3/CREBRF/EXOSC3
liver	HUNTINGTONS DISEASE	1.53865	0.00336039	VDAC1/AP2M1/PPARG/COX5A/NDUFA8/NDUFB9/CLTA/SDHC/UQCRC2/VDAC3/SOD1/DCTN2/SDHD/SDHA/NDUFV1/NDUFA6/CREB3L2/NDUFB4/NDUFAB1/POLR2H/NDUFS8/POLR2E/CREB3/NDUFB3/NDUFB6/NDUFS3/CYC1/NDUFS2/NDUFC1/POLR2K/POLR2G/CYCS/POLR2J/NDUFB2/SDHB/NDUFB10/UQCRFS1/SLC25A5/NDUFS1/SOD2/NDUFC2/AP2A2/VDAC2/NDUFS5/AP2S1/NDUFA4/COX7B/DCTN1/POLR2I/NDUFB7/CASP3/PPID/POLR2F/POLR2C/NDUFA5/NDUFS6/UQCR10/NDUFA1/COX6A1/GPX1/CLTB/COX6…
liver	CYTOPROTECTION BY HMOX1	1.53802	0.00386404	HM13/PSMB2/COX20/PSMD2/BLVRB/PSMD14/PSMA5/COX5A/PSMC1/PSMB6/PSMD13/PSMB5/PSMD3/PSMD8/PSMB7/HMOX2/PSMC4/PSMD6/HDAC3/PSMC3/CSNK2B/PSMC5/PSMA3/PSMB1/PSMA7/PSMD7/PSMD11/PSMA1/PSMD1/KEAP1/PSMD4/CSNK2A2/CYCS/PSMD9/PSMB3/PSME3/PSMB4/CARM1/PSMD10/NFE2L2/TACO1/SCO1/PSMF1/NDUFA4/COX7B/PSMC2/PSMB8/ABCC1/HMOX1/UBB/COX14/PSMC6/UBC/COX6A1/CHD9
liver	TNFR2 NON CANONICAL NF KB PATHWAY	1.53564	0.0139147	TNFRSF14/PSMB2/PSMD2/PSMD14/PSMA5/PSMC1/PSMB6/PSMD13/TNFSF12/PSMB5/PSMD3/PSMD8/PSMB7/PSMC4/PSMD6/PSMC3/PSMC5/PSMA3/PSMB1/PSMA7/PSMD7/PSMD11/PSMA1/PSMD1/PSMD4/PSMD9/PSMB3/PSME3/CD27/PSMB4/TNFRSF4/CD40/PSMD10/PSMF1/TRAF2/PSMC2/PSMB8/TNFRSF18/UBB/PSMC6/UBC
liver	HIV INFECTION	1.53477	0.000161688	HMGA1/AP2M1/ATP6V1H/RAN/PSMB2/PSMD2/CCR5/PSMD14/PSMA5/PSMC1/PSMB6/PSMD13/PSMB5/PSMD3/PSMD8/ARF1/PSMB7/CXCR4/TAF9/BANF1/PSMC4/PSMD6/PSMC3/PSMC5/PSMA3/AP1S1/PSMB1/CHMP2A/POLR2H/PSMA7/POLR2E/CHMP4A/PSMD7/PSMD11/CHMP2B/PSMA1/PSMD1/APOBEC3G/RANBP1/TAF7/CHMP3/POLR2K/PSMD4/POLR2G/POLR2J/PSMD9/PSMB3/PSME3/VTA1/CHMP4B/NPM1/SEC13/PSMB4/SLC25A5/GTF2F2/PSMD10/VPS28/MVB12A/AP2A2/NUP85/CD28/LCK/NELFCD/PSMF1/AP…
liver	PTEN REGULATION	1.52668	0.00342022	RHEB/RRAGD/JUN/PSMB2/RRAGC/PSMD2/PPARG/PSMD14/PSMA5/PSMC1/PSMB6/PSMD13/PSMB5/PSMD3/PSMD8/MAF1/PSMB7/PSMC4/PSMD6/HDAC3/PSMC3/CSNK2B/LAMTOR5/PSMC5/PSMA3/LAMTOR1/PSMB1/PSMA7/MLST8/PSMD7/PSMD11/PSMA1/PSMD1/LAMTOR3/PSMD4/CSNK2A2/EED/LAMTOR2/PSMD9/PSMB3/PSME3/MAPK3/PSMB4/PSMD10/AKT1/PSMF1/PSMC2/RING1/PSMB8/RBBP7/UBB/PSMC6/UBC/TRIM27/CHD4/TNRC6C
liver	PARKINSONS DISEASE	1.52325	0.0112753	VDAC1/SNCA/COX5A/NDUFA8/NDUFB9/SDHC/UQCRC2/VDAC3/SDHD/SDHA/NDUFV1/NDUFA6/PARK7/UCHL1/NDUFB4/NDUFAB1/NDUFS8/NDUFB3/NDUFB6/NDUFS3/CYC1/NDUFS2/NDUFC1/UBE2L3/CYCS/HTRA2/PINK1/NDUFB2/SDHB/NDUFB10/UQCRFS1/SLC25A5/NDUFS1/UBE2L6/NDUFC2/VDAC2/NDUFS5/NDUFA4/COX7B/NDUFB7/CASP3/PPID/NDUFA5/NDUFS6/UQCR10/UBB/NDUFA1/UBE2J2/COX6A1/COX6C/NDUFV2/UQCRC1/NDUFA9/NDUFS7/COX8A/UBE2J1/COX5B
liver	MRNA SPLICING	1.52201	0.00158931	SNRPC/LSM4/HSPA8/SNRNP25/PUF60/PPIL1/SNRPB/CWC15/SNRNP40/POLR2H/POLR2E/ZCRB1/DNAJC8/HNRNPM/YBX1/POLR2K/SNRPD3/RBM8A/NUDT21/WBP4/CD2BP2/POLR2G/PPIH/UPF3B/POLR2J/SNRNP48/SRRT/LSM3/LSM2/PPIL4/FIP1L1/CTNNBL1/GTF2F2/SNRNP70/PPIE/WDR33/SNRPE/HNRNPA3/SF3B5/ZRSR2/CRNKL1/SNRPF/SRSF4/BUD31/SNRPB2/PCBP1/SNRNP27/CDC5L/HNRNPF/HNRNPA0/POLR2I/ZMAT5/TFIP11/PRPF31/CWC25/POLR2F/POLR2C/NCBP2/SF3A2/CWC27/DDX23/EIF4A…
liver	NEDDYLATION	1.51923	0.000686588	CUL9/PSMB2/PSMD2/PSMD14/PSMA5/PSMC1/PSMB6/PSMD13/COMMD4/PSMB5/PSMD3/PSMD8/PSMB7/COPS7A/PSMC4/PSMD6/FEM1B/PSMC3/PSMC5/PSMA3/DCUN1D5/PSMB1/PSMA7/COMMD5/PSMD7/PSMD11/PSMA1/PSMD1/COMMD9/COPS2/WSB2/FBXW5/KEAP1/PSMD4/COMMD3/PSMD9/PSMB3/PSME3/LRRC41/DDB1/FBXO7/COMMD2/FBXL12/PSMB4/COMMD1/KCTD6/PSMD10/SOCS6/COMMD10/DCAF13/CUL4A/FBXL15/DDA1/FEM1C/UCHL3/FBXO4/PSMF1/ASB6/RNF7/DCAF7/GPS1/COPS3/KBTBD7/COPS8/DC…
liver	DRUG METABOLISM CYTOCHROME P450	1.51773	0.044783	MGST3/GSTO1/ADH5/ALDH3B1/GSTM4/GSTZ1/MGST2
liver	METABOLISM OF AMINO ACIDS AND DERIVATIVES	1.51119	6.01983e-05	SDS/SDSL/IL4I1/SMS/FAH/BCAT1/SLC3A2/PCBD1/PSMB2/AHCY/PSMD2/OAZ2/PSMD14/PSMA5/TSTD1/ASRGL1/PSMC1/PSMB6/PSMD13/PAPSS1/PSMB5/PSMD3/PSMD8/PSMB7/ENOPH1/AIMP2/NQO1/PSMC4/PSMD6/RPS27L/PSMC3/GOT2/GCSH/PSMC5/NDUFAB1/PSMA3/PSMB1/GLUL/PSMA7/SRM/TXNRD1/PSMD7/PSMD11/ECHS1/PSMA1/PSMD1/HAAO/GRHPR/GSTZ1/DLD/PSMD4/RPL26L1/HSD17B10/KMO/PSMD9/PDHA1/PSMB3/PSME3/PSMB4/SLC25A13/PSMD10/BCKDK/MTAP/ASL/PSMF1/NMRAL1/TXN2/…
liver	NUCLEOTIDE EXCISION REPAIR	1.50323	0.0219736	HMGN1/TFPT/COPS7A/CETN2/POLR2H/POLR2E/RAD23A/UBE2I/COPS2/POLR2K/PCNA/RPA3/POLR2G/POLR2J/DDB1/SUMO3/UBE2V2/RPA2/PPIE/RFC2/CUL4A/GTF2H5/GPS1/MCRS1/COPS3/LIG1/POLR2I/COPS8/XPC/GTF2H3/POLR2F/POLR2C/GTF2H1/ACTR5/UBE2N/RPA1/UBB/COPS6/UBC/CUL4B/RFC1/RAD23B/ISY1/CHD1L/NFRKB/COPS5/GTF2H2/POLD2/POLE3/INO80E/SUMO1/PARP1/ERCC5
liver	TRANSCRIPTION COUPLED NUCLEOTIDE EXCISION REPAIR TC NER	1.50295	0.0428092	HMGN1/COPS7A/POLR2H/POLR2E/COPS2/POLR2K/PCNA/RPA3/POLR2G/POLR2J/DDB1/RPA2/PPIE/RFC2/CUL4A/GTF2H5/GPS1/COPS3/LIG1/POLR2I/COPS8/GTF2H3/POLR2F/POLR2C/GTF2H1/RPA1/UBB/COPS6/UBC/CUL4B/RFC1/ISY1/COPS5/GTF2H2/POLD2
liver	INTRA GOLGI AND RETROGRADE GOLGI TO ER TRAFFIC	1.49894	0.0025974	TUBA1C/TUBB4B/TMED9/RAB1A/TUBB6/TMED10/KDELR2/M6PR/RAB9A/TMED2/TUBA1B/COPZ1/SYS1/NAPA/ARF1/PLIN3/DCTN2/RHOBTB3/SURF4/ARL1/COPE/SCOC/RAB18/TMED3/IGF2R/CAPZB/SNAP29/COPB1/ARFGAP1/COG4/ARF4/YKT6/PAFAH1B3/ARFGAP3/CYTH2/ACTR10/ARFIP2/GOLGA5/RAB39A/ACTR1A/DYNC1I2/ARFRP1/KIF5B/KDELR1/DCTN6/GOLIM4/KLC1/DCTN1/KIF22/ARF3/STX18/TRIP11/USE1/VAMP3/BNIP1/CYTH3/PAFAH1B1/KIF2A/STX6/COPG1/VAMP4/DYNC1H1/GOSR1/ZW10…
liver	S PHASE	1.4938	0.00437819	CDK4/PSMB2/PSMD2/PSMD14/PSMA5/PSMC1/PSMB6/PSMD13/PSMB5/PSMD3/PSMD8/PSMB7/ANAPC11/PSMC4/PSMD6/SMC3/PSMC3/MCM3/PSMC5/PSMA3/PSMB1/PSMA7/PSMD7/PSMD11/PSMA1/PSMD1/PCNA/RPA3/PSMD4/PSMD9/PSMB3/PSME3/PSMB4/CDC25B/RPA2/PSMD10/ANAPC15/AKT1/RFC2/PSMF1/ANAPC10/CDC16/E2F4/LIG1/ANAPC7/MCM6/PSMC2/RPA1/PSMB8/UBB/PSMC6/UBC/ANAPC2/LIN37/RFC1/ESCO1/GSK3B/UBE2E1
liver	NUCLEAR ENVELOPE NE REASSEMBLY	1.49326	0.0477797	TUBA1C/TUBB4B/TUBB6/RAN/TUBA1B/BANF1/CHMP2A/SIRT2/CHMP4A/UBE2I/CHMP2B/CHMP3/LMNA/TNPO1/CHMP4B/SEC13/EMD/NUP85/NUP160/CCNB1/PPP2R1A/CDK1/ANKLE2/CC2D1B/IST1/NUP155/RCC1/NUP93/NUP188/SEH1L/SUMO1/NUP62/TUBA1A/NUP54/CCNB2/NUP37/PPP2CA/CHMP6/VPS4A/CHMP7/TUBB2A/VRK1
liver	TRANSCRIPTIONAL REGULATION BY RUNX3	1.48012	0.025272	SPP1/PSMB2/PSMD2/PSMD14/PSMA5/PSMC1/PSMB6/PSMD13/HES1/PSMB5/PSMD3/PSMD8/PSMB7/PSMC4/PSMD6/PSMC3/PSMC5/PSMA3/PSMB1/PSMA7/PSMD7/PSMD11/PSMA1/PSMD1/PSMD4/PSMD9/PSMB3/PSME3/PSMB4/ZFHX3/PSMD10/PSMF1/TCF7/PSMC2/PSMB8/UBB/PSMC6/UBC
liver	ER TO GOLGI ANTEROGRADE TRANSPORT	1.47936	0.010786	TUBA1C/TUBB4B/TMED9/RAB1A/TUBB6/TMED10/KDELR2/TMED2/TUBA1B/COPZ1/CTSZ/CD59/NAPA/SEC22C/ARF1/DCTN2/MCFD2/LMAN2/COPE/CTSC/BET1/LMAN1/TRAPPC2L/TMED3/CAPZB/COPB1/ARFGAP1/COG4/ARF4/YKT6/TRAPPC6A/TRAPPC4/ARFGAP3/ACTR10/SEC13/TRAPPC3/TFG/ACTR1A/DYNC1I2/KDELR1/DCTN6/DCTN1/PREB/SEC31A/SPTAN1/TMEM115/ARF3
liver	PROCESSING OF CAPPED INTRON CONTAINING PRE MRNA	1.47895	0.000960708	DDX39A/SNRPC/LSM4/HSPA8/SLBP/SNRNP25/PUF60/PPIL1/SNRPB/CWC15/SNRNP40/POLR2H/POLR2E/EIF4E/ZCRB1/DNAJC8/HNRNPM/YBX1/POLR2K/SNRPD3/RBM8A/NUDT21/WBP4/CD2BP2/POLR2G/PPIH/UPF3B/POLR2J/SNRNP48/SRRT/LSM3/LSM2/THOC7/PPIL4/SEC13/FIP1L1/CTNNBL1/GTF2F2/SNRNP70/PPIE/WDR33/SNRPE/HNRNPA3/SF3B5/ZRSR2/NUP85/CRNKL1/SNRPF/SRSF4/BUD31/SNRPB2/NUP160/PCBP1/SNRNP27/CDC5L/HNRNPF/HNRNPA0/POLR2I/ZMAT5/TFIP11/PRPF31/CWC25/…
liver	TRANSPORT TO THE GOLGI AND SUBSEQUENT MODIFICATION	1.47795	0.00374277	TUBA1C/TUBB4B/MGAT1/TMED9/RAB1A/TUBB6/TMED10/KDELR2/TMED2/MGAT4A/FUCA1/TUBA1B/COPZ1/CTSZ/CD59/NAPA/SEC22C/ARF1/DCTN2/MCFD2/LMAN2/COPE/CTSC/BET1/LMAN1/TRAPPC2L/TMED3/CAPZB/MGAT4B/COPB1/ARFGAP1/COG4/ARF4/YKT6/TRAPPC6A/TRAPPC4/ARFGAP3/ACTR10/SEC13/MGAT2/TRAPPC3/TFG/ACTR1A/DYNC1I2/KDELR1/DCTN6/B4GALT3/DCTN1/PREB/SEC31A/SPTAN1
liver	SIGNALING BY INSULIN RECEPTOR	1.47243	0.0462801	ATP6V1F/ATP6AP1/ATP6V1H/ATP6V1C1/ATP6V0D1/ATP6V1B2/ATP6V1D/ATP6V1E1/ATP6V1A/ATP6V0A1/PIK3R1/ATP6V0B/NRAS/ATP6V0D2/TCIRG1/MAPK3/ATP6V1G1/HRAS/PDPK1
liver	GLUCOSE METABOLISM	1.47115	0.0444971	FBP1/MDH1/PKM/GNPDA1/PCK2/ENO1/SLC25A1/GOT2/PRKACB/SLC37A2/MDH2/PFKP/SLC25A11/SEC13/PGP/PFKL/SLC25A13/PC/HK1/NUP85/SLC37A4/NUP160/ALDOA/GPI/PPP2R1A/PGAM1/PPP2R5D/NUP155/RANBP2/NUP93/NUP188/TPI1/SEH1L/G6PC3
liver	DEGRADATION OF BETA CATENIN BY THE DESTRUCTION COMPLEX	1.46192	0.0499614	PSMB2/PSMD2/PSMD14/PSMA5/PSMC1/PSMB6/PSMD13/PSMB5/PSMD3/PSMD8/PSMB7/PSMC4/PSMD6/PSMC3/PSMC5/PSMA3/PSMB1/PSMA7/PSMD7/PSMD11/PSMA1/PSMD1/PSMD4/PSMD9/PSMB3/PSME3/TLE3/PSMB4/PSMD10/PSMF1/TCF7/PSMC2/PSMB8/UBB/PPP2R1A/PSMC6/UBC
liver	CELL CYCLE CHECKPOINTS	1.45123	0.00221606	PSMB2/PSMD2/PSMD14/PSMA5/PSMC1/PSMB6/PSMD13/MAD1L1/PSMB5/PSMD3/PSMD8/PSMB7/ANAPC11/DBF4/PSMC4/PSMD6/PSMC3/MCM3/PSMC5/PSMA3/PSMB1/RHNO1/PSMA7/KAT5/PSMD7/PSMD11/PSMA1/PSMD1/ZNF385A/RPA3/PSMD4/PSMD9/NUDC/PSMB3/PSME3/PMF1/SEC13/PSMB4/UBE2V2/RPA2/PSMD10/ANAPC15/DYNC1I2/RFC2/NUP85/PSMF1/ANAPC10/CDC16/NUP160/BABAM1/PPP1CC/ANAPC7/CENPP/XPO1/MCM6/PSMC2/UBE2N/RPA1/CCNB1/PSMB8/YWHAH/UBB/HUS1/PPP2R1A/PSMC6/U…
liver	M PHASE	1.4387	0.000751642	TUBA1C/TUBB4B/NEK6/RAB1A/TUBB6/TUBB/RAN/TUBA1B/PSMB2/PSMD2/PSMD14/PSMA5/PSMC1/PSMB6/PSMD13/MAD1L1/PSMB5/PSMD3/PSMD8/PSMB7/ANAPC11/BANF1/PSMC4/PSMD6/SMC3/DCTN2/PSMC3/CETN2/CSNK2B/PSMC5/SSNA1/PSMA3/PSMB1/CHMP2A/SIRT2/PSMA7/MZT1/SMC2/CHMP4A/RAB2A/PSMD7/UBE2I/PSMD11/CHMP2B/PCM1/PSMA1/PSMD1/MZT2A/CHMP3/PSMD4/CSNK2A2/LMNA/PSMD9/NUDC/PSMB3/PSME3/TNPO1/MAPK3/CHMP4B/PMF1/SEC13/PSMB4/MZT2B/PSMD10/ANAPC15/G…
liver	TRANSLATION	1.43808	0.00200274	SEC11C/SSR3/SPCS2/MRPS7/MRPS6/MRPL4/TUFM/MRPL11/MRPL40/MRPL13/SRP9/MRPS11/MRPL35/MRPS16/AIMP2/RPN1/MRPL9/TRAM1/RPS27L/SRPRB/DDOST/CHCHD1/MRPL12/EIF4EBP1/MRPL34/SEC61B/MRPL51/MRPL15/MRPS21/EIF4E/MRPL2/MRPL47/EIF2B4/MRPL21/MRPL36/MRPS15/ERAL1/MRPL3/MRPS12/MRPL43/EIF4A1/MRPL20/SSR4/MRPL27/SEC61G/EIF2S1/TRMT112/MRPS25/RPL26L1/EIF3I/MRPL24/GSPT2/SRP68/RPN2/DAP3/MRPL17/MRPS18C/ETF1/MRPS34/MRPL19/DARS2/…
liver	BIOLOGICAL OXIDATIONS	1.42445	0.0392849	CYP27A1/MGST3/AKR1A1/GSTO1/ALDH1A1/GCLC/AHCY/FDX1/POR/PAPSS1/GCLM/NQO2/GGCT/DPEP2/ADH5/CNDP2/PTGES3/HSP90AB1/GSS/GSTM4/TRMT112/GSTZ1/TPST2/EPHX1/MGST2/ESD/AKR7A2/CES2/CYP4V2/AHR/N6AMT1/SMOX/SLC35B2/NAT1/ACSS1/BPHL/AIP/CYP2R1/POMC/GSTP1/CYB5R3/CYP3A5
liver	HIV LIFE CYCLE	1.41727	0.0499614	HMGA1/RAN/CCR5/CXCR4/TAF9/BANF1/CHMP2A/POLR2H/POLR2E/CHMP4A/CHMP2B/RANBP1/TAF7/CHMP3/POLR2K/POLR2G/POLR2J/VTA1/CHMP4B/SEC13/GTF2F2/VPS28/MVB12A/NUP85/NELFCD/GTF2H5/NUP160/LIG1/POLR2I/XRCC5/GTF2H3/POLR2F/NELFE/POLR2C/XPO1/GTF2H1/NCBP2/NELFA/UBB/NMT2/XRCC6/UBC/XRCC4/NUP155/RANBP2/RCC1/NUP93/NUP188/SEH1L/SUPT16H/GTF2F1/GTF2H2/PDCD6IP/CHMP5/VPS37A/NUP62/PPIA/NUP54/NMT1/TAF9B/NUP37/POM121C/CHMP6/VPS4A…
liver	METABOLISM OF STEROIDS	1.40064	0.0381385	CYP27A1/HSD3B7/LGMN/HSD17B4/HSD17B14/AKR1B1/SRD5A3/RAN/FDX1/OSBPL1A/INSIG1/MVD/EBP/UBE2I/ACAT2/FDPS/SQLE/HSD11B1/ARV1/NSDHL/CARM1/FDFT1/OSBPL9/SLC27A5/NFYC/SCP2/HMGCS1/HSD17B12/MSMO1/SC5D/CHD9/HSD17B7/CYP2R1/LSS/PMVK/POMC/MBTPS2
liver	FATTY ACID METABOLISM	1.39711	0.0462173	HSD17B4/DBI/ACADVL/ACAA2/ACOT13/GPX4/CBR1/SLC25A1/ACSF3/DPEP2/ACBD6/PTGES3/ACOT2/ALDH3A2/PON2/NDUFAB1/PTGR1/HADHA/ACOT9/PPT1/ABCD1/HADHB/ECHS1/ELOVL1/ACADM/FADS1/ACADS/CRAT/PHYH/LTA4H/TECR/HADH/ACSL4/PCCB/ECI2/SCP2/MLYCD/PTGES2/ABCC1/ECI1/HSD17B12/ACOT7/GPX1/MCEE/CPT2/PPARD/DECR2/ACOT4/MAPKAPK2/ALOX15B/ACSF2/ACBD5
liver	ANTIGEN PROCESSING UBIQUITINATION PROTEASOME DEGRADATION	1.29369	0.0461308	PSMB2/PSMD2/PSMD14/PSMA5/PSMC1/PSMB6/PSMD13/PSMB5/PSMD3/PSMD8/PSMB7/ANAPC11/UBE2E2/PSMC4/PSMD6/RNF130/PSMC3/PSMC5/ATG7/PSMA3/PSMB1/PSMA7/PSMD7/PSMD11/PSMA1/PSMD1/FBXW5/KEAP1/UBE2L3/PSMD4/CBLB/BLMH/PSMD9/PSMB3/PSME3/LRRC41/UBE2Q2/UBR4/FBXO7/ANAPC13/FBXL12/PSMB4/PJA1/KCTD6/UBAC1/UBE2V2/PSMD10/UBE2L6/UBE2D4/CDC34/FBXL15/FBXO4/SOCS1/PSMF1/ANAPC10/CDC16/RNF14/ASB6/RNF7/KBTBD7/HECTD2/ANAPC7/ITCH/UBE2F/…
liver	CELL CYCLE MITOTIC	1.28602	0.0126955	TUBA1C/PHLDA1/TUBB4B/NEK6/RAB1A/TUBB6/TUBB/RAN/TUBA1B/CDK4/PSMB2/PSMD2/PSMD14/PSMA5/PSMC1/PSMB6/PSMD13/MAD1L1/PSMB5/PSMD3/PSMD8/PSMB7/ANAPC11/DBF4/BANF1/PSMC4/PSMD6/SMC3/DCTN2/PSMC3/MCM3/CETN2/CSNK2B/HSP90AB1/PSMC5/SSNA1/PSMA3/PSMB1/CHMP2A/SIRT2/PSMA7/MZT1/SMC2/CHMP4A/RAB2A/PSMD7/UBE2I/PSMD11/CHMP2B/PCM1/PSMA1/PSMD1/MZT2A/OPTN/CHMP3/PCNA/RPA3/PSMD4/CSNK2A2/LMNA/PSMD9/NUDC/PSMB3/PSME3/TNPO1/MAPK3/…
liver	GPCR LIGAND BINDING	-1.23267	0.0400996	S1PR3/PTGIR/PROK2/ECE1/GNB1/OPRL1/S1PR4/CCL3/CALCRL/CYSLTR2/GPR65/LPAR6/GPR132/LTB4R/GNG12/GABBR1/CCL2/ADM/CCL3L3/C5AR2/HRH2/FFAR2/HCAR3/GNG2/CCL4/SUCNR1/CCR2/CYSLTR1/HCAR2/FPR2/FPR1/GPBAR1/P2RY13/CXCL12/CX3CR1/CD55
liver	INTERFERON SIGNALING	-1.36313	0.0381966	NUP210/SAMHD1/NUP98/TRIM26/USP18/PTPN11/GBP5/TYK2/IFI6/PML/PIAS1/SOCS3/RSAD2/JAK1/DDX58/OAS2/RAE1/HERC5/EIF4E3/GBP3/EIF2AK2/ICAM1/XAF1/PTPN6/IFITM1/TRIM25/IFIT2/STAT2/NUP214/TRIM38/ISG15/GBP4/CD44/FCGR1B/ADAR/MX2/IRF7/JAK2/IFIT1/TRIM22/EGR1/IFITM3/IFI27/IFITM2/VCAM1
liver	SELENOAMINO ACID METABOLISM	-1.40955	0.0219382	GNMT/RPLP2/RPS7/RPS9/RPL37/RPL23/RPS19/RPL5/RPL30/RPL39/RPS18/NNMT/RPL11/RPL35/RPL10L/RPL8/RPS4X/RPS8/RPS15/RPS23/RPS25/RPS24/RPS3A/RPL13A/RPL27/RPL18/RPL23A/RPS14/RPS11/RPS27A/RPL14/RPS16/RPL6/RPL31/AIMP1/RPL21/RPL36/RPL12/RPL13/RPS27/RPS26/RPS15A/RPL18A/RPL38/FAU/RPS6/RPL4/RPL24/RPS29/RPL32/RPL26/RPL35A/RPL22/RPL29/RPL7/RPL34/RPS13/RPL36A/RPS4Y1/RPL17
liver	NONSENSE MEDIATED DECAY NMD	-1.43596	0.034122	RPLP2/SMG8/RPS7/RPS9/RPL37/RPL23/RPS19/RPL5/RPL30/RPL39/RPS18/DCP1A/RPL11/RPL35/RPL10L/RPL8/RPS4X/RPS8/RPS15/RPS23/RPS25/RPS24/RPS3A/RPL13A/RPL27/RPL18/RPL23A/RPS14/RPS11/RPS27A/RPL14/RPS16/RPL6/RPL31/RPL21/RPL36/RPL12/RPL13/RPS27/RPS26/UPF2/RPS15A/RPL18A/RPL38/PPP2R2A/UPF1/FAU/RPS6/RPL4/RPL24/RPS29/RPL32/RPL26/RPL35A/RPL22/RPL29/RPL7/RPL34/RPS13/SMG1/PABPC1/RPL36A/RPS4Y1/RPL17
liver	LEISHMANIA INFECTION	-1.46193	0.0499614	JAK1/MAPK1/FOS/NFKBIA/MAPK14/PTPN6/TNF/ITGAM/TGFB1/CR1/FCGR3A/JAK2/PRKCB/NCF1/MARCKSL1/PTGS2/TLR2/IL1B
liver	EUKARYOTIC TRANSLATION INITIATION	-1.47117	0.0124829	RPS7/RPS9/RPL37/EIF3M/RPL23/RPS19/RPL5/RPL30/RPL39/RPS18/RPL11/RPL35/RPL10L/RPL8/RPS4X/RPS8/RPS15/RPS23/RPS25/RPS24/RPS3A/RPL13A/RPL27/RPL18/RPL23A/RPS14/RPS11/EIF2B1/RPS27A/RPL14/RPS16/RPL6/RPL31/RPL21/RPL36/RPL12/RPL13/RPS27/RPS26/EIF3G/RPS15A/RPL18A/RPL38/FAU/RPS6/RPL4/RPL24/RPS29/RPL32/RPL26/EIF2S3/EIF2B5/RPL35A/RPL22/RPL29/RPL7/EIF4B/RPL34/EIF3L/RPS13/EIF3E/EIF3H/PABPC1/RPL36A/RPS4Y1/RPL17
liver	APOPTOSIS	-1.47563	0.0405281	MYD88/TNFRSF10B/PRKAR1A/NFKB1/CASP10/TNFRSF10D/AKT3/PPP3CA/NFKBIA/PIK3R3/BIRC2/TP53/APAF1/TNF/ATM/CFLAR/CHP1/IL1RAP/BIRC3/IRAK3/TNFSF10/IL1B
liver	TOLL LIKE RECEPTOR CASCADES	-1.47692	0.00511477	CD14/GSDMD/RPS6KA5/NOD1/MYD88/FGG/DUSP7/MAP2K4/PTPN11/TLR10/NFKB1/FBXW11/TLR8/NFKB2/TLR1/PELI2/MAPK1/FOS/MAP2K3/NFKBIA/BIRC2/NOD2/MAPK14/MEF2A/ITGAM/MAP3K8/MAP3K1/IRF7/PLCG2/PELI1/DUSP6/BIRC3/MEF2C/IRAK3/TLR2/S100A9/S100A8/S100A12
liver	CHEMOKINE SIGNALING PATHWAY	-1.47912	0.00462918	PXN/PREX1/GRK6/FOXO3/RAC2/STAT5B/GNB1/NFKB1/JAK3/TIAM2/CCL3/STAT3/AKT3/PLCB2/WAS/FGR/MAPK1/PLCB1/GNG12/NFKBIA/ELMO1/PIK3R3/ADCY7/CCL2/CCL3L3/RAP1B/SOS2/HCK/PTK2/STAT2/CSK/GNG2/CCL4/DOCK2/JAK2/CCR2/LYN/RASGRP2/CCL4L2/CCL8/PRKCB/NCF1/CXCL12/CX3CR1
liver	ANTI INFLAMMATORY RESPONSE FAVOURING LEISHMANIA PARASITE INFECTION	-1.48388	0.0385677	PTGIR/GNB1/CALCRL/CYSLTR2/FGR/GNG12/ADAM17/ADCY7/ADM/MAPK14/IL6/HCK/FYN/HRH2/GNG2/FCGR3A/PLCG2/LYN/CYSLTR1/ITPR2/GPBAR1/CD163
liver	NEGATIVE REGULATION OF THE PI3K AKT NETWORK	-1.50178	0.0263683	FLT3/FGFR1/PIP4K2A/GAB2/ESR1/MYD88/PIP5K1A/PTPN11/RHOG/RAC2/AKT3/MAPK1/PIK3R3/PPP2R5C/FYN/IL1RAP/HBEGF/INSR/PIK3AP1/IRS2/NRG1/PTEN/EREG/AREG
liver	INTERLEUKIN 4 AND INTERLEUKIN 13 SIGNALING	-1.57202	0.0157861	FOXO3/POU2F1/TYK2/CEBPD/JAK3/STAT3/SOCS3/MYC/IL13RA1/JAK1/FOS/TP53/CCL2/TIMP1/ICAM1/HIF1A/IL6/FSCN1/VEGFA/TNF/F13A1/ITGAM/ALOX5/TGFB1/CCND1/BCL6/JAK2/TNFRSF1B/MCL1/PTGS2/IL1B/VCAM1
liver	NATURAL KILLER CELL MEDIATED CYTOTOXICITY	-1.57743	0.00957263	PIK3CD/KRAS/NCR1/SOS1/PRF1/FCGR3B/ITGAL/PRKCA/CD244/FCER1G/TNFRSF10B/NFATC2/PTPN11/RAC2/SH2D1B/TNFRSF10D/ARAF/PPP3CA/CD48/MAPK1/NFAT5/PIK3R3/ICAM1/PTPN6/SOS2/TNF/LCP2/FYN/SH3BP2/CHP1/FCGR3A/PLCG2/ICAM2/PRKCB/TNFSF10
liver	RESPONSE OF EIF2AK4 GCN2 TO AMINO ACID DEFICIENCY	-1.59075	0.0156787	RPLP2/RPS7/RPS9/RPL37/RPL23/RPS19/RPL5/RPL30/RPL39/RPS18/RPL11/RPL35/RPL10L/RPL8/RPS4X/RPS8/RPS15/RPS23/RPS25/RPS24/RPS3A/RPL13A/RPL27/RPL18/RPL23A/RPS14/RPS11/RPS27A/RPL14/RPS16/RPL6/RPL31/RPL21/RPL36/RPL12/RPL13/RPS27/RPS26/RPS15A/RPL18A/RPL38/FAU/RPS6/RPL4/RPL24/RPS29/RPL32/RPL26/EIF2S3/RPL35A/RPL22/RPL29/RPL7/RPL34/RPS13/RPL36A/RPS4Y1/CEBPB/RPL17
liver	ECM PROTEOGLYCANS	-1.5951	0.0499614	TGFB1/ITGA9/VCAN
liver	NOD LIKE RECEPTOR SIGNALING PATHWAY	-1.69291	0.0136066	MAPK1/CASP5/NFKBIA/BIRC2/CCL2/TNFAIP3/NOD2/MAPK14/PYCARD/CARD8/IL6/MEFV/NAIP/TNF/NLRP1/CASP1/NLRP3/BIRC3/CCL8/IL1B
liver	CYTOSOLIC DNA SENSING PATHWAY	-1.69791	0.0446985	DDX58/POLR1D/NFKBIA/PYCARD/IL6/CCL4/ADAR/IRF7/CASP1/CCL4L2/IL1B
liver	LEUKOCYTE TRANSENDOTHELIAL MIGRATION	-1.72265	0.00296907	PTK2B/ITGA4/TXK/VAV2/CTNNA3/ROCK2/PIK3CD/MYL12A/CYBA/ARHGAP5/CDC42/ITGAL/MSN/PRKCA/CLDN1/PXN/PTPN11/RAC2/ACTN4/VCL/SIPA1/PIK3R3/ICAM1/MAPK14/CTNND1/RAP1B/VASP/PTK2/ITGAM/PLCG2/CDH5/RASSF5/CYBB/PRKCB/NCF1/CXCL12/VCAM1
liver	TOLL LIKE RECEPTOR TLR1 TLR2 CASCADE	-1.72922	0.00278537	CD14/RPS6KA5/NOD1/MYD88/FGG/DUSP7/MAP2K4/NFKB1/FBXW11/NFKB2/TLR1/PELI2/MAPK1/FOS/MAP2K3/NFKBIA/NOD2/MAPK14/MEF2A/MAP3K8/MAP3K1/PELI1/DUSP6/MEF2C/IRAK3/TLR2/S100A9/S100A8/S100A12
liver	TXA2PATHWAY	-1.74976	0.00736826	PTGIR/GNB1/PLCB2/FGR/ARHGEF1/ICAM1/MAPK14/HCK/FYN/GNG2/LYN/PRKCB/VCAM1
liver	COMPLEMENT CASCADE	-1.75191	0.00725221	PROS1/C5AR2/CFH/CR1/CFD/FCN1/CD55/CFP
liver	INTERLEUKIN 10 SIGNALING	-1.80438	0.0196332	TYK2/CCL3/STAT3/JAK1/CCL2/TIMP1/ICAM1/CCL3L3/IL6/TNF/CCL4/CCR2/TNFRSF1B/IL10RA/FPR1/PTGS2/IL1B
liver	NICOTINAMIDE SALVAGING	-1.85944	0.0348879	PARP6/PARP8/PARP14/PARP9/NAMPT/PTGS2
liver	IRAK4 DEFICIENCY TLR2 4	-1.87	0.0434472	CD14/MYD88/FGG/TLR1/TLR2/S100A9/S100A8
liver	INTERFERON ALPHA BETA SIGNALING	-1.89205	0.00206465	SAMHD1/USP18/PTPN11/TYK2/IFI6/SOCS3/RSAD2/JAK1/OAS2/XAF1/PTPN6/IFITM1/IFIT2/STAT2/ISG15/ADAR/MX2/IRF7/IFIT1/EGR1/IFITM3/IFI27/IFITM2
liver	BIOCARTA NTHI PATHWAY	-1.90324	0.0462801	MAP2K6/MYD88/NFKB1/CREBBP/NR3C1/MAP2K3/NFKBIA/MAPK14/TNF/TGFBR2/IL1B
liver	ANTHRAX PATHWAY	-1.91359	0.0299278	MAPK1/MAP2K3/TNF/NLRP1/CASP1/IL1B/VCAM1
liver	COMMON PATHWAY OF FIBRIN CLOT FORMATION	-1.93094	0.0238	FGA/FGG/F5/PROS1/F13A1/THBD
liver	ANTIMICROBIAL PEPTIDES	-1.95694	0.0139147	CD4/TLR1/SLC11A1/CCR2/ITLN1/TLR2/S100A9/S100A8
liver	REGULATION OF TLR BY ENDOGENOUS LIGAND	-1.96793	0.0171763	CD14/GSDMD/FGG/TLR1/TLR2/S100A9/S100A8
liver	RIBOSOME	-1.97334	0.000161688	RPLP2/RPS7/RPS9/RPL37/RPL23/RPS19/RPL5/RPL30/RPL39/RPS18/RPL11/RPL35/RPL10L/RPL8/RPS4X/RPS8/RPS15/RPS23/RPS25/RPS24/RPS3A/RPL13A/RPL27/RPL18/RPL23A/RPS11/RPS27A/RPL14/RPS16/RPL6/RPL31/RPL21/RPL36/RPL12/RPL13/RPS27/RPS26/RPS15A/RPL18A/RPL38/RSL24D1/FAU/RPS6/RPL4/RPL24/RPS29/RPL32/RPL26/RPL35A/RPL22/RPL29/RPL7/RPL34/RPS13/RPL36A/RPS4Y1/RPL17
liver	GLYPICAN 1PATHWAY	-1.97708	0.0160149	FGR/HCK/VEGFA/FYN/TGFB1/PRNP/NRG1/TGFBR2/LYN
liver	RHO GTPASES ACTIVATE NADPH OXIDASES	-1.98494	0.0240652	MAPK1/MAPK14/CYBB/PRKCB/NCF1/S100A9/S100A8
liver	TOLL ENDOGENOUS PATHWAY	-1.99385	0.0101428	TLR1/TLR2/S100A9/S100A8/VCAN
liver	BIOCARTA EICOSANOID PATHWAY	-2.03897	0.0161416	PTGIR/CYSLTR2/PTGS1/PLCB1/HPGDS/TBXAS1/ALOX5/CYSLTR1/PTGS2
liver	DISEASES ASSOCIATED WITH O GLYCOSYLATION OF PROTEINS	-2.0398	0.00133382	MUC6/POMGNT1/ADAMTSL4/NOTCH4/GALNT3/LFNG/C1GALT1/NOTCH2/ADAMTS2/THBS1/CFP
liver	ERBB2 ACTIVATES PTK6 SIGNALING	-2.05246	0.00643722	ERBB3/NRG3/HBEGF/NRG1/EREG
liver	ERBB NETWORK PATHWAY	-2.0549	0.00521706	NRG3/HBEGF/NRG1/EREG/AREG
liver	EUKARYOTIC TRANSLATION ELONGATION	-2.1059	1.3106e-05	RPLP2/RPS7/RPS9/RPL37/RPL23/RPS19/RPL5/RPL30/RPL39/RPS18/RPL11/RPL35/RPL10L/RPL8/RPS4X/RPS8/RPS15/RPS23/RPS25/RPS24/RPS3A/RPL13A/RPL27/RPL18/RPL23A/RPS14/RPS11/RPS27A/RPL14/EEF1G/RPS16/RPL6/RPL31/RPL21/RPL36/RPL12/RPL13/RPS27/RPS26/RPS15A/RPL18A/RPL38/FAU/RPS6/RPL4/RPL24/RPS29/RPL32/RPL26/RPL35A/RPL22/RPL29/RPL7/EEF2/RPL34/RPS13/EEF1D/RPL36A/RPS4Y1/RPL17
liver	O GLYCOSYLATION OF TSR DOMAIN CONTAINING PROTEINS	-2.28138	0.000393836	ADAMTSL4/ADAMTS2/THBS1/CFP
lung	DEGRADATION OF THE EXTRACELLULAR MATRIX	1.92423	1.832e-07	SPP1/MMP9/MMP7/CTSK/A2M/HTRA1/CTSL/COL4A2/MMP14/ADAM8/MMP12/COL8A2/COL6A2/ADAM9/COL6A1/FURIN/MMP8/MMP2/CTSB/CAPN2/ADAM10/TIMP2/TIMP1/ADAM15/LAMA3/MMP19/MMP10/CTSD/MMP1
lung	COLLAGEN DEGRADATION	1.90395	1.4557e-05	MMP9/MMP7/CTSK/CTSL/COL4A2/MMP14/MMP12/COL8A2/COL6A2/ADAM9/COL6A1/FURIN/MMP8/MMP2/CTSB/ADAM10/MMP19/MMP10/CTSD/MMP1
lung	OXIDATIVE PHOSPHORYLATION	1.83831	6.21834e-05	ATP6V0D2/ATP6V1A/ATP6V1C1/NDUFS6/TCIRG1/NDUFAB1/ATP6V1H/ATP6V1B2/ATP6V1G1/NDUFB9/ATP6V0A1/NDUFC2/NDUFS8/ATP6AP1/SDHB/SDHC/ATP6V1D/COX5A/NDUFB6/SDHD/ATP6V0B/NDUFB7/UQCRC1/CYC1/NDUFS7/NDUFA11/ATP6V0D1/ATP6V1F/COX7A2/COX8A/UQCRFS1/NDUFB3/NDUFB2/NDUFS1/MT-ND4/SDHA/NDUFA9/COX7B/COX6C/NDUFA10/NDUFV1/UQCRQ/MT-CO3/NDUFS4/NDUFB8/NDUFS2/NDUFA6/NDUFA8/UQCR11/COX17/COX5B/NDUFC1/ATP6V0A2/ATP6V1E1/NDUFA4/ATP6V…
lung	ACTIVATION OF MATRIX METALLOPROTEINASES	1.83271	0.000170007	MMP9/MMP7/CTSK/MMP14/FURIN/MMP8/MMP2/TIMP2/TIMP1/MMP10/MMP1
lung	FGF PATHWAY	1.74273	0.00251525	SPP1/MMP9/SDC2/SPRY2/CTTN/PLAU/RPS6KA1/FGFR1/STAT1/HGF/PLAUR/PDPK1/SSH1/PIK3R1/RUNX2/PTPN11/MAPK3
lung	ASSEMBLY OF COLLAGEN FIBRILS AND OTHER MULTIMERIC STRUCTURES	1.73483	0.00559898	MMP9/MMP7/CTSL/COL4A2/ITGA6/COL8A2/COL6A2/COL6A1/CTSB/LAMA3
lung	MITOCHONDRIAL TRANSLATION	1.73403	0.00173259	MRPL52/MRPL12/MRPS6/MRPS25/MRPS16/MRPS12/MRPS34/GADD45GIP1/MRPL17/MRPL54/MRPL3/MRPS7/MRPL21/MRPL23/MRPS23/MRPS28/AURKAIP1/MRPL20/MRPL24/MRPL51/MRPL15/MRPL37/GFM1/CHCHD1/MRPL40/MRPL41/MRPL35/MRPS10/MTRF1L/MRPL4/MRPL13/MRPL28/MRPS14/MRPL42/MRPL27/MRPL44/MRPS36/MRPL57/MRPL34/MRPL36/TUFM/MRPL53/MRPL47/ERAL1/MRPL39/MRPS5/OXA1L/MRPL19/MRPL50/MRPL22/MRPL11/MRPS30/PTCD3/MTIF2/MRPL38/GFM2/MRPL2/TSFM/MRPS2…
lung	SYNDECAN 1 PATHWAY	1.72722	0.00251525	MMP9/MMP7/COL8A2/COL6A2/COL6A1/CCL5/PPIB/HGF/MMP1/PRKACA/TGFB1/MAPK3/COL3A1/SDC1/COL1A2/COL13A1/COL1A1
lung	VIBRIO CHOLERAE INFECTION	1.7154	0.00559898	ATP6V0D2/ATP6V1A/PRKCB/ATP6V1C1/ERO1A/TCIRG1/PDIA4/ATP6V1H/ATP6V1B2/KDELR2/ATP6V1G1/ATP6V0A1/SEC61G/PRKX/ATP6AP1/ATP6V1D/ARF1/PRKCA/ATP6V0B/PRKACB/SEC61A1/SEC61B/ATP6V0D1/ATP6V1F/ACTG1/PRKACA/ADCY3/KDELR1
lung	DIGESTION AND ABSORPTION	1.71356	0.0157483	CHIT1/SLC2A5
lung	RESPIRATORY ELECTRON TRANSPORT	1.71347	0.00348138	NDUFS6/COX20/NDUFAB1/NDUFB9/NDUFC2/NDUFS8/SDHB/SDHC/COX5A/NDUFB6/SDHD/NDUFB7/UQCRC1/COX16/CYC1/NDUFS7/NDUFA11/COX8A/UQCRFS1/NDUFB3/NDUFB2/NDUFS1/MT-ND4/LRPPRC/NDUFAF3/TMEM126B/NDUFAF6/SDHA/NDUFA9/COX7B/COX6C/NDUFB11/NDUFA10/NDUFV1/UQCRQ/MT-CO3/NDUFS4/NDUFB8/NDUFA13/NDUFS2/NDUFA6/NDUFA8/UQCR11/SCO2/NDUFAF4/COX5B/TACO1/NDUFC1/ETFB/ETFA/SCO1/ACAD9/NDUFA4/NDUFA5/UQCRC2/NDUFA2/NDUFAF1/COX6A1/TRAP1/NDU…
lung	RESPIRATORY ELECTRON TRANSPORT ATP SYNTHESIS BY CHEMIOSMOTIC COUPLING AND HEAT PRODUCTION BY UNCOUPLING PROTEINS	1.71145	0.00251525	NDUFS6/COX20/NDUFAB1/UCP2/NDUFB9/NDUFC2/NDUFS8/SDHB/SDHC/COX5A/NDUFB6/SDHD/NDUFB7/UQCRC1/COX16/CYC1/NDUFS7/NDUFA11/COX8A/UQCRFS1/NDUFB3/NDUFB2/NDUFS1/MT-ND4/LRPPRC/NDUFAF3/TMEM126B/NDUFAF6/SDHA/NDUFA9/COX7B/COX6C/NDUFB11/NDUFA10/NDUFV1/UQCRQ/MT-CO3/NDUFS4/NDUFB8/NDUFA13/NDUFS2/NDUFA6/NDUFA8/UQCR11/SCO2/NDUFAF4/COX5B/TACO1/NDUFC1/ETFB/ETFA/SCO1/ACAD9/NDUFA4/NDUFA5/UQCRC2/NDUFA2/NDUFAF1/COX6A1/TRAP…
lung	LYSOSOME	1.70877	0.00241218	CTSK/LGMN/GM2A/ATP6V0D2/LIPA/ACP2/CTSL/NPC1/SCARB2/TCIRG1/AP1S2/GNPTAB/GBA/ATP6V1H/LAMP1/GNS/SMPD1/AP3S1/ATP6V0A1/GLA/CTSZ/CTSB/NPC2/TPP1/ATP6AP1/SLC17A5/CTSA/IGF2R/CD63/CLTC/M6PR/DNASE2B/GGA1/SGSH/ATP6V0B/GUSB/GALNS/AP1S3/AP1S1/SLC11A2/PPT1/ATP6V0D1/CTSD/AP3D1/AP1B1/NAGA/CLTB/CTSH/SORT1/CD164/NEU1/HEXB/PSAP/CD68/CLTA/GNPTG/CTNS
lung	INSULIN RECEPTOR RECYCLING	1.69741	0.0260759	ATP6V0D2/ATP6V1A/ATP6V1C1/TCIRG1/ATP6V1H/ATP6V1B2/ATP6V1G1/ATP6V0A1/ATP6AP1/ATP6V1D/ATP6V0B/ATP6V0D1/ATP6V1F
lung	GOLGI TO ER RETROGRADE TRANSPORT	1.62385	0.0157483	TUBA1C/SURF4/KDELR2/KIF1B/TUBA1B/TMED2/BICD1/TUBA1A/ARF1/GALNT1/COPZ1/TMED9/ARFGAP3/KIF22/CAPZB/KIF13B/STX18/COPG1/RACGAP1/RAB18/COPB2/TUBB6/ARF5/TMED10/TMED7/RAB1A/DYNLL1/DCTN4/KDELR1/KIF5B/COPE/DYNC1I2/ACTR1A/ARCN1/TMED3/KIF1C/NSF/RAB1B/ACTR10/DYNC1LI2/KIF21A/TUBA4A/DCTN1/RINT1/DCTN5/BICD2/ARFGAP1/CAPZA2/DCTN2/TUBB4B/ARFGAP2/RAB3GAP2/ARF3/TUBB2A/ARF4/KIF20B/KIF9/NAPA/KLC1/PAFAH1B2
lung	EXTRACELLULAR MATRIX ORGANIZATION	1.62191	0.000333914	SPP1/MMP9/MMP7/CTSK/A2M/SDC2/SPARC/COL22A1/HTRA1/SERPINE1/ITGB5/CTSL/ITGAM/COL4A2/MMP14/ITGA6/ADAM8/MMP12/COL8A2/COL6A2/ADAM9/COL6A1/ITGB2/FURIN/ITGAX/MMP8/APP/SDC3/MMP2/EMILIN1/P4HB/CTSB/ITGB3/CAPN2/ICAM1/ADAM10/SDC4/TIMP2/PRKCA/ACTN1/TIMP1/ADAM15/LAMA3/ITGA3/MMP19/ITGB1/ITGA5/MMP10/PLOD3/PPIB/CTSD/COLGALT1/PDGFA
lung	COPI DEPENDENT GOLGI TO ER RETROGRADE TRAFFIC	1.6194	0.0257164	TUBA1C/SURF4/KDELR2/KIF1B/TUBA1B/TMED2/TUBA1A/ARF1/COPZ1/TMED9/ARFGAP3/KIF22/KIF13B/STX18/COPG1/RACGAP1/COPB2/TUBB6/ARF5/TMED10/TMED7/RAB1A/KDELR1/KIF5B/COPE/ARCN1/TMED3/KIF1C/NSF/RAB1B/KIF21A/TUBA4A/RINT1/ARFGAP1/TUBB4B/ARFGAP2/ARF3/TUBB2A/ARF4/KIF20B/KIF9/NAPA/KLC1
lung	TRANSLATION	1.564	0.00559857	MRPL52/MRPL12/MRPS6/RPL22L1/SEC61G/MRPS25/SRPRB/RPN2/SPCS3/MRPS16/MRPS12/EIF3B/MRPS34/SSR3/EIF4G1/GADD45GIP1/MRPL17/MRPL54/MRPL3/MRPS7/MRPL21/IARS2/SEC61A1/MRPL23/SEC11C/RPN1/MRPS23/MRPS28/SEC61B/AURKAIP1/MRPL20/MRPL24/EIF1AX/SSR4/MRPL51/MRPL15/MRPL37/GFM1/EIF4A1/CHCHD1/SSR1/MRPL40/EIF4H/RPL26L1/MRPL41/MRPL35/SPCS2/EIF3I/MRPS10/SRP9/MTRF1L/EIF5B/MRPL4/EIF2S1/MRPL13/MRPL28/SRP19/FARSA/TRAM1/EEF1E1…
lung	THE CITRIC ACID TCA CYCLE AND RESPIRATORY ELECTRON TRANSPORT	1.50082	0.0402298	NDUFS6/ME2/COX20/NDUFAB1/UCP2/NDUFB9/NDUFC2/NDUFS8/SDHB/SDHC/COX5A/VDAC1/NDUFB6/SDHD/NDUFB7/UQCRC1/IDH2/COX16/CYC1/NDUFS7/PDHB/MPC2/DLAT/NDUFA11/COX8A/UQCRFS1/NDUFB3/NDUFB2/NDUFS1/MT-ND4/ACO2/LRPPRC/NDUFAF3/TMEM126B/NDUFAF6/SUCLA2/SDHA/NDUFA9/COX7B/COX6C/NDUFB11/SLC16A3/NDUFA10/NDUFV1/PDP1/DLST/UQCRQ/MT-CO3/NDUFS4/NDUFB8/NDUFA13/NDUFS2/NDUFA6/OGDH/NDUFA8/UQCR11/SCO2/FH/NDUFAF4/SLC16A1/MDH2/FAHD1/…
lung	INTRA GOLGI AND RETROGRADE GOLGI TO ER TRAFFIC	1.49458	0.0399171	RHOBTB3/CYTH4/TUBA1C/SURF4/KDELR2/KIF1B/TUBA1B/TMED2/BICD1/TUBA1A/IGF2R/ARF1/GALNT1/COPZ1/TMED9/YKT6/M6PR/ARFGAP3/KIF22/GOLIM4/CAPZB/SNAP29/NAA38/KIF13B/STX18/COPG1/RACGAP1/RAB18/ARL1/ARFRP1/COPB2/TUBB6/ARF5/TMED10/GOSR2/TMED7/SCOC/RAB1A/DYNLL1/DCTN4/KDELR1/KIF5B/COPE/DYNC1I2/ACTR1A/ARFIP2/PLIN3/ARCN1/TMED3/KIF1C/NSF/TMF1/RAB1B/ACTR10/DYNC1LI2/KIF21A/TRIP11/TUBA4A/VAMP3/DCTN1/COG2/MAN1A2/RINT1/DC…
lung	INTERFERON SIGNALING	-1.66139	0.00210799	PPM1B/NUP153/POM121C/POM121/PTPN2/IFIT5/ISG20/CAMK2G/RANBP2/IP6K2/PML/MX1/IFITM3/UBA7/IFNGR1/UBC/HLA-E/MID1/NUP107/IRF8/KPNA5/JAK2/FCGR1A/ARIH1/UBE2L6/GBP5/IRF1/TRIM38/TRIM5/CAMK2D/FCGR1B/DDX58/TRIM25/EGR1/TRIM26/HLA-C/IFIT3/HERC5/XAF1/EIF4A2/IFITM2/NUP98/IRF7/SOCS1/HLA-DRA/GBP1/GBP4/IFIT2/HLA-DRB1/TRIM14/GBP3/CIITA/HLA-DRB5/PIAS1/NUP214/GBP2/HLA-F/UBB/IFI27/HLA-DPB1/HLA-DPA1/HLA-DQB2/TRIM22/HLA-…
lung	SYSTEMIC LUPUS ERYTHEMATOSUS	-1.73244	0.0302913	TNF/FCGR1A/HLA-DMB/C2/C8B/CD80/ACTN4/HLA-DRA/HLA-DRB1/FCGR2A/HLA-DMA/HLA-DRB5/FCGR3A/HLA-DPB1/HLA-DOA/HLA-DPA1/HLA-DQB1/HLA-DQA1/HLA-DQA2/C1QB/C1QA/C1QC
lung	ASTHMA	-1.77305	0.0402298	TNF/HLA-DMB/HLA-DRA/HLA-DRB1/HLA-DMA/HLA-DRB5/HLA-DPB1/HLA-DOA/HLA-DPA1/HLA-DQB1/HLA-DQA1/HLA-DQA2
lung	INTESTINAL IMMUNE NETWORK FOR IGA PRODUCTION	-1.80476	0.0322485	IL6/HLA-DMB/ICOS/CXCR4/CD80/HLA-DRA/HLA-DRB1/IL15/HLA-DMA/HLA-DRB5/HLA-DPB1/HLA-DOA/HLA-DPA1/HLA-DQB1/HLA-DQA1/HLA-DQA2
lung	ALLOGRAFT REJECTION	-1.81133	0.0157483	CD86/HLA-E/TNF/HLA-DMB/HLA-C/CD80/HLA-DRA/HLA-DRB1/HLA-DMA/HLA-DRB5/HLA-F/HLA-DPB1/HLA-DOA/HLA-DPA1/HLA-DQB1/HLA-DQA1/HLA-DQA2
lung	GENERATION OF SECOND MESSENGER MOLECULES	-1.82901	0.00911547	CD3D/VASP/WAS/EVL/HLA-DRA/HLA-DRB1/HLA-DRB5/HLA-DPB1/CD101/HLA-DPA1/HLA-DQB2/HLA-DQB1/HLA-DQA1/HLA-DQA2
lung	AUTOIMMUNE THYROID DISEASE	-1.87213	0.0118824	HLA-DMB/TG/HLA-C/CD80/HLA-DRA/HLA-DRB1/HLA-DMA/HLA-DRB5/HLA-F/HLA-DPB1/HLA-DOA/HLA-DPA1/HLA-DQB1/HLA-DQA1/HLA-DQA2
lung	INTERFERON GAMMA SIGNALING	-1.96353	0.000472503	PML/IFNGR1/HLA-E/MID1/IRF8/JAK2/FCGR1A/GBP5/IRF1/TRIM38/TRIM5/CAMK2D/FCGR1B/TRIM25/TRIM26/HLA-C/IRF7/SOCS1/HLA-DRA/GBP1/GBP4/HLA-DRB1/TRIM14/GBP3/CIITA/HLA-DRB5/PIAS1/GBP2/HLA-F/HLA-DPB1/HLA-DPA1/HLA-DQB2/TRIM22/HLA-DQB1/HLA-DQA1/HLA-DQA2/OASL
lung	GRAFT VERSUS HOST DISEASE	-2.01238	0.000525224	CD86/HLA-E/TNF/IL6/HLA-DMB/HLA-C/CD80/HLA-DRA/HLA-DRB1/HLA-DMA/HLA-DRB5/HLA-F/HLA-DPB1/HLA-DOA/HLA-DPA1/IL1B/IL1A/HLA-DQB1/HLA-DQA1/HLA-DQA2
lung	TYPE I DIABETES MELLITUS	-2.0377	0.000170007	CD86/HLA-E/TNF/HLA-DMB/HLA-C/CD80/HLA-DRA/HLA-DRB1/HLA-DMA/HLA-DRB5/HLA-F/HLA-DPB1/HLA-DOA/HLA-DPA1/IL1B/IL1A/HLA-DQB1/HLA-DQA1/HLA-DQA2/CPE
heart	DEGRADATION OF THE EXTRACELLULAR MATRIX	1.95255	4.29e-08	SPP1/FN1/CTSD/A2M/MMP19/BSG/MMP9/ADAM9/TIMP2/CTSB/CTSK/CAPN2/CTSL/ADAM15/CAPN1/MMP14/CAPNS1/HTRA1/MMP7/NCSTN/ADAM10/ADAM17
heart	LYSOSOME	1.84559	3.30749e-07	ACP5/LIPA/CTSD/LGMN/CD68/HEXB/GUSB/LAMP1/SCARB2/CD63/ATP6AP1/CTSA/AP3S1/CTSZ/PPT1/DNASE2B/CTSB/ATP6V0A1/CTSH/LAMP2/CTSK/PLA2G15/DNASE2/HEXA/LAPTM4A/CTSL/SORT1/FUCA1/GAA/GGA1/ASAH1/CLTA/AP1S1/NPC2/GM2A/SLC17A5/CD164/MCOLN1/ATP6V0B/TCIRG1/GNPTG/ACP2/M6PR/GLB1/ATP6V1H/CLN5/NPC1/IGF2R/CTSF
heart	PPAR SIGNALING PATHWAY	1.84344	7.00658e-05	FABP5/LPL/FABP4/CYP27A1/FABP3/CD36/DBI/PPARG/ILK
heart	SCAVENGING BY CLASS A RECEPTORS	1.82423	0.000842358	APOE/MSR1/MARCO/CALR/HSP90B1
heart	RESPIRATORY ELECTRON TRANSPORT	1.82172	3.75023e-06	COX20/NDUFB2/COX5A/NDUFC2/NDUFA6/NDUFS5/NDUFB7/NDUFAF3/NDUFA4/SDHD/COX5B/NDUFA5/NDUFB9/UQCRC1/TMEM126B/NDUFA8/SDHC/UQCR11/NDUFB4/COX6A1/NDUFC1/NDUFAB1/NDUFB6/NDUFS6/COX16/NDUFAF4/NDUFS8/COX6C/ETFA/NDUFB10/NDUFA12/COX7B/NDUFV2/SDHA/SDHB/NDUFB8/NDUFB3/NDUFA1/NDUFA11/NDUFS7/UQCRC2/NDUFV3/NDUFA9/COX8A/NDUFA13/NDUFS3/SURF1/UQCRQ/TRAP1/UQCR10/NDUFAF2/NDUFS2/NDUFV1/COX11/ETFB/ACAD9/NDUFA3/NDUFS4/CYC1/ND…
heart	COLLAGEN DEGRADATION	1.8179	0.000256238	CTSD/MMP19/MMP9/ADAM9/CTSB/CTSK/CTSL/MMP14/MMP7/ADAM10/ADAM17
heart	MITOCHONDRIAL TRANSLATION	1.81295	8.95012e-06	GADD45GIP1/MRPL51/MRPL57/MRPL40/MRPL34/MRPL17/MRPL41/MRPL54/MRPL24/MRPL23/MRPL11/MRPL12/MRPL27/MRPS15/MRPL22/MRPS18B/MRPL15/CHCHD1/MRPS7/MRPS12/MRPL36/MRPS16/AURKAIP1/MRPL14/MRPS36/MRPL52/MRPS14/MRPS28/MRPS23/MRPS26/MRPS34/MRPL50/MRPL43/MRPL20/MRPS18C/MRPL28/MRPL4/MRPL13/TUFM/MRPS11/MRPS21/MRPS22/MRPS18A/MRPL39/MRPL32/MRPL47/MRPS25/MRPL9/MRPL1/MRPS35/MRPL10/MRPS6/MRPL37/MTIF3/MRPL16/MRPL58/MRPS10…
heart	OXIDATIVE PHOSPHORYLATION	1.80867	2.40975e-06	ATP6V1F/ATP6AP1/ATP6V0A1/NDUFB2/COX5A/NDUFC2/NDUFA6/ATP6V1D/NDUFS5/NDUFB7/ATP6V0E1/NDUFA4/SDHD/COX5B/NDUFA5/NDUFB9/UQCRC1/NDUFA8/ATP6V0B/SDHC/UQCR11/TCIRG1/NDUFB4/COX6A1/NDUFC1/NDUFAB1/NDUFB6/NDUFS6/NDUFS8/ATP6V1H/COX7A2/COX6C/NDUFB10/COX7B/NDUFV2/SDHA/SDHB/NDUFB8/NDUFB3/NDUFA1/NDUFA11/ATP6V1E1/NDUFS7/UQCRC2/NDUFV3/NDUFA9/COX8A/NDUFS3/UQCRQ/ATP6V1G1/UQCR10/NDUFS2/NDUFV1/COX11/NDUFA3/NDUFS4/CYC1/N…
heart	RESPIRATORY ELECTRON TRANSPORT ATP SYNTHESIS BY CHEMIOSMOTIC COUPLING AND HEAT PRODUCTION BY UNCOUPLING PROTEINS	1.80813	2.02561e-06	COX20/NDUFB2/COX5A/NDUFC2/NDUFA6/NDUFS5/NDUFB7/UCP2/NDUFAF3/NDUFA4/SDHD/COX5B/NDUFA5/NDUFB9/UQCRC1/TMEM126B/NDUFA8/SDHC/UQCR11/NDUFB4/COX6A1/NDUFC1/NDUFAB1/NDUFB6/NDUFS6/COX16/NDUFAF4/NDUFS8/COX6C/ETFA/NDUFB10/NDUFA12/COX7B/NDUFV2/SDHA/SDHB/NDUFB8/NDUFB3/NDUFA1/NDUFA11/NDUFS7/UQCRC2/NDUFV3/NDUFA9/COX8A/NDUFA13/NDUFS3/SURF1/UQCRQ/TRAP1/UQCR10/NDUFAF2/NDUFS2/NDUFV1/COX11/ETFB/ACAD9/NDUFA3/NDUFS4/CY…
heart	THE CITRIC ACID TCA CYCLE AND RESPIRATORY ELECTRON TRANSPORT	1.79918	5.12238e-08	VDAC1/BSG/COX20/MPC2/NDUFB2/PDK4/COX5A/NDUFC2/NDUFA6/GLO1/NDUFS5/MPC1/NDUFB7/UCP2/NDUFAF3/NDUFA4/SDHD/SLC16A3/COX5B/NDUFA5/NDUFB9/UQCRC1/TMEM126B/NDUFA8/SDHC/UQCR11/NDUFB4/COX6A1/NDUFC1/NDUFAB1/NDUFB6/NDUFS6/COX16/LDHA/NDUFAF4/IDH2/NDUFS8/COX6C/ETFA/NDUFB10/NDUFA12/COX7B/NDUFV2/FAHD1/SDHA/MDH2/SDHB/NDUFB8/NDUFB3/NDUFA1/NDUFA11/SUCLG1/ME3/NDUFS7/PDHB/UQCRC2/NDUFV3/NDUFA9/DLD/HAGH/COX8A/NDUFA13/NDU…
heart	METABOLISM OF FAT SOLUBLE VITAMINS	1.79654	0.00089799	APOE/LPL/SDC2/VKORC1/SDC4/LRP1/GPC4/LRP10/RDH11
heart	PLASMA LIPOPROTEIN ASSEMBLY REMODELING AND CLEARANCE	1.7897	0.000663889	APOE/APOC1/LPL/LIPA/A2M/P4HB/AP2M1/NCEH1/AP2S1/CLTA/AP2A2/NPC2/PRKACB/LMF2/NPC1/NR1H3/SOAT1/HDLBP
heart	COMPLEX I BIOGENESIS	1.78288	0.000337859	NDUFB2/NDUFC2/NDUFA6/NDUFS5/NDUFB7/NDUFAF3/NDUFA5/NDUFB9/TMEM126B/NDUFA8/NDUFB4/NDUFC1/NDUFAB1/NDUFB6/NDUFS6/NDUFAF4/NDUFS8/NDUFB10/NDUFA12/NDUFV2/NDUFB8/NDUFB3/NDUFA1/NDUFA11/NDUFS7/NDUFV3/NDUFA9/NDUFA13/NDUFS3/NDUFAF2/NDUFS2/NDUFV1/ACAD9/NDUFA3/NDUFS4/NDUFA2/NDUFB11/TIMMDC1/NDUFAF1
heart	MHC CLASS II ANTIGEN PRESENTATION	1.78059	1.216e-05	CTSD/LGMN/TUBB6/CTSA/TUBA1A/AP2M1/CTSB/CTSH/TUBA1B/CTSK/DYNLL1/DCTN2/HLA-DMB/TUBA1C/CAPZB/CTSL/AP2S1/CLTA/AP1S1/CAPZA2/AP2A2/HLA-DMA/CANX/ARF1/ACTR1B/RAB7A/RILP/DYNC1I2/KIF22/ACTR10/HLA-DQB1/CTSF/DCTN3/ACTR1A/OSBPL1A/SEC23A/TUBB2A/CAPZA1/HLA-DPA1/DCTN1/HLA-DRB1/DYNC1LI2/SEC13/HLA-DOA/AP2B1/HLA-DPB1/HLA-DQA2
heart	CELL JUNCTION ORGANIZATION	1.78008	0.00057464	CD151/ACTN1/FLNA/PARVB/ILK/RSU1/CLDN7/FERMT2/ACTG1/ITGB1/CADM1/ANG/DST/CTNNA1/PLEC/LIMS1
heart	BINDING AND UPTAKE OF LIGANDS BY SCAVENGER RECEPTORS	1.76426	0.00057464	APOE/CD36/MSR1/MARCO/CALR/SPARC/LRP1/HSP90B1
heart	RECYCLING PATHWAY OF L1	1.74556	0.00301396	TUBB6/TUBA1A/AP2M1/RDX/TUBA1B/RPS6KA2/TUBA1C/ACTG1/AP2S1/CLTA/SHTN1/AP2A2/MSN/DPYSL2/RPS6KA1/TUBB2A/ACTB/AP2B1
heart	L1CAM INTERACTIONS	1.74528	7.00658e-05	ALCAM/TUBB6/TUBA1A/AP2M1/RDX/TUBA1B/RPS6KA2/TUBA1C/ACTG1/AP2S1/CLTA/SHTN1/AP2A2/ITGB1/CSNK2B/MSN/DPYSL2/SPTAN1/NRP2/LYPLA2/NRP1/RPS6KA1/TUBB2A/ACTB/SCN9A/SDCBP/AP2B1/CSNK2A2/ITGAV/MAP2K2/RAC1
heart	PLASMA LIPOPROTEIN CLEARANCE	1.74504	0.00704233	APOE/APOC1/LIPA/AP2M1/NCEH1/AP2S1/CLTA/AP2A2/NPC2/NPC1/NR1H3/SOAT1/HDLBP/AP2B1/NR1H2
heart	SENSORY PERCEPTION	1.74449	2.01762e-05	APOE/LPL/SDC2/DHRS9/GSN/MPP1/TWF2/DHRS3/RDX/CAPZB/ACTG1/SDC4/CALM1/LRP1/CAPZA2/GPC4/MSN/LRP10/SPTAN1/EPS8/MYH9/RDH11/METAP2/KCNMB1/EPB41L1/CAPZA1/ACTB/SCN9A/GNB1/METAP1/FNTA/KCNMA1/NMT1
heart	HUNTINGTONS DISEASE	1.73947	3.75023e-06	VDAC1/PPARG/AP2M1/NDUFB2/DCTN2/COX5A/POLR2E/NDUFC2/POLR2L/NDUFA6/NDUFS5/NDUFB7/AP2S1/CLTA/NDUFA4/AP2A2/SDHD/POLR2I/TGM2/SOD1/COX5B/NDUFA5/NDUFB9/UQCRC1/NDUFA8/SDHC/UQCR11/NDUFB4/COX6A1/VDAC3/NDUFC1/NDUFAB1/NDUFB6/POLR2F/NDUFS6/NDUFS8/POLR2J/COX7A2/POLR2K/COX6C/NDUFB10/CREB3L2/COX7B/NDUFV2/VDAC2/SDHA/SDHB/NDUFB8/NDUFB3/NDUFA1/NDUFS7/POLR2C/UQCRC2/NDUFV3/NDUFA9/COX8A/NDUFS3/HDAC2/UQCRQ/DCTN1/PPID/B…
heart	CELL EXTRACELLULAR MATRIX INTERACTIONS	1.73554	0.00662745	ACTN1/FLNA/PARVB/ILK/RSU1/FERMT2/ACTG1/ITGB1/LIMS1/ACTB/TESK1
heart	TRIGLYCERIDE CATABOLISM	1.73543	0.00701321	FABP5/FABP4/MGLL/FABP3/PPP1CA/PRKACB
heart	SYNTHESIS OF BILE ACIDS AND BILE SALTS VIA 24 HYDROXYCHOLESTEROL	1.72591	0.00622475	CYP27A1/HSD3B7
heart	EPH EPHRIN SIGNALING	1.72329	0.000701508	SDC2/MMP9/AP2M1/ACTR3/ACTG1/AP2S1/CLTA/MYL6/AP2A2/HRAS/ARPC5/PSENEN/MYL12B/RASA1/ARPC4/RHOA/MYH9/APH1A/LIMK1/CFL1/NCSTN/ADAM10/EFNB1/ARPC2/MYL9/ACTB/PSEN2/MYL12A/APH1B/SDCBP/AP2B1/PAK2/CLTB/ITSN1/ARPC3/RAC1
heart	TRIGLYCERIDE METABOLISM	1.72018	0.00801011	FABP5/FABP4/MGLL/FABP3/PPP1CA/PRKACB
heart	VISUAL PHOTOTRANSDUCTION	1.71863	0.000789325	APOE/LPL/SDC2/DHRS9/DHRS3/SDC4/CALM1/LRP1/GPC4/LRP10/RDH11/METAP2
heart	RA BIOSYNTHESIS PATHWAY	1.71249	0.00929055	DHRS9/ALDH1A1/DHRS3/ALDH1A2/DHRS4/RDH11
heart	TRAFFICKING AND PROCESSING OF ENDOSOMAL TLR	1.70882	0.00824929	LGMN/CTSB/CTSK/CTSL/HSP90B1/UNC93B1
heart	PLASMA LIPOPROTEIN REMODELING	1.70554	0.00929055	APOE/LPL/P4HB
heart	SMOOTH MUSCLE CONTRACTION	1.69777	0.00801011	ANXA2/TPM4/ITGB5/SORBS3/CALM1/MYL6/MYL12B/ANXA1/ANXA6/TPM3/MYL9/MYL12A/PAK2
heart	RETINOL METABOLISM	1.69724	0.0104752	DHRS9/ALDH1A1/DHRS3/ALDH1A2/DHRS4/ADH5/RDH11/DHRS4L2
heart	FORMATION OF TUBULIN FOLDING INTERMEDIATES BY CCT TRIC	1.69523	0.0128056	TUBB6/TUBA1A/TUBA1B/TUBA1C/CCT7/CCT2/CCT5/CCT3/CCT4/TUBB2A/CCT6A/CCT8
heart	PYRUVATE METABOLISM	1.69345	0.0130345	VDAC1/BSG/MPC2/PDK4/GLO1/MPC1/SLC16A3/LDHA/PDHB/DLD/HAGH/PDP1/PDHA1
heart	SIGNALING BY RETINOIC ACID	1.69204	0.00814046	FABP5/DHRS9/ALDH1A1/DHRS3/PDK4/ALDH1A2/DHRS4/RDH11/PDHB/DLD/PDHA1
heart	PARKINSONS DISEASE	1.68455	0.000246893	VDAC1/NDUFB2/COX5A/NDUFC2/NDUFA6/NDUFS5/NDUFB7/SNCA/NDUFA4/SDHD/COX5B/NDUFA5/NDUFB9/UQCRC1/NDUFA8/SDHC/UQCR11/NDUFB4/COX6A1/VDAC3/NDUFC1/NDUFAB1/NDUFB6/NDUFS6/NDUFS8/COX7A2/COX6C/NDUFB10/COX7B/NDUFV2/VDAC2/SDHA/SDHB/NDUFB8/NDUFB3/NDUFA1/UBE2L3/NDUFS7/UQCRC2/NDUFV3/NDUFA9/COX8A/NDUFS3/PARK7/UBE2G1/UQCRQ/PPID/UQCR10/NDUFS2/NDUFV1/UBE2J1/NDUFA3/NDUFS4/PINK1/CYC1/NDUFA2/UBE2J2/HTRA2
heart	SENSORY PROCESSING OF SOUND BY OUTER HAIR CELLS OF THE COCHLEA	1.68041	0.00696662	GSN/MPP1/TWF2/RDX/ACTG1/MSN/SPTAN1/EPS8/MYH9/KCNMB1/EPB41L1/ACTB/KCNMA1/MYO1C
heart	PLASMA LIPOPROTEIN ASSEMBLY	1.67865	0.0130345	APOE/APOC1/A2M/P4HB/PRKACB
heart	COOPERATION OF PREFOLDIN AND TRIC CCT IN ACTIN AND TUBULIN FOLDING	1.67861	0.0130345	TUBB6/TUBA1A/TUBA1B/TUBA1C/CCT7/CCT2/CCT5/VBP1/PFDN6/CCT3/CCT4/TUBB2A/CCT6A/CCT8/ACTB/PFDN2
heart	METABOLISM OF ANGIOTENSINOGEN TO ANGIOTENSINS	1.64943	0.0162605	CTSD/ATP6AP2/CTSZ/ANPEP/ACE
heart	PYRUVATE METABOLISM	1.64729	0.0156067	MDH1/PKM/GRHPR/AKR1B1/GLO1/ACAT1/ALDH3A2/HAGHL/LDHA/PC/MDH2/PCK2/ME3/PDHB/DLD/HAGH/ACYP1/PDHA1/ACAT2/ALDH9A1
heart	ALZHEIMERS DISEASE	1.64648	0.000213394	APOE/LPL/CALM3/NDUFB2/COX5A/NDUFC2/CAPN2/NDUFA6/NDUFS5/NDUFB7/SNCA/CALM1/LRP1/NDUFA4/SDHD/COX5B/NDUFA5/NDUFB9/UQCRC1/PSENEN/NDUFA8/SDHC/UQCR11/NDUFB4/COX6A1/NDUFC1/NDUFAB1/NDUFB6/NDUFS6/CAPN1/NDUFS8/COX7A2/COX6C/NDUFB10/COX7B/NDUFV2/APH1A/BAD/SDHA/SDHB/NDUFB8/NDUFB3/NDUFA1/NCSTN/NDUFS7/UQCRC2/NDUFV3/NDUFA9/COX8A/NDUFS3/ADAM10/ADAM17/CALM2/UQCRQ/PSEN2/UQCR10/PLCB3/NDUFS2/NDUFV1/HSD17B10/NDUFA3/NDU…
heart	PYRUVATE METABOLISM AND CITRIC ACID TCA CYCLE	1.64257	0.0128865	VDAC1/BSG/MPC2/PDK4/GLO1/MPC1/SDHD/SLC16A3/SDHC/LDHA/IDH2/FAHD1/SDHA/MDH2/SDHB/SUCLG1/ME3/PDHB/DLD/HAGH/PDP1/PDHA1/IDH3G/IDH3B/DLST/NNT/ME2/SUCLA2/ACO2/DLAT
heart	VIBRIO CHOLERAE INFECTION	1.64196	0.00886537	ATP6V1F/ATP6AP1/ATP6V0A1/PDIA4/KDELR2/GNAS/ATP6V1D/ACTG1/ATP6V0E1/KDELR1/ARF1/PRKACB/ATP6V0B/TCIRG1/ATP6V1H/SEC61G/ATP6V1E1/SEC61B/PRKX/ACTB/ATP6V1G1
heart	METABOLISM OF STEROID HORMONES	1.64057	0.0159134	SRD5A3/FDX1/AKR1B1/FDX2/STARD3/HSD17B14/TSPO/HSD17B12/HSD17B11
heart	COPI INDEPENDENT GOLGI TO ER RETROGRADE TRAFFIC	1.63858	0.0146647	TUBB6/TUBA1A/TUBA1B/DYNLL1/DCTN2/TUBA1C/CAPZB/CAPZA2/RAB6A/DYNC1I2/ACTR10/DCTN3/ACTR1A/TUBB2A/CAPZA1/PAFAH1B2/DCTN1/RAB18/DYNC1LI2/PAFAH1B3/DCTN6/GALNT1/RAB3GAP2/RAB3GAP1
heart	BIOCARTA MCALPAIN PATHWAY	1.6369	0.0202821	CAPN2/HRAS/PRKAR1B/ITGB1/PRKACB/CAPN1/PRKAR1A/CAPNS1
heart	ASSEMBLY OF COLLAGEN FIBRILS AND OTHER MULTIMERIC STRUCTURES	1.63312	0.0136046	CD151/MMP9/CTSB/CTSL/DST/PLEC/MMP7
heart	HEDGEHOG LIGAND BIOGENESIS	1.63184	0.00929055	P4HB/PSMD8/PSMB6/PSMC3/PSMD14/PSMC4/PSMA7/SEM1/PSMB1/DERL2/PSMD7/PSMB5/VCP/PSMD3/PSMF1/PSMC1/PSMC5/PSMD9/PSMC6/PSMB3/PSMC2/PSMB7/OS9/PSMA3/ADAM17/PSMD2/PSMD1/PSMB2/PSMD10/PSMD4/PSMA6/ERLEC1/PSMA2/PSMD13/PSME3/PSMA1/PSMA5
heart	MET ACTIVATES PTK2 SIGNALING	1.62916	0.0281114	FN1/HGF/ITGB1
heart	GOLGI TO ER RETROGRADE TRANSPORT	1.62748	0.00111319	TMED9/TUBB6/TUBA1A/TMED2/TMED10/TUBA1B/DYNLL1/DCTN2/TUBA1C/KIF1B/KDELR2/CAPZB/COPZ1/KDELR1/CAPZA2/ARF1/RAB6A/ARF5/DYNC1I2/ARF3/SURF4/KIF22/ACTR10/RAB1A/ARFGAP3/DCTN3/ACTR1A/COPE/TUBB2A/CAPZA1/COPG1/PAFAH1B2/DCTN1/RAB18/DYNC1LI2/TMED3/STX18/TMED7/PAFAH1B3/DCTN6/ARFGAP2/GALNT1
heart	PRIMARY BILE ACID BIOSYNTHESIS	1.62668	0.0239226	CYP27A1/HSD3B7/HSD17B4/SCP2
heart	SENSORY PROCESSING OF SOUND	1.62244	0.0115768	GSN/MPP1/TWF2/RDX/CAPZB/ACTG1/CAPZA2/MSN/SPTAN1/EPS8/MYH9/KCNMB1/EPB41L1/CAPZA1/ACTB/KCNMA1
heart	DEFECTIVE CFTR CAUSES CYSTIC FIBROSIS	1.61901	0.0144998	PSMD8/PSMB6/PSMC3/PSMD14/PSMC4/PSMA7/DERL1/RNF5/SEM1/PSMB1/DERL2/PSMD7/PSMB5/VCP/PSMD3/PSMF1/PSMC1/PSMC5/PSMD9/PSMC6/PSMB3/PSMC2/PSMB7/OS9/PSMA3/PSMD2/PSMD1/PSMB2/PSMD10/PSMD4/PSMA6/ERLEC1/PSMA2/PSMD13/PSME3/PSMA1/PSMA5
heart	ABC TRANSPORTER DISORDERS	1.61673	0.00814046	PSMD8/PSMB6/PSMC3/PSMD14/PSMC4/PSMA7/DERL1/RNF5/SEM1/PSMB1/DERL2/PSMD7/ABCD4/PSMB5/VCP/PSMD3/PSMF1/PSMC1/PSMC5/PSMD9/PSMC6/PSMB3/PSMC2/PSMB7/LMBRD1/OS9/PSMA3/PSMD2/PSMD1/PSMB2/PSMD10/PSMD4/PSMA6/ERLEC1/PSMA2/PSMD13/PSME3/PSMA1/PSMA5
heart	NEGATIVE REGULATION OF NOTCH4 SIGNALING	1.61633	0.0130345	PSMD8/PSMB6/PSMC3/PSMD14/PSMC4/PSMA7/SEM1/PSMB1/PSMD7/PSMB5/PSMD3/PSMF1/AKT1/RBX1/PSMC1/PSMC5/PSMD9/PSMC6/PSMB3/SKP1/PSMC2/PSMB7/PSMA3/PSMD2/PSMD1/PSMB2/PSMD10/PSMD4/PSMA6/PSMA2/PSMD13/PSME3/YWHAZ/PSMA1/PSMA5
heart	PCP CE PATHWAY	1.61555	0.00590003	AP2M1/PSMD8/PSMB6/PSMC3/PSMD14/PSMC4/PSMA7/AP2S1/SEM1/PSMB1/CLTA/AP2A2/PSMD7/PSMB5/PSMD3/PSMF1/ARRB2/PSMC1/PSMC5/PSMD9/PSMC6/RHOA/PSMB3/DAAM1/FZD1/PSMC2/PSMB7/PSMA3/PSMD2/PSMD1/PSMB2/PSMD10/PSMD4/PSMA6/PSMA2/RYK/PFN1/AP2B1/PSMD13/PSME3/CLTB/PSMA1/RAC1/PSMA5
heart	TRANSLOCATION OF SLC2A4 GLUT4 TO THE PLASMA MEMBRANE	1.60971	0.00952675	RAB13/TUBB6/YWHAQ/TUBA1A/YWHAH/TUBA1B/RALA/TUBA1C/ACTG1/CALM1/STX4/RAB11A/RAB4A/AKT1/TBC1D1/YWHAE/MYH9/PRKAG1/RAB14/TUBB2A/EXOC5/RAB10/YWHAG/ACTB/RAB8A/MYO5A/YWHAZ/RAC1/MYO1C/EXOC4/AKT2
heart	COPI MEDIATED ANTEROGRADE TRANSPORT	1.60525	0.00622475	TMED9/TUBB6/CD59/TUBA1A/TMED2/TMED10/TUBA1B/DYNLL1/DCTN2/TUBA1C/KDELR2/CAPZB/COPZ1/KDELR1/CAPZA2/ARF1/ARF5/DYNC1I2/ARF3/SPTAN1/ACTR10/RAB1A/YKT6/ARFGAP3/DCTN3/ACTR1A/COPE/TUBB2A/USO1/CAPZA1/COPG1/TMEM115/DCTN1/DYNC1LI2/TMED3/TMED7
heart	TRANSFERRIN ENDOCYTOSIS AND RECYCLING	1.6026	0.0379136	ATP6V1F/ATP6AP1/ATP6V0A1/ATP6V1D/ATP6V0E1/MCOLN1/ATP6V0B/TCIRG1/ATP6V1H/STEAP3/ATP6V1E1/ATP6V1G1
heart	CITRATE CYCLE TCA CYCLE	1.59561	0.0411705	MDH1/SDHD/SDHC/IDH1/IDH2/PC/SDHA/MDH2/SDHB/PCK2/SUCLG1/PDHB/DLD/PDHA1/IDH3G/IDH3B/ACLY/DLST/SUCLA2/ACO2/DLAT
heart	GLYCOLYSIS GLUCONEOGENESIS	1.59373	0.0274937	FBP1/GALM/PFKP/PKM/ENO1/AKR1A1/ALDH3A2/LDHA/ADH5/PFKL/PGAM1/PCK2/PDHB/DLD/GPI/PDHA1/PGM2/ALDH9A1/ALDH3B1/PGK1/ALDOA
heart	HEDGEHOG OFF STATE	1.59345	0.00701321	TUBB6/TUBA1A/TUBA1B/PSMD8/TUBA1C/PSMB6/GNAS/PSMC3/PSMD14/PSMC4/PSMA7/SEM1/PSMB1/PSMD7/PRKAR1B/PSMB5/PSMD3/PRKACB/PSMF1/RBX1/PSMC1/PRKAR1A/PSMC5/PSMD9/PSMC6/PSMB3/SKP1/PSMC2/PSMB7/PSMA3/TUBB2A/PSMD2/PSMD1/PSMB2/PSMD10/PSMD4/PSMA6/PSMA2/PSMD13/PSME3/PSMA1/PSMA5
heart	GLUTATHIONE METABOLISM	1.59317	0.0263644	MGST3/GSTO1/SMS/GPX3/GPX4/GGCT/ANPEP/GCLC/SRM/IDH1/TXNDC12/IDH2
heart	DEGRADATION OF GLI1 BY THE PROTEASOME	1.59266	0.0128056	PSMD8/PSMB6/PSMC3/PSMD14/PSMC4/PSMA7/SEM1/PSMB1/PSMD7/PSMB5/PSMD3/PRKACB/PSMF1/RBX1/PSMC1/PSMC5/PSMD9/PSMC6/PSMB3/SKP1/PSMC2/PSMB7/PSMA3/PSMD2/PSMD1/PSMB2/PSMD10/PSMD4/PSMA6/PSMA2/PSMD13/PSME3/PSMA1/PSMA5
heart	ECM RECEPTOR INTERACTION	1.59133	0.0189689	SPP1/FN1/SDC2/CD36/ITGB5/SDC4/ITGB1/CD47
heart	SIGNALING BY HEDGEHOG	1.59094	0.00111319	TUBB6/TUBA1A/P4HB/TUBA1B/PSMD8/TUBA1C/PSMB6/GNAS/PSMC3/PSMD14/PSMC4/PSMA7/SEM1/PSMB1/DERL2/PSMD7/PRKAR1B/PSMB5/VCP/PSMD3/PRKACB/PSMF1/RBX1/ARRB2/PSMC1/PRKAR1A/PSMC5/PSMD9/PSMC6/PSMB3/SKP1/PSMC2/PSMB7/OS9/PSMA3/TUBB2A/ADAM17/PSMD2/PSMD1/PSMB2/PSMD10/PSMD4/PSMA6/ERLEC1/PSMA2/PSMD13/PSME3/CDC73/PSMA1/PSMA5
heart	INTERCONVERSION OF NUCLEOTIDE DI AND TRIPHOSPHATES	1.58774	0.0443839	NME1/TXN/DCTPP1/CMPK1/NME2/GUK1/DTYMK/NME4/AK6/DCTD/DUT/RRM1/AK2/TXNRD1
heart	BIOCARTA PROTEASOME PATHWAY	1.58459	0.0417337	RPN1/PSMB6/PSMA7/PSMB1/PSMB5/PSMB3/RPN2/PSMB7/PSMA3/PSMB2/PSMA6/UBE2A/PSMA2/PSMA1/PSMA5/PSMB4/UBE3A
heart	COLLAGEN FORMATION	1.58401	0.0159134	CD151/MMP9/P4HB/PPIB/CTSB/PLOD3/CTSL/DST/PLEC/MMP7/SERPINH1/COLGALT1/COL22A1
heart	COPI DEPENDENT GOLGI TO ER RETROGRADE TRAFFIC	1.58397	0.00704233	TMED9/TUBB6/TUBA1A/TMED2/TMED10/TUBA1B/TUBA1C/KIF1B/KDELR2/COPZ1/KDELR1/ARF1/ARF5/ARF3/SURF4/KIF22/RAB1A/ARFGAP3/COPE/TUBB2A/COPG1/TMED3/STX18/TMED7
heart	GLYCOSPHINGOLIBIOSYNTHESIS GANGLIO SERIES	1.5814	0.0342326	HEXB/HEXA/GLB1/ST3GAL5/ST6GALNAC6/ST3GAL2/ST6GALNAC4/B3GALT4/SLC33A1
heart	CELL CELL COMMUNICATION	1.57996	0.00770266	CD151/ACTN1/FLNA/PARVB/ILK/RSU1/CLDN7/SIRPA/FERMT2/ACTG1/ITGB1/CD47/CADM1/ANG/SPTAN1/DST/CTNNA1/PLEC/LIMS1/NCK1/PTPN6/ACTB/TESK1/PIK3R1
heart	PROTEASOME	1.578	0.0335539	PSMD8/PSMB6/PSMC3/PSMD14/PSMC4/PSMA7/SEM1/PSMB1/PSMD7/PSMB5/PSMD3/PSMF1/PSMC1/PSMC5/PSMC6/PSMB3/PSMC2/PSMB7/PSMA3/PSMD2/POMP/PSMD1/PSMB2/PSMD4/PSMA6/PSMA2/PSMD13/PSME3/PSMA1/PSMA5
heart	RENIN ANGIOTENSIN SYSTEM	1.57731	0.035571	CTSA/ANPEP/ACE/NLN/THOP1
heart	FOLDING OF ACTIN BY CCT TRIC	1.57668	0.0373918	CCT7/CCT2/CCT5/CCT3/CCT4/CCT6A/CCT8/ACTB
heart	SYNTHESIS OF SUBSTRATES IN N GLYCAN BIOSYTHESIS	1.57055	0.0209909	SRD5A3/NPL/CTSA/FUOM/AMDHD2/RENBP/NUDT14/ALG5/SLC17A5/DPM3/DPM2/GLB1/DPM1/NANS/ST3GAL5/ST6GALNAC6/CMAS/PMM1/MVD/ST3GAL2/ST6GALNAC4/NEU1/GNPNAT1/NAGK/SLC35C1/SLC35A1/ST6GAL1/NUS1/GMPPA/ST3GAL6/ST3GAL4
heart	ACTIVATION OF MATRIX METALLOPROTEINASES	1.57028	0.0447595	MMP9/TIMP2/CTSK/MMP14/MMP7/FURIN
heart	AUF1 HNRNP D0 BINDS AND DESTABILIZES MRNA	1.55014	0.0335539	HSPB1/PSMD8/PSMB6/PSMC3/PSMD14/PSMC4/PSMA7/SEM1/PSMB1/PSMD7/PSMB5/PSMD3/PSMF1/PSMC1/PSMC5/PSMD9/PSMC6/PSMB3/PSMC2/PSMB7/PSMA3/PSMD2/PSMD1/PSMB2/PSMD10/PSMD4/PSMA6/PSMA2/PSMD13/PSME3/EIF4G1/PSMA1/PSMA5
heart	GAP JUNCTION TRAFFICKING AND REGULATION	1.54992	0.046627	TUBB6/TUBA1A/AP2M1/TUBA1B/TUBA1C/ACTG1/CLTA/TUBB2A/ACTB/CLTB
heart	VASOPRESSIN REGULATES RENAL WATER HOMEOSTASIS VIA AQUAPORINS	1.54838	0.0356922	GNG5/GNAS/PRKAR1B/RAB11A/PRKACB/PRKAR1A/GNB4/GNG11/GNB1/GNB2
heart	REGULATION OF INSULIN LIKE GROWTH FACTOR IGF TRANSPORT AND UPTAKE BY INSULIN LIKE GROWTH FACTOR BINDING PROTEINS IGFBPS	1.54522	0.0130345	SPP1/APOE/FN1/SDC2/CALU/LGALS1/PDIA6/P4HB/FAM20C/NUCB1/PRSS23/FUCA2/HSP90B1
heart	BIOSYNTHESIS OF THE N GLYCAN PRECURSOR DOLICHOL LILINKED OLIGOSACCHARIDE LLO AND TRANSFER TO A NASCENT PROTEIN	1.54319	0.0269489	SRD5A3/NPL/CTSA/FUOM/AMDHD2/RENBP/NUDT14/ALG5/SLC17A5/DPM3/DPM2/ALG3/GLB1/DPM1/NANS/ST3GAL5/ALG8/ST6GALNAC6/CMAS/PMM1/MVD/ST3GAL2/ST6GALNAC4/NEU1/DPAGT1/GNPNAT1/NAGK/ALG12/ALG1/SLC35C1/SLC35A1/ST6GAL1/NUS1/GMPPA/ST3GAL6/ST3GAL4
heart	SIGNALING BY NOTCH4	1.53944	0.0189689	PSMD8/PSMB6/PSMC3/PSMD14/PSMC4/PSMA7/SEM1/PSMB1/PSMD7/PSMB5/PSENEN/PSMD3/PSMF1/AKT1/RBX1/PSMC1/PSMC5/PSMD9/PSMC6/APH1A/PSMB3/SKP1/PSMC2/NCSTN/PSMB7/PSMA3/ADAM10/PSMD2/PSMD1/PSMB2/PSMD10/PSMD4/PSMA6/PSEN2/PSMA2/APH1B/PSMD13/PSME3/YWHAZ/PSMA1/PSMA5/MAML2/SNW1/PSMB4
heart	REGULATION OF HMOX1 EXPRESSION AND ACTIVITY	1.53791	0.0342182	HM13/PSMD8/PSMB6/PSMC3/PSMD14/PSMC4/PSMA7/SEM1/PSMB1/PSMD7/PSMB5/CSNK2B/PSMD3/PSMF1/RBX1/PSMC1/PSMC5/PSMD9/PSMC6/PSMB3/SKP1/PSMC2/PSMB7/PSMA3/PSMD2/PSMD1/PSMB2/PSMD10/PSMD4/PSMA6/PSMA2/KEAP1/PSMD13/CSNK2A2/PSME3/PSMA1/PSMA5
heart	REGULATION OF RUNX2 EXPRESSION AND ACTIVITY	1.5375	0.0285005	PSMD8/PSMB6/PSMC3/PSMD14/PSMC4/PSMA7/SEM1/PSMB1/PSMD7/PSMB5/PSMD3/PSMF1/RBX1/STUB1/PSMC1/PSMC5/PSMD9/PSMC6/PSMB3/SKP1/PSMC2/PSMB7/PSMA3/PSMD2/PSMD1/PSMB2/PSMD10/PSMD4/WWP1/CBFB/PSMA6/PSMA2/PSMD13/PSME3/PSMA1/PSMA5
heart	CITRIC ACID CYCLE TCA CYCLE	1.53646	0.0456382	SDHD/SDHC/IDH2/FAHD1/SDHA/MDH2/SDHB/SUCLG1/ME3/DLD/IDH3G/IDH3B/DLST/NNT/ME2/SUCLA2/ACO2
heart	POTASSIUM CHANNELS	1.53568	0.0452691	GNG5/KCNJ5/KCNN4/GNB4/KCNMB1/GNG11/KCNK6/KCNAB2/GNB1/GNB2/KCNMA1
heart	REGULATION OF RAS BY GAPS	1.53497	0.0408327	PSMD8/RASAL2/PSMB6/PSMC3/PSMD14/PSMC4/PSMA7/SEM1/PSMB1/HRAS/PSMD7/PSMB5/PSMD3/RASA1/PSMF1/RBX1/PSMC1/PSMC5/PSMD9/PSMC6/PSMB3/PSMC2/PSMB7/PSMA3/PSMD2/NRAS/PSMD1/PSMB2/PSMD10/PSMD4/PSMA6/PSMA2/PSMD13/PSME3/PSMA1/PSMA5
heart	MITOCHONDRIAL FATTY ACID BETA OXIDATION	1.53494	0.0457869	DBI/ACAA2/ACOT7/ECHS1/ACADVL/ACOT13/NDUFAB1/DECR1/HADH/HADHB/ACOT2/ACOT11/ACADS/ACADM/ECI1/THEM4
heart	DEGRADATION OF AXIN	1.53287	0.0394879	PSMD8/PSMB6/PSMC3/PSMD14/PSMC4/PSMA7/SEM1/PSMB1/PSMD7/PSMB5/PSMD3/PSMF1/PSMC1/PSMC5/PSMD9/PSMC6/PSMB3/PSMC2/PSMB7/PSMA3/PSMD2/PSMD1/PSMB2/PSMD10/PSMD4/PSMA6/PSMA2/PSMD13/PSME3/PSMA1/PSMA5
heart	MRNA SPLICING MINOR PATHWAY	1.53261	0.0450964	POLR2E/POLR2L/TXNL4A/NCBP2/YBX1/POLR2I/POLR2F/LSM2/POLR2J/POLR2K/SNRPD2/SF3B6/SNRPD1/SNRPF/POLR2C/SNRPB/SF3B5/ZMAT5/SNRPE/SF3B4/ZCRB1/POLR2G/SF3B2/SNRNP25/SNRPD3/GTF2F1/SNRNP48/SNRNP200/EFTUD2/SNRPG/ZRSR2/SNRNP40/POLR2H/DDX42/SNU13/POLR2D/DDX23
heart	ASYMMETRIC LOCALIZATION OF PCP PROTEINS	1.5322	0.0300913	PSMD8/PSMB6/PSMC3/PSMD14/PSMC4/PSMA7/SEM1/PSMB1/PSMD7/PSMB5/PSMD3/PSMF1/PSMC1/PSMC5/PSMD9/PSMC6/PSMB3/FZD1/PSMC2/PSMB7/PSMA3/PSMD2/PSMD1/PSMB2/PSMD10/PSMD4/PSMA6/PSMA2/PSMD13/PSME3/PSMA1/PSMA5/DVL2
heart	THE ROLE OF GTSE1 IN G2 M PROGRESSION AFTER G2 CHECKPOINT	1.52592	0.0274937	TUBB6/TUBA1A/TUBA1B/PSMD8/TUBA1C/PSMB6/PSMC3/PSMD14/PSMC4/PSMA7/SEM1/PSMB1/PSMD7/PSMB5/PSMD3/PSMF1/PSMC1/PSMC5/PSMD9/PSMC6/PSMB3/MAPRE1/PSMC2/PSMB7/PSMA3/TUBB2A/PSMD2/PSMD1/PSMB2/PSMD10/PSMD4/PSMA6/PSMA2/PSMD13/PSME3/PSMA1/PSMA5
heart	METABOLISM OF POLYAMINES	1.52279	0.0336326	SMS/PSMD8/PSMB6/PSMC3/PSMD14/PSMC4/PSMA7/SRM/SEM1/PSMB1/PSMD7/PSMB5/PSMD3/PSMF1/PSMC1/PSMC5/PSMD9/PSMC6/PSMB3/PSMC2/PSMB7/PSMA3/PSMD2/PSMD1/PSMB2/PSMD10/PSMD4/PSMA6/PSMA2/PSMD13/PSME3/PSMA1/PSMA5
heart	ASPARAGINE N LINKED GLYCOSYLATION	1.52207	7.00658e-05	SRD5A3/NPL/TMED9/TUBB6/CD59/CALR/CTSA/TUBA1A/TMED2/CTSZ/DAD1/FUOM/RPN1/TMED10/AMDHD2/ANKRD28/PDIA3/TUBA1B/DYNLL1/DCTN2/TUBA1C/TRAPPC2L/KDELR2/CAPZB/FUCA1/COPZ1/DERL1/RNF5/RENBP/LMAN2/KDELR1/CAPZA2/LMAN1/DERL2/CNIH1/NUDT14/ALG5/CANX/ARF1/SLC17A5/VCP/MGAT4B/ARF5/DYNC1I2/DPM3/DPM2/ARF3/ALG3/GLB1/PSMC1/DPM1/SPTAN1/NANS/ACTR10/RAB1A/YKT6/SEC22C/ARFGAP3/DCTN3/RPN2/ACTR1A/COPE/DDOST/TRAPPC1/OS9/TRAPPC3/…
heart	DEGRADATION OF DVL	1.52149	0.0379136	PSMD8/PSMB6/PSMC3/PSMD14/PSMC4/PSMA7/SEM1/PSMB1/PSMD7/PSMB5/PSMD3/PSMF1/RBX1/PSMC1/PSMC5/PSMD9/PSMC6/PSMB3/PSMC2/PSMB7/PSMA3/PSMD2/PSMD1/PSMB2/PSMD10/PSMD4/PSMA6/PSMA2/PSMD13/PSME3/PSMA1/PSMA5/DVL2
heart	CROSS PRESENTATION OF SOLUBLE EXOGENOUS ANTIGENS ENDOSOMES	1.52132	0.0404891	PSMD8/PSMB6/PSMC3/PSMD14/PSMC4/PSMA7/SEM1/PSMB1/PSMD7/PSMB5/PSMD3/PSMF1/PSMC1/PSMC5/PSMD9/PSMC6/PSMB3/PSMC2/PSMB7/PSMA3/PSMD2/PSMD1/PSMB2/PSMD10/PSMD4/PSMA6/PSMA2/PSMD13/PSME3/PSMA1/PSMA5
heart	REGULATION OF PTEN STABILITY AND ACTIVITY	1.51885	0.0336326	PSMD8/PSMB6/PSMC3/PSMD14/PSMC4/PSMA7/SEM1/PSMB1/PSMD7/PSMB5/CSNK2B/PSMD3/PSMF1/AKT1/STUB1/PSMC1/PSMC5/PSMD9/PSMC6/PSMB3/PSMC2/PSMB7/PSMA3/PSMD2/PSMD1/PSMB2/PSMD10/PSMD4/PSMA6/PSMA2/PSMD13/CSNK2A2/PSME3/PSMA1/PSMA5
heart	TRANS GOLGI NETWORK VESICLE BUDDING	1.51868	0.0338058	AP3S1/CTSZ/DNASE2/RAB5C/SORT1/CHMP2A/CLTA/AP1S1/VAMP8/STX4/ARF1/SNX2/SNX5/SNAPIN/M6PR/BLOC1S1/IGF2R/TGOLN2/SNX9/HGS/BLOC1S4/CLTB/GNS/APP
heart	HEDGEHOG ON STATE	1.51615	0.0268053	PSMD8/PSMB6/PSMC3/PSMD14/PSMC4/PSMA7/SEM1/PSMB1/PSMD7/PSMB5/PSMD3/PSMF1/RBX1/ARRB2/PSMC1/PSMC5/PSMD9/PSMC6/PSMB3/PSMC2/PSMB7/PSMA3/PSMD2/PSMD1/PSMB2/PSMD10/PSMD4/PSMA6/PSMA2/PSMD13/PSME3/CDC73/PSMA1/PSMA5
heart	PROTEIN FOLDING	1.5158	0.0193907	TUBB6/TUBA1A/ARL2/GNG5/TUBA1B/TBCB/TUBA1C/CCT7/CCT2/CCT5/CSNK2B/FBXW5/VBP1/PFDN6/GNB4/GNG11/CCT3/CCT4/TUBB2A/HDAC3/CCT6A/CCT8/ACTB/PFDN2/GNB1/CSNK2A2/GNB2/TBCA/ARFGEF2/TBCC/FBXL3/PDCL/KIFC3/NOP56/USP11/GBA/PFDN1/CSNK2A1/AP3M1/GNG12
heart	REGULATION OF RUNX3 EXPRESSION AND ACTIVITY	1.51498	0.0409015	PSMD8/PSMB6/PSMC3/PSMD14/PSMC4/PSMA7/SEM1/PSMB1/PSMD7/PSMB5/PSMD3/PSMF1/PSMC1/PSMC5/PSMD9/PSMC6/PSMB3/PSMC2/PSMB7/PSMA3/PSMD2/PSMD1/PSMB2/PSMD10/PSMD4/CBFB/PSMA6/PSMA2/PSMD13/PSME3/PSMA1/PSMA5
heart	ABC FAMILY PROTEINS MEDIATED TRANSPORT	1.51434	0.0239303	PSMD8/ABCC5/PSMB6/PSMC3/PSMD14/PSMC4/PSMA7/DERL1/RNF5/SEM1/PSMB1/DERL2/PSMD7/PSMB5/VCP/PSMD3/PSMF1/PSMC1/PSMC5/PSMD9/PSMC6/EIF2S1/PSMB3/PSMC2/PSMB7/OS9/PSMA3/PSMD2/PSMD1/PSMB2/PSMD10/ABCC3/PSMD4/PSMA6/ERLEC1/PSMA2/PSMD13/PSME3/PSMA1/PSMA5
heart	STABILIZATION OF P53	1.51007	0.043418	PSMD8/PSMB6/PSMC3/PSMD14/PSMC4/PSMA7/SEM1/PSMB1/PSMD7/PSMB5/PSMD3/PSMF1/PSMC1/PSMC5/PSMD9/PSMC6/PSMB3/PSMC2/PSMB7/PSMA3/PSMD2/PSMD1/PSMB2/PSMD10/PSMD4/PSMA6/PSMA2/PSMD13/PSME3/PSMA1/PSMA5
heart	CDT1 ASSOCIATION WITH THE CDC6 ORC ORIGIN COMPLEX	1.50961	0.0384986	PSMD8/PSMB6/PSMC3/PSMD14/PSMC4/PSMA7/SEM1/PSMB1/PSMD7/PSMB5/PSMD3/PSMF1/PSMC1/PSMC5/PSMD9/PSMC6/PSMB3/PSMC2/PSMB7/PSMA3/PSMD2/PSMD1/PSMB2/PSMD10/PSMD4/PSMA6/PSMA2/PSMD13/PSME3/PSMA1/PSMA5
heart	SPHINGOLIMETABOLISM	1.50044	0.0379136	HEXB/CTSA/ORMDL2/HEXA/DEGS1/ASAH1/GM2A/ALDH3A2/VAPA/GLB1/CERS2/SPTSSA/SGMS2/KDSR/CERS5/SUMF2/SMPD1/NEU1/SUMF1/UGCG/ALDH3B1/GLTP/PSAP/ESYT1/SGPL1/ESYT2/SGPP1/PRKD3/ARSK/ARSA/GBA
heart	RESPONSE TO ELEVATED PLATELET CYTOSOLIC CA2	1.49503	0.0282859	CD9/FN1/CD36/A2M/ECM1/ACTN1/FLNA/CD63/CALU/WDR1/LHFPL2/CD109/ANXA5/TAGLN2/HGF/MANF/SCCPDH/SERPINE1/LAMP2/CFD/CAP1/FAM3C/FERMT3/CLEC3B/TIMP3/SPARC/TEX264/CALM1/VEGFB/STX4/SOD1/VTI1B/CHID1/SERPING1/PDGFA
heart	INTRA GOLGI AND RETROGRADE GOLGI TO ER TRAFFIC	1.49357	0.00696662	TMED9/TUBB6/TUBA1A/TMED2/TMED10/TUBA1B/DYNLL1/DCTN2/GOLIM4/TUBA1C/KIF1B/KDELR2/CAPZB/COPZ1/KDELR1/CAPZA2/SCOC/VAMP3/ARF1/SNAP29/ARL1/RAB6A/ARF5/DYNC1I2/ARFRP1/ARF3/SURF4/M6PR/KIF22/ACTR10/RAB1A/YKT6/IGF2R/ARFGAP3/DCTN3/ACTR1A/COPE/RAB9A/TUBB2A/CAPZA1/COPG1/PAFAH1B2/TGOLN2/DCTN1/RAB18/DYNC1LI2/TMED3/RABEPK/STX18/TMED7/CYTH2/PAFAH1B3/PLIN3/MAN1A1/DCTN6/ARFGAP2/GALNT1
heart	EXTRACELLULAR MATRIX ORGANIZATION	1.48313	0.00089799	SPP1/FN1/SDC2/CTSD/A2M/MMP19/CD151/ACTN1/ITGB5/BSG/MMP9/ADAM9/P4HB/TIMP2/PPIB/CTSB/SERPINE1/CTSK/PLOD3/CAPN2/CTSL/SPARC/SDC4/ITGAX/ITGB1/ADAM15/CD47/CAPN1/DST/PDGFA/PLEC/MMP14/CAPNS1/HTRA1/MMP7/NCSTN/ITGB2/ADAM10/ADAM17/SERPINH1/TRAPPC4/COLGALT1/EMILIN2/COL22A1
heart	METABOLISM OF STEROIDS	1.47196	0.0213074	CYP27A1/LGMN/HSD3B7/SRD5A3/RAN/FDX1/AKR1B1/UBE2I/FDX2/FDPS/MSMO1/SQLE/STARD3/HSD17B4/SCP2/HSD17B14/CHD9/GGPS1/OSBPL1A/SEC23A/TSPO/FDFT1/ABCC3/MVD/OSBPL3/SREBF2/NFYC/ACAT2/CYP51A1/DHCR24/HSD17B12/EBP/NSDHL/HSD17B11/PMVK/SC5D/ARV1/SUMO2
heart	BETA CATENIN INDEPENDENT WNT SIGNALING	1.45507	0.0263644	AP2M1/GNG5/PSMD8/PSMB6/PSMC3/PSMD14/PSMC4/PSMA7/AP2S1/SEM1/PSMB1/CLTA/CALM1/AP2A2/PSMD7/PSMB5/PSMD3/PSMF1/ARRB2/PSMC1/PSMC5/PSMD9/PSMC6/RHOA/GNB4/PSMB3/DAAM1/GNG11/FZD1/PSMC2/PSMB7/PSMA3/PSMD2/PSMD1/PSMB2/PSMD10/MYC/PSMD4/PSMA6/PLCB3/PSMA2/RYK/PFN1/AP2B1/GNB1/PSMD13/GNB2/PSME3/CLTB/PSMA1/RAC1/PSMA5
heart	ER TO GOLGI ANTEROGRADE TRANSPORT	1.44421	0.0268053	TMED9/TUBB6/CD59/TUBA1A/TMED2/CTSZ/TMED10/ANKRD28/TUBA1B/DYNLL1/DCTN2/TUBA1C/TRAPPC2L/KDELR2/CAPZB/COPZ1/LMAN2/KDELR1/CAPZA2/LMAN1/CNIH1/ARF1/ARF5/DYNC1I2/ARF3/SPTAN1/ACTR10/RAB1A/YKT6/SEC22C/ARFGAP3/DCTN3/ACTR1A/COPE/TRAPPC1/TRAPPC3/SEC23A/MCFD2/TUBB2A/USO1/CAPZA1/COPG1/TMEM115/TRAPPC4/DCTN1/PPP6C/DYNC1LI2/TMED3/SEC13/SCFD1/TMED7
heart	DISORDERS OF TRANSMEMBRANE TRANSPORTERS	1.43251	0.0379136	BSG/PSMD8/PSMB6/PSMC3/PSMD14/PSMC4/PSMA7/DERL1/RNF5/SEM1/PSMB1/DERL2/PSMD7/ABCD4/PSMB5/SLC17A5/SLC1A3/VCP/PSMD3/PSMF1/PSMC1/PSMC5/PSMD9/PSMC6/PSMB3/PSMC2/PSMB7/SLC29A3/LMBRD1/OS9/PSMA3/PSMD2/SLC12A6/SLC3A2/PSMD1/PSMB2/PSMD10/PSMD4/PSMA6/ERLEC1/PSMA2/SEC13/SLC9A6/SLC22A18/PSMD13/SEH1L/SLC39A4/PSME3/SLC26A2/SLC35A2/SLC40A1/PSMA1/NUP85/PSMA5/NUP93/SLC33A1/NUP54/PSMB4/AAAS/SLC35C1/SLC35A3/SLC35A1
heart	BIOLOGICAL OXIDATIONS	1.42895	0.0335539	CYP27A1/MGST3/GSTO1/ALDH1A1/PAPSS1/COMT/DPEP2/HPGDS/AKR1A1/FDX1/TRMT112/EPHX1/GGCT/GCLC/ESD/FDX2/CYB5R3/ADH5/AHCY/PTGES3/TPST2/AKR7A2/CNDP2/CBR3/AIP/UGDH/PTGS1/POR/SLC26A2/CYP51A1/CYP2S1/CYB5B/NQO2
heart	HOST INTERACTIONS OF HIV FACTORS	1.4266	0.0443839	RAN/AP2M1/BANF1/RANBP1/PSMD8/HMGA1/PSMB6/PSMC3/PSMD14/PSMC4/PSMA7/AP2S1/SEM1/PSMB1/AP1S1/AP2A2/PSMD7/PSMB5/ARF1/PSMD3/PSMF1/RBX1/PSMC1/PSMC5/PSMD9/ATP6V1H/PSMC6/PSMB3/SKP1/CD28/ELOC/PSMC2/PSMB7/PSMA3/PPIA/PSMD2/PSMD1/PSMB2/PSMD10/PSMD4/PSMA6/PSMA2/SEC13/NPM1/AP2B1/PAK2/PSMD13/SEH1L/ELOB/PSME3/PSMA1/NUP85/RAC1/PSMA5/NUP93/XPO1/NUP54/PSMB4/AAAS
heart	TRANSPORT TO THE GOLGI AND SUBSEQUENT MODIFICATION	1.40644	0.0410105	TMED9/TUBB6/CD59/TUBA1A/TMED2/CTSZ/TMED10/ANKRD28/TUBA1B/DYNLL1/DCTN2/TUBA1C/TRAPPC2L/KDELR2/CAPZB/FUCA1/COPZ1/LMAN2/KDELR1/CAPZA2/LMAN1/CNIH1/ARF1/MGAT4B/ARF5/DYNC1I2/ARF3/SPTAN1/ACTR10/RAB1A/YKT6/SEC22C/ARFGAP3/DCTN3/ACTR1A/COPE/TRAPPC1/TRAPPC3/SEC23A/MCFD2/TUBB2A/USO1/CAPZA1/COPG1/TMEM115/TRAPPC4/DCTN1/PPP6C/DYNC1LI2/MGAT2/TMED3/SEC13/SCFD1/TMED7
heart	REGULATION OF ACTIN CYTOSKELETON	1.4023	0.0288585	FN1/GSN/ACTN1/ITGB5/MRAS/IQGAP2/CYFIP1/SCIN/RDX/ACTG1/PPP1CA/BAIAP2/ITGAX/HRAS/ITGB1/ARPC5/MYL12B/MSN/PIK3R5/ABI2/ARPC4/RRAS/PDGFA/RHOA/MYH9/LIMK1/CFL1/BRK1/ITGB2/NRAS/ARPC2/MYL9/ACTB/MYL12A/PFN1/PIK3R1/PAK2/ITGAV/ARPC3/MAP2K2/RAC1/ARPC5L/IQGAP1/MAPK1/TIAM1/CSK/ITGA3/CDC42/WASF2/KRAS/PIP5K1C/MAPK3/DOCK1/GNA12/WASL/PIK3CA/GNG12/ACTN4
heart	MITOTIC G2 G2 M PHASES	1.39699	0.0323768	TUBB/TUBB6/PHLDA1/TUBA1A/TUBA1B/PSMD8/DYNLL1/DCTN2/TUBA1C/PSMB6/SSNA1/PSMC3/PSMD14/PSMC4/PSMA7/MZT2A/SEM1/PSMB1/PSMD7/PSMB5/MZT2B/PSMD3/PPP2R1A/DYNC1I2/PSMF1/RBX1/PSMC1/PSMC5/PSMD9/PSMC6/YWHAE/PSMB3/CETN2/SKP1/DCTN3/MAPRE1/ACTR1A/PSMC2/PSMB7/PSMA3/PPP2CB/TUBB2A/PSMD2/YWHAG/PSMD1/DCTN1/PSMB2/PSMD10/PSMD4/PSMA6/PSMA2/PSMD13/RAB8A/HAUS1/PSME3/PSMA1/PCM1/PSMA5/SDCCAG8/TUBG1/TUBGCP2/CDC25B/XPO1/PPP2CA…
heart	SEPARATION OF SISTER CHROMATIDS	1.38371	0.0391465	TUBB6/TUBA1A/ANAPC11/TUBA1B/PSMD8/MAD1L1/DYNLL1/TUBA1C/PSMB6/PSMC3/PSMD14/PSMC4/PSMA7/SEM1/PSMB1/PSMD7/NUDC/PSMB5/PSMD3/PPP2R1A/DYNC1I2/PSMF1/PSMC1/PSMC5/PSMD9/PSMC6/PSMB3/MAPRE1/PSMC2/BUB3/PSMB7/PSMA3/PPP2CB/TUBB2A/PSMD2/ANAPC15/PSMD1/PSMB2/PSMD10/PSMD4/DYNC1LI2/PSMA6/PSMA2/SEC13/PSMD13/SEH1L/PSME3/CDC27/PSMA1/NUP85/PSMA5/CDC26/NSL1/RAD21/PMF1/CDC16/SMC3/CENPT/XPO1/UBE2E1/PPP2CA/PSMB4
heart	MITOTIC METAPHASE AND ANAPHASE	1.37891	0.0282859	LMNA/TUBB6/TUBA1A/RAN/ANAPC11/BANF1/TUBA1B/PSMD8/MAD1L1/DYNLL1/TUBA1C/PSMB6/PSMC3/PSMD14/PSMC4/PSMA7/CHMP2A/UBE2I/SEM1/PSMB1/CHMP3/PSMD7/NUDC/PSMB5/CHMP4A/PSMD3/PPP2R1A/DYNC1I2/PSMF1/PSMC1/PSMC5/PSMD9/CHMP4B/PSMC6/SUMO1/PSMB3/VPS4A/MAPRE1/PSMC2/BUB3/PSMB7/PSMA3/PPP2CB/TUBB2A/PSMD2/SIRT2/ANAPC15/PSMD1/PSMB2/PSMD10/CHMP2B/PSMD4/DYNC1LI2/PSMA6/PSMA2/SEC13/IST1/PSMD13/SEH1L/PSME3/CDC27/PSMA1/EMD/NUP8…
heart	HIV INFECTION	1.37626	0.0306398	RAN/AP2M1/BANF1/RANBP1/PSMD8/HMGA1/PSMB6/POLR2E/POLR2L/PSMC3/PSMD14/NCBP2/PSMC4/PSMA7/AP2S1/CHMP2A/SEM1/PSMB1/CHMP3/AP1S1/AP2A2/PSMD7/PSMB5/POLR2I/ARF1/VPS28/CHMP4A/PSMD3/POLR2F/PSMF1/GTF2H5/RBX1/PSMC1/PSMC5/PSMD9/ATP6V1H/CHMP4B/POLR2J/POLR2K/PSMC6/NELFE/PSMB3/SKP1/VPS4A/GTF2A2/CD28/ELOC/PSMC2/PSMB7/POLR2C/TAF9/PSMA3/PPIA/PSMD2/VTA1/NELFCD/PSMD1/PSMB2/PSMD10/CHMP2B/PSMD4/PSMA6/PSMA2/SSRP1/SEC13/N…
heart	NEURONAL SYSTEM	1.35483	0.036955	TUBB6/TUBA1A/COMT/AP2M1/GNG5/NPTN/EPB41L2/TUBA1B/RPS6KA2/TUBA1C/RTN3/PPFIBP1/AP2S1/ARL6IP5/CALM1/KCNJ5/NRGN/DLGAP4/AP2A2/HRAS/PRKAR1B/HOMER3/SLC1A3/KCNN4/PRKACB/PRKAR1A/GNB4/PRKAG1/KCNMB1/SHARPIN/GNG11/RPS6KA1/TUBB2A/KCNK6/EPB41L1/NRAS/KCNAB2/PDLIM5/DBNL/PRKX/PLCB3/AP2B1/GNB1/GNB2/KCNMA1
heart	M PHASE	1.35379	0.0129161	LMNA/TUBB/TUBB6/TUBA1A/RAN/ANAPC11/BANF1/TUBA1B/PSMD8/MAD1L1/DYNLL1/DCTN2/TUBA1C/PSMB6/SSNA1/PSMC3/PSMD14/PSMC4/PSMA7/MZT2A/CHMP2A/UBE2I/SEM1/PSMB1/CHMP3/NEK6/PSMD7/NUDC/PSMB5/MZT2B/RAB2A/CSNK2B/CHMP4A/ENSA/PSMD3/PPP2R1A/DYNC1I2/PSMF1/ARPP19/PSMC1/PSMC5/PSMD9/CHMP4B/GORASP2/PSMC6/YWHAE/RAB1A/SUMO1/PSMB3/CETN2/VPS4A/DCTN3/MAPRE1/ACTR1A/PSMC2/BUB3/PSMB7/PSMA3/PPP2CB/TUBB2A/PSMD2/USO1/SIRT2/YWHAG/AN…
heart	SIGNALING BY WNT	1.331	0.0460362	AP2M1/GNG5/PSMD8/PSMB6/VPS29/PSMC3/PSMD14/PSMC4/PSMA7/AP2S1/SEM1/PSMB1/CLTA/CALM1/TMED5/AP2A2/PSMD7/PSMB5/CSNK2B/PSMD3/PPP2R1A/PSMF1/AKT1/RBX1/ARRB2/PSMC1/PSMC5/PSMD9/PSMC6/RHOA/GNB4/SNX3/PSMB3/DAAM1/SKP1/GNG11/FZD1/PSMC2/PSMB7/VPS26A/KAT5/PSMA3/PPP2CB/PSMD2/PSMD1/PSMB2/PSMD10/MYC/PSMD4/PSMA6/PLCB3/SMARCA4/PSMA2/RYK/PFN1/AP2B1/GNB1/PSMD13/CSNK2A2/GNB2/PSME3/YWHAZ/CLTB/CDC73/PSMA1/RAC1/PSMA5/DVL2/…
heart	NERVOUS SYSTEM DEVELOPMENT	1.31246	0.00932777	TREM2/SDC2/ALCAM/RHOC/TUBB6/RPS27L/TUBA1A/MMP9/AP2M1/EVL/RDX/ACTR3/DOK2/TUBA1B/PSMD8/DPYSL3/RPS6KA2/TUBA1C/PSMB6/CAP1/PSMC3/PSMD14/NCBP2/ACTG1/PSMC4/PSMA7/GSPT1/AP2S1/SEM1/PSMB1/CLTA/SHTN1/MYL6/AP2A2/HRAS/PSMD7/ITGB1/ARPC5/PSMB5/CSNK2B/PSENEN/PSMD3/PRKACB/MYL12B/MSN/DPYSL2/RASA1/PSMF1/ARPC4/RRAS/RBX1/RPL26L1/PSMC1/PSMC5/PSMD9/SPTAN1/GFRA2/PLXNA3/PSMC6/RHOA/MYH9/APH1A/NRP2/LYPLA2/LIMK1/PSMB3/CFL1/…
heart	HEMOSTASIS	1.28387	0.0220827	CD9/FN1/SDC2/MGLL/CD36/P2RX4/ANXA2/A2M/ECM1/CD99/ACTN1/FLNA/CD63/CALU/S100A10/WDR1/CD84/TUBB6/MIF/LHFPL2/CD109/BSG/ANXA5/GYPC/TUBA1A/TAGLN2/ATP1B1/HGF/MANF/SCCPDH/GNG5/ABHD12/SERPINE1/HMG20B/P2RX7/ATP2B4/LAMP2/DOK2/TUBA1B/SIRPA/CFD/TUBA1C/CAP1/KIF1B/FAM3C/SLC7A8/FERMT3/GNAS/CAPZB/CD58/CLEC3B/TIMP3/SPARC/TEX264/SDC4/ITGAX/CALM1/CAPZA2/VEGFB/C1QBP/HRAS/SLC16A3/STX4/PRKAR1B/ITGB1/SRI/SOD1/VTI1B/CD47…
heart	TOLL LIKE RECEPTOR CASCADES	-1.42907	0.0342326	TLR4/UBC/MAP2K1/CTSS/RPS27A/MAP3K1/GSDMD/UBE2D1/MYD88/TANK/MAP2K3/MEF2C/NFKB2/SOCS1/DUSP6/IRF7/NFKB1/FOS/RIPK2/MAP3K8/TLR2/NFKBIA/IRAK3/S100A9/BIRC3/S100A8/S100A12
heart	CHEMOKINE SIGNALING PATHWAY	-1.44189	0.0220411	MAP2K1/PLCB2/GRK3/GRB2/JAK2/DOCK2/PIK3CD/RASGRP2/CCL3/CCR2/FOXO3/CX3CR1/CCL2/STAT3/GRK2/CXCL12/HCK/JAK3/LYN/CCL4/PRKCB/STAT1/CCL8/WAS/NFKB1/PREX1/CXCL10/CXCL3/CXCR4/CCL4L2/NFKBIA/CXCL2/CXCL8/CCL20
heart	SRP DEPENDENT COTRANSLATIONAL PROTEIN TARGETING TO MEMBRANE	-1.4478	0.0417337	RPL36/RPLP2/UBA52/RPS2/RPS15/RPS21/RPL37A/RPS18/RPL7/RPS29/RPL9/RPS25/RPL11/RPL19/RPL13/RPL3/RPS28/RPL39/RPL5/FAU/RPS27/RPS10/RPS19/RPL31/RPS7/RPL22/RPS20/RPL28/RPS14/RPL18A/RPL27/RPL38/RPL32/RPS9/RPL6/RPS17/RPS23/RPS24/RPS12/RPL10A/RPS8/RPS3A/RPS16/RPL21/RPL22L1/RPL29/RPS3/RPS27A/RPS4X/RPL13A/RPS15A/RPL4/RPL34/RPL26/RPL37/RPL17/RPS6/RPL23A/RPL18/RPL35A/RPL30/RPL23/RPL36A/RPL24/RPS11/RPS13
heart	MYD88 INDEPENDENT TLR4 CASCADE	-1.4715	0.0417337	MAPKAPK2/MAPK7/RIPK1/MAP2K6/BIRC2/RPS6KA5/UBA52/TICAM1/NOD2/TLR4/UBC/MAP2K1/RPS27A/UBE2D1/TANK/MAP2K3/MEF2C/NFKB2/DUSP6/IRF7/NFKB1/FOS/RIPK2/MAP3K8/NFKBIA/BIRC3/S100A12
heart	NEGATIVE REGULATION OF THE PI3K AKT NETWORK	-1.4889	0.0303442	GRB2/PIK3CD/INSR/PIK3AP1/MYD88/PTEN/IL1RAP/NRG1/IER3/IRS2/AREG/HBEGF/EREG
heart	IMMUNOREGULATORY INTERACTIONS BETWEEN A LYMPHOID AND A NON LYMPHOID CELL	-1.50394	0.0162241	HLA-B/HLA-A/ITGAL/ITGA4/CD300A/FCGR1A/LILRB1/ICAM4/CD300LF/CD1D/LILRA1/HLA-F/C3/LILRB2/JAML/ICAM1/SIGLEC10/IFITM1/SELL/CD300E/ICAM3/LILRA5
heart	TOLL LIKE RECEPTOR TLR1 TLR2 CASCADE	-1.58894	0.0130345	SFTPD/MAPKAPK2/MAPK7/PELI2/MAP2K6/RPS6KA5/S100A1/UBA52/PELI1/NOD2/TLR4/UBC/MAP2K1/RPS27A/MAP3K1/MYD88/MAP2K3/MEF2C/NFKB2/SOCS1/DUSP6/NFKB1/FOS/RIPK2/MAP3K8/TLR2/NFKBIA/IRAK3/S100A9/S100A8/S100A12
heart	RIG I LIKE RECEPTOR SIGNALING PATHWAY	-1.64308	0.0373926	RIPK1/TNF/CASP10/IFIH1/MAP3K1/CYLD/AZI2/TANK/IRF7/ISG15/DDX3X/NFKB1/CXCL10/DDX3Y/NFKBIA/CXCL8
heart	INTERLEUKIN 4 AND INTERLEUKIN 13 SIGNALING	-1.66031	0.00696662	JAK2/IL4R/RHOU/FOXO3/CCL2/STAT3/IL23A/IL6/HIF1A/JAK3/SOCS1/STAT1/BCL6/JUNB/FOS/CEBPD/TNFRSF1B/ICAM1/SOCS3/IL1A/F13A1/MCL1/CDKN1A/VEGFA/CXCL8/OSM/PTGS2/IL1B
heart	INITIAL TRIGGERING OF COMPLEMENT	-1.67862	0.0452691	IGHG1/IGHG4/IGLC2/C3/CFP/FCN1
heart	LEISHMANIA INFECTION	-1.68157	0.0193907	JAK2/MYD88/ITGA4/FCGR1A/CR1/PRKCB/STAT1/C3/NFKB1/FOS/TLR2/MARCKSL1/NFKBIA/IL1A/PTGS2/IL1B
heart	PI3K AKT SIGNALING IN CANCER	-1.69004	0.00562796	GRB2/PIK3CD/PIK3AP1/FOXO3/PTEN/CDKN1B/NRG1/NR4A1/IRS2/CDKN1A/AREG/HBEGF/EREG
heart	DDX58 IFIH1 MEDIATED INDUCTION OF INTERFERON ALPHA BETA	-1.69388	0.00998834	HSP90AB1/RIPK1/UBA52/UBA7/CASP10/UBE2L6/IFIH1/UBC/NLRC5/CREBBP/RPS27A/MAP3K1/EP300/HERC5/CYLD/UBE2D1/TANK/NFKB2/IRF7/ISG15/NFKB1/NFKBIA/TNFAIP3/S100A12
heart	CONSTITUTIVE SIGNALING BY ABERRANT PI3K IN CANCER	-1.71919	0.0170149	GRB2/PIK3CD/PIK3AP1/NRG1/IRS2/AREG/HBEGF/EREG
heart	NOD1 2 SIGNALING PATHWAY	-1.72024	0.0342326	MAP2K6/BIRC2/CARD9/UBA52/NOD2/UBC/RPS27A/CYLD/CASP4/RIPK2/CASP1/TNFAIP3/BIRC3
heart	AP1 PATHWAY	-1.72407	0.0130345	PLAU/MAF/FOSL1/EP300/MAFG/CDK1/HLA-A/BCL2L11/PTEN/CCL2/ATF3/IL6/HIF1A/CDKN1B/JUNB/JUND/FOS/DUSP1/ELF1/TCF7L2/FOSB/EGR1/FOSL2/CXCL8
heart	NFAT TFPATHWAY	-1.73792	0.0323768	TNF/EGR4/PTPN1/GBP3/MAF/IL2RA/IRF4/EGR2/FOSL1/EGR3/JUNB/FOS/EGR1/CXCL8/PTGS2
heart	DISEASES ASSOCIATED WITH O GLYCOSYLATION OF PROTEINS	-1.73952	0.0239226	GALNT3/C1GALT1/CFP/THBS1
heart	ATF2 PATHWAY	-1.74003	0.0226884	PLAU/EP300/HES1/ATF3/IL23A/IL6/RB1/JDP2/JUNB/DDIT3/JUND/FOS/DUSP1/SOCS3/CXCL8
heart	INTEGRIN2 PATHWAY	-1.75188	0.0427702	FCGR2A/PLAU/ITGAL/ICAM4/C3/ICAM1/ICAM3/PLAUR
heart	IL12 2PATHWAY	-1.76275	0.0130393	IL2RA/GADD45B/RELB/JAK2/CCL3/HLA-A/STAT3/MAP2K3/NFKB2/SOCS1/CCL4/STAT1/NFKB1/FOS/RIPK2/IL1B
heart	DELTA NP63 PATHWAY	-1.76422	0.0394368	RUNX1/ADA/RRAD/BRCA2/AXL/RACK1/HES1/VDR/POU2F2/NRG1/CEBPD/IL1A/FOSL2
heart	IL 6 TYPE CYTOKINE RECEPTOR LIGAND INTERACTIONS	-1.80969	0.0417337	JAK1/IL6ST/JAK2/OSM
heart	CYTOKINE CYTOKINE RECEPTOR INTERACTION	-1.81678	4.80138e-06	IL6ST/FLT3LG/FAS/CXCL11/IL10RA/IL21R/IL7/TGFBR2/IL2RA/TNFRSF8/TNFRSF25/TNFSF13/IL4R/CCL3/CCR2/CX3CR1/IL1R2/CCL2/TNFSF13B/IL23A/CSF2RA/TNFRSF21/IL6/CXCL12/RELT/LTB/TNFRSF10B/CCL4/IL1RAP/CCL8/TNFSF10/CXCL10/CXCL3/CXCR4/TNFRSF1B/CCL4L2/CSF3R/IL1A/CXCL2/VEGFA/CXCL8/OSM/CCL20/IL1B
heart	TOLL ENDOGENOUS PATHWAY	-1.82834	0.0285005	HSPD1/TICAM1/TLR4/MYD88/TLR2/S100A9/S100A8/VCAN
heart	GPCR LIGAND BINDING	-1.83945	2.02561e-06	ADGRE2/ADRA2B/ADGRE3/PROK2/CCRL2/LTB4R/CCL3/GPR65/GPR35/LPAR6/CCR2/ECE1/CX3CR1/CYSLTR1/CCL2/CXCL12/PTGER4/ADGRE1/P2RY14/FFAR2/CCL4/HRH2/HCAR3/HCAR2/C3/GPR132/C5AR1/P2RY13/GPBAR1/CXCL10/CXCL3/CXCR4/GPR183/ADM/CXCL2/FPR1/FPR2/CD55/CXCL8/CCL20
heart	GAB1 SIGNALOSOME	-1.8402	0.0450964	GRB2/PAG1/AREG/HBEGF/EREG
heart	FOXO MEDIATED TRANSCRIPTION OF CELL CYCLE GENES	-1.86236	0.0323768	FOXO3/CDKN1B/KLF4/CDKN1A/BTG1
heart	PEPTIDE LIGAND BINDING RECEPTORS	-1.86846	0.000610513	PROK2/CCRL2/CCL3/CCR2/ECE1/CX3CR1/CCL2/CXCL12/CCL4/C3/C5AR1/CXCL10/CXCL3/CXCR4/CXCL2/FPR1/FPR2/CXCL8/CCL20
heart	EUKARYOTIC TRANSLATION INITIATION	-1.87102	9.51288e-05	RPLP1/RPL7A/EIF3M/RPL27A/EIF4E/RPL12/RPL8/EIF5/EIF3H/RPL36/EIF3F/RPLP2/EIF4B/UBA52/RPS2/RPS15/RPS21/RPL37A/RPS18/RPL7/RPS29/RPL9/RPS25/RPL11/EIF4A2/RPL19/RPL13/RPL3/RPS28/RPL39/RPL5/FAU/RPS27/RPS10/RPS19/RPL31/RPS7/RPL22/RPS20/RPL28/RPS14/RPL18A/EIF2S3/EIF3E/RPL27/RPL38/RPL32/RPS9/RPL6/RPS17/RPS23/EIF3A/RPS24/RPS12/RPL10A/RPS8/RPS3A/EIF3L/RPS16/RPL21/RPL22L1/RPL29/RPS3/RPS27A/RPS4X/RPL13A/RPS15A/…
heart	BIOCARTA LAIR PATHWAY	-1.87428	0.0297351	TNF/SELPLG/ITGAL/ITGA4/IL6/C3/ICAM1/IL1A/CXCL8
heart	ERBB2 REGULATES CELL MOTILITY	-1.87428	0.0361462	NRG1/HBEGF/EREG
heart	BIOCARTA GRANULOCYTES PATHWAY	-1.87903	0.0367492	TNF/SELPLG/ITGAL/PECAM1/ICAM1/IL1A/SELL/CXCL8
heart	CREATION OF C4 AND C2 ACTIVATORS	-1.87944	0.0269544	IGHG2/IGLC3/IGHG1/IGHG4/IGLC2/FCN1
heart	BIOCARTA ERYTH PATHWAY	-1.88537	0.0239226	KITLG/CCL3/IL6/IGF1/IL1A
heart	FRA PATHWAY	-1.8857	0.0138906	PLAU/FOSL1/EP300/CCL2/IL6/JUNB/JUND/THBD/PLAUR/FOSL2/CXCL8
heart	SELENOAMINO ACID METABOLISM	-1.88692	0.000232573	RPL36/RPLP2/UBA52/RPS2/RPS15/RPS21/RPL37A/RPS18/RPL7/RPS29/RPL9/RPS25/RPL11/RPL19/RPL13/RPL3/RPS28/RPL39/RPL5/FAU/RPS27/RPS10/RPS19/RPL31/RPS7/RPL22/PAPSS2/RPS20/RPL28/RPS14/RPL18A/RPL27/RPL38/RPL32/RPS9/RPL6/RPS17/RPS23/RPS24/RPS12/RPL10A/RPS8/RPS3A/RPS16/RPL21/RPL22L1/RPL29/RPS3/RPS27A/RPS4X/RPL13A/RPS15A/RPL4/RPL34/RPL26/RPL37/RPL17/RPS6/RPL23A/RPL18/RPL35A/RPL30/RPL23/RPL36A/RPL24/RPS11/RPS13
heart	NGF STIMULATED TRANSCRIPTION	-1.88762	0.00995823	ID3/EGR2/FOSL1/EP300/ID2/EGR3/JUNB/JUND/FOS/TRIB1/FOSB/EGR1
heart	ANTIMICROBIAL PEPTIDES	-1.8904	0.0284	CCR2/LYZ/SLC11A1/CLU/TLR2/S100A9/S100A8
heart	COMMON PATHWAY OF FIBRIN CLOT FORMATION	-1.8906	0.0323768	F5/F13A1/THBD
heart	PI3K EVENTS IN ERBB2 SIGNALING	-1.89176	0.033887	GRB2/NRG1/HBEGF/EREG
heart	BIOCARTA LYM PATHWAY	-1.92418	0.024047	ITGAL/ITGA4/PECAM1/ICAM1/IL1A/SELL/CXCL8
heart	BIOCARTA TNFR2 PATHWAY	-1.92815	0.0303442	RIPK1/TRAF1/MAP3K1/TANK/NFKB1/DUSP1/TNFRSF1B/NFKBIA/TNFAIP3
heart	EGFR DOWNREGULATION	-1.92935	0.0268053	EPS15/UBA52/EPN1/UBC/RPS27A/GRB2/SH3KBP1/AREG/HBEGF/EREG
heart	CYTOSOLIC DNA SENSING PATHWAY	-1.93835	0.00530456	IL6/CCL4/IRF7/NFKB1/CXCL10/CCL4L2/NFKBIA/CASP1/IL1B
heart	NONSENSE MEDIATED DECAY NMD	-1.94526	1.65086e-05	RPL36/RPLP2/UBA52/RPS2/RPS15/RPS21/RPL37A/RPS18/RPL7/RPS29/RPL9/RPS25/RPL11/RPL19/RPL13/RPL3/RPS28/RPL39/RPL5/FAU/RPS27/RPS10/RPS19/RPL31/RPS7/RPL22/RPS20/RPL28/RPS14/RPL18A/RPL27/RPL38/RPL32/RPS9/RPL6/RPS17/PNRC2/RPS23/RPS24/RPS12/RPL10A/RPS8/RPS3A/RPS16/RPL21/RPL22L1/RPL29/RPS3/RPS27A/RPS4X/RPL13A/RPS15A/RPL4/RPL34/RPL26/RPL37/RPL17/RPS6/RPL23A/RPL18/ETF1/RPL35A/RPL30/RPL23/RPL36A/RPL24/RPS11/R…
heart	BIOCARTA IL1R PATHWAY	-1.95307	0.0124089	MAP3K1/MYD88/IL6/MAP2K3/IL1RAP/NFKB1/NFKBIA/IL1A/IRAK3/IL1B
heart	CLASS A 1 RHODOPSIN LIKE RECEPTORS	-2.0058	2.02561e-06	ADRA2B/PROK2/CCRL2/LTB4R/CCL3/GPR65/GPR35/LPAR6/CCR2/ECE1/CX3CR1/CYSLTR1/CCL2/CXCL12/PTGER4/P2RY14/FFAR2/CCL4/HRH2/HCAR3/HCAR2/C3/GPR132/C5AR1/P2RY13/GPBAR1/CXCL10/CXCL3/CXCR4/GPR183/CXCL2/FPR1/FPR2/CXCL8/CCL20
heart	INTERLEUKIN 6 FAMILY SIGNALING	-2.01702	0.00972273	JAK1/IL6ST/JAK2/STAT3/IL6/STAT1/SOCS3/OSM
heart	BIOCARTA NTHI PATHWAY	-2.087	0.00455449	MAP2K6/TNF/TGFBR2/CREBBP/EP300/MYD88/MAP2K3/NFKB1/DUSP1/NFKBIA/CXCL8/IL1B
heart	IL23 PATHWAY	-2.10078	0.00622475	JAK2/CCL2/STAT3/IL23A/IL6/STAT1/NFKB1/SOCS3/NFKBIA/IL1B
heart	CHEMOKINE RECEPTORS BIND CHEMOKINES	-2.11279	0.00089874	CCRL2/CCL3/CCR2/CX3CR1/CCL2/CXCL12/CCL4/CXCL10/CXCL3/CXCR4/CXCL2/CXCL8/CCL20
heart	INTERLEUKIN 10 SIGNALING	-2.17662	0.000568797	CCL3/CCR2/IL1R2/CCL2/STAT3/IL6/CCL4/CXCL10/TNFRSF1B/ICAM1/IL1A/CXCL2/FPR1/CXCL8/CCL20/PTGS2/IL1B
heart	O GLYCOSYLATION OF TSR DOMAIN CONTAINING PROTEINS	-2.17804	0.000903964	ADAMTS5/CFP/THBS1
heart	NOD LIKE RECEPTOR SIGNALING PATHWAY	-2.17988	2.01762e-05	CCL2/IL6/MEFV/CCL8/NFKB1/RIPK2/NAIP/NFKBIA/CXCL2/CASP1/CXCL8/TNFAIP3/BIRC3/IL1B/NLRP3
heart	ERBB NETWORK PATHWAY	-2.18028	3.36273e-05	NRG1/AREG/HBEGF/EREG
heart	INTERFERON ALPHA BETA SIGNALING	-2.26387	2.04023e-05	JAK1/HLA-E/USP18/OAS2/HLA-C/IFI35/GBP2/PTPN1/ADAR/IRF4/IFIT1/RSAD2/PSMB8/IFIT3/BST2/HLA-B/HLA-A/MX1/OASL/SOCS1/XAF1/STAT1/IRF7/ISG15/IRF1/HLA-F/ISG20/MX2/IFIT2/IFITM3/IFITM2/SOCS3/IFITM1/EGR1
heart	RESPONSE OF EIF2AK4 GCN2 TO AMINO ACID DEFICIENCY	-2.37431	4.29e-08	RPL36/RPLP2/UBA52/RPS2/RPS15/RPS21/RPL37A/RPS18/ATF4/RPL7/RPS29/RPL9/RPS25/RPL11/RPL19/RPL13/RPL3/RPS28/RPL39/RPL5/FAU/RPS27/RPS10/RPS19/RPL31/RPS7/RPL22/RPS20/RPL28/RPS14/RPL18A/EIF2S3/RPL27/RPL38/RPL32/RPS9/RPL6/RPS17/RPS23/RPS24/RPS12/RPL10A/RPS8/RPS3A/RPS16/RPL21/RPL22L1/RPL29/RPS3/RPS27A/RPS4X/RPL13A/RPS15A/RPL4/RPL34/RPL26/RPL37/RPL17/RPS6/RPL23A/RPL18/RPL35A/RPL30/RPL23/RPL36A/RPL24/RPS11/…
heart	RIBOSOME	-2.44044	4.29e-08	RPL41/RPLP1/RPL7A/RPL27A/RPL12/RPL8/RPL36/RPLP2/UBA52/RPS2/RPS15/RPS21/RPL37A/RPS18/RPL7/RPS29/RPL9/RPS25/RPL11/RPL19/RPL13/RPL3/RPS28/RPL39/RPL5/FAU/RPS27/RPS10/RPS19/RPL31/RPS7/RPL22/RPS20/RPL28/RPL18A/RPL27/RPL38/RPL32/RPS9/RPL6/RPS17/RPS23/RPS24/RPS12/RPL10A/RPS8/RPS3A/RPS16/RPL21/RPL22L1/RPL29/RPS3/RPS27A/RPS4X/RPL13A/RPS15A/RPL4/RPL34/RPL26/RPL37/RPL17/RPS6/RPL23A/RPL18/RPL35A/RPL30/RPL23/R…
heart	EUKARYOTIC TRANSLATION ELONGATION	-2.48666	4.29e-08	RPL41/EEF1A1/RPLP1/RPL7A/RPL27A/RPL12/RPL8/RPL36/RPLP2/UBA52/RPS2/RPS15/RPS21/RPL37A/RPS18/RPL7/RPS29/RPL9/RPS25/RPL11/RPL19/RPL13/RPL3/RPS28/RPL39/RPL5/FAU/RPS27/RPS10/RPS19/RPL31/RPS7/RPL22/RPS20/RPL28/RPS14/RPL18A/RPL27/RPL38/RPL32/RPS9/RPL6/RPS17/RPS23/RPS24/RPS12/RPL10A/RPS8/RPS3A/EEF2/RPS16/RPL21/RPL22L1/RPL29/RPS3/RPS27A/RPS4X/RPL13A/RPS15A/RPL4/RPL34/RPL26/RPL37/RPL17/RPS6/RPL23A/RPL18/RP…
skin	OXIDATIVE PHOSPHORYLATION	2.13306	2.02875e-08	ATP6V1F/TCIRG1/NDUFB7/ATP6AP1/UQCR11/NDUFC2/NDUFA9/COX5B/NDUFB9/NDUFA4/COX5A/COX8A/CYC1/NDUFA11/NDUFS8/NDUFA8/ATP6V1G1/UQCRQ/COX7A2/COX6A1/UQCR10/NDUFB2/UQCRC1/NDUFAB1/NDUFS6/UQCRH/NDUFS5/ATP6V0C/ATP6V1E1/COX6B1/NDUFB5/NDUFB8/COX6C/NDUFA7/SDHB/NDUFS7/NDUFA1/COX7B/ATP6V0E2/NDUFB4/SDHD/ATP6V1B2/ATP6V0B/NDUFS3/NDUFA6/COX7A2L/NDUFC1/UQCRFS1/NDUFV2/NDUFB3/NDUFB6/ATP6V0A1/UQCRB/NDUFA3/ATP6V0E1/UQCRC2/N…
skin	RESPIRATORY ELECTRON TRANSPORT	2.10112	2.02875e-08	NDUFB7/UQCR11/NDUFC2/NDUFA9/COX5B/NDUFB9/NDUFA4/COX5A/COX8A/NDUFA13/CYC1/NDUFA11/NDUFS8/NDUFA8/UQCRQ/COX6A1/UQCR10/NDUFB2/UQCRC1/NDUFAB1/NDUFS6/UQCRH/NDUFS5/COX20/COX6B1/NDUFB11/NDUFB5/NDUFB8/ETFB/COX6C/NDUFA7/SDHB/COX14/NDUFS7/NDUFA1/COX7B/NDUFB4/SDHD/NDUFS3/NDUFA6/COX7A2L/NDUFC1/SURF1/UQCRFS1/NDUFV2/NDUFB3/NDUFB6/UQCRB/TRAP1/NDUFA3/TACO1/UQCRC2/NDUFV1/ETFA/COX4I1/SDHC/SDHA/NDUFB10/NDUFA5/NDUFS4…
skin	RESPIRATORY ELECTRON TRANSPORT ATP SYNTHESIS BY CHEMIOSMOTIC COUPLING AND HEAT PRODUCTION BY UNCOUPLING PROTEINS	2.09189	2.02875e-08	NDUFB7/UQCR11/NDUFC2/NDUFA9/COX5B/NDUFB9/NDUFA4/COX5A/COX8A/NDUFA13/CYC1/NDUFA11/NDUFS8/NDUFA8/UQCRQ/COX6A1/UQCR10/NDUFB2/UQCRC1/NDUFAB1/NDUFS6/UQCRH/NDUFS5/COX20/COX6B1/NDUFB11/NDUFB5/NDUFB8/ETFB/COX6C/NDUFA7/SDHB/COX14/NDUFS7/NDUFA1/COX7B/NDUFB4/SDHD/NDUFS3/UCP2/NDUFA6/COX7A2L/NDUFC1/SURF1/UQCRFS1/NDUFV2/NDUFB3/NDUFB6/UQCRB/TRAP1/NDUFA3/TACO1/UQCRC2/NDUFV1/ETFA/COX4I1/SDHC/SDHA/NDUFB10/NDUFA5/N…
skin	PARKINSONS DISEASE	2.05465	2.02875e-08	NDUFB7/UQCR11/NDUFC2/NDUFA9/COX5B/NDUFB9/NDUFA4/COX5A/VDAC1/COX8A/CYC1/NDUFS8/NDUFA8/UQCRQ/COX7A2/COX6A1/UQCR10/NDUFB2/UQCRC1/NDUFAB1/NDUFS6/UQCRH/NDUFS5/COX6B1/PARK7/SLC25A5/NDUFB5/NDUFB8/COX6C/NDUFA7/SDHB/VDAC2/NDUFS7/NDUFA1/COX7B/NDUFB4/SDHD/NDUFS3/NDUFA6/COX7A2L/NDUFC1/SLC25A6/UQCRFS1/NDUFV2/NDUFB3/NDUFB6/UQCRB/NDUFA3/UQCRC2/NDUFV1/COX4I1/SDHC/SDHA/NDUFB10/NDUFA5/CASP3/NDUFS4/PPID/VDAC3/UBE2J1
skin	THE CITRIC ACID TCA CYCLE AND RESPIRATORY ELECTRON TRANSPORT	2.03837	2.02875e-08	SLC16A3/NDUFB7/UQCR11/NDUFC2/NDUFA9/COX5B/NDUFB9/NDUFA4/COX5A/MPC2/VDAC1/COX8A/NDUFA13/CYC1/NDUFA11/NDUFS8/NDUFA8/UQCRQ/COX6A1/UQCR10/NDUFB2/SUCLG1/UQCRC1/NDUFAB1/NDUFS6/UQCRH/NDUFS5/COX20/COX6B1/ME3/LDHB/MDH2/NDUFB11/LDHA/CS/NDUFB5/NDUFB8/IDH2/ETFB/COX6C/NDUFA7/SDHB/COX14/NDUFS7/NDUFA1/COX7B/NDUFB4/SDHD/PDHB/NDUFS3/UCP2/NDUFA6/COX7A2L/NDUFC1/SURF1/BSG/UQCRFS1/NDUFV2/FH/NDUFB3/NDUFB6/MPC1/GLO1/UQ…
skin	ALZHEIMERS DISEASE	1.96725	2.02875e-08	LPL/APOE/CALM3/NDUFB7/UQCR11/NDUFC2/NDUFA9/COX5B/NDUFB9/NDUFA4/COX5A/COX8A/CYC1/NDUFS8/NDUFA8/UQCRQ/COX7A2/COX6A1/UQCR10/NDUFB2/UQCRC1/NDUFAB1/NDUFS6/UQCRH/NDUFS5/PSEN2/PSENEN/COX6B1/GAPDH/APH1A/NDUFB5/NDUFB8/COX6C/NDUFA7/SDHB/NCSTN/NDUFS7/NDUFA1/COX7B/NDUFB4/ADAM10/SDHD/BAD/NDUFS3/NDUFA6/COX7A2L/NDUFC1/BACE1/UQCRFS1/NDUFV2/NDUFB3/NDUFB6/CAPN2/MAPK3/UQCRB/NDUFA3/CAPN1/UQCRC2/NDUFV1/COX4I1/SDHC/CA…
skin	CARDIAC MUSCLE CONTRACTION	1.93695	2.27067e-05	UQCR11/COX5B/COX5A/COX8A/CYC1/UQCRQ/COX7A2/COX6A1/UQCR10/UQCRC1/TPM4/UQCRH/COX6B1/COX6C/COX7B/CACNA2D4/COX7A2L/UQCRFS1/UQCRB/UQCRC2/COX4I1/SLC9A6/TPM3
skin	HUNTINGTONS DISEASE	1.91831	2.02875e-08	AP2S1/NDUFB7/UQCR11/NDUFC2/NDUFA9/COX5B/NDUFB9/NDUFA4/COX5A/VDAC1/COX8A/CYC1/POLR2L/NDUFS8/NDUFA8/BAX/UQCRQ/COX7A2/POLR2E/COX6A1/UQCR10/NDUFB2/UQCRC1/NDUFAB1/NDUFS6/CLTB/UQCRH/POLR2F/NDUFS5/COX6B1/SLC25A5/NDUFB5/NDUFB8/AP2M1/TFAM/COX6C/NDUFA7/SDHB/VDAC2/NDUFS7/NDUFA1/COX7B/NDUFB4/SDHD/NDUFS3/NDUFA6/COX7A2L/NDUFC1/SLC25A6/UQCRFS1/NDUFV2/NDUFB3/NDUFB6/CLTA/UQCRB/NDUFA3/AP2B1/UQCRC2/NDUFV1/COX4I1/SD…
skin	PPAR SIGNALING PATHWAY	1.9106	4.00398e-05	FABP4/LPL/CYP27A1/FABP5/DBI/CD36/NR1H3/FABP3/OLR1/ACADM/SCP2
skin	GLUTATHIONE METABOLISM	1.87772	0.000404211	MGST3/GSTO1/SRM/PGD/GCLC/GPX4/GSTP1/GGCT/ANPEP/IDH2/GSTK1/SMS/MGST2/GSR/G6PD/IDH1/LAP3/MGST1
skin	COMPLEX I BIOGENESIS	1.86645	4.76365e-05	NDUFB7/NDUFC2/NDUFA9/NDUFB9/NDUFA13/NDUFA11/NDUFS8/NDUFA8/NDUFB2/NDUFAB1/NDUFS6/NDUFS5/NDUFB11/NDUFB5/NDUFB8/NDUFA7/NDUFS7/NDUFA1/NDUFB4/NDUFS3/NDUFA6/NDUFC1/NDUFV2/NDUFB3/NDUFB6/NDUFA3/NDUFV1/NDUFB10/NDUFA5/NDUFS4/NDUFAF3/NDUFS1/NDUFA12
skin	MITOCHONDRIAL TRANSLATION	1.85367	9.33928e-07	MRPL15/MRPL57/MRPL43/MRPL40/MRPL41/MRPL4/AURKAIP1/MRPL34/MRPS23/MRPL17/MRPL52/MRPL12/MRPS25/TUFM/MRPL54/MRPS12/MRPL3/MRPS16/MRPS34/MRPS15/MRPL21/MRPS7/MRPS14/MRPL2/MRPL51/MRPL20/MRPS2/MRPL37/MRPS18B/DAP3/MRPL13/GADD45GIP1/MRPS33/CHCHD1/MRPL33/MRPL11/MRPS36/MRPL23/MRPS21/MRPS35/MRPL10/MRPS9/MTIF2/MRPL22/MRPL47/MRPS26/MRPL35/MRPL36/MRPL32/MRPL18/MRPL45/MRPS18C/MRPS10/MRPL27/MRPL39/MRPS5/ERAL1/MRPL5…
skin	LYSOSOME	1.83968	8.89376e-08	LIPA/ACP5/CTSD/GUSB/CTSK/TCIRG1/GM2A/HEXB/CD68/ATP6AP1/ACP2/SCARB2/CTSH/CTSB/AP3S1/LAPTM5/LAMP1/ASAH1/PPT1/CTSZ/DNASE2/CLTB/CD63/ATP6V0C/SORT1/GNS/CTSA/GAA/GLB1/HEXA/LAMP2/ARSA/ATP6V0B/DNASE2B/CTSL/CLTA/ATP6V0A1/NPC1/AGA/AP3D1/CTSO/AP1S1/NPC2/SGSH/ATP6V0D2/NAGLU/AP3B1/MCOLN1/GGA1/PLA2G15/GBA/SMPD1/AP1S3/CTSF/NAGPA/SLC11A1/GALNS/ATP6V0D1/GGA2/SUMF1/PSAP/SLC17A5
skin	PLASMA LIPOPROTEIN CLEARANCE	1.83964	0.00131021	APOC1/LIPA/APOE/NCEH1/AP2S1/NR1H3/APOBR/AP2M1/CLTA/NPC1/AP2B1/NPC2/SCARB1/SOAT1
skin	GLUCONEOGENESIS	1.83365	0.00126091	FBP1/ENO1/PGAM1/PGK1/GAPDH/MDH2/TPI1/SLC25A11/PC/MDH1/G6PC3/GOT2/ALDOA
skin	LDL CLEARANCE	1.83079	0.00284212	LIPA/NCEH1/AP2S1/AP2M1/CLTA/NPC1/AP2B1/NPC2/SOAT1
skin	CITRIC ACID CYCLE TCA CYCLE	1.82706	0.00191164	SUCLG1/ME3/MDH2/CS/IDH2/SDHB/SDHD/FH/SDHC/SDHA/IDH3B/NNT/DLD/IDH3G/SUCLA2/FAHD1/IDH3A/DLST/ME2
skin	PROTEASOME	1.82208	0.000325002	PSMA7/PSMA5/PSMB6/PSMD8/PSMD4/PSMB1/PSMD6/PSMD7/SEM1/PSMD3/PSMD13/PSMD14/PSMC3/PSMB5/PSMB2/PSMA2/PSMC5/PSMB4/PSMA1/POMP/PSMA6/PSME2/PSMD2/PSMD12/PSMA4/PSMB3/PSMA3/PSMB8/PSMB7/PSMC4/PSMC1
skin	PLASMA LIPOPROTEIN ASSEMBLY REMODELING AND CLEARANCE	1.81975	0.000429411	LPL/APOC1/LIPA/APOE/A2M/NCEH1/AP2S1/P4HB/NR1H3/APOBR/APOC2/AP2M1/CLTA/NPC1/AP2B1/NPC2/SCARB1/SOAT1
skin	PLASMA LIPOPROTEIN ASSEMBLY	1.81081	0.00277025	APOC1/APOE/A2M/P4HB/APOC2
skin	CITRATE CYCLE TCA CYCLE	1.80899	0.00270394	SUCLG1/MDH2/CS/IDH2/PC/MDH1/SDHB/SDHD/PDHB/FH/IDH1/SDHC/SDHA/IDH3B/DLD/ACO1/IDH3G/SUCLA2/IDH3A/DLST/PDHA1
skin	NEGATIVE REGULATION OF NOTCH4 SIGNALING	1.80039	0.000432061	PSMA7/PSMA5/PSMB6/PSMD8/PSMD4/PSMB1/PSMD6/PSMD7/SEM1/RBX1/PSMD3/PSMD13/PSMD14/PSMC3/SKP1/PSMB5/PSMB2/PSMA2/PSMC5/PSMB4/PSMA1/AKT1/PSMA6/PSME2/PSMD2/PSMD12/PSMA4/PSMB3/PSMA3/PSMD10/PSMB8/PSMB7/PSMC4/UBA52/PSMC1
skin	GLYCOLYSIS GLUCONEOGENESIS	1.79479	0.0013482	FBP1/PKM/ENO1/ALDH3B1/GALM/PGAM1/PGK1/GAPDH/LDHB/TPI1/PFKP/LDHA/PFKL/PDHB/AKR1A1/ALDH2/ALDOA/DLD/BPGM/HK1
skin	HEDGEHOG LIGAND BIOGENESIS	1.79147	0.000325002	PSMA7/P4HB/PSMA5/PSMB6/PSMD8/PSMD4/PSMB1/PSMD6/PSMD7/SEM1/PSMD3/PSMD13/PSMD14/PSMC3/PSMB5/PSMB2/PSMA2/PSMC5/PSMB4/PSMA1/PSMA6/PSME2/PSMD2/PSMD12/PSMA4/PSMB3/PSMA3/PSMD10/PSMB8/PSMB7/PSMC4/UBA52/PSMC1/SEL1L/ADAM17/PSME3/VCP
skin	TRANSFERRIN ENDOCYTOSIS AND RECYCLING	1.78691	0.0068394	ATP6V1F/TCIRG1/TFRC/ATP6AP1/ATP6V1G1/STEAP3/ATP6V0C/ATP6V1E1/ATP6V0E2/ATP6V1B2/ATP6V0B/ATP6V0A1/ATP6V0E1/ATP6V0D2/MCOLN1
skin	BIOCARTA PROTEASOME PATHWAY	1.78396	0.00474572	PSMA7/PSMA5/PSMB6/PSMB1/PSMB5/PSMB2/PSMA2/RPN2/PSMB4/RPN1/PSMA1/PSMA6/PSMA4/PSMB3/PSMA3/PSMB7
skin	CDT1 ASSOCIATION WITH THE CDC6 ORC ORIGIN COMPLEX	1.77807	0.000572049	PSMA7/PSMA5/PSMB6/PSMD8/PSMD4/PSMB1/PSMD6/PSMD7/SEM1/PSMD3/PSMD13/PSMD14/PSMC3/PSMB5/PSMB2/PSMA2/PSMC5/PSMB4/PSMA1/GMNN/PSMA6/PSME2/PSMD2/PSMD12/PSMA4/PSMB3/PSMA3/PSMD10/PSMB8/PSMB7/PSMC4/UBA52/PSMC1/ORC3/PSME3
skin	SCF SKP2 MEDIATED DEGRADATION OF P27 P21	1.77768	0.000432061	PSMA7/PSMA5/PSMB6/PSMD8/PSMD4/PSMB1/PSMD6/PSMD7/SEM1/PSMD3/PSMD13/PSMD14/PSMC3/SKP1/PSMB5/PSMB2/PSMA2/PSMC5/PSMB4/PSMA1/CKS1B/CDK4/PSMA6/PSME2/PSMD2/PSMD12/PSMA4/PSMB3/PSMA3/PSMD10/PSMB8/PSMB7/PSMC4/UBA52/PSMC1
skin	PYRUVATE METABOLISM AND CITRIC ACID TCA CYCLE	1.77559	0.000631171	SLC16A3/MPC2/VDAC1/SUCLG1/ME3/LDHB/MDH2/LDHA/CS/IDH2/SDHB/SDHD/PDHB/BSG/FH/MPC1/GLO1/SDHC/SDHA/IDH3B/NNT/DLD/IDH3G/SUCLA2/FAHD1/IDH3A/DLST/PDHA1/ME2/GSTZ1
skin	REGULATION OF RAS BY GAPS	1.77559	0.000193239	PSMA7/PSMA5/PSMB6/PSMD8/PSMD4/PSMB1/PSMD6/PSMD7/SEM1/RBX1/PSMD3/RASA1/PSMD13/PSMD14/PSMC3/PSMB5/PSMB2/PSMA2/PSMC5/PSMB4/PSMA1/RASA3/RASAL2/PSMA6/PSME2/PSMD2/PSMD12/PSMA4/PSMB3/PSMA3/KRAS/PSMD10/PSMB8/PSMB7/PSMC4/UBA52/PSMC1/HRAS/RASAL3/PSME3
skin	DEGRADATION OF GLI1 BY THE PROTEASOME	1.77325	0.000432061	PSMA7/PSMA5/PSMB6/PSMD8/PSMD4/PSMB1/PSMD6/PSMD7/SEM1/RBX1/PSMD3/PSMD13/PSMD14/PSMC3/SKP1/PSMB5/PSMB2/PSMA2/PSMC5/PSMB4/PSMA1/PSMA6/PSME2/PSMD2/PSMD12/PSMA4/PSMB3/PSMA3/PSMD10/PSMB8/PSMB7/PSMC4/UBA52/PSMC1
skin	REGULATION OF HMOX1 EXPRESSION AND ACTIVITY	1.76855	0.000232227	HM13/PSMA7/PSMA5/PSMB6/PSMD8/PSMD4/CSNK2B/PSMB1/PSMD6/PSMD7/SEM1/RBX1/PSMD3/PSMD13/PSMD14/PSMC3/SKP1/PSMB5/PSMB2/PSMA2/PSMC5/PSMB4/HMOX1/PSMA1/PSMA6/PSME2/PSMD2/PSMD12/PSMA4/PSMB3/PSMA3/PSMD10/PSMB8/FBXL17/PSMB7/PSMC4/UBA52/PSMC1/KEAP1/PSME3
skin	DECTIN 1 MEDIATED NONCANONICAL NF KB SIGNALING	1.76478	0.00043467	PSMA7/PSMA5/PSMB6/PSMD8/PSMD4/PSMB1/PSMD6/PSMD7/SEM1/PSMD3/PSMD13/PSMD14/PSMC3/SKP1/PSMB5/PSMB2/PSMA2/PSMC5/CCL22/PSMB4/PSMA1/PSMA6/PSME2/PSMD2/PSMD12/PSMA4/PSMB3/PSMA3/CHUK/PSMD10/PSMB8/PSMB7/PSMC4/UBA52/PSMC1
skin	METABOLISM OF POLYAMINES	1.75752	0.000842045	PSMA7/SRM/PSMA5/PSMB6/PSMD8/PSMD4/PSMB1/PSMD6/PSMD7/SEM1/PSMD3/PSMD13/PSMD14/PSMC3/PSMB5/NQO1/PSMB2/PSMA2/SMS/PSMC5/PSMB4/PSMA1/PSMA6/PSME2/PSMD2/PSMD12/PSMA4/PSMB3/PSMA3/PSMD10/PSMB8/PSMB7/PSMC4/OAZ1/PSMC1
skin	DEGRADATION OF DVL	1.75569	0.00117168	PSMA7/PSMA5/PSMB6/PSMD8/PSMD4/PSMB1/PSMD6/PSMD7/SEM1/RBX1/PSMD3/PSMD13/PSMD14/PSMC3/PSMB5/PSMB2/PSMA2/PSMC5/PSMB4/PSMA1/PSMA6/PSME2/PSMD2/PSMD12/PSMA4/PSMB3/PSMA3/PSMD10/PSMB8/PSMB7/PSMC4/UBA52/PSMC1/PSME3/PSMC2/PSMB10/DVL1/PSME4
skin	DEGRADATION OF THE EXTRACELLULAR MATRIX	1.75507	0.000193239	SPP1/FN1/CTSD/A2M/CTSK/COL6A2/COL6A1/MMP19/MMP9/CTSB/TIMP2/MMP7/NCSTN/ADAM10/CTSL/BSG/CAPN2/CAPN1/LAMC1/MMP2/CAPN15/CASP3/MMP14
skin	PLASMA LIPOPROTEIN REMODELING	1.7523	0.00726641	LPL/APOE/P4HB/APOC2
skin	AUF1 HNRNP D0 BINDS AND DESTABILIZES MRNA	1.74672	0.00123663	PSMA7/PSMA5/PSMB6/PSMD8/PSMD4/PSMB1/PSMD6/PSMD7/SEM1/PSMD3/PSMD13/PSMD14/HSPB1/PSMC3/PSMB5/PSMB2/PSMA2/PSMC5/PSMB4/PSMA1/EIF4G1/PSMA6/PSME2/PSMD2/PSMD12/PSMA4/PSMB3/PSMA3/PSMD10/PSMB8/PSMB7/PSMC4/UBA52/PSMC1/PSME3/PSMC2/PSMB10/HSPA8/PSME4
skin	ORC1 REMOVAL FROM CHROMATIN	1.74596	0.000429411	PSMA7/PSMA5/PSMB6/PSMD8/PSMD4/PSMB1/PSMD6/PSMD7/SEM1/RBX1/PSMD3/PSMD13/PSMD14/PSMC3/SKP1/PSMB5/PSMB2/PSMA2/PSMC5/PSMB4/PSMA1/PSMA6/PSME2/PSMD2/PSMD12/PSMA4/PSMB3/PSMA3/PSMD10/PSMB8/PSMB7/PSMC4/UBA52/PSMC1/ORC3/MCM5/PSME3/PSMC2/MCM6/PSMB10
skin	ASYMMETRIC LOCALIZATION OF PCP PROTEINS	1.74221	0.00139543	PSMA7/PSMA5/PSMB6/PSMD8/PSMD4/PSMB1/PSMD6/PSMD7/SEM1/PSMD3/PSMD13/PSMD14/PSMC3/PSMB5/PSMB2/PSMA2/PSMC5/PSMB4/PSMA1/PSMA6/PSME2/PSMD2/PSMD12/PSMA4/PSMB3/PSMA3/PSMD10/PSMB8/PSMB7/PSMC4/UBA52/PSMC1/SMURF1/PSME3
skin	MITOCHONDRIAL FATTY ACID BETA OXIDATION	1.74185	0.00851825	DBI/ACAA2/ECHS1/DECR1/NDUFAB1/ACADM/ECI1/HADH/ACOT7/ACOT13/ACADVL/ACADS/ACOT2/HADHA/ACOT9/PCCB/HADHB/MCAT
skin	VIBRIO CHOLERAE INFECTION	1.73333	0.0027645	ATP6V1F/TCIRG1/ATP6AP1/ATP6V1G1/SEC61G/ATP6V0C/ATP6V1E1/SEC61B/ACTG1/PDIA4/ATP6V0E2/ADCY3/ATP6V1B2/ATP6V0B/KDELR2/GNAS/ATP6V0A1/ATP6V0E1/ATP6V0D2/KDELR1/ARF1/ERO1A
skin	TRIGLYCERIDE CATABOLISM	1.72953	0.00989316	FABP4/FABP5/MGLL/FABP3/ABHD5/PPP1CA/GPD2/PPP1CC/PLIN3/CAV1
skin	TRIGLYCERIDE METABOLISM	1.72629	0.016816	FABP4/FABP5/MGLL/FABP3/ABHD5/PPP1CA/GPD2/PPP1CC/PLIN3/CAV1
skin	REGULATION OF RUNX3 EXPRESSION AND ACTIVITY	1.71692	0.00166736	PSMA7/PSMA5/PSMB6/PSMD8/PSMD4/PSMB1/PSMD6/PSMD7/SEM1/PSMD3/PSMD13/PSMD14/PSMC3/PSMB5/PSMB2/PSMA2/PSMC5/PSMB4/PSMA1/PSMA6/PSME2/PSMD2/PSMD12/PSMA4/PSMB3/PSMA3/PSMD10/PSMB8/PSMB7/PSMC4/UBA52/PSMC1/SMURF1/PSME3/MDM2/PSMC2
skin	DEFECTIVE CFTR CAUSES CYSTIC FIBROSIS	1.71299	0.00154698	PSMA7/PSMA5/PSMB6/PSMD8/PSMD4/PSMB1/PSMD6/PSMD7/SEM1/PSMD3/PSMD13/PSMD14/PSMC3/PSMB5/PSMB2/PSMA2/PSMC5/PSMB4/PSMA1/DERL1/PSMA6/PSME2/PSMD2/PSMD12/PSMA4/PSMB3/PSMA3/PSMD10/PSMB8/PSMB7/PSMC4/UBA52/PSMC1/SEL1L/PSME3/VCP
skin	INSULIN RECEPTOR RECYCLING	1.71075	0.0217928	ATP6V1F/TCIRG1/ATP6AP1/ATP6V1G1/ATP6V0C/ATP6V1E1/ATP6V0E2/ATP6V1B2/ATP6V0B/ATP6V0A1/ATP6V0E1/ATP6V0D2
skin	EPH EPHRIN MEDIATED REPULSION OF CELLS	1.70982	0.00635365	AP2S1/MMP9/CLTB/PSEN2/PSENEN/ACTG1/EPHB2/APH1A/AP2M1/NCSTN/ADAM10/CLTA/TIAM1/AP2B1/MMP2
skin	DEGRADATION OF AXIN	1.70708	0.00258493	PSMA7/PSMA5/PSMB6/PSMD8/PSMD4/PSMB1/PSMD6/PSMD7/SEM1/PSMD3/PSMD13/PSMD14/PSMC3/PSMB5/PSMB2/PSMA2/PSMC5/PSMB4/PSMA1/PSMA6/PSME2/PSMD2/PSMD12/PSMA4/PSMB3/PSMA3/PSMD10/PSMB8/PSMB7/PSMC4/UBA52/PSMC1/PSME3/AXIN1
skin	THE ROLE OF GTSE1 IN G2 M PROGRESSION AFTER G2 CHECKPOINT	1.70525	0.000904743	PSMA7/PSMA5/PSMB6/PSMD8/PSMD4/PSMB1/PSMD6/PSMD7/SEM1/TUBA1C/PSMD3/TUBB6/PSMD13/PSMD14/PSMC3/PSMB5/PSMB2/PSMA2/PSMC5/PSMB4/PSMA1/TUBB4B/TUBA1A/PSMA6/PSME2/PSMD2/PSMD12/PSMA4/PSMB3/PSMA3/PSMD10/PSMB8/PSMB7/PSMC4/UBA52/PSMC1/PSME3/TUBA1B/PSMC2
skin	CELLULAR RESPONSE TO CHEMICAL STRESS	1.70261	3.68525e-06	HM13/ATOX1/PSMA7/P4HB/COX5B/NDUFA4/COX5A/TXN/COX8A/PSMA5/PSMB6/PRDX5/PSMD8/COX6A1/PSMD4/CSNK2B/PRDX1/PSMB1/PSMD6/GSTP1/COX20/COX6B1/PSMD7/BLVRB/SEM1/PRDX3/RBX1/PSMD3/PSMD13/PSMD14/PSMC3/TXN2/COX6C/COX14/SKP1/COX7B/PSMB5/PSMB2/COX7A2L/PSMA2/SURF1/PSMC5/GSR/PSMB4/PRDX6/NCF1/HMOX1/TACO1/COX4I1/PSMA1/TXNRD2/CYBA/LRPPRC/ERO1A/PSMA6/HDAC3/PSME2/PSMD2/PSMD12/SOD1/PSMA4/PSMB3/PSMA3/PSMD10/PSMB8/CHD9/FBXL…
skin	HEDGEHOG OFF STATE	1.70242	0.00019258	PSMA7/PSMA5/PSMB6/PSMD8/PSMD4/PSMB1/PSMD6/PSMD7/SEM1/TUBA1C/RBX1/PSMD3/TUBB6/PSMD13/PSMD14/PSMC3/SKP1/PSMB5/ADCY3/PSMB2/PSMA2/PSMC5/GNAS/PRKAR2A/PRKAR1B/PSMB4/PSMA1/TUBB4B/TUBA1A/IFT52/PSMA6/PSME2/PSMD2/PSMD12/PSMA4/PSMB3/PSMA3/PSMD10/PRKAR1A/PSMB8/GPR161/PSMB7/PSMC4/UBA52/PSMC1
skin	EPH EPHRIN SIGNALING	1.70145	0.00109256	SDC2/AP2S1/MMP9/CLTB/PSEN2/PSENEN/MYL9/ACTG1/ACTR3/EPHB2/APH1A/RASA1/AP2M1/ARPC3/ARPC2/ARPC1B/NCSTN/CFL1/MYL6/ADAM10/MYL12A/RHOA/CLTA/TIAM1/AP2B1/MYL12B/MMP2/LIMK1/ARPC5/ARPC4/SDCBP/CDC42
skin	APC C CDH1 MEDIATED DEGRADATION OF CDC20 AND OTHER APC C CDH1 TARGETED PROTEINS IN LATE MITOSIS EARLY G1	1.70064	0.00128989	PSMA7/ANAPC11/ANAPC15/PSMA5/PSMB6/PSMD8/PSMD4/PSMB1/PSMD6/PSMD7/SEM1/PSMD3/PSMD13/PSMD14/PSMC3/PSMB5/PSMB2/PSMA2/PSMC5/ANAPC5/CDC26/PSMB4/PTTG1/PSMA1/CDC20/PSMA6/PSME2/PSMD2/PSMD12/PSMA4/PSMB3/PSMA3/PSMD10/PSMB8/ANAPC10/PSMB7/PSMC4/UBA52/PSMC1/PSME3/UBE2S
skin	PCP CE PATHWAY	1.69822	0.000488036	PSMA7/AP2S1/PSMA5/PSMB6/PSMD8/PSMD4/CLTB/PSMB1/PSMD6/PSMD7/SEM1/PSMD3/AP2M1/PSMD13/PSMD14/PSMC3/PFN1/RAC2/PSMB5/PSMB2/PSMA2/PSMC5/RHOA/CLTA/PSMB4/AP2B1/PSMA1/PSMA6/PSME2/PSMD2/PSMD12/PSMA4/PSMB3/PSMA3/PSMD10/PSMB8/PSMB7/PSMC4/UBA52/PSMC1/SMURF1/RYK/PSME3/ARRB2/PSMC2/PSMB10/DVL1
skin	TRANSLATION	1.68973	2.02875e-08	RPS27L/SSR3/MRPL15/SSR4/SEC11C/SEC61G/MRPL57/MRPL43/MRPL40/EIF4EBP1/MRPL41/MRPL4/AURKAIP1/MRPL34/MRPS23/MRPL17/SEC61B/MRPL52/EIF3M/RPSA/MRPL12/MRPS25/TUFM/MRPL54/RPS26/DDOST/MRPS12/SPCS2/MRPL3/MRPS16/MRPS34/EIF3K/MRPS15/RPS28/MRPL21/MRPS7/MRPS14/MRPL2/RPL41/SRP14/MRPL51/EIF2B4/MRPL20/RPN2/MRPS2/SSR2/RPL22L1/MRPL37/TRMT112/MRPS18B/RPLP0/APEH/DAP3/SRP72/MRPL13/GSPT1/RPN1/RPL7/RPL3/GADD45GIP1/SPCS1/…
skin	DRUG METABOLISM CYTOCHROME P450	1.68739	0.01549	MGST3/GSTO1/ALDH3B1/GSTP1/GSTK1/MGST2/MGST1
skin	METABOLISM OF FAT SOLUBLE VITAMINS	1.68642	0.0199823	LPL/APOE/SDC2/GPC4/SDC4/APOC2/UBIAD1/LRP12/RETSAT/RDH11/VKORC1/LRP1
skin	TP53 REGULATES METABOLIC GENES	1.68423	0.000506814	COX5B/NDUFA4/COX5A/TXN/LAMTOR2/COX8A/PRDX5/COX6A1/PRDX1/LAMTOR1/COX20/COX6B1/RRAGD/YWHAH/LAMTOR4/AGO1/RHEB/COX6C/COX14/YWHAQ/COX7B/AGO3/COX7A2L/SURF1/GSR/G6PD/TACO1/COX4I1/TIGAR/YWHAG/LRPPRC/AKT1
skin	SWITCHING OF ORIGINS TO A POST REPLICATIVE STATE	1.68146	0.000631171	PSMA7/ANAPC11/ANAPC15/PSMA5/PSMB6/PSMD8/PSMD4/PSMB1/PSMD6/PSMD7/SEM1/RBX1/PSMD3/PSMD13/PSMD14/PSMC3/SKP1/PSMB5/PSMB2/PSMA2/PSMC5/ANAPC5/CDC26/PSMB4/PSMA1/PSMA6/PSME2/PSMD2/PSMD12/PSMA4/PSMB3/PSMA3/PSMD10/PSMB8/ANAPC10/PSMB7/PSMC4/UBA52/PSMC1/ORC3/MCM5/PSME3/UBE2S/PSMC2/MCM6/PSMB10
skin	DEGRADATION OF BETA CATENIN BY THE DESTRUCTION COMPLEX	1.67819	0.00147227	PSMA7/PSMA5/PSMB6/PSMD8/PSMD4/PSMB1/PSMD6/PSMD7/SEM1/RBX1/PSMD3/MYC/PSMD13/PSMD14/PSMC3/SKP1/PSMB5/TLE1/PSMB2/PSMA2/PSMC5/PSMB4/PSMA1/TLE3/PPP2R1A/PSMA6/PSME2/PSMD2/PSMD12/PSMA4/PSMB3/PSMA3/PSMD10/PSMB8/PPP2CB/PSMB7/PSMC4/TCF7/UBA52/PSMC1/PSME3/AXIN1/PPP2R5C
skin	MATURATION OF SARS COV 2 SPIKE PROTEIN	1.67665	0.0152455	DAD1/DDOST/STT3A/RPN2/EDEM2/MGAT1/CANX/GANAB/RPN1/MGAT4A/MGAT4B
skin	CARBOXYTERMINAL POST TRANSLATIONAL MODIFICATIONS OF TUBULIN	1.67046	0.0284604	TUBA1C/TPGS2/TUBB6/TTL/TPGS1/VASH1/SVBP/TUBB4B/TUBA1A
skin	COLLAGEN DEGRADATION	1.6678	0.0175777	CTSD/CTSK/COL6A2/COL6A1/MMP19/MMP9/CTSB/MMP7/ADAM10/CTSL/MMP2/MMP14/ADAM9/COL3A1/ADAM17/COL8A2/COL1A1
skin	APC C MEDIATED DEGRADATION OF CELL CYCLE PROTEINS	1.66642	0.00108983	PSMA7/ANAPC11/ANAPC15/PSMA5/PSMB6/PSMD8/PSMD4/PSMB1/PSMD6/PSMD7/SEM1/PSMD3/PSMD13/PSMD14/PSMC3/SKP1/PSMB5/PSMB2/PSMA2/PSMC5/ANAPC5/CDC26/BUB3/PSMB4/PTTG1/PSMA1/CDC20/PSMA6/PSME2/PSMD2/PSMD12/PSMA4/PSMB3/PSMA3/PSMD10/PSMB8/ANAPC10/PSMB7/PSMC4/UBA52/PSMC1
skin	HEDGEHOG ON STATE	1.66593	0.00131021	PSMA7/PSMA5/PSMB6/PSMD8/PSMD4/PSMB1/PSMD6/PSMD7/SEM1/RBX1/PSMD3/PSMD13/PSMD14/PSMC3/PSMB5/PSMB2/PSMA2/PSMC5/PSMB4/PSMA1/PSMA6/PSME2/PSMD2/PSMD12/PSMA4/PSMB3/PSMA3/PSMD10/PSMB8/GPR161/PSMB7/PSMC4/UBA52/SPOPL/PSMC1/SMURF1/PSME3/ARRB2/PSMC2
skin	DNA REPLICATION PRE INITIATION	1.6572	0.00123663	PSMA7/PSMA5/PSMB6/PSMD8/PSMD4/PSMB1/PSMD6/PSMD7/SEM1/PSMD3/PSMD13/PSMD14/PSMC3/PSMB5/PSMB2/PSMA2/PSMC5/RPA3/PSMB4/PSMA1/DBF4/GMNN/PSMA6/PSME2/PSMD2/PSMD12/PSMA4/PSMB3/PSMA3/PSMD10/PSMB8/PSMB7/PSMC4/POLE3/UBA52/PSMC1/POLE4/ORC3/MCM5/PSME3/PSMC2/MCM6/PSMB10
skin	GLUTATHIONE CONJUGATION	1.65693	0.0303278	MGST3/GSTO1/GCLC/GSTP1/GGCT/GSTK1/CNDP2/MGST2/AKR1A1/MGST1
skin	SIGNALING BY NOTCH4	1.65555	0.00190368	PSMA7/PSMA5/PSMB6/PSMD8/PSMD4/PSMB1/PSMD6/PSEN2/PSENEN/PSMD7/SEM1/RBX1/APH1A/PSMD3/PSMD13/PSMD14/HEY1/PSMC3/NCSTN/SKP1/PSMB5/ADAM10/PSMB2/PSMA2/PSMC5/PSMB4/PSMA1/AKT1/PSMA6/PSME2/PSMD2/PSMD12/PSMA4/PSMB3/PSMA3/PSMD10/PSMB8/PSMB7/PSMC4/UBA52/PSMC1
skin	IRON UPTAKE AND TRANSPORT	1.65533	0.0107209	ATP6V1F/TCIRG1/TFRC/ATP6AP1/ATP6V1G1/STEAP3/ATP6V0C/ATP6V1E1/GLRX3/SKP1/ATP6V0E2/NEDD8/ATP6V1B2/ATP6V0B/FTH1/ATP6V0A1/ATP6V0E1/HMOX1/FTL/ATP6V0D2/ACO1/MCOLN1
skin	CYTOPROTECTION BY HMOX1	1.65495	0.000296321	HM13/PSMA7/COX5B/NDUFA4/COX5A/COX8A/PSMA5/PSMB6/PSMD8/COX6A1/PSMD4/CSNK2B/PSMB1/PSMD6/COX20/COX6B1/PSMD7/BLVRB/SEM1/RBX1/PSMD3/PSMD13/PSMD14/PSMC3/COX6C/COX14/SKP1/COX7B/PSMB5/PSMB2/COX7A2L/PSMA2/SURF1/PSMC5/PSMB4/HMOX1/TACO1/COX4I1/PSMA1/LRPPRC/PSMA6/HDAC3/PSME2/PSMD2/PSMD12/PSMA4/PSMB3/PSMA3/PSMD10/PSMB8/CHD9/FBXL17/ABCC1/PSMB7/PSMC4/UBA52/PSMC1/NCOA6/KEAP1/PSME3
skin	ABC TRANSPORTER DISORDERS	1.65135	0.00171745	PSMA7/PSMA5/PSMB6/PSMD8/PSMD4/PSMB1/PSMD6/PSMD7/SEM1/PSMD3/PSMD13/PSMD14/PSMC3/PSMB5/PSMB2/PSMA2/PSMC5/PSMB4/PSMA1/DERL1/PSMA6/PSME2/PSMD2/PSMD12/PSMA4/PSMB3/PSMA3/PSMD10/PSMB8/PSMB7/PSMC4/UBA52/PSMC1/SEL1L/PSME3/VCP
skin	UCH PROTEINASES	1.64567	0.00108983	PSMA7/UCHL3/PSMA5/PSMB6/PSMD8/PSMD4/SMAD7/PSMB1/PSMD6/PSMD7/SEM1/PSMD3/TFPT/PSMD13/PSMD14/PSMC3/NEDD8/PSMB5/PSMB2/PSMA2/PSMC5/PSMB4/PSMA1/ACTL6A/PSMA6/PSME2/MCRS1/ADRM1/PSMD2/PSMD12/PSMA4/PSMB3/PSMA3/PSMD10/PSMB8/ACTB/PSMB7/PSMC4/UBA52/PSMC1/INO80E/YY1/RUVBL1/PSME3/ASXL1/PSMC2/PSMB10/INO80B/PSME4/INO80C
skin	DOWNSTREAM SIGNALING EVENTS OF B CELL RECEPTOR BCR	1.64439	0.00277025	PSMA7/PSMA5/PSMB6/PSMD8/PSMD4/PSMB1/PSMD6/PSMD7/SEM1/PPIA/PSMD3/PSMD13/PSMD14/PSMC3/SKP1/PSMB5/PSMB2/PSMA2/PSMC5/RASGRP3/PSMB4/PSMA1/CALM1/FKBP1A/IKBKG/PSMA6/PSME2/PSMD2/PSMD12/PSMA4/PSMB3/PSMA3/KRAS/CHUK/PSMD10/PSMB8/REL/PSMB7/PSMC4/NFKBIB/UBA52/PSMC1/HRAS/NFKBIA/PSME3
skin	GLYCOSAMINOGLYCAN DEGRADATION	1.64227	0.0365057	GUSB/HEXB/GNS/GLB1/HEXA/HYAL2/SGSH/NAGLU
skin	REGULATION OF RUNX2 EXPRESSION AND ACTIVITY	1.64099	0.00411909	PSMA7/PSMA5/PSMB6/PSMD8/PSMD4/PSMB1/PSMD6/PSMD7/SEM1/STUB1/RBX1/PSMD3/PSMD13/PSMD14/PSMC3/SKP1/PSMB5/PSMB2/PSMA2/PSMC5/PSMB4/PSMA1/ESRRA/TWIST1/PSMA6/PSME2/PSMD2/PSMD12/PSMA4/PSMB3/PSMA3/PSMD10/PSMB8/PSMB7/PSMC4/UBA52/PSMC1/SMURF1/PSME3
skin	COOPERATION OF PREFOLDIN AND TRIC CCT IN ACTIN AND TUBULIN FOLDING	1.64026	0.0365137	CCT7/TUBA1C/TUBB6/CCT5/CCT4/PFDN6/TUBB4B/CCT6A/TUBA1A/PFDN2/CCT3/CCT2/ACTB/PFDN5/PFDN4/TCP1/TUBA1B/PFDN1/VBP1
skin	BILE ACID AND BILE SALT METABOLISM	1.63893	0.027577	CYP27A1/HSD3B7/ABCC3/HSD17B4/SCP2
skin	DISEASES OF CARBOHYDRATE METABOLISM	1.63841	0.0223532	GUSB/TALDO1/DCXR/GNS/GAA/GLB1/GYG1/G6PC3/SGSH/NAGLU/GYS1/GALNS/GBE1/UBA52
skin	REGULATION OF PTEN STABILITY AND ACTIVITY	1.63516	0.00458036	PSMA7/PSMA5/PSMB6/PSMD8/PSMD4/CSNK2B/PSMB1/PSMD6/PSMD7/SEM1/STUB1/PSMD3/PSMD13/PSMD14/PSMC3/PSMB5/PSMB2/PSMA2/PSMC5/PSMB4/PSMA1/XIAP/AKT1/PSMA6/PSME2/PSMD2/PSMD12/PSMA4/PSMB3/PSMA3/PSMD10/PSMB8/PSMB7/PSMC4/UBA52/PSMC1
skin	CROSS PRESENTATION OF SOLUBLE EXOGENOUS ANTIGENS ENDOSOMES	1.63181	0.00969292	PSMA7/PSMA5/PSMB6/PSMD8/PSMD4/PSMB1/PSMD6/PSMD7/SEM1/PSMD3/PSMD13/PSMD14/PSMC3/PSMB5/PSMB2/PSMA2/PSMC5/PSMB4/MRC2/PSMA1/PSMA6/PSME2/PSMD2/PSMD12/PSMA4/PSMB3/PSMA3/PSMD10/PSMB8/PSMB7/PSMC4/PSMC1
skin	SYNDECAN 1 PATHWAY	1.62963	0.0237613	COL6A2/COL6A1/PPIB/MMP9/MMP7/CCL5/BSG/MAPK3/SDCBP/COL3A1/HGF/COL8A2/COL1A1/HPSE
skin	MITOCHONDRIAL PROTEIN IMPORT	1.62576	0.00550304	TIMM8B/MTX1/VDAC1/CYC1/TIMM10/TOMM40/CS/NDUFB8/CHCHD2/SLC25A6/CHCHD10/CHCHD5/CMC2/COQ2/COA6/CHCHD3/TOMM5/TIMM44/IDH3G/DNAJC19/MTX2/HSPD1/TIMM22/TIMM17A/CHCHD7/PMPCA/TIMM17B/TOMM22/TOMM20/GFER/ACO2/SAMM50/COX17/PMPCB/TIMM8A/TOMM70
skin	CELL EXTRACELLULAR MATRIX INTERACTIONS	1.62516	0.0365137	LIMS1/FLNA/RSU1/PARVB/ACTN1/ACTG1/FERMT2/LIMS2/ITGB1/ACTB/ILK
skin	CELLULAR RESPONSE TO HYPOXIA	1.62452	0.00623335	PSMA7/PSMA5/PSMB6/PSMD8/PSMD4/PSMB1/PSMD6/ELOB/PSMD7/SEM1/RBX1/PSMD3/PSMD13/PSMD14/EPAS1/PSMC3/PSMB5/PSMB2/PSMA2/PSMC5/PSMB4/PSMA1/UBE2D2/EGLN3/ELOC/PSMA6/PSME2/PSMD2/PSMD12/PSMA4/PSMB3/PSMA3/HIGD1A/PSMD10/PSMB8/PSMB7/PSMC4/UBA52/PSMC1
skin	FORMATION OF TUBULIN FOLDING INTERMEDIATES BY CCT TRIC	1.62288	0.0376278	CCT7/TUBA1C/TUBB6/CCT5/CCT4/TUBB4B/CCT6A/TUBA1A/CCT3/CCT2/TCP1/TUBA1B
skin	SIGNALING BY HEDGEHOG	1.62274	0.000429411	PSMA7/P4HB/PSMA5/PSMB6/PSMD8/PSMD4/PSMB1/PSMD6/PSMD7/SEM1/TUBA1C/RBX1/PSMD3/TUBB6/PSMD13/PSMD14/PSMC3/SKP1/PSMB5/ADCY3/PSMB2/PSMA2/PSMC5/GNAS/PRKAR2A/PRKAR1B/PSMB4/PSMA1/TUBB4B/TUBA1A/IFT52/PSMA6/PSME2/PSMD2/PSMD12/PSMA4/PSMB3/PSMA3/PSMD10/PRKAR1A/PSMB8/GPR161/PSMB7/PSMC4/UBA52/SPOPL/PSMC1/SEL1L/SMURF1/ADAM17/PSME3/VCP/TUBA1B/ARRB2/PSMC2
skin	SYNTHESIS OF DNA	1.6221	0.00108983	PSMA7/ANAPC11/ANAPC15/PSMA5/PSMB6/PSMD8/PSMD4/PSMB1/PSMD6/PSMD7/SEM1/RBX1/PSMD3/PSMD13/PSMD14/POLD4/PSMC3/SKP1/PSMB5/PSMB2/PSMA2/PSMC5/ANAPC5/RPA3/CDC26/PSMB4/PSMA1/GINS3/PSMA6/PSME2/PSMD2/PSMD12/PSMA4/PSMB3/PSMA3/PSMD10/PSMB8/ANAPC10/PSMB7/PSMC4/POLE3/UBA52/PSMC1/POLD3/POLE4/ORC3/MCM5/POLD2/PSME3/UBE2S
skin	RUNX1 REGULATES TRANSCRIPTION OF GENES INVOLVED IN DIFFERENTIATION OF HSCS	1.61918	0.00300702	PSMA7/PSMA5/PSMB6/PSMD8/PSMD4/PSMB1/PSMD6/PSMD7/SEM1/PSMD3/PSMD13/PSMD14/PSMC3/PSMB5/PSMB2/PSMA2/PSMC5/PSMB4/PSMA1/SPI1/ABL1/PSMA6/PSME2/CCNH/PSMD2/PSMD12/PSMA4/PSMB3/PSMA3/PSMD10/PSMB8/PSMB7/PSMC4/UBA52/PSMC1
skin	ROS AND RNS PRODUCTION IN PHAGOCYTES	1.61619	0.0299154	ATP6V1F/TCIRG1/ATP6V1G1/ATP6V0C/ATP6V1E1/RAC2/ATP6V0E2/ATP6V1B2/ATP6V0B/ATP6V0A1/ATP6V0E1/NCF1/ATP6V0D2/CYBA/SLC11A1/ATP6V0D1/ATP6V1A/ATP6V0A2
skin	POST CHAPERONIN TUBULIN FOLDING PATHWAY	1.61318	0.0491079	TUBA1C/TUBB6/TBCB/ARL2/TBCA/TUBB4B/TUBA1A
skin	STABILIZATION OF P53	1.59962	0.0186537	PSMA7/PSMA5/PSMB6/PSMD8/PSMD4/PSMB1/PSMD6/PSMD7/SEM1/PSMD3/PSMD13/PSMD14/PSMC3/PSMB5/PSMB2/PSMA2/PSMC5/PSMB4/PSMA1/PSMA6/PSME2/PSMD2/PSMD12/PSMA4/PSMB3/PSMA3/PSMD10/PSMB8/PSMB7/PSMC4/UBA52/PSMC1/PSME3/MDM2/PSMC2
skin	ECM RECEPTOR INTERACTION	1.59878	0.0131679	SPP1/FN1/SDC2/COL6A2/COL6A1/SDC4/CD36/ITGB5/ITGA3
skin	DNA REPLICATION	1.59624	0.000769225	PSMA7/ANAPC11/ANAPC15/PSMA5/PSMB6/PSMD8/PSMD4/PSMB1/PSMD6/PSMD7/SEM1/RBX1/PSMD3/PSMD13/PSMD14/POLD4/PSMC3/SKP1/PSMB5/PSMB2/PSMA2/PSMC5/ANAPC5/RPA3/CDC26/PSMB4/PSMA1/DBF4/GMNN/GINS3/PSMA6/PSME2/PSMD2/PSMD12/PSMA4/PSMB3/PSMA3/PSMD10/PSMB8/ANAPC10/PSMB7/PSMC4/POLE3/UBA52/PSMC1/POLD3/POLE4/ORC3/MCM5/POLD2/PSME3/UBE2S
skin	AMINO SUGAR AND NUCLEOTIDE SUGAR METABOLISM	1.58282	0.0365137	HEXB/NPL/CHIT1/CYB5R3/HEXA/UGP2/UGDH/GALK1/HK1/PGM3/GFPT1/AMDHD2/NAGK/HK2/NANS/CYB5R1/GPI/CMAS/PGM2/GALE/GALK2/HK3
skin	CYCLIN A CDK2 ASSOCIATED EVENTS AT S PHASE ENTRY	1.5812	0.00513364	PSMA7/PSMA5/PSMB6/PSMD8/PSMD4/PSMB1/PSMD6/PSMD7/SEM1/PSMD3/MYC/PSMD13/PSMD14/PSMC3/SKP1/PSMB5/PSMB2/PSMA2/PSMC5/PSMB4/RBBP4/PSMA1/CKS1B/CDK4/AKT1/PSMA6/PSME2/CCNH/PSMD2/PSMD12/CDC25B/PSMA4/PSMB3/PSMA3/PSMD10/PSMB8/PSMB7/PSMC4/UBA52/PSMC1/LIN52
skin	G1 S DNA DAMAGE CHECKPOINTS	1.57519	0.00989316	PSMA7/PSMA5/PSMB6/PSMD8/PSMD4/PSMB1/PSMD6/ZNF385A/PSMD7/SEM1/PSMD3/PSMD13/PSMD14/PSMC3/PSMB5/PSMB2/PSMA2/PSMC5/PSMB4/PSMA1/CHEK1/PSMA6/PSME2/PSMD2/PSMD12/PSMA4/PSMB3/PSMA3/PSMD10/PSMB8/PSMB7/PSMC4/UBA52/PSMC1/PSME3/MDM2/PSMC2
skin	MRNA SPLICING MINOR PATHWAY	1.57503	0.0303278	ZCRB1/POLR2L/POLR2E/SF3B5/POLR2F/YBX1/SNRNP25/SNRPF/SNRPB/SNRPE/SNRPG/TXNL4A/SNRPD2/GTF2F2/SNRPD3/POLR2J/POLR2I/SNRPD1/NCBP2/PRPF6/ZMAT5/POLR2D/EFTUD2/DDX23/SRSF7/SNRNP200/POLR2K/POLR2G/SNRNP40
skin	VISUAL PHOTOTRANSDUCTION	1.57301	0.0295466	LPL/APOE/SDC2/GPC4/DHRS9/SDC4/APOC2/METAP2/GNB1/LRP12/CALM1/RETSAT/RDH11/LRP1/DHRS3/CAMKMT/PDE6G/AGRN/NMT1/FNTA/FNTB/AKR1C1/GRK4/AKR1C3
skin	NEDDYLATION	1.56442	0.000129357	PSMA7/UCHL3/FBXW5/PSMA5/PSMB6/PSMD8/PSMD4/PSMB1/PSMD6/COMMD9/ELOB/COMMD7/COMMD1/PSMD7/SEM1/RBX1/PSMD3/BTBD6/BTBD1/PSMD13/PSMD14/EPAS1/PSMC3/RNF7/COPS8/SKP1/GPS1/NEDD8/PSMB5/PSMB2/PSMA2/PSMC5/FEM1B/WSB2/UBE2F/DCAF11/PSMB4/DDB1/COPS6/PSMA1/FBXO22/DDA1/UBE2D2/COPS4/NUB1/DCAF13/ELOC/FBXL18/DCAF7/COPS5/WDTC1/CCDC22/COMMD3/COPS2/DCAF6/PSMA6/COMMD8/FBXO7/PSME2/COMMD10/NAE1/PSMD2/PSMD12/PSMA4/PSMB3/PSMA3…
skin	TNFR2 NON CANONICAL NF KB PATHWAY	1.5633	0.00726641	PSMA7/PSMA5/PSMB6/PSMD8/PSMD4/TNFRSF11A/PSMB1/PSMD6/PSMD7/SEM1/PSMD3/PSMD13/PSMD14/TNFSF14/PSMC3/SKP1/TNFSF13B/PSMB5/PSMB2/PSMA2/PSMC5/TNFSF9/PSMB4/PSMA1/TNFSF12/LTBR/TNFRSF18/PSMA6/PSME2/TNFRSF12A/PSMD2/PSMD12/PSMA4/TRAF3/PSMB3/PSMA3/CHUK/PSMD10/PSMB8/PSMB7/PSMC4/CD40/UBA52/PSMC1
skin	BETA CATENIN INDEPENDENT WNT SIGNALING	1.5629	0.00177709	PSMA7/AP2S1/PSMA5/PSMB6/GNG5/PSMD8/PSMD4/CLTB/PSMB1/PSMD6/PSMD7/SEM1/AGO1/PSMD3/MYC/AP2M1/PSMD13/PSMD14/PSMC3/PFN1/GNB4/RAC2/PSMB5/GNB1/PSMB2/AGO3/PSMA2/PSMC5/RHOA/CLTA/PSMB4/AP2B1/PSMA1/CALM1/GNG11/GNB2/PSMA6/NLK/PSME2/PSMD2/PSMD12/PSMA4/PSMB3/PSMA3/KRAS/PSMD10/PSMB8/PDE6G/PSMB7/PSMC4/TCF7/UBA52/PSMC1/SMURF1/RYK/PSME3/ITPR1/ARRB2/PSMC2/GNG10/PSMB10/GNGT2/DVL1
skin	ECM PROTEOGLYCANS	1.55761	0.0413952	FN1/SPARC/COL6A2/COL6A1/ITGAX/ITGB5/SERPINE1
skin	G2 M CHECKPOINTS	1.55726	0.00168698	PSMA7/PSMA5/PSMB6/PSMD8/PSMD4/PSMB1/PSMD6/PSMD7/YWHAH/SEM1/PSMD3/BABAM1/PSMD13/PSMD14/PSMC3/YWHAQ/PSMB5/UBE2N/PSMB2/PSMA2/PSMC5/RPA3/PSMB4/NBN/UBE2V2/RNF8/PSMA1/DBF4/UIMC1/CHEK1/RAD9A/YWHAG/HUS1/PSMA6/PSME2/SUMO1/KAT5/PSMD2/PSMD12/PSMA4/CLSPN/PSMB3/PSMA3/PSMD10/PSMB8/RAD1/PSMB7/PSMC4/UBA52/PSMC1/BRCC3/ORC3/MCM5
skin	MAPK6 MAPK4 SIGNALING	1.54938	0.0226399	PSMA7/PSMA5/PSMB6/PSMD8/PSMD4/PSMB1/PSMD6/PSMD7/SEM1/AGO1/PSMD3/MYC/PSMD13/PSMD14/HSPB1/PSMC3/PSMB5/PSMB2/AGO3/PSMA2/PSMC5/PSMB4/PSMA1/MMP2/CDC42/PSMA6/PSME2/PSMD2/PSMD12/PSMA4/PSMB3/PSMA3/PSMD10/PSMB8/PSMB7/PSMC4/UBA52/PSMC1
skin	REGULATION OF EXPRESSION OF SLITS AND ROBOS	1.54754	0.000539197	PSMA7/RPS27L/PSMA5/PSMB6/PSMD8/PSMD4/PSMB1/PSMD6/ELOB/UPF3A/PSMD7/SEM1/RPSA/RBX1/PSMD3/RPS26/PSMD13/PSMD14/PSMC3/RPS28/RPL41/PSMB5/PSMB2/PSMA2/PSMC5/RPL22L1/RPLP0/PSMB4/GSPT1/RPL7/RPL3/PSMA1/RPS5/RPL9/EIF4G1/RBM8A/RPL39/NCBP2/ELOC/RPS2/RPS4Y1/RPL21/RPL39L/RPL36A/RPL10/PSMA6/PSME2/RPL18A/PSMD2/RPL8/PSMD12/PSMA4/RPL10A/PSMB3/PSMA3/RPL13A/PSMD10/RPL26L1/PSMB8/RPS7/PSMB7/PSMC4/UBA52/PSMC1/FAU/RPL7A/P…
skin	TRANS GOLGI NETWORK VESICLE BUDDING	1.54374	0.0217928	TFRC/CHMP2A/AP3S1/CTSZ/DNASE2/CLTB/SORT1/RAB5C/GNS/SNX5/VAMP8/BLOC1S1/FTH1/CLTA/STX4/FTL/AP1S1/APP/AP3B1/ARF1/ACBD3/CLINT1/TGOLN2
skin	RNA POLYMERASE I TRANSCRIPTION	1.54052	0.0413952	POLR2L/POLR2E/POLR2F/GTF2H5/MBD2/MAPK3/POLR1D/CAVIN1/TAF1D/RBBP4/GTF2H3/MBD3/GATAD2A/CCNH/TAF1A/TTF1/POLR2K/GTF2H1/HDAC2
skin	HOST INTERACTIONS OF HIV FACTORS	1.53908	0.00261242	PSMA7/AP2S1/PSMA5/PSMB6/PSMD8/PSMD4/HMGA1/PSMB1/PSMD6/ELOB/PSMD7/SEM1/SLC25A5/PPIA/BANF1/RBX1/PSMD3/AP2M1/PSMD13/PSMD14/PSMC3/SKP1/PSMB5/PSMB2/PSMA2/SLC25A6/PSMC5/NPM1/RAN/PSMB4/AP2B1/PSMA1/AP1S1/NUP88/HLA-A/ARF1/RANBP1/ELOC/PSMA6/PSME2/PSMD2/PSMD12/NUP188/PSMA4/AP1S3/PSMB3/SEH1L/PSMA3/PSMD10/PSMB8/PSMB7/PSMC4/UBA52/PSMC1
skin	SRP DEPENDENT COTRANSLATIONAL PROTEIN TARGETING TO MEMBRANE	1.53311	0.00720814	RPS27L/SSR3/SSR4/SEC11C/SEC61G/SEC61B/RPSA/RPS26/DDOST/SPCS2/RPS28/RPL41/SRP14/RPN2/SSR2/RPL22L1/RPLP0/SRP72/RPN1/RPL7/RPL3/SPCS1/RPS5/RPL9/RPL39/RPS2/RPS4Y1/RPL21/RPL39L/RPL36A/RPL10/TRAM1/RPL18A/RPL8/SRPRA/RPL10A/RPL13A/RPL26L1/RPS7/SRP9/UBA52/FAU/RPL7A/SPCS3/RPL28/RPL14/RPL6/RPS27/SEC11A/RPS12/RPLP1/RPS9/RPS3A/SEC61A1/RPS3/RPL23A
skin	ABC FAMILY PROTEINS MEDIATED TRANSPORT	1.51608	0.016816	PSMA7/ABCC3/PSMA5/PSMB6/PSMD8/PSMD4/PSMB1/PSMD6/PSMD7/SEM1/PSMD3/PSMD13/PSMD14/PSMC3/PSMB5/PSMB2/PSMA2/PSMC5/PSMB4/PSMA1/DERL1/PSMA6/PSME2/PSMD2/PSMD12/PSMA4/PSMB3/PSMA3/PSMD10/PSMB8/ABCC1/PSMB7/PSMC4/ABCB8/UBA52/PSMC1/SEL1L/ABCB7/PSME3/VCP/ABCC5/ABCB10/PSMC2/PEX19/PSMB10
skin	FCERI MEDIATED NF KB ACTIVATION	1.51057	0.0152455	PSMA7/PSMA5/PSMB6/PSMD8/PSMD4/PSMB1/PSMD6/PSMD7/SEM1/PSMD3/PSMD13/PSMD14/PSMC3/SKP1/PSMB5/UBE2N/PSMB2/PSMA2/PSMC5/PSMB4/PSMA1/UBE2D2/IKBKG/PSMA6/PSME2/PSMD2/PSMD12/PSMA4/PSMB3/PSMA3/CHUK/PSMD10/PSMB8/PDPK1/PSMB7/PSMC4/UBA52/PSMC1/CDC34/TAB1/NFKBIA/PSME3
skin	SENSORY PERCEPTION	1.50249	0.0175809	LPL/APOE/SDC2/GSN/TWF2/GPC4/DHRS9/SDC4/MPP1/SPTAN1/KCNMA1/ACTG1/APOC2/METAP2/ADCY3/GNB1/MSN/CDH23/LRP12/CALM1/RETSAT/CAPZA1/RDH11/SPTBN1/CAPZB/LRP1/DHRS3/CAMKMT/ACTB/PDE6G/RDX/MYO1C/AGRN/NMT1/FNTA/CAPZA2/MYH9/FNTB/AKR1C1/EPS8/GRK4/AKR1C3
skin	NEUTROPHIL DEGRANULATION	1.50111	5.26242e-07	CSTB/FABP5/CHI3L1/LGALS3/CTSD/GUSB/GSN/TCIRG1/GM2A/ANXA2/HEXB/MIF/PKM/CD68/KCNAB2/S100A11/CD36/ATP6AP2/NDUFC2/ALDH3B1/CTSH/ITGB2/MMP9/ITGAX/LAMTOR2/CYSTM1/CHIT1/CTSB/PSMA5/TIMP2/BRI3/LAMP1/LTA4H/VAT1/SPTAN1/PGAM1/PTGES2/ASAH1/OLR1/CTSZ/CSNK2B/LAMTOR1/CYB5R3/CD63/PSMB1/PSMD6/COMMD9/CYFIP1/ATP6V0C/PDXK/PRCP/PRDX4/GSTP1/ANPEP/PSMD7/RAB5C/LYZ/APRT/PPIA/TUBB/DPP7/TRAPPC1/GNS/GRN/CTSA/PSMD3/GAA/DDOST/S…
skin	RESPONSE TO ELEVATED PLATELET CYTOSOLIC CA2	1.48847	0.00840102	FN1/CD9/SPARC/TIMP3/A2M/SCCPDH/CD36/ECM1/LHFPL2/FLNA/CD109/CALU/SERPINE1/WDR1/MANF/ACTN1/CD63/VEGFB/PPIA/ANXA5/PFN1/CFL1/TAGLN2/LAMP2/MAGED2/FERMT3/STX4/VTI1B/OLA1/TEX264/CALM1/MMRN1/APP/ALDOA
skin	MITOTIC G2 G2 M PHASES	1.4844	0.00244005	PHLDA1/PSMA7/PSMA5/PSMB6/PSMD8/PSMD4/MZT2B/SSNA1/PSMB1/PSMD6/PSMD7/SEM1/TUBB/TUBA1C/RBX1/PSMD3/TUBB6/PSMD13/PSMD14/CENPF/PSMC3/MZT1/SKP1/HAUS2/PSMB5/PSMB2/PSMA2/PSMC5/DYNC1I2/LCMT1/PSMB4/RBBP4/PSMA1/TUBB4B/HAUS6/MZT2A/TUBA1A/YWHAG/FBXL18/PPP2R1A/DCTN3/PSMA6/PCM1/PSME2/CCNH/TUBG1/PSMD2/PSMD12/CDC25B/PSMA4/CLASP1/PSMB3/CNTRL/PSMA3/PSMD10/DCTN2/PSMB8/PPP2CB/CDK11A/HMMR/PSMB7/PSMC4/OPTN/UBA52/CDK11B/…
skin	TRANSPORT OF SMALL MOLECULES	1.48112	1.08846e-06	LPL/APOC1/LIPA/APOE/A2M/ATP6V1F/SLC16A3/TCIRG1/NCEH1/PSMA7/AP2S1/TFRC/TRPV2/ATP6AP1/SLC1A3/P4HB/NR1H3/VDAC1/ABCC3/PSMA5/PSMB6/ATP6V1G1/GNG5/PSMD8/ATP2B4/STEAP3/PSMD4/APOBR/SLC29A3/SLC39A8/PSMB1/PSMD6/PDZD11/ATP6V0C/ATP6V1E1/PSMD7/SMDT1/SEM1/APOC2/SLC25A5/ASPH/CLCN7/SLC8B1/MCUB/ANKH/PSMD3/GLRX3/SLC26A11/AP2M1/PSMD13/PSMD14/PSMC3/GNB4/SLC6A6/SLC15A3/SKP1/VDAC2/SLC44A1/AQP9/ATP6V0E2/NEDD8/SLC31A1/PS…
skin	REGULATION OF MRNA STABILITY BY PROTEINS THAT BIND AU RICH ELEMENTS	1.47886	0.0353864	PSMA7/PSMA5/PSMB6/PSMD8/PSMD4/PSMB1/PSMD6/PSMD7/SEM1/PSMD3/PSMD13/PSMD14/HSPB1/PSMC3/KHSRP/PSMB5/PSMB2/PSMA2/PSMC5/PSMB4/ELAVL1/PSMA1/SET/EIF4G1/AKT1/PSMA6/PSME2/PSMD2/PSMD12/EXOSC7/PSMA4/PSMB3/PSMA3/PSMD10/PSMB8/ANP32A/PSMB7/PSMC4/UBA52/PSMC1/EXOSC6/PSME3
skin	PROTEIN LOCALIZATION	1.47824	0.00851825	TIMM8B/MTX1/VDAC1/FIS1/CYC1/SEC61G/TIMM10/HSD17B4/SEC61B/TOMM40/ECI2/CS/SCP2/NDUFB8/CHCHD2/GSTK1/CYB5A/ECH1/SLC25A6/CHCHD10/CHCHD5/CMC2/COQ2/COA6/HMGCL/HMOX1/IDH1/PEX10/VAPA/CHCHD3/TOMM5/UBE2D2/APP/TIMM44/IDH3G/DNAJC19/ACOT2/PEX16/MTX2/GDAP1/HSPD1/TIMM22/TIMM17A/ACAA1/CHCHD7/PMPCA/TIMM17B/TOMM22/UBA52/CAMLG/TOMM20/GFER/PEX1/ACO2/BAG6/IDE/SAMM50/PEX19/UBL4A/COX17/TYSND1/PMPCB/ACBD5/TIMM8A/TOMM70/P…
skin	CELLULAR RESPONSE TO STARVATION	1.47712	0.00779709	ATP6V1F/TCIRG1/RPS27L/LAMTOR2/ATP6V1G1/LAMTOR1/ATP6V0C/ATP6V1E1/RRAGD/LAMTOR4/RPSA/RHEB/RPS26/RPS28/ATP6V0E2/RPL41/ATP6V1B2/ATP6V0B/RPL22L1/RPLP0/ATP6V0E1/RPL7/RPL3/ATP6V0D2/RPS5/RPL9/CEBPB/RPL39/RPS2/NPRL3/RPS4Y1/RPL21/RPL39L/RPL36A/RPL10/RPL18A/RPL8/FNIP2/RPL10A/SEH1L/RPL13A/RPL26L1/RPS7/ATP6V0D1/UBA52/ATP6V1A/FAU/MLST8/RPL7A/RPL28/RPL14/RPL6/RPS27/ATP6V1C1/IMPACT/RPS12/DEPDC5/SH3BP4/RPLP1/RPS9…
skin	INTERLEUKIN 1 SIGNALING	1.47048	0.0300226	PSMA7/IL1RN/PSMA5/PSMB6/PSMD8/PSMD4/PSMB1/PSMD6/PSMD7/SEM1/RBX1/PSMD3/PSMD13/PSMD14/PSMC3/SKP1/PSMB5/UBE2N/PSMB2/PSMA2/PSMC5/IRAK1/RIPK2/PSMB4/PSMA1/TNIP2/APP/NKIRAS2/IKBKG/PSMA6/PSME2/TOLLIP/PSMD2/PSMD12/PSMA4/PSMB3/PSMA3/CHUK/PSMD10/PSMB8/PSMB7/PSMC4/NFKBIB/S100B/UBA52/PSMC1/TAB1/NFKBIA/PSME3
skin	PTEN REGULATION	1.46816	0.00989316	PSMA7/LAMTOR2/PSMA5/PSMB6/PSMD8/PSMD4/CSNK2B/LAMTOR1/PSMB1/PSMD6/RRAGD/PSMD7/SEM1/LAMTOR4/STUB1/AGO1/RHEB/PSMD3/PSMD13/PSMD14/PSMC3/PSMB5/PSMB2/AGO3/PSMA2/PSMC5/MAPK3/MAF1/PSMB4/RBBP4/PSMA1/PPARG/XIAP/MBD3/GATAD2A/AKT1/PSMA6/HDAC3/PSME2/PSMD2/PSMD12/PSMA4/PSMB3/PSMA3/PSMD10/PSMB8/PSMB7/PSMC4/UBA52/PSMC1
skin	METABOLISM OF AMINO ACIDS AND DERIVATIVES	1.46259	0.000239063	PSMA7/RPS27L/SDS/SQOR/SRM/ECHS1/PSMA5/PSMB6/PSMD8/PSMD4/NDUFAB1/PAPSS1/GRHPR/PSMB1/PSMD6/PSMD7/SEM1/PCBD1/RPSA/HIBADH/PSMD3/GLUL/RPS26/PSMD13/ADI1/PSMD14/NMRAL1/PSMC3/TXN2/CKB/RPS28/IL4I1/SLC44A1/RPL41/PSMB5/NQO1/PDHB/PSMB2/PSMA2/SMS/PSMC5/RPL22L1/SDSL/GSR/GCSH/RPLP0/PSMB4/BCAT1/BCKDK/RPL7/RPL3/PSMA1/SLC36A4/SEPHS2/GOT2/RPS5/RPL9/RPL39/DLD/PYCR2/RPS2/RPS4Y1/RPL21/RPL39L/RPL36A/RPL10/PSMA6/PSME2/A…
skin	METABOLISM OF VITAMINS AND COFACTORS	1.45109	0.00858551	LPL/APOE/ACP5/SDC2/GPC4/GSTO1/GCHFR/SDC4/CYB5R3/PDZD11/PDXK/APOC2/PC/CYB5A/MMAB/MTHFD1L/MTHFD2/SLC23A2/UBIAD1/COQ2/PTS/IDH1/LRP12/CALM1/BST1/PPCS/SLC52A2/RETSAT/VNN1/NMRK1/PANK3/FPGS/RDH11/AKT1/NADK/VKORC1/COQ5/MTHFR/LRP1/ACACB/SLC19A2/TCN2/SHMT2/FLAD1/SPR/PNPO/ABCC1/NAXE/AASDHPPT
skin	HIV INFECTION	1.44797	0.00198488	PSMA7/AP2S1/CHMP2A/PSMA5/POLR2L/PSMB6/PSMD8/POLR2E/PSMD4/HMGA1/PSMB1/PSMD6/POLR2F/ELOB/PSMD7/SEM1/SLC25A5/PPIA/BANF1/RBX1/PSMD3/AP2M1/PSMD13/PSMD14/GTF2H5/MVB12A/PSMC3/TAF10/CHMP4A/SKP1/GTF2A2/CXCR4/PSMB5/PSMB2/PSMA2/SLC25A6/PSMC5/NPM1/RAN/PSMB4/GTF2F2/TSG101/AP2B1/GTF2H3/CHMP5/PSMA1/CHMP3/AP1S1/SSRP1/NUP88/POLR2J/POLR2I/HLA-A/ARF1/NELFCD/VPS28/NCBP2/RANBP1/ELOC/PSMA6/TCEA1/PSME2/CCNH/CHMP4B/PSMD…
skin	TRANSCRIPTIONAL REGULATION BY RUNX2	1.44601	0.0353864	LGALS3/PSMA7/PSMA5/PSMB6/PSMD8/BAX/PSMD4/PSMB1/PSMD6/PSMD7/SEM1/STUB1/RBX1/PSMD3/PSMD13/PSMD14/HEY1/PSMC3/SKP1/PSMB5/PSMB2/PSMA2/PSMC5/MAPK3/PSMB4/PSMA1/ESRRA/TWIST1/ITGA5/CDK4/AKT1/ABL1/PSMA6/HDAC3/HDAC6/PSME2/PSMD2/PSMD12/PSMA4/PSMB3/PSMA3/PSMD10/PSMB8/PSMB7/PSMC4/UBA52/PSMC1/SMURF1/PSME3/COL1A1
skin	MHC CLASS II ANTIGEN PRESENTATION	1.44282	0.0303278	CTSD/CTSK/IFI30/AP2S1/CTSH/CTSB/TUBA1C/CTSA/TUBB6/AP2M1/CTSL/DYNC1I2/KIF22/CLTA/CANX/AP2B1/CTSO/TUBB4B/AP1S1/DYNC1LI1/TUBA1A/RILP/ARF1/SEC23A/CAPZA1/DCTN3/CENPE/CAPZB/AP1S3/CTSF/RACGAP1/DCTN2/HLA-DMA/ACTR10/DNM2/TUBA1B/SEC24B/CAPZA2/SEC24D/ACTR1A/KIF2A/AP1B1/DCTN6/OSBPL1A/AP1M1/DYNLL1/KIF3B/KIF5B/SAR1B/KLC4/ACTR1B
skin	EXTRACELLULAR MATRIX ORGANIZATION	1.43955	0.00755038	SPP1/FN1/CTSD/SPARC/A2M/SDC2/CTSK/COL6A2/COL6A1/SDC4/MMP19/P4HB/ITGB2/PPIB/MMP9/ITGAX/ITGB5/SERPINE1/CTSB/TIMP2/ACTN1/MMP7/ITGA3/CD151/NCSTN/ADAM10/CD47/CTSL/BSG/CAPN2/P3H1/CAPN1/ITGAE/LAMC1/MMP2/APP/CAPN15/CASP3/ITGA5/MMP14/LTBP1
skin	ANTIGEN PROCESSING CROSS PRESENTATION	1.43266	0.0364574	PSMA7/CD36/ITGB5/CALR/PSMA5/PSMB6/SEC61G/PSMD8/PSMD4/PSMB1/PSMD6/SEC61B/PSMD7/SEM1/PSMD3/VAMP8/PSMD13/PSMD14/PSMC3/LY96/PSMB5/PSMB2/PSMA2/CTSL/PSMC5/STX4/PSMB4/NCF1/MRC2/PSMA1/HLA-A/CYBA/PDIA3/IKBKG/PSMA6/PSME2/PSMD2/PSMD12/PSMA4/PSMB3/PSMA3/CHUK/PSMD10/PSMB8/S100A9/PSMB7/PSMC4/UBA52/PSMC1/PSME3/TAPBP/TAP2/PSMC2/TAP1/HMGB1/PSMB10
skin	SIGNALING BY NOTCH	1.42772	0.0131703	PSMA7/PSMA5/PSMB6/TMED2/PSMD8/PSMD4/PSMB1/PSMD6/PSEN2/PSENEN/PSMD7/SEM1/YBX1/AGO1/RBX1/APH1A/PSMD3/MYC/PSMD13/PSMD14/HEY1/PSMC3/NCSTN/SKP1/MDK/PSMB5/ADAM10/TLE1/PSMB2/AGO3/PSMA2/PSMC5/PSMB4/RAB6A/PSMA1/POFUT1/TLE3/RFNG/CDK8/AKT1/PSMA6/HDAC3/DTX4/HDAC6/PSME2/FCER2/PSMD2/PSMD12/PSMA4/HDAC10/PSMB3/PSMA3/PSMD10/PSMB8/PSMB7/PSMC4/UBA52/PSMC1/ST3GAL6/SEL1L/DTX2/ADAM17/PSME3
skin	CLEC7A DECTIN 1 SIGNALING	1.42405	0.0413952	PSMA7/PSMA5/PSMB6/PSMD8/PSMD4/PSMB1/PSMD6/PSMD7/SEM1/PSMD3/PSMD13/PSMD14/PSMC3/SKP1/PSMB5/UBE2N/PSMB2/PSMA2/PSMC5/CCL22/PSMB4/CARD9/PSMA1/CALM1/UBE2D2/IKBKG/PSMA6/PSME2/PSMD2/PSMD12/PSMA4/PSMB3/PSMA3/CHUK/PSMD10/PSMB8/PDPK1/PSMB7/PSMC4/UBA52/PSMC1/CDC34/TAB1/NFKBIA/PSME3/ITPR1/PSMC2/PSMB10/NFATC3/AHCYL1
skin	SIGNALING BY ROBO RECEPTORS	1.42016	0.00714713	PSMA7/RPS27L/EVL/PSMA5/PSMB6/PSMD8/PSMD4/PSMB1/PSMD6/ELOB/UPF3A/PSMD7/SEM1/RPSA/RBX1/PSMD3/RPS26/PSMD13/PSMD14/PSMC3/PFN1/RPS28/NCK1/RPL41/CXCR4/PSMB5/PSMB2/PSMA2/PSMC5/RHOA/RPL22L1/PRKAR2A/RPLP0/PSMB4/GSPT1/RPL7/RPL3/PSMA1/ABL2/RPS5/RPL9/EIF4G1/RBM8A/RPL39/NCBP2/ELOC/RPS2/RPS4Y1/RPL21/MYO9B/RPL39L/RPL36A/ABL1/RPL10/CDC42/PSMA6/PSME2/RPL18A/PSMD2/RPL8/PSMD12/PSMA4/CLASP1/RPL10A/PSMB3/PSMA3/RPL13A…
skin	ION CHANNEL TRANSPORT	1.41775	0.0433442	ATP6V1F/TCIRG1/TRPV2/ATP6AP1/ATP6V1G1/ATP2B4/PDZD11/ATP6V0C/ATP6V1E1/ASPH/CLCN7/ATP6V0E2/ATP6V1B2/ATP6V0B/ATP6V0A1/TTYH3/ATP6V0E1/TPCN2/MCOLN3/SGK3/CALM1/BEST1/ATP6V0D2/ATP13A1/SGK1/MCOLN1/OSTM1/SRI/ANO10/CAMK2D/MLKL/ATP6V0D1/UBA52/ATP6V1A
skin	S PHASE	1.4151	0.02208	PSMA7/ANAPC11/ANAPC15/PSMA5/PSMB6/PSMD8/PSMD4/PSMB1/PSMD6/PSMD7/SEM1/RBX1/PSMD3/MYC/PSMD13/PSMD14/POLD4/PSMC3/SKP1/PSMB5/PSMB2/PSMA2/PSMC5/ANAPC5/RPA3/CDC26/PSMB4/RBBP4/PSMA1/CKS1B/CDK4/GINS3/AKT1/PSMA6/PSME2/CCNH/SMC1A/PSMD2/PSMD12/CDC25B/PSMA4/PSMB3/PSMA3/PSMD10/PSMB8/ANAPC10/PSMB7/PSMC4/POLE3/UBA52/PSMC1/POLD3/POLE4/LIN52/ORC3/MCM5/POLD2/PSME3/UBE2S/PSMC2/E2F4/MCM6/PSMB10
skin	NERVOUS SYSTEM DEVELOPMENT	1.38338	0.000432061	TREM2/ALCAM/SDC2/COL6A2/COL6A1/PSMA7/AP2S1/RPS27L/EVL/MMP9/PSMA5/PSMB6/RHOC/PSMD8/RPS6KA1/PSMD4/SPTAN1/CSNK2B/CLTB/PSMB1/PSMD6/PSEN2/ELOB/UPF3A/PSENEN/MYL9/PSMD7/ACTG1/SEM1/TUBA1C/RPSA/RPS6KA2/ACTR3/EPHB2/RBX1/APH1A/SHTN1/PSMD3/MAPK13/TUBB6/RPS26/RASA1/AP2M1/PSMD13/PSMD14/ARPC3/PSMC3/PFN1/ARPC2/ARPC1B/NCSTN/CFL1/RPS28/NCK1/MYL6/RPL41/CXCR4/PSMB5/ADAM10/PDLIM7/NAB2/PSMB2/CD72/MSN/PSMA2/MYL12A/PSMC…
skin	SEPARATION OF SISTER CHROMATIDS	1.37777	0.0303278	PSMA7/ANAPC11/ANAPC15/PSMA5/PSMB6/PSMD8/PSMD4/PSMB1/PSMD6/PSMD7/SEM1/TUBA1C/PSMD3/TUBB6/PSMD13/PSMD14/CENPF/PSMC3/PSMB5/PSMB2/PSMA2/PSMC5/DYNC1I2/ANAPC5/CDC26/BUB3/PSMB4/CENPS/PTTG1/PSMA1/TUBB4B/DYNC1LI1/TUBA1A/PPP2R1A/MAD1L1/CDC20/PSMA6/CENPE/ZWINT/PPP1CC/PSME2/SMC1A/PSMD2/PSMD12/PSMA4/CLASP1/PSMB3/SEH1L/PSMA3/PSMD10/PSMB8/PPP2CB/ANAPC10/NUDC/PSMB7/PSMC4/UBA52/PSMC1/SKA2/PSME3/UBE2S/PPP2R5C/TUBA…
skin	UB SPECIFIC PROCESSING PROTEASES	1.37371	0.0300226	PSMA7/VDAC1/PSMA5/PSMB6/PSMD8/PSMD4/SMAD7/FKBP8/PSMB1/PSMD6/PSMD7/SEM1/PSMD3/MYC/PSMD13/PSMD14/PSMC3/TAF10/VDAC2/BECN1/PSMB5/PSMB2/PSMA2/PSMC5/PSMB4/USP12/PSMA1/VDAC3/SNX3/CDC20/IKBKG/PSMA6/PSME2/ADRM1/PSMD2/PSMD12/PSMA4/CLSPN/USP11/PSMB3/PSMA3/PSMD10/PSMB8/PSMB7/PSMC4/UBA52/PSMC1/USP14/TOMM20/RUVBL1/KEAP1/USP5/TAB1/NFKBIA/PSME3/AXIN1/ARRB2/MDM2/PSMC2/IDE/RCE1/ATXN7/PSMB10/WDR48/SMAD1
skin	AUTOPHAGY	1.37157	0.049263	PLIN2/CHMP2A/LAMTOR2/VDAC1/VIM/CSNK2B/LAMTOR1/RRAGD/PARK7/TOMM40/TUBA1C/LAMTOR4/GABARAPL2/RHEB/TUBB6/EPAS1/MVB12A/CHMP4A/BECN1/LAMP2/WIPI1/WIPI2/UBE2N/DYNC1I2/TSG101/CHMP3/TUBB4B/TOMM5/DYNC1LI1/TUBA1A/VPS28/FUNDC1/PLIN3/HDAC6/CHMP4B/ATG12/EEF1A1/ATG101/CHMP2B/MTMR14/MAP1LC3B/GABARAPL1/TOMM22/MFN1/UBA52/PRKAG2/MFN2/TOMM20/MLST8/VCP/HSF1/TSC2/TUBA1B/ATG13/MTMR3
skin	APOPTOSIS	1.37025	0.0365137	GSN/BCAP31/PSMA7/PSMA5/PSMB6/VIM/PSMD8/BAX/PSMD4/SPTAN1/ARHGAP10/PSMB1/PSMD6/PSMD7/YWHAH/SEM1/PSMD3/PSMD13/PSMD14/PSMC3/LY96/YWHAQ/C1QBP/PSMB5/BAD/PSMB2/LMNA/PSMA2/PSMC5/MAPK3/PSMB4/DBNL/PSMA1/DAPK3/XIAP/CASP3/YWHAG/AKT1/PSMA6/MAGED1/PPP3CC/PSME2/STK24/PSMD2/PSMD12/BAK1/PSMA4/CLSPN/PSMB3/CASP6/DFFA/ACIN1/PSMA3/PSMD10/PSMB8/PSMB7/PSMC4/UBA52/PSMC1/CASP9/TNFRSF10B/PSME3/NMT1/PLEC/FNTA/PSMC2/FAS/UAC…
skin	MITOTIC METAPHASE AND ANAPHASE	1.35459	0.0333412	PSMA7/ANAPC11/CHMP2A/ANAPC15/PSMA5/PSMB6/PSMD8/PSMD4/PSMB1/PSMD6/PSMD7/SEM1/TUBA1C/BANF1/PSMD3/TUBB6/PSMD13/PSMD14/CENPF/PSMC3/CHMP4A/PSMB5/PSMB2/LMNA/PSMA2/PSMC5/DYNC1I2/RAN/ANAPC5/CDC26/BUB3/PSMB4/CENPS/PTTG1/PSMA1/CHMP3/TUBB4B/DYNC1LI1/IST1/TUBA1A/PPP2R1A/MAD1L1/CDC20/PSMA6/CENPE/ZWINT/PPP1CC/PSME2/CHMP4B/SUMO1/SMC1A/PSMD2/PSMD12/NUP188/PSMA4/CLASP1/CHMP2B/PSMB3/SEH1L/PSMA3/PSMD10/PSMB8/PPP2CB…
skin	ASPARAGINE N LINKED GLYCOSYLATION	1.29395	0.0403558	FUOM/SRD5A3/DAD1/NPL/CALR/TMED2/TMED3/SPTAN1/CTSZ/LMAN2/COPZ2/TUBA1C/TRAPPC1/CTSA/TUBB6/ALG5/TMED10/DDOST/NAPG/ALG3/GOLGA2/CNIH1/TMED9/TRAPPC6A/GLB1/COPE/AMFR/STT3A/KDELR2/TRAPPC2L/COPZ1/RPN2/TRAPPC5/EDEM2/DYNC1I2/MGAT1/COG4/CANX/GANAB/NUS1/RPN1/DPM2/RAB1A/TUBB4B/MPDU1/MGAT4A/DERL1/USO1/DYNC1LI1/DPM3/TUBA1A/KDELR1/ARF1/SEC23A/COPB1/MGAT4B/NEU3/RAD23B/PGM3/UBXN1/GFPT1/CAPZA1/DCTN3/SEC22C/SPTBN1/PD…
skin	PEPTIDE LIGAND BINDING RECEPTORS	-1.56203	0.0197115	NLN/CCR2/FPR2/CXCL3/CXCL2/FPR1/CXCL5/CXCL8/CX3CR1/CXCL12/CCL2/CCL13
skin	FCER1 PATHWAY	-1.659	0.0206768	SOS1/MS4A2/PLPP1/SPHK1/PTK2/PIK3R1/GAB2/HCLS1/IKBKB/SYK/PIK3CA/MAP2K1/CBL/FER/MAP3K1/GRB2/FOS/NFATC2/VAV1/LYN/LCP2/FCER1A/FCGR2B
skin	DELTA NP63 PATHWAY	-1.6902	0.0422402	CEBPD/AXL/ADA/RUNX1/POU2F2/ATM/IL1A/WWP1
skin	CONSTITUTIVE SIGNALING BY ABERRANT PI3K IN CANCER	-1.7266	0.0221315	KIT/PIK3CB/NRG1/PIK3R1/CD86/ESR1/GAB2/CD28/PIK3CA/FGFR1/PIK3AP1/GRB2/PDGFB/PIK3CD/VAV1/EREG/HBEGF
skin	NEUROACTIVE LIGAND RECEPTOR INTERACTION	-1.72671	0.00184711	ADORA2B/ADRB1/HRH2/SSTR2/PTGER3/ADRB2/PTGER2/VIPR1/HTR2B/FPR2/CYSLTR2/NR3C1/FPR1/P2RY6/LPAR6/HRH1/P2RY13/P2RY14
skin	FCERI MEDIATED CA 2 MOBILIZATION	-1.73029	0.0217928	SOS1/MS4A2/IGLC2/SYK/TEC/GRB2/NFATC2/VAV1/LYN/LCP2/ITPR2/FCER1A
skin	ERBB4 PATHWAY	-1.7794	0.0333412	PIK3CB/NRG1/NEDD4/PIK3R1/PIK3CA/GRB2/JAK2/PIK3CD/CBFA2T3/EREG/HBEGF/WWP1
skin	NOD LIKE RECEPTOR SIGNALING PATHWAY	-1.81159	0.0029645	CARD6/NLRP1/MAP3K7/MEFV/BIRC3/CXCL2/CXCL8/IL6/CASP1/NLRP3/IL1B/CCL8/CCL2/CCL13
skin	INTERFERON ALPHA BETA SIGNALING	-1.84305	0.00861988	TYK2/IRF1/MX1/IRF9/IRF2/IRF7/IRF4/XAF1/ISG20/ADAR/IFITM1/EGR1/IFITM3/IFITM2
skin	IL27 PATHWAY	-1.86339	0.0458701	STAT4/TYK2/IL6ST/JAK2/EBI3/IL12RB2/IL6/IL1B
skin	INTERLEUKIN 10 SIGNALING	-1.86537	0.0108055	TYK2/IL10/CCR2/TNFRSF1A/CXCL2/FPR1/TNFRSF1B/CXCL8/IL6/IL1R2/PTGS2/IL1B/IL1A/CCL2
skin	BIOCARTA TOB1 PATHWAY	-1.87602	0.0433442	SMAD4/CD3G/TGFBR3/CD28/SMAD3/TGFBR2/TGFBR1/IL2RA/TOB2
skin	CHEMOKINE RECEPTORS BIND CHEMOKINES	-1.88193	0.00989316	CCR2/CXCL3/CXCL2/CXCL5/CXCL8/CX3CR1/CXCL12/CCL2/CCL13
skin	NFAT TFPATHWAY	-1.89793	0.00537302	BATF3/IL2RA/FOS/NFATC2/IRF4/CXCL8/EGR1/PTGS2/MAF
skin	IL23 PATHWAY	-1.90752	0.00812315	IL18R1/CXCL1/PIK3R1/PIK3CA/STAT4/TYK2/JAK2/IL6/CD4/IL1B/CCL2
skin	ROLE OF LAT2 NTAL LAB ON CALCIUM MOBILIZATION	-1.91197	0.0312182	LAT2/IGLC3/SOS1/MS4A2/IGLC2/PIK3CB/PIK3R1/GAB2/SYK/PIK3CA/GRB2/LYN/FCER1A
skin	CD209 DC SIGN SIGNALING	-1.91803	0.0303278	RELB/ICAM3/ICAM2/EP300/LYN/CREBBP/CD209
skin	COMPLEMENT AND COAGULATION CASCADES	-1.92252	0.0091561	C2/PLAUR/PLAU/C1QC/CFH/C1S/C1QB/SERPINA1/CFD/CR1/CD55/C1QA/THBD/F13A1
skin	CLASS A 1 RHODOPSIN LIKE RECEPTORS	-1.92654	3.5789e-07	HTR2B/NLN/CCR2/FPR2/P2RY12/GPBAR1/FFAR2/CYSLTR2/CXCL3/CXCL2/FPR1/CMKLR1/CXCL5/GPR132/HCAR2/CXCL8/CX3CR1/P2RY6/LPAR6/HCAR3/HRH1/CXCL12/P2RY13/CCL2/P2RY14/CCL13
skin	IL12 STAT4 PATHWAY	-1.9586	0.00530837	CD3G/IL18R1/PIAS2/CD86/CD28/STAT4/IRF1/IL2RA/ETV5/FOS/CREBBP/CD4
skin	BIOCARTA NO2IL12 PATHWAY	-1.98448	0.0224921	CD2/CD247/CXCR3/IL12RB1/CD3G/STAT4/TYK2/JAK2/IL12RB2/CD4
skin	BIOCARTA NTHI PATHWAY	-1.98596	0.0139794	MAP2K6/IKBKB/SMAD3/TGFBR2/MAP3K7/TGFBR1/EP300/NR3C1/CREBBP/CXCL8/IL1B
skin	BIOCARTA CYTOKINE PATHWAY	-2.02176	0.0238824	IL10/IL16/CXCL8/IL6/IL1A
skin	COMPLEMENT CASCADE	-2.02806	0.00277025	IGLC3/C5/IGLC2/IGHG1/C2/C1QC/CFH/C1S/C1QB/CFD/CR1/CD55/C1QA/CFP/FCN1
skin	NUCLEOTIDE LIKE PURINERGIC RECEPTORS	-2.18357	0.00851825	P2RY12/P2RY6/LPAR6/P2RY13/P2RY14
skin	COMMON PATHWAY OF FIBRIN CLOT FORMATION	-2.20293	0.0119997	F5/THBD/F13A1
skin	CREATION OF C4 AND C2 ACTIVATORS	-2.32175	0.0029645	IGLC3/IGLC2/IGHG1/C1QC/C1S/C1QB/C1QA/FCN1
skin	INITIAL TRIGGERING OF COMPLEMENT	-2.32334	0.00139543	IGLC3/IGLC2/IGHG1/C2/C1QC/C1S/C1QB/CFD/C1QA/CFP/FCN1
endo	LYSOSOME	1.97199	7.88942e-08	LGMN/CTSL/ACP5/LIPA/ACP2/PLA2G15/FUCA1/NPC1/GM2A/HEXA/ATP6V0D2/GNPTAB/CTSK/CTSB/CTSC/DNASE2/GBA/CTSD/LAMP1/HEXB/CTSF/ATP6AP1/AP1B1/ATP6V0A1/SCARB2/NAGLU/SLC17A5/CLN5/NEU1/NPC2/SLC11A2/CD63/CTNS/CTSZ/ARSA/CTSA/GUSB/ATP6V0C/AP1S1/GNPTG/CD68/LAMP2/GALC/GLA/AP3M2/GGA2/MAN2B1/SUMF1/NAGPA/TPP1/SMPD1/LAPTM4A/ATP6V1H/CD164/GGA1/GAA/CLTC/GLB1/MCOLN1/M6PR/CTSH/ATP6V0A2/CLTA/GNS/ASAH1/AP3S1
endo	COLLAGEN DEGRADATION	1.94199	2.46398e-06	MMP9/MMP14/CTSL/ADAM9/CTSK/CTSB/MMP12/MMP2/CTSD/MMP19/COL8A2/COL6A1/COL1A1/COL3A1/MMP7/COL1A2/MMP1/COL6A2
endo	SYSTEMIC LUPUS ERYTHEMATOSUS	1.90394	5.53669e-05	C1QC/C1QB/C1QA/C3/C2/FCGR2B/HLA-DOA/FCGR3A/CD40/HLA-DQA1/FCGR1A/HLA-DRB5/HLA-DQB1/HLA-DMA/IL10/HLA-DRB1/HLA-DMB/CD28/FCGR2A/HLA-DPA1/CD80
endo	PLASMA LIPOPROTEIN ASSEMBLY REMODELING AND CLEARANCE	1.85531	0.000123739	APOE/APOC1/A2M/PLTP/LPL/LIPA/ABCA1/NR1H3/NPC1/ABCG1/AP2A2/NCEH1/APOC2/SCARB1/PRKACB/NPC2/SOAT1/P4HB
endo	SCAVENGING BY CLASS A RECEPTORS	1.85439	0.000494189	APOE/MSR1/COLEC12/MARCO/CALR/HSP90B1/COL1A1/COL3A1/COL1A2
endo	BIOCARTA CLASSIC PATHWAY	1.8427	0.000404041	C1QC/C1QB/C1QA/C3/C2
endo	CYSTEINE AND METHIONINE METABOLISM	1.83795	0.000767952	IL4I1/SDS/DNMT1/ENOPH1/SMS/DNMT3A/LDHA/AHCY/MTR/MTAP/APIP/GOT1/SRM
endo	BIOCARTA COMP PATHWAY	1.8206	0.000738724	C1QC/C1QB/C1QA/C3/C2
endo	COMPLEMENT AND COAGULATION CASCADES	1.81355	0.000199713	A2M/C1QC/C1QB/C1QA/C3/CD59/C2/PLAU/SERPING1/F13A1/C3AR1/PROS1/SERPINE1
endo	TRANSFERRIN ENDOCYTOSIS AND RECYCLING	1.78595	0.00281749	ATP6V0D2/TFRC/STEAP3/ATP6AP1/ATP6V0A1/ATP6V0C/ATP6V1C1/ATP6V1D/ATP6V0E2/ATP6V1F/ATP6V1H/MCOLN1/ATP6V1E1/ATP6V1A/ATP6V0A2
endo	AMINO SUGAR AND NUCLEOTIDE SUGAR METABOLISM	1.78407	0.000738724	CHIT1/NPL/GNPDA1/HEXA/AMDHD2/HEXB/GPI/CYB5R1/RENBP/MPI/HK2/GALE/UXS1/PGM3/GNPNAT1/UGP2/GALK2/PGM2/GMPPB/NANS/GFPT1/CYB5R3/UGDH/NANP
endo	PLASMA LIPOPROTEIN ASSEMBLY	1.76564	0.00712418	APOE/APOC1/A2M/ABCA1/APOC2/PRKACB/P4HB
endo	PLASMA LIPOPROTEIN REMODELING	1.76536	0.0046987	APOE/PLTP/LPL/ABCG1/APOC2/P4HB/LMF2/PCSK6
endo	COLLAGEN FORMATION	1.76054	0.000148202	MMP9/CTSL/P4HA1/DST/CTSB/ITGA6/COLGALT1/COL8A2/P3H2/PLOD3/P4HB/SERPINH1/COL6A1/COL1A1/COL3A1/MMP7/COL1A2/PLOD1/P4HA2/CD151/LOXL3/COL6A2/PCOLCE2
endo	BINDING AND UPTAKE OF LIGANDS BY SCAVENGER RECEPTORS	1.75963	0.00140832	APOE/MSR1/COLEC12/MARCO/STAB1/CD163/SPARC/SCARB1/CALR/HSP90B1/HYOU1/COL1A1/COL3A1/COL1A2
endo	METABOLISM OF FAT SOLUBLE VITAMINS	1.74418	0.00276304	APOE/LPL/SDC3/SDC2/LRP12/APOC2/VKORC1/AKR1C3/SDC4/RDH11/RBP1/BCO2/GPC4/VKORC1L1
endo	PLASMA LIPOPROTEIN CLEARANCE	1.72752	0.00665896	APOE/APOC1/LIPA/NR1H3/NPC1/AP2A2/NCEH1/SCARB1/NPC2/SOAT1
endo	TYROSINE METABOLISM	1.69828	0.0120605	IL4I1/MIF/FAH/ADH5/GOT1/BUD23/MAOA/TRMT11/COMT/HEMK1/GOT2/LCMT1/METTL6/METTL2B
endo	BIOSYNTHESIS OF THE N GLYCAN PRECURSOR DOLICHOL LILINKED OLIGOSACCHARIDE LLO AND TRANSFER TO A NASCENT PROTEIN	1.69599	0.000659682	NPL/ST6GAL1/AMDHD2/SLC17A5/NEU1/ST3GAL6/CTSA/FUOM/RENBP/SRD5A3/MPI/NUDT14/ALG2/DPM2/PGM3/DPAGT1/GNPNAT1/ALG5/ALG3/GLB1/MVD/RFT1/ALG8/DHDDS/ALG1/ALG14/GMPPB/NANS/GFPT1/ST3GAL1/NANP/ST6GALNAC4/DPM3/DOLK/CMAS/MPDU1/NUS1/ST8SIA4/ALG12/ST3GAL3/ST3GAL5/ALG9/NEU3
endo	AUTOIMMUNE THYROID DISEASE	1.69458	0.017744	HLA-DOA/CD40/HLA-DQA1/HLA-DRB5/HLA-DQB1/HLA-DMA/IL10/HLA-DRB1/HLA-DMB/CD28/HLA-DPA1/CD80/HLA-DPB1
endo	N GLYCAN BIOSYNTHESIS	1.69242	0.00673939	MGAT4A/MGAT5/ST6GAL1/MAN1A1/STT3A/RPN2/ALG2/DPM2/DPAGT1/GANAB/FUT8/DAD1/ALG5/MAN1C1/ALG3/MAN1B1/RFT1/ALG8/DDOST/ALG1/ALG14/B4GALT3/DPM3/MOGS/MGAT4B/B4GALT1/MAN2A1/B4GALT2/ALG12/RPN1
endo	ASSEMBLY OF COLLAGEN FIBRILS AND OTHER MULTIMERIC STRUCTURES	1.68717	0.00276304	MMP9/CTSL/DST/CTSB/ITGA6/COL8A2/COL6A1/COL1A1/COL3A1/MMP7/COL1A2/CD151/LOXL3/COL6A2
endo	SYNTHESIS OF SUBSTRATES IN N GLYCAN BIOSYTHESIS	1.67529	0.00451992	NPL/ST6GAL1/AMDHD2/SLC17A5/NEU1/ST3GAL6/CTSA/FUOM/RENBP/SRD5A3/MPI/NUDT14/DPM2/PGM3/GNPNAT1/ALG5/GLB1/MVD/DHDDS/GMPPB/NANS/GFPT1/ST3GAL1/NANP/ST6GALNAC4/DPM3/DOLK/CMAS/NUS1/ST8SIA4/ST3GAL3/ST3GAL5
endo	SYNDECAN INTERACTIONS	1.67505	0.0180539	FN1/ITGB5/SDC3/SDC2/ITGA6/ITGAV/PRKCA/SDC4/COL1A1/COL3A1/COL1A2/TRAPPC4/ITGB3
endo	ASTHMA	1.66816	0.021732	HLA-DOA/CD40/HLA-DQA1/HLA-DRB5/HLA-DQB1/HLA-DMA/IL10/HLA-DRB1/HLA-DMB/HLA-DPA1/HLA-DPB1
endo	MITOCHONDRIAL TRANSLATION	1.66753	0.000659682	MRPL17/MRPL40/MRPL1/TSFM/MRPS6/MRPL24/MRPS23/MRPL4/MRPS28/MRPS18B/MRPL39/MRPL9/MRPL19/MRPL58/MRPL35/MRPL37/MRPL15/MRPL12/MRPL49/MRPS16/MRPL13/MRPS30/MRPL22/MTFMT/MTIF2/MRPL50/MRPL34/GADD45GIP1/MRPS35/MRPS10/MRPS15/MRPL27/MRPL43/MRPL57/MRPS7/MRPL32/MRPS17/MRPL3/MRPL42/CHCHD1/MRPS31/GFM1/ERAL1/MRPL2/MRPS14/MRPS33/MRPS2/MRPL14/MRPS26/MRPS27/MRPL41/MRPS22/MRPS25/MRPS9/MRPL36/MRPL16/MRPS12/MRPL44/MRPL…
endo	DEGRADATION OF THE EXTRACELLULAR MATRIX	1.65991	0.000382557	A2M/SPP1/MMP9/FN1/MMP14/CTSL/ADAM9/HTRA1/CTSK/CTSB/MMP12/MMP2/CTSD/MMP19/COL8A2/TIMP2/COL6A1/COL1A1/COL3A1/MMP7/COL1A2/MMP1/COL6A2
endo	FRA PATHWAY	1.65756	0.0166049	MMP9/CCND1/PLAU/CCL2/NFATC2/MMP2/HMOX1/JUN/USF2/COL1A2/MMP1
endo	MATURATION OF SARS COV 2 SPIKE PROTEIN	1.65406	0.0187282	MGAT4A/MGAT5/ST6GAL1/STT3A/RPN2/EDEM2/GANAB/FUT8/DAD1/MAN1B1/CANX/DDOST/MAGT1/ST3GAL1/ST6GALNAC4/MOGS/MGAT4B/MAN2A1/ST3GAL3/RPN1
endo	REGULATION OF INSULIN LIKE GROWTH FACTOR IGF TRANSPORT AND UPTAKE BY INSULIN LIKE GROWTH FACTOR BINDING PROTEINS IGFBPS	1.65338	0.000738724	APOE/SPP1/C3/FN1/IGF1/GAS6/FAM20C/MGAT4A/FAM20A/CSF1/SDC2/CALU/MMP2/PDIA6/IGFBP4/P4HB/HSP90B1/FUCA2/RCN1/NUCB1
endo	INTESTINAL IMMUNE NETWORK FOR IGA PRODUCTION	1.65224	0.0179262	HLA-DOA/CD40/CXCL12/HLA-DQA1/HLA-DRB5/HLA-DQB1/HLA-DMA/IL10/HLA-DRB1/HLA-DMB/CD28/ICOSLG/PIGR/HLA-DPA1/TNFSF13/CD80/HLA-DPB1/ITGB7
endo	INTEGRIN5 PATHWAY	1.65134	0.0241947	FN1/ITGB5/PLAU/TGFBR1/ITGAV/VCAM1/ITGB7/ITGB8
endo	ALLOGRAFT REJECTION	1.65004	0.0300532	HLA-DOA/CD40/HLA-DQA1/HLA-DRB5/HLA-DQB1/HLA-DMA/IL10/HLA-DRB1/HLA-DMB/CD28/HLA-DPA1/CD80/HLA-DPB1
endo	INSULIN RECEPTOR RECYCLING	1.6466	0.0352774	ATP6V0D2/ATP6AP1/ATP6V0A1/ATP6V0C/ATP6V1C1/ATP6V1D/ATP6V0E2/ATP6V1F/ATP6V1H/ATP6V1E1/ATP6V1A/ATP6V0A2
endo	GLUCONEOGENESIS	1.64065	0.021732	FBP1/ENO2/GPI/SLC37A4/MDH1/PCK2/SLC37A2/G6PC3/GOT1/ALDOC/PC/ALDOA/GOT2/TPI1/SLC25A11/SLC25A13/SLC25A1
endo	GLYCOSPHINGOLIMETABOLISM	1.63998	0.0180539	UGCG/GM2A/HEXA/GBA/HEXB/NEU1/ARSA/CTSA/B3GALNT1/ESYT1/GALC/GLA/SUMF2/SUMF1/SMPD1/GLB1
endo	NFAT TFPATHWAY	1.63531	0.021732	MAF/IL2RA/NFATC2/EGR2/PPARG/EGR1/JUN/CDK4/CBLB
endo	ION CHANNEL TRANSPORT	1.63121	0.000344185	STOM/ATP1B1/ATP6V0D2/ASPH/TTYH3/WWP1/SGK1/ATP2C1/ATP8B4/ATP6AP1/ATP6V0A1/CLIC2/TRPM2/PDZD11/ATP6V0C/ATP6V1C1/NEDD4L/TPCN1/ATP2A2/ATP6V1D/TRPV2/ATP6V0E2/TRPM4/ATP6V1F/ATP6V1H/CLCN3/RYR1/ATP11C/ATP9B/MCOLN1/ATP6V1E1/MCOLN2/CLCN7/ATP13A2/ATP10D/ATP6V1A/ATP7A/ATP6V0A2/OSTM1/ANO6/MCOLN3
endo	VISUAL PHOTOTRANSDUCTION	1.62398	0.00856699	APOE/DHRS3/LPL/SDC3/SDC2/LRP12/APOC2/PRKCA/MYO7A/AKR1C3/SDC4/RDH11/RBP1/BCO2/GPC4/CYP4V2
endo	IRON UPTAKE AND TRANSPORT	1.62251	0.00843878	SLC40A1/ATP6V0D2/TFRC/STEAP3/ATP6AP1/ATP6V0A1/SLC46A1/SLC11A2/HMOX1/ATP6V0C/ATP6V1C1/ATP6V1D/ATP6V0E2/ACO1/ATP6V1F/ATP6V1H/CYBRD1/MCOLN1/ATP6V1E1/ABCG2/ATP6V1A/ATP6V0A2
endo	FGF PATHWAY	1.62026	0.0180539	SPP1/MMP9/PLAU/SDC2/SPRY2/CTNND1/JUN/PIK3R1/SSH1/CTTN/HGF
endo	PHENYLALANINE METABOLISM	1.616	0.0380583	IL4I1/MIF/GOT1/MAOA/PRDX6/GOT2
endo	VIBRIO CHOLERAE INFECTION	1.61421	0.0187282	ATP6V0D2/PRKACB/ADCY3/ATP6AP1/PDIA4/ATP6V0A1/PRKCA/ERO1A/ATP6V0C/ATP6V1C1/ATP6V1D/ATP6V0E2/ATP6V1F/ATP6V1H/KDELR2/GNAS/KDELR1/ATP6V1E1/ATP6V1A/ATP6V0A2
endo	NR1H2 AND NR1H3 MEDIATED SIGNALING	1.61379	0.0187282	APOE/APOC1/PLTP/SCD/ABCA1/NR1H3/ABCG1/ARL4C/APOC2/SREBF1/KDM3A/EEPD1
endo	ACTIVATION OF MATRIX METALLOPROTEINASES	1.60567	0.0425068	MMP9/MMP14/CTSK/MMP2/TIMP2/MMP7/MMP1
endo	SIALIC ACID METABOLISM	1.6006	0.0425068	NPL/ST6GAL1/SLC17A5/NEU1/ST3GAL6/CTSA/GLB1/NANS/ST3GAL1/NANP/ST6GALNAC4/CMAS/ST8SIA4/ST3GAL3/ST3GAL5/NEU3
endo	SELENOAMINO ACID METABOLISM	1.59978	0.0444798	PAPSS2/PAPSS1/SEPHS2/AHCY/BUD23/TRMT11/HEMK1/LCMT1/SEPHS1/METTL6/METTL2B
endo	NR1H3 NR1H2 REGULATE GENE EXPRESSION LINKED TO CHOLESTEROL TRANSPORT AND EFFLUX	1.59796	0.0270992	APOE/APOC1/PLTP/ABCA1/NR1H3/ABCG1/ARL4C/APOC2
endo	INTEGRIN3 PATHWAY	1.59565	0.0344063	SPP1/FN1/PLAU/PDGFB/ITGAV/SDC4/COL1A1/COL1A2/CD47/ITGB3/TGFBI
endo	COMPLEMENT CASCADE	1.59125	0.0256772	C1QC/C1QB/C1QA/C3/CD59/CD81/C2/SERPING1/C3AR1/PROS1
endo	INTEGRIN1 PATHWAY	1.58973	0.0180539	SPP1/FN1/CD81/PLAU/F13A1/ITGA6/ITGAV/ITGA9/CD14/COL6A1/COL1A1/VCAM1/COL3A1/COL1A2/COL6A2/TGFBI/MDK/IGSF8/LAMB2/TGM2
endo	ARACHIDONIC ACID METABOLISM	1.56545	0.0438044	LTC4S/HPGDS/PTGS1/GPX3/AKR1C3/PTGDS/CBR1/PTGES2/PLA2G2D/GPX4/PLA2G12A/ALOX15B/GPX7/PLA2G4A/CYP2U1/CBR3
endo	COLLAGEN BIOSYNTHESIS AND MODIFYING ENZYMES	1.56214	0.0355918	P4HA1/COLGALT1/COL8A2/P3H2/PLOD3/P4HB/SERPINH1/COL6A1/COL1A1/COL3A1/COL1A2/PLOD1/P4HA2/COL6A2/PCOLCE2/PPIB
endo	ANTIGEN PROCESSING AND PRESENTATION	1.54678	0.0332838	LGMN/CTSL/HLA-DOA/CTSB/HLA-DQA1/HLA-DRB5/CALR/HLA-DQB1/HLA-DMA/HLA-DRB1/HLA-DMB/PDIA3/HLA-DPA1/HSPA5/CANX/HLA-DPB1/CD74
endo	MHC CLASS II ANTIGEN PRESENTATION	1.54589	0.00603181	LGMN/CTSL/HLA-DOA/TUBA1C/OSBPL1A/AP2A2/CTSK/TUBA1B/CTSB/CTSC/HLA-DQA1/CTSD/CTSF/TUBB2A/AP1B1/HLA-DRB5/HLA-DQB1/CTSA/HLA-DMA/AP1S1/HLA-DRB1/HLA-DMB/TUBB6/HLA-DPA1/KIFAP3/CLTC/CANX/DCTN4/HLA-DPB1/CD74/CTSH/CAPZB/CLTA/SEC23A/AP2M1/ACTR1B/DCTN6/TUBB4B/HLA-DRA/DYNC1I2/RILP/DCTN1/AP2S1/DCTN5/DCTN2/RACGAP1/ACTR10/SAR1B/RAB7A/AP2B1
endo	NON INTEGRIN MEMBRANE ECM INTERACTIONS	1.54294	0.0444798	FN1/ITGB5/SDC3/PDGFB/SDC2/ITGA6/ITGAV/PRKCA/SDC4/COL1A1/COL3A1/COL1A2/TRAPPC4/ITGB3
endo	RESPONSE TO ELEVATED PLATELET CYTOSOLIC CA2	1.51881	0.00771017	SELENOP/A2M/FN1/VEGFB/IGF1/LHFPL2/GAS6/LGALS3BP/CD9/CD109/PDGFB/SPARC/SERPING1/F13A1/CALU/ABCC4/PRKCA/CHID1/ECM1/CD63/CYB5R1/MAGED2/SCCPDH/PROS1/MANF/SERPINE1/LAMP2/FAM3C/SOD1/TEX264/HSPA5/ITGB3/TMX3/HGF/PHACTR2
endo	SENSORY PERCEPTION	1.5138	0.00442521	APOE/DHRS3/LPL/KCNMA1/SDC3/GSN/EPS8/SDC2/SCN1B/LRP12/APOC2/ADCY3/PRKCA/MYO7A/MYO1C/RDX/AKR1C3/TWF1/SDC4/RDH11/RBP1/BCO2/EPB41L1/GPC4/TRPM4/SPTAN1/CYP4V2/MPP1/EPB41L3/DHRS9/LRP10/CAPZB/RETSAT
endo	METABOLISM OF VITAMINS AND COFACTORS	1.50699	0.00454535	APOE/FOLR2/ENPP2/ACP5/LPL/SDC3/IDH1/CYB5A/SDC2/SLC2A1/LRP12/APOC2/VKORC1/MTHFD1L/NMRK1/SLC46A1/AKR1C3/ABCD4/PDZD11/PNPO/CD38/SLC23A2/SDC4/TCN2/RDH11/GCHFR/SLC25A19/RBP1/BCO2/QPRT/PDXK/MTHFD1/GPC4/MTR/FPGS/SHMT1/SLC52A2/VKORC1L1/PCCB/LMBRD1/NT5E/MOCS2/PC/MTHFD2/MMADHC/LRP10/CYB5R3/RETSAT/DHFR/NAXE/MMAB/FASN/SPR/PTS/MCCC2/SHMT2/PARP6/NUDT12/PARP10/NAXD/MCCC1/COQ5/PANK3/GSTO1/AGRN/PLB1/COQ9/PDSS2/NA…
endo	SPHINGOLIMETABOLISM	1.50594	0.0300532	UGCG/PLPP3/GM2A/HEXA/SGPP1/SGPL1/GBA/DEGS1/HEXB/NEU1/KDSR/ARSA/CTSA/B3GALNT1/ESYT1/GALC/GLA/SUMF2/ORMDL2/SUMF1/SMPD1/ACER3/GLB1
endo	SLC MEDIATED TRANSMEMBRANE TRANSPORT	1.48485	0.00843878	SLCO2B1/SLC40A1/SLC1A3/SLC7A8/SLC4A7/SLC16A10/SLC29A1/SLC39A10/SLC2A1/SLC29A3/SLC2A8/SLC12A5/SLC39A8/SLC7A11/ARL2/SLC41A2/SLC17A5/SLC9A7/SLC39A1/SLC11A2/CTNS/SLC1A4/SLC28A3/SLC31A1/PDZD11/SLC9A9/SLC22A18/SLC39A3/SLC5A3/SLC26A11/SLC39A7/SLC15A3/SLC9A6/SLC35B4/SLC36A1/SLC7A1/SLC50A1/SLC16A3/SLC25A4/SLC2A13/SLC25A26/SLC27A1/SLC3A2/SLCO4A1/SLC16A1/BSG/SLC39A6/SLC35D2/SLC27A4/SLC7A6/SLC35A2
endo	EXTRACELLULAR MATRIX ORGANIZATION	1.48419	0.000697139	A2M/SPP1/MMP9/FN1/MMP14/ITGB5/CTSL/ADAM9/SDC3/P4HA1/DST/PDGFB/SDC2/SPARC/HTRA1/CTSK/CTSB/MMP12/ITGA6/MMP2/ITGAV/CTSD/MMP19/ITGA9/PRKCA/COLGALT1/COL8A2/P3H2/PLOD3/LTBP3/SH3PXD2A/SDC4/P4HB/SERPINH1/TIMP2/SERPINE1/ICAM1/COL6A1/COL1A1/VCAM1/COL3A1/MMP7/LTBP2/COL1A2/TRAPPC4/PLOD1/P4HA2/CD151/MMP1/LOXL3/CD47/COL6A2/ITGB3/EMILIN1
endo	ASPARAGINE N LINKED GLYCOSYLATION	1.4781	0.000575737	CD59/MGAT4A/FUCA1/LMAN1/NPL/TUBA1C/TUBA1B/CTSC/MGAT5/ST6GAL1/AMDHD2/MAN1A1/TUBB2A/SLC17A5/CALR/NEU1/ST3GAL6/CTSZ/TMED9/STT3A/RPN2/CTSA/FUOM/MLEC/RENBP/SRD5A3/MPI/MCFD2/TMED3/TMED10/EDEM2/TUBB6/NUDT14/ALG2/DPM2/PDIA3/PGM3/DPAGT1/GNPNAT1/GANAB/FUT8/TRAPPC4/SPTAN1/TRAPPC2L/TFG/DAD1/RNF5/ALG5/MAN1C1/ALG3/ANKRD28/GLB1/MAN1B1/KDELR2/MVD/LMAN2/DERL2/RFT1/CANX/ALG8/TRAPPC3/DCTN4/KDELR1/DDOST/AMFR/DHDDS/M…
endo	CELL ADHESION MOLECULES CAMS	1.4734	0.0344063	ALCAM/CD276/CADM1/SDC3/HLA-DOA/SIGLEC1/SDC2/NECTIN2/CD40/ITGA6/HLA-DQA1/ITGAV/ITGA9/HLA-DRB5/CLDN23/PDCD1LG2/HLA-DQB1/CLDN7/HLA-DMA/SDC4/CD274/CLDN1/MPZL1/ICAM1/HLA-DRB1/HLA-DMB/CD22/VCAM1/CD28/CD226/ICOSLG/HLA-DPA1/CD80/HLA-DPB1/PTPRM/CD99/ITGB7/CD58/ITGB8
endo	THE CITRIC ACID TCA CYCLE AND RESPIRATORY ELECTRON TRANSPORT	1.38987	0.0359699	ME1/MPC2/PPARD/COX20/PDK1/VDAC1/SUCLG2/NDUFA8/LDHA/NDUFAF3/MT-ND6/NDUFAF4/NDUFAF6/TRAP1/NDUFS3/TMEM126B/GLO1/FAHD1/NDUFA5/NDUFV2/PDHA1/SLC16A3/COX16/IDH2/NDUFS4/SLC16A1/SUCLA2/NDUFAF1/BSG/NDUFV1/COX11/SDHA/FH/DLST/NDUFB6/LRPPRC/NDUFC1/DLAT/NDUFA9/PDHX/NDUFS5/NDUFS2/TIMMDC1/ETFA/NUBPL/NDUFB2/HAGH/NDUFAF5/COX6C/NDUFS8/ATP5PD/TACO1/ATP5MC1/COX5A/ATP5F1C/LDHB/NDUFS1/SDHD/UQCRQ/UQCR10/NDUFB8/SDHC/CYCS…
endo	METABOLISM OF CARBOHYDRATES	1.34094	0.0270992	SDC3/LYVE1/ABCC5/SDC2/AKR1B1/GNPDA1/HEXA/SLC2A1/PAPSS2/FBP1/HS3ST1/B3GNT7/B3GNT2/PRKACB/HEXB/ENO2/AKR1A1/PFKP/GPI/NAGLU/ST3GAL6/PAPSS1/SLC37A4/MDH1/CHST11/B3GAT3/GUSB/GBE1/DCXR/SDC4/HK2/PCK2/HS3ST2/SLC37A2/GALE/GPC4/MAN2B1/RPE/PGM2L1/CRYL1/B4GALT7/PRPS2/PFKFB2/G6PC3/DERA/NUP62/HYAL2/UGP2/GAA/GOT1/PRPS1/EXT2/GLB1/PFKL/ALDOC/PC/PGM2/FUT11/B3GALT6/B4GALT3/SLC35D2/ST3GAL1/NUP205/B4GAT1/GNS/ALDOA/GOT2…
endo	SIGNALING BY RECEPTOR TYROSINE KINASES	1.30685	0.00577793	APOE/SPP1/NRP1/MMP9/AXL/FN1/NRP2/VEGFB/SPRED1/IGF1/MATK/CYFIP1/MAPK13/TNS3/PDGFB/STMN1/SOCS6/EGR2/AP2A2/ATP6V0D2/SPARC/SPRY2/CXCL12/HSPB1/ITGAV/RALA/RPS6KA2/PRDM1/ITPR2/WWP1/DOCK7/FLT1/SGK1/CTNND1/PRKACB/PTPRO/NCK1/MKNK1/ATP6AP1/ATP6V0A1/PRKCA/TCF12/EGR1/PDGFC/POLR2H/ATP6V0C/ATP6V1C1/SPINT2/S100B/CD274/ABI2/RAPGEF1/ATP6V1D/DOCK1/COL6A1/ATP6V0E2/POLR2K/MEF2A/COL1A1/ID3/COL3A1/PRR5/STAM/PIK3R1/FER/…
endo	DDX58 IFIH1 MEDIATED INDUCTION OF INTERFERON ALPHA BETA	-1.5381	0.0396859	RPS27A/NKIRAS2/CASP10/PCBP2/NFKB2/NFKBIA/UBA52/UBE2D3/TNFAIP3/TANK/EP300/CYLD/CASP8/UBE2D1/CREBBP/NFKB1/NLRC5/MAP3K1/S100A12
endo	NATURAL KILLER CELL MEDIATED CYTOTOXICITY	-1.58749	0.0125889	BRAF/PIK3R5/SH2D1B/NFAT5/TNFRSF10C/KRAS/LCP2/TNFRSF10B/SOS2/FAS/PTPN6/RAF1/PAK1/PIK3CD/FCGR3B/MAPK1/SH3BP2/BID/MAP2K1/CHP1/PTK2B/CD244/RAC2/ICAM2/CD48/PRKCB/ITGAL/TNFSF10/FYN
endo	TCR PATHWAY	-1.67068	0.0200094	KRAS/STK39/LCP2/FYB1/PRKCE/PTPN6/PDPK1/CBL/CSK/MALT1/SH3BP2/MAP3K8/PTPRC/WAS/PTEN/FLNA/RASSF5/PRKCB/RASGRP2/FYN
endo	ACTIVATION OF THE MRNA UPON BINDING OF THE CAP BINDING COMPLEX AND EIFS AND SUBSEQUENT BINDING TO 43S	-1.76366	0.0129079	RPS25/RPS6/RPS3/RPS23/RPS15/RPS12/RPS28/RPS10/RPS8/RPS16/RPS17/RPS27/RPS3A/FAU/RPS15A/RPS24/RPS27A/RPS7/RPS11/RPS9/RPS26/EIF4B/RPS14/EIF2S3/EIF3A/EIF3H/RPS13/EIF3F/EIF3K/EIF3E/EIF3G/PABPC1/EIF3M/EIF3L
endo	NONSENSE MEDIATED DECAY NMD	-1.79687	0.000738724	RPL14/RPS29/RPS4X/ETF1/RPL36AL/RPL10A/RPL15/RPL13A/RPL41/RPL38/RPS25/RPL10/RPS6/RPL9/RPL13/RPS3/RPS23/RPS15/RPS12/RPS28/RPLP1/RPS10/RPS8/RPS16/PPP2CA/RPL22/RPL23A/RPL8/SMG7/RPS17/RPS27/RPS3A/RPL19/FAU/RPS15A/RPL28/RPLP2/RPL5/RPS24/RPL11/RPL31/RPL32/RPS27A/RPL24/RPL37/RPL29/RPL39/RPS7/RPS11/RPS9/RPL18/RPL4/RPS26/RPL18A/SMG1/RPL26/RPL27/RPL21/RPL6/UBA52/RPS14/RPL30/PNRC2/RPL34/RPL23/RPL35A/RPS13/RP…
endo	P38 ALPHA BETA PATHWAY	-1.80713	0.041125	LYN/RALB/MAP2K6/PAK1/DUSP1/MAPK14/HCK/MAP3K3/MAP2K3/FGR/FYN
endo	BIOCARTA FMLP PATHWAY	-1.81669	0.0387545	NFKBIA/MAP2K6/RAF1/PAK1/MAPK1/NFKB1/MAPK14/MAP2K1/NCF2/MAP3K1/NCF1/MAP2K3/PLCB1/FPR1
endo	DISEASES ASSOCIATED WITH O GLYCOSYLATION OF PROTEINS	-1.82277	0.016439	ADAMTS5/NOTCH1/GALNT3/NOTCH2/THBS1/LFNG/CFP
endo	TXA2PATHWAY	-1.83144	0.0108249	PIK3R5/ARRB2/GNG2/PRKCE/LYN/PLCB2/ROCK1/GRK3/PRKCD/MAPK14/PRKACA/HCK/ARHGEF1/PTGIR/GRK2/SLC9A3R1/PRKCB/FGR/FYN
endo	RESPONSE OF EIF2AK4 GCN2 TO AMINO ACID DEFICIENCY	-1.85655	0.000382557	RPL15/RPL13A/RPL41/RPL38/RPS25/CEBPB/RPL10/RPS6/RPL9/RPL13/RPS3/RPS23/RPS15/TRIB3/RPS12/RPS28/RPLP1/RPS10/RPS8/RPS16/RPL22/RPL23A/RPL8/RPS17/RPS27/RPS3A/RPL19/FAU/RPS15A/RPL28/RPLP2/RPL5/RPS24/RPL11/RPL31/ATF4/RPL32/RPS27A/RPL24/RPL37/RPL29/RPL39/RPS7/RPS11/RPS9/RPL18/RPL4/RPS26/RPL18A/RPL26/RPL27/RPL21/RPL6/UBA52/RPS14/RPL30/EIF2S3/RPL34/RPL23/RPL35A/RPS13/RPL7
endo	TOLL LIKE RECEPTOR TLR1 TLR2 CASCADE	-1.85882	0.000382557	RPS27A/NKIRAS2/ECSIT/DUSP7/NFKB2/SIGIRR/NFKBIA/UBA52/TLR4/IRAK2/RPS6KA5/MAP2K6/MAPK7/TLR2/MAPK1/MAP3K8/NFKB1/MAPK14/MAP2K1/MAPKAPK3/NOD2/DUSP6/MAP3K1/PELI2/MYD88/IRAK3/MAP2K3/CD36/S100A9/S100A8/S100A12
endo	BIOCARTA IL1R PATHWAY	-1.86946	0.0355918	NFKBIA/IRAK2/TGFB1/IL1RN/MAP2K6/NFKB1/MAPK14/IL1A/MAP3K1/IL1B/MYD88/IRAK3/MAP2K3
endo	EUKARYOTIC TRANSLATION INITIATION	-1.93907	0.000131601	RPL15/RPL13A/RPL41/RPL38/RPS25/RPL10/RPS6/RPL9/RPL13/RPS3/RPS23/RPS15/RPS12/RPS28/RPLP1/RPS10/RPS8/RPS16/RPL22/RPL23A/RPL8/RPS17/RPS27/RPS3A/RPL19/FAU/RPS15A/RPL28/RPLP2/RPL5/RPS24/RPL11/RPL31/RPL32/RPS27A/RPL24/RPL37/RPL29/RPL39/RPS7/RPS11/RPS9/RPL18/RPL4/RPS26/RPL18A/RPL26/RPL27/RPL21/RPL6/UBA52/EIF4B/RPS14/RPL30/EIF2S3/RPL34/EIF3A/EIF3H/RPL23/RPL35A/RPS13/EIF3F/RPL7/EIF3K/EIF3E/EIF3G/PABPC1/EI…
endo	EPHA FWDPATHWAY	-1.94254	0.0166049	PIK3R5/LYN/ROCK1/CBL/HCK/FGR/FYN
endo	ERBB NETWORK PATHWAY	-1.95886	0.0332838	EGFR/AREG/EREG/NRG1
endo	SIGNALING BY CSF3 G CSF	-1.99982	0.0162734	STAT5A/CSF3/GAB2/STAT3/STAT1/ELOB/KRAS/TYK2/RPS27A/JAK1/UBA52/UBE2D3/LYN/STAT5B/UBE2D1/HCK/JAK2/CSF3R
endo	BIOCARTA GRANULOCYTES PATHWAY	-2.00489	0.0300532	CXCL8/IL1A/PECAM1/ICAM2/ITGAL/SELL
endo	O GLYCOSYLATION OF TSR DOMAIN CONTAINING PROTEINS	-2.01252	0.00861483	ADAMTS5/THBS1/CFP
endo	ERBB2 ACTIVATES PTK6 SIGNALING	-2.03085	0.0273564	PTK6/EREG/NRG1
endo	INACTIVATION OF CSF3 G CSF SIGNALING	-2.03954	0.0123921	STAT5A/CSF3/STAT3/STAT1/ELOB/TYK2/RPS27A/JAK1/UBA52/UBE2D3/LYN/STAT5B/UBE2D1/HCK/JAK2/CSF3R
endo	BIOCARTA EGFR SMRTE PATHWAY	-2.04024	0.0258049	MAPK14/MAP2K1/ZBTB16/MAP3K1/RXRA/RARA
endo	RHO GTPASES ACTIVATE NADPH OXIDASES	-2.0434	0.0187282	MAPK1/PRKCD/MAPK14/NCF2/RAC2/NCF1/PRKCB/S100A9/S100A8
endo	PHASE 2 PLATEAU PHASE	-2.0768	0.0187282	CACNB1/KCNE1/KCNE3
endo	DECTIN 2 FAMILY	-2.08459	0.0200094	LYN/CLEC4A/CLEC4D/CLEC4E/FYN
endo	ERBB2 REGULATES CELL MOTILITY	-2.10182	0.0102864	EGFR/EREG/DIAPH1/NRG1
endo	EUKARYOTIC TRANSLATION ELONGATION	-2.35188	7.88942e-08	RPL14/RPS29/RPS4X/RPL36AL/RPL10A/EEF1A1/RPL15/RPL13A/RPL41/RPL38/RPS25/RPL10/RPS6/RPL9/RPL13/RPS3/RPS23/RPS15/RPS12/RPS28/RPLP1/RPS10/RPS8/RPS16/RPL22/RPL23A/RPL8/RPS17/RPS27/RPS3A/RPL19/FAU/RPS15A/RPL28/RPLP2/RPL5/RPS24/RPL11/RPL31/RPL32/RPS27A/RPL24/RPL37/RPL29/RPL39/RPS7/RPS11/RPS9/RPL18/RPL4/RPS26/RPL18A/RPL26/RPL27/RPL21/RPL6/UBA52/RPS14/RPL30/RPL34/EEF2/RPL23/RPL35A/RPS13/RPL7/EEF1D
endo	RIBOSOME	-2.44857	7.88942e-08	RPL14/RPS29/RPS4X/RPL36AL/RPL10A/RPL15/RPL13A/RPL41/RPL38/RPS25/RPL10/RPS6/RPL9/RPL13/RPS3/RPS23/RPS15/RPS12/RPS28/RPLP1/RPS10/RPS8/RPS16/RPL22/RPL23A/RPL8/RPS17/RPS27/RPS3A/RPL19/FAU/RPS15A/RPL28/RPLP2/RPL5/RPS24/RPL11/RPL31/RPL32/RPS27A/RPL24/RPL37/RPL29/RPL39/RPS7/RPS11/RPS9/RPL18/RPL4/RPS26/RPL18A/RPL26/RPL27/RPL21/RPL6/UBA52/RPL30/RSL24D1/RPL34/RPL23/RPL35A/RPS13/RPL7
kidney	SYSTEMIC LUPUS ERYTHEMATOSUS	2.44389	8.535e-08	C1QC/C3/C1QB/C1QA/HLA-DQA1/FCGR2B/HLA-DQB1/HLA-DQA2/HLA-DOA/HLA-DMA/HLA-DPB1/HLA-DRB1/HLA-DMB/HLA-DPA1/HLA-DRA/FCGR1A/CD40/C2/ACTN1/HLA-DRB5
kidney	PLASMA LIPOPROTEIN REMODELING	2.16012	0.000660373	APOE/APOC2/PLTP/LPL/ABCG1
kidney	ASTHMA	2.13371	0.000492099	FCER1A/HLA-DQA1/HLA-DQB1/HLA-DQA2/HLA-DOA/HLA-DMA/HLA-DPB1/HLA-DRB1/HLA-DMB/HLA-DPA1/HLA-DRA/CD40/HLA-DRB5
kidney	PLASMA LIPOPROTEIN ASSEMBLY REMODELING AND CLEARANCE	2.12436	0.000376483	APOC1/APOE/A2M/APOC2/NR1H3/PLTP/LPL/ABCG1/PRKACB/NPC2/LIPA/NCEH1/ABCA1/SCARB1
kidney	BIOCARTA CLASSIC PATHWAY	2.12378	6.95514e-05	C1QC/C3/C1QB/C1QA/C2
kidney	AUTOIMMUNE THYROID DISEASE	2.11871	0.000735368	HLA-DQA1/HLA-DQB1/HLA-DQA2/HLA-DOA/HLA-DMA/HLA-DPB1/HLA-DRB1/HLA-DMB/HLA-DPA1/HLA-DRA/CD40/HLA-DRB5
kidney	METABOLISM OF FAT SOLUBLE VITAMINS	2.11263	0.00185854	APOE/APOC2/LPL/SDC3/VKORC1/SDC2/BCO2/AKR1C3
kidney	ALLOGRAFT REJECTION	2.10613	0.00098879	HLA-DQA1/HLA-DQB1/HLA-DQA2/HLA-DOA/HLA-DMA/HLA-DPB1/HLA-DRB1/HLA-DMB/HLA-DPA1/HLA-DRA/CD40/HLA-DRB5
kidney	INTESTINAL IMMUNE NETWORK FOR IGA PRODUCTION	2.04575	0.00228981	HLA-DQA1/HLA-DQB1/HLA-DQA2/HLA-DOA/HLA-DMA/HLA-DPB1/HLA-DRB1/HLA-DMB/HLA-DPA1/HLA-DRA/CD40/HLA-DRB5/CXCL12/CXCR4
kidney	GRAFT VERSUS HOST DISEASE	2.02565	0.00771055	HLA-DQA1/HLA-DQB1/HLA-DQA2/HLA-DOA/HLA-DMA/HLA-DPB1/HLA-DRB1/HLA-DMB/HLA-DPA1/HLA-DRA/HLA-DRB5/CD80/KLRD1
kidney	SCAVENGING BY CLASS A RECEPTORS	1.99578	0.00934041	APOE/MSR1/CALR
kidney	VISUAL PHOTOTRANSDUCTION	1.99507	0.00196781	APOE/APOC2/DHRS3/LPL/SDC3/DHRS9/SDC2/BCO2/AKR1C3
kidney	TYPE I DIABETES MELLITUS	1.97667	0.00939145	HLA-DQA1/HLA-DQB1/HLA-DQA2/HLA-DOA/HLA-DMA/HLA-DPB1/HLA-DRB1/HLA-DMB/HLA-DPA1/HLA-DRA/HLA-DRB5
kidney	PLASMA LIPOPROTEIN ASSEMBLY	1.93486	0.0105768	APOC1/APOE/A2M/APOC2/PRKACB
kidney	BIOCARTA COMP PATHWAY	1.92796	0.00771055	C1QC/C3/C1QB/C1QA/C2
kidney	PD 1 SIGNALING	1.9108	0.0202854	HLA-DQA1/HLA-DQB1/HLA-DQA2/HLA-DPB1/HLA-DRB1/HLA-DQB2/HLA-DPA1/HLA-DRA/HLA-DRB5/PDCD1LG2
kidney	ANTIGEN PROCESSING AND PRESENTATION	1.90704	0.00551908	HLA-DQA1/HLA-DQB1/HLA-DQA2/HLA-DOA/HLA-DMA/HLA-DPB1/HLA-DRB1/HLA-DMB/HLA-DPA1/CIITA/CD74/CTSL/LGMN/HLA-DRA/CALR/HLA-DRB5/CTSB
kidney	GENERATION OF SECOND MESSENGER MOLECULES	1.88742	0.0324736	HLA-DQA1/HLA-DQB1/HLA-DQA2/HLA-DPB1/HLA-DRB1/HLA-DQB2/HLA-DPA1/NCK1/HLA-DRA/HLA-DRB5
kidney	BIOCARTA TH1TH2 PATHWAY	1.8849	0.0145704	IL18/HLA-DRB1/HLA-DRA/IFNGR1/CD40/HLA-DRB5
kidney	COLLAGEN DEGRADATION	1.86464	0.00934041	MMP9/MMP14/MMP2/CTSD/CTSL/ADAM9/COL9A2/COL8A2/CTSB
kidney	PLASMA LIPOPROTEIN CLEARANCE	1.84965	0.0156628	APOC1/APOE/NR1H3/NPC2/LIPA/NCEH1/SCARB1
kidney	RESPONSE TO METAL IONS	1.8475	0.0324245	MT1G/MT1H/MT1X/MT1E/MT1F/MT2A/MT1M
kidney	COLLAGEN FORMATION	1.7836	0.0192085	MMP9/DST/CTSL/P3H2/PPIB/ITGA6/COL9A2/COL8A2/CTSB/CD151/SERPINH1/LOXL3
kidney	TYROSINE METABOLISM	1.76444	0.0447338	IL4I1/FAH/COMT/GSTZ1/HEMK1/MIF/BUD23/TRMT11/GOT2/ADH5/GOT1
kidney	PYRUVATE METABOLISM	1.70815	0.0293299	AKR1B1/LDHB/HAGHL/GRHPR/ACAT1/PCK2/ALDH7A1/ALDH2/MDH1/GLO1/ACAT2/ME1
kidney	COLLAGEN BIOSYNTHESIS AND MODIFYING ENZYMES	1.68737	0.0373862	P3H2/PPIB/COL9A2/COL8A2/SERPINH1/ADAMTS2/P4HB/BMP1/COL6A1/PLOD1/COL6A2/PLOD3/COL27A1
kidney	MHC CLASS II ANTIGEN PRESENTATION	1.67904	0.00976035	HLA-DQA1/HLA-DQB1/HLA-DQA2/HLA-DOA/HLA-DMA/HLA-DPB1/CTSH/HLA-DRB1/HLA-DQB2/HLA-DMB/HLA-DPA1/TUBA1B/CD74/CTSD/CTSL/LGMN/CTSC/HLA-DRA/TUBA1C/OSBPL1A/HLA-DRB5/CTSF/TUBB6/CTSB
kidney	CELL ADHESION MOLECULES CAMS	1.65919	0.00863506	HLA-DQA1/HLA-DQB1/HLA-DQA2/CLDN1/ALCAM/HLA-DOA/HLA-DMA/HLA-DPB1/CADM1/HLA-DRB1/HLA-DMB/HLA-DPA1/ITGAV/NECTIN2/SDC3/HLA-DRA/CD58/ITGA6/CD40/HLA-DRB5/SDC2/CD276/VCAM1/CD226/PDCD1LG2/CD80/JAM2
kidney	CELL CYCLE MITOTIC	-1.31332	0.033743	SEH1L/NUMA1/SET/LIN54/PHF8/LEMD3/CDC16/CENPC/E2F6/NUP155/CHMP7/PSMD6/CDKN2B/RPA4/NUP88/PSMD4/DYNLL2/FBXL18/NUP133/ENSA/IST1/B9D2/YWHAG/USO1/PDS5B/PPP2R2D/PSMD12/NDE1/E2F2/PSMB2/UBA52/ODF2/CKS1B/NUP153/POM121C/SSNA1/CSNK2B/AURKA/UBE2I/RFC1/UBC/CEP63/NUP62/PSMB3/CSNK1D/CLASP1/WAPL/E2F3/PDS5A/PCM1/CSNK2A1/SIRT2/CEP192/MAD1L1/AKT1/PPP2R1B/ANKLE2/CEP164/PSMC6/PSME4/PSMC1/DBF4/POLD3/KPNB1/CDC26/LMNB1/S…
kidney	SIGNALING BY GPCR	-1.31564	0.0445024	ARHGEF6/ARHGEF3/CMKLR1/PDE4A/PSAP/HCAR3/CREB1/RPS6KA3/CYSLTR2/CASR/DGKZ/ADORA2A/PPP3R1/GPR35/PRKX/SOS1/HCAR2/PRKAR2A/ITSN1/PPP3CA/VAV1/MGLL/PPP2R1A/GNA13/NLN/PTGIR/PIK3CG/SRC/DGKD/ARHGEF2/GRB2/TIAM1/RGS19/NRAS/FGD2/AHCYL1/ARRB1/FGD3/P2RY2/GABBR1/ADM/BTK/ARHGEF18/GPSM3/LTB4R/GNAQ/SOS2/CDC42/RGS18/PDPK1/PLCB1/PLCB2/PROK2/ADGRE3/CCR1/MAPK7/PDE4D/ARHGEF1/PPP2CA/FGD4/RHOA/S1PR3/PLPPR2/PRKAR1A/ADCY7/PR…
kidney	PLATELET ACTIVATION SIGNALING AND AGGREGATION	-1.3696	0.0447338	PSAP/STXBP3/VEGFA/FERMT3/PTPN1/PTPN11/DGKZ/SOS1/RHOG/VAV1/MGLL/GNA13/PIK3CG/SRC/DGKD/GRB2/FCER1G/TF/TLN1/ARRB1/RAP1A/GNAQ/CDC42/PDPK1/SYK/TAGLN2/TGFB1/RHOA/ANXA5/WDR1/LCP2/MAPK14/ACTN4/PLEK/CRK/GNG10/GNAI2/SERPINA1/ARRB2/GNB2/GNB1/SRGN/APLP2/CAP1/TUBA4A/CSK/YWHAZ/GNAI3/PTPN6/MAPK1/RHOB/ALDOA/VCL/RAP1B/RASGRP2/GNG2/FYN/RAC2/CFD/LYN/TIMP1/PRKCB/CD36/PECAM1/FLNA/STXBP2/THBS1
kidney	HEMOSTASIS	-1.39231	0.00553421	VEGFA/ATP2A2/P2RX7/FERMT3/PTPN1/PTPN11/DGKZ/ITPK1/KIF3B/SOS1/TP53/RHOG/PRKAR2A/HDAC1/CD47/PRCP/SERPINB8/VAV1/MGLL/ITGAM/SRI/PPP2R1A/GNA13/PTGIR/PIK3CG/SRC/PHF21A/CD244/DGKD/GRB2/KIF5B/FCER1G/PPP2R5E/NRAS/CAPZA2/TF/TLN1/ARRB1/MFN1/SH2B2/RAP1A/GNAQ/NFE2/TUBA1A/CDC42/KIF22/PDPK1/SYK/TAGLN2/TGFB1/PPP2CA/RHOA/DOCK8/ANXA5/WDR1/DOCK5/LCP2/S100A10/PRKAR1A/MAPK14/PRKACA/ACTN4/ITGAX/PLEK/JMJD1C/CRK/GNG10/G…
kidney	HIV INFECTION	-1.42018	0.022902	NUP93/SEH1L/NCBP1/GTF2F1/GTF2H1/TCEA1/ELL/NUP155/CHMP7/CHMP5/PSMD6/POLR2E/POLR2D/AP2B1/SSRP1/NUP88/XRCC4/PSMD4/NUP133/PSMD12/PSMB2/AP2S1/UBA52/NCBP2/TAF1/NUP153/TAF6/POM121C/UBC/NUP62/PSMB3/RNGTT/TAF11/ELOA/TAF9/NELFE/PSMC6/PSME4/PSMC1/KPNB1/CTDP1/TAF4/PSME3/TAF2/NUP98/CUL5/TAF10/RBX1/KPNA1/RAE1/CHMP3/PSMD7/PSMA5/PSMB4/GTF2E2/ARF1/UBAP1/CHMP4B/SUPT5H/PSMD1/POLR2B/POM121/PSMD13/CHMP2A/VTA1/SKP1/TA…
kidney	LEISHMANIA INFECTION	-1.42435	0.0323976	MYO5A/CREB1/P2RX7/CYSLTR2/ADORA2A/PRKX/IL10/PRKAR2A/VAV1/ARPC3/PTGIR/FCGR3A/SRC/GRB2/AHCYL1/ADM/BTK/ARPC4/CDC42/PYCARD/MYO9B/SYK/NFKB2/NFKB1/ARPC1A/ACTR3/ARPC1B/GSDMD/WIPF1/PRKAR1A/MAPK14/ADCY7/PRKACA/ARPC5/NLRP3/PLK2/NCKAP1L/PSTPIP1/ARPC2/CRK/GNG10/GNAI2/WAS/WASF2/GNB2/GNB1/MYH9/CYFIP2/HRH2/PTGER2/ACTR2/MEFV/GNAI3/MAPK1/HCK/IL1B/GPBAR1/CASP1/GNG2/FYN/LYN/FGR
kidney	RAC1 GTPASE CYCLE	-1.4319	0.0370032	ITGB1/TRIO/ARAP3/VAV3/VAMP3/SRGAP2/FAM13A/PIK3CA/SNAP23/PAK1/ARHGAP29/VAV2/CYBA/WIPF2/GMIP/NISCH/TIAM2/BRK1/ARHGEF6/TAGAP/CHN2/ARHGAP45/RAB7A/TAOK3/ARHGDIB/SOS1/NCF1/LBR/VAV1/FAM13B/ARHGAP1/GNA13/CDC42EP4/TIAM1/PKN2/ARHGEF18/ARHGAP27/ARHGAP30/SOS2/SH3BP1/CDC42/ARAP1/MYO9B/EMD/PAK2/ARHGAP4/DOCK8/MPP7/ARHGDIA/WIPF1/DOCK5/FMNL1/NCKAP1L/WAS/ARHGAP26/DOCK11/WASF2/IQGAP2/CYBB/DOCK2/CYFIP2/IQGAP1/PKN1/A…
kidney	RHO GTPASE CYCLE	-1.43539	0.00294422	PLEKHG5/COPS2/JUP/PEAK1/PTPN13/STAM2/ITGB1/RAPGEF1/TRIO/ARAP3/VAV3/VAMP3/RND3/SRGAP2/FAM13A/PIK3CA/STARD8/SNAP23/PAK1/ARHGAP29/GFOD1/VAV2/ABCD3/CAPZB/NIPSNAP2/ANKLE2/VIM/CKB/CYBA/ACTB/RNF20/LMNB1/EPSTI1/WIPF2/GMIP/CCDC88A/DNMBP/NISCH/ARHGAP19/ROCK2/CDC42SE2/TIAM2/CPNE8/USP9X/BRK1/ACTG1/ARHGEF6/ARHGEF3/TAGAP/ANKFY1/CHN2/ARHGAP45/HNRNPC/RAB7A/TAOK3/SH3RF1/ARHGDIB/SOS1/RHOG/ITSN1/TJP2/NCF1/LBR/VAV1/…
kidney	CLASS I MHC MEDIATED ANTIGEN PROCESSING PRESENTATION	-1.44742	0.00405677	SEC24B/UBE3B/SEC24A/HLA-C/UBC/VAMP3/PSMB3/AREL1/UBA6/TAP2/RLIM/UBE2J2/MEX3C/SNAP23/HLA-B/HERC1/RNF111/SEC24D/UBE2F/ERAP1/FCGR1B/TPP2/CYBA/PSMC6/PSME4/PSMC1/ARIH2/RNF126/KLHL9/CDC26/CHUK/KCTD7/PSME3/ANAPC5/HUWE1/TAP1/CUL5/SEC61A1/UBE2D2/TRIM21/RBX1/PSMD7/PSMA5/UBR1/PSMB4/HLA-E/HERC3/FBXO27/UBE2Q1/SEC23A/RBCK1/UBE2A/PSMD1/FBXO9/HERC5/UBA3/PSMD13/VHL/MGRN1/WWP1/SKP1/SH3RF1/FBXL3/UBE4A/FBXW5/FBXO11/U…
kidney	ANTIGEN PROCESSING UBIQUITINATION PROTEASOME DEGRADATION	-1.46118	0.0055516	UBE2L3/ELOC/ASB7/UBE2V2/FBXL20/RCHY1/RNF114/STUB1/NPEPPS/NEDD4/KLHL21/RNF115/CDC16/FBXO6/RNF41/PSMD6/LRR1/RNF34/LTN1/MIB2/ZNRF1/PSMD4/FBXL18/FBXW2/RNF220/PSMD12/UBE2G2/PSMB2/RNF19A/UBA52/RNF130/UBE3B/UBC/PSMB3/AREL1/UBA6/RLIM/UBE2J2/MEX3C/HERC1/RNF111/UBE2F/TPP2/PSMC6/PSME4/PSMC1/ARIH2/RNF126/KLHL9/CDC26/KCTD7/PSME3/ANAPC5/HUWE1/CUL5/UBE2D2/TRIM21/RBX1/PSMD7/PSMA5/UBR1/PSMB4/HERC3/FBXO27/UBE2Q1/R…
kidney	ANTI INFLAMMATORY RESPONSE FAVOURING LEISHMANIA PARASITE INFECTION	-1.4656	0.0474421	CREB1/CYSLTR2/ADORA2A/PRKX/IL10/PRKAR2A/PTGIR/FCGR3A/SRC/AHCYL1/ADM/SYK/PRKAR1A/MAPK14/ADCY7/PRKACA/PLK2/GNG10/GNAI2/GNB2/GNB1/MYH9/HRH2/PTGER2/GNAI3/HCK/GPBAR1/GNG2/FYN/LYN/FGR
kidney	ESR MEDIATED SIGNALING	-1.46871	0.0373862	AKT2/SRF/KAT2B/MED1/ZNF217/CREB1/POLR2B/AGO1/HDAC1/FKBP5/SRC/SMC3/NRAS/SMC1A/NCOA2/TLE3/TNRC6B/GTF2A2/ZDHHC7/PDPK1/DDX5/NCOA3/RAD21/HSP90AA1/AGO4/S1PR3/CREBBP/UHMK1/SP1/NCOA1/GNG10/GNAI2/YY1/GNB2/CCNT1/GNB1/KRAS/STAG2/FOXO3/CDKN1B/GNAI3/AGO2/MAPK1/EP300/FOSB/JUND/GNG2/HBEGF/CHD1/AREG/EREG
kidney	UB SPECIFIC PROCESSING PROTEASES	-1.47319	0.0173257	PSMC6/PSME4/PSMC1/BIRC2/PSME3/TADA3/SMAD1/MAT2B/USP24/TAF10/USP9X/PSMD7/USP37/PSMA5/PSMB4/USP33/MDM4/PSMD1/PSMD13/TRRAP/TNKS2/IFIH1/TP53/PSME2/FKBP8/PSMA7/DDX58/PSMD9/PSME1/USP48/ATXN7/RHOT1/SMAD3/ARRB1/USP47/USP34/USP25/BECN1/MDM2/PSMB8/SIAH2/PSMA2/PSMB10/PSMA6/SMAD2/PSMB9/CYLD/USP7/USP16/USP8/PSMA4/ARRB2/NFKBIA/USP3/PTEN/BIRC3/USP15
kidney	SUMOYLATION	-1.47953	0.0169242	NRIP1/NUP93/SEH1L/HDAC7/NUP155/PPARA/PHC1/NUP88/XRCC4/NUP133/SIN3A/CBX5/ZBED1/SENP2/UBA2/RWDD3/NUP153/POM121C/AURKA/NCOR2/UBE2I/RELA/PHC3/NUP62/PIAS4/MRTFA/SUMO1/NR1H2/NUP98/RAE1/TDG/SUZ12/IKBKE/PIAS1/NR3C1/CTBP1/NOP58/POM121/RNF168/SENP5/HNRNPC/VHL/HIC1/TP53/HDAC1/SP100/SMC5/TOP1/SMC3/CBX4/NUP210/SMC1A/NCOA2/DDX5/NFKB2/HIPK2/MDM2/TOP2B/RAD21/TPR/HNRNPK/CREBBP/HDAC4/NUP50/DDX17/VDR/NUP58/NCOA1/SP…
kidney	MAPK FAMILY SIGNALING CASCADES	-1.48428	0.00423454	RASAL3/RANBP9/TNRC6A/PPP2R1B/PSMC6/PSME4/PSMC1/AGO3/ACTB/ARAF/DUSP7/PSME3/GOLGA7/RBX1/TYK2/JAK3/PSMD7/ACTG1/RAF1/PSMA5/PSMB4/MAPK6/PSMD1/PSMD13/DNAJB1/PTPN11/MARK3/AGO1/SOS1/MAP2K2/RAPGEF2/PPP2R1A/RASA3/PSME2/SRC/PSMA7/ABHD17A/PPP1CC/GRB2/PSMD9/KSR1/PSME1/PPP2R5E/FOXO1/NRAS/TLN1/ARRB1/LYPLA1/MAP2K1/RASA2/TNRC6B/RAP1A/CDC42/NCOA3/PSMB8/PAK2/PSMA2/CSF2RB/AGO4/PPP2CA/PSMB10/PSMA6/PSMB9/CUL3/RASGRP4/…
kidney	TOLL LIKE RECEPTOR 9 TLR9 CASCADE	-1.48673	0.046233	RELA/UBC/TAB3/RPS6KA1/DUSP3/TAB2/PPP2R1B/EEA1/FOS/CHUK/DUSP7/TICAM1/PELI3/MAP2K4/CREB1/RPS6KA3/SKP1/MAP3K8/PPP2R1A/NOD2/MAP2K1/PIK3C3/NFKB2/NFKB1/UBE2V1/PELI1/MAPK7/PPP2CA/MAPKAPK2/MAPK14/PELI2/TLR4/IRF7/MAPKAPK3/NFKBIA/MAPK1/MAP2K3/MAP3K1/DUSP6/RIPK2/MYD88/S100A12
kidney	LEUKOCYTE TRANSENDOTHELIAL MIGRATION	-1.48787	0.0405735	NCF1/VAV1/ITGAM/PIK3CG/ICAM1/PIK3CD/RAP1A/CDC42/CTNNA1/PXN/CTNNB1/MYL12A/RHOA/MYL12B/MAPK14/ACTN4/GNAI2/ROCK1/CYBB/PTK2B/GNAI3/MSN/ITGA4/ITGAL/VCL/VASP/RAP1B/RASSF5/NCF2/EZR/RAC2/PRKCB/PECAM1
kidney	FC EPSILON RECEPTOR FCERI SIGNALING	-1.49048	0.0293299	PPP3CB/VAV3/RELA/UBC/PSMB3/TAB3/SHC1/PIK3CA/CALM1/PAK1/TAB2/PIK3CB/VAV2/PSMC6/PSME4/PSMC1/BCL10/FOS/CHUK/PSME3/UBE2D2/PSMD7/PSMA5/PSMB4/MAP2K4/PSMD1/PSMD13/SKP1/PPP3R1/SOS1/PPP3CA/VAV1/PSME2/PSMA7/GRB2/PSMD9/PSME1/FCER1G/NRAS/AHCYL1/BTK/PDPK1/SYK/NFKB1/PSMB8/PAK2/UBE2V1/UBE2D1/NFATC1/PSMA2/PSMB10/PSMA6/LCP2/PSMB9/RASGRP4/NFATC3/PSMA4/KRAS/NFKBIA/MAPK1/MAP3K1/MALT1/RASGRP2/FYN/LYN
kidney	SIGNALING BY THE B CELL RECEPTOR BCR	-1.49103	0.0436843	ORAI1/PPP3CB/RELA/UBC/PSMB3/CALM1/PSMC6/PSME4/PSMC1/BCL10/CHUK/PSME3/PSMD7/PSMA5/PSMB4/STIM1/PSMD1/PSMD13/SKP1/PPP3R1/SOS1/PPP3CA/VAV1/PSME2/PSMA7/GRB2/PSMD9/PSME1/DAPP1/NRAS/AHCYL1/SH3KBP1/BTK/PIK3CD/SYK/NFKB1/PSMB8/NFATC1/PSMA2/PSMB10/PSMA6/PSMB9/NFATC3/REL/PSMA4/KRAS/CD79B/NFKBIA/FKBP1A/PTPN6/PIK3AP1/MALT1/FYN/LYN/PRKCB
kidney	CELLULAR SENESCENCE	-1.49381	0.0232603	HIRA/MOV10/CDKN2B/PHC1/ID1/IGFBP7/MAP2K7/E2F2/UBA52/RELA/UBC/PHC3/RBBP7/TINF2/RPS6KA1/E2F3/TNRC6A/RAD50/AGO3/FOS/CDC26/LMNB1/ANAPC5/SUZ12/MAP2K4/TFDP1/RPS6KA3/MAP3K5/MDM4/ATM/ANAPC15/AGO1/TP53/TERF2IP/CBX6/CBX4/TNRC6B/STAT3/UBE2S/NBN/NFKB1/MDM2/UBE2D1/MAPK7/AGO4/MAPKAPK2/MAPK14/SP1/UBN1/ETS2/CDKN1A/CXCL8/MAPKAPK3/CDKN1B/MAP4K4/CDKN2D/MAPK1/MAP2K3/CEBPB/KDM6B
kidney	WNT SIGNALING PATHWAY	-1.49397	0.0309943	FOSL1/CHD8/FRAT1/NFAT5/CSNK2A1/PPP2R1B/RBX1/ROCK2/TBL1XR1/CTBP1/SKP1/PPP3R1/PRKX/TP53/PPP3CA/PPP2R1A/GSK3B/PPP2R5E/SMAD3/PLCB1/PLCB2/CTNNB1/NFATC1/FRAT2/CSNK1A1/PPP2CA/RHOA/APC/CHP1/SMAD2/CREBBP/PRKACA/NFATC3/CTBP2/PPP2R5C/ROCK1/TBL1X/PPP2R5A/PSEN1/EP300/CCND3/RAC2/TCF7L2/PRKCB
kidney	RAB GEFS EXCHANGE GTP FOR GDP ON RABS	-1.49695	0.0423491	RAB6A/RAB5A/RAB5C/CCZ1B/AKT1/RIN2/RAB18/RAB3GAP1/TRAPPC1/AKT2/RAB1A/CHML/TRAPPC11/RAB7A/TRAPPC8/ULK1/HPS1/DENND3/RAB8A/RAB1B/RAB31/DENND6A/SBF2/DENND4A/MON1B/RIN1/RAB3GAP2/GAPVD1/GDI2/TRAPPC10/DENND1A/DENND5A/CCZ1/DENND4B/RAB8B/RIN3/RAB21/RAB10/RABGEF1/RAB27A/TRAPPC5
kidney	NEUROTRANSMITTER RECEPTORS AND POSTSYNAPTIC SIGNAL TRANSMISSION	-1.50016	0.0315982	CREB1/RPS6KA3/NPTN/PRKX/PRKAR2A/LIN7C/SRC/NRAS/GABBR1/PRKAG2/TUBA1A/PDPK1/PLCB1/PLCB2/MDM2/CAMK1/PRKAR1A/ADCY7/PRKACA/GNG10/GNAI2/AP2A1/GNB2/GNB1/KRAS/NRG1/CAMKK2/TUBA4A/GNAI3/MAPK1/NRGN/PPM1F/GNG2/PRKCB
kidney	PROSTATE CANCER	-1.50194	0.0397486	RELA/PIK3CA/E2F3/PIK3CB/AKT1/CHUK/ARAF/AKT2/RAF1/CREB1/CASP9/SOS1/TP53/GSTP1/MAP2K2/PIK3CG/GSK3B/GRB2/FOXO1/NRAS/MAP2K1/PIK3CD/SOS2/PDPK1/NFKB1/MDM2/CTNNB1/HSP90AA1/ATF4/CREBBP/BRAF/CDKN1A/KRAS/NFKBIA/CDKN1B/MAPK1/EP300/PTEN/TCF7L2
kidney	RHOB GTPASE CYCLE	-1.50289	0.0478559	JUP/VAMP3/STARD8/SNAP23/VAV2/ROCK2/ARHGEF3/TJP2/ARHGAP1/ARHGEF2/PKN2/SLK/FLOT2/MYO9B/ARHGEF1/ROCK1/ARHGAP26/AKAP13/PKN1/STK10/TFRC/DIAPH1/RHOB/ERBIN
kidney	SIGNALING BY NTRKS	-1.5046	0.0274312	FOSL1/SHC1/PIK3CA/RPS6KA1/DUSP3/PIK3CB/PPP2R1B/FOS/DUSP7/SRF/EGR3/RIT1/CREB1/RPS6KA3/BAX/PTPN11/ADORA2A/NAB1/LYL1/SOS1/MAP2K2/PPP2R1A/SRC/GRB2/MEF2D/TIAM1/NRAS/MAP2K1/JUNB/RAP1A/STAT3/KIDINS220/CLTC/MAPK7/PPP2CA/RHOA/MAPKAPK2/MAPK14/CRK/BRAF/AP2A1/RALB/IRS2/TRIB1/YWHAB/KRAS/MAPKAPK3/MAPK1/EP300/FOSB/DUSP6/JUND/FYN
kidney	SIGNALING BY INTERLEUKINS	-1.50752	0.000735368	RELA/CXCL1/UBC/PSMB3/TAB3/SHC1/PIK3CA/PTPN2/STX3/CLCF1/RPS6KA1/VAMP7/DUSP3/TAB2/HNRNPDL/SOD1/PIK3CB/AKT1/PPP2R1B/SMARCA4/VIM/PSMC6/ITGB2/PSME4/PSMC1/ANXA2/HSPA8/FOS/CHUK/TBK1/LMNB1/DUSP7/PSME3/PTPN9/IL1R2/RBX1/TYK2/PTPN18/JAK3/PSMD7/PITPNA/PSMA5/PSMB4/PELI3/IL27RA/MAP2K4/ARF1/CREB1/TCP1/RPS6KA3/VEGFA/PSMD1/PSMD13/LGALS9/STAT5B/PTPN11/TNF/IL15/SKP1/CASP3/SOS1/TP53/IL10/MAP3K8/OSM/SIGIRR/VAMP2/VAV1…
kidney	MAPK SIGNALING PATHWAY	-1.51437	0.00853215	RELB/HSPA8/FOS/CHUK/MAP4K2/DUSP7/IL1R2/AKT2/SRF/RAF1/MAP2K4/RPS6KA3/MAP3K5/MKNK1/TNF/PPP3R1/TAOK3/CASP3/PRKX/SOS1/TP53/MAP3K8/FAS/PPP3CA/MAP2K2/RAPGEF2/MAP3K4/GRB2/NRAS/HSPA1B/MKNK2/ARRB1/MAP2K1/RASA2/RAP1A/STK4/SOS2/CDC42/MAP3K2/NFKB2/NFKB1/PAK2/MAPK7/HSPA1A/TGFB1/CHP1/ATF4/MAPKAPK2/MAPK14/RASGRP4/MAP3K11/PRKACA/TAOK1/CRK/DUSP5/BRAF/ARRB2/MAP3K20/DUSP2/KRAS/DUSP1/MAPKAPK3/RRAS/MAP4K4/MAPK1/MAP3K…
kidney	SIGNALING BY NOTCH	-1.51743	0.00934041	UBC/RAB6A/PSMB3/MFNG/E2F3/MIB1/TNRC6A/AKT1/ADAM17/PSMC6/PSMC1/AGO3/NOTCH1/PSME3/POFUT1/YBX1/B4GALT1/RBX1/PSMD7/KAT2B/PSMA5/TBL1XR1/PSMB4/NOTCH4/CREB1/TFDP1/PSMD1/APH1B/ATP2A2/PSMD13/SKP1/AGO1/TP53/HDAC1/SEL1L/WWP2/ITCH/PSME2/PSMA7/PSMD9/PSME1/SMAD3/ARRB1/TLE3/TNRC6B/SNW1/PSMB8/PSMA2/AGO4/PSMB10/PSMA6/CREBBP/PSMB9/HDAC4/FBXW7/HES1/NCOR1/PSMA4/ARRB2/TBL1X/IKZF1/PSEN1/ADAM10/NUMB/NEURL1/YWHAZ/AGO2/N…
kidney	BETA CATENIN INDEPENDENT WNT SIGNALING	-1.51771	0.0169242	PSMD6/GNG5/AP2B1/MOV10/PSMD4/GNB5/PSMD12/PSMB2/AP2S1/UBA52/PPP3CB/UBC/PSMB3/CALM1/TNRC6A/PSMC6/PSME4/PSMC1/AGO3/PSME3/PFN1/PSMD7/PSMA5/PSMB4/PSMD1/PSMD13/AGO1/PPP3R1/PPP3CA/PSME2/PSMA7/PSMD9/PSME1/CLTB/TNRC6B/PLCB1/PLCB2/PSMB8/CLTC/CTNNB1/NFATC1/PSMA2/AGO4/PSMB10/RHOA/PSMA6/PSMB9/GNG10/PSMA4/ARRB2/AP2A1/GNB2/GNB1/KRAS/AGO2/GNG2/RAC2/TCF7L2/PRKCB
kidney	NUCLEOTIDE BINDING DOMAIN LEUCINE RICH REPEAT CONTAINING RECEPTOR NLR SIGNALING PATHWAYS	-1.5196	0.0410484	AAMP/UBA52/IRAK1/RELA/UBC/TAB3/TAB2/CARD9/BIRC2/CHUK/PANX1/SUGT1/CASP8/P2RX7/CASP9/ITCH/NOD2/PYCARD/NFKB2/NFKB1/UBE2V1/TNFAIP3/NLRC4/CASP4/CYLD/MAPK14/NLRP3/PSTPIP1/NLRP1/MEFV/RIPK2/BIRC3/CASP1
kidney	ENDOTHELIN PATHWAY	-1.52196	0.0455291	AKT1/FOS/PRKCD/RAF1/CYSLTR2/MAP2K2/SRC/MAP2K1/GNAQ/CDC42/PLCB1/PLCB2/RHOA/MAPK14/ADCY7/CRK/GNAI2/JAK2/PTK2B/GNAI3/MAPK1/PRKCB
kidney	REGULATION OF ACTIN CYTOSKELETON	-1.52236	0.0108024	ARAF/PFN1/LIMK2/PIKFYVE/ROCK2/TIAM2/BRK1/ACTG1/RAF1/ARHGEF6/SOS1/MAP2K2/VAV1/ARPC3/ITGAM/GNA13/PIK3CG/PPP1CC/TIAM1/NRAS/FGD3/MAP2K1/PIK3CD/SOS2/ARPC4/CDC42/PXN/PAK2/ARPC1A/MYL12A/ARHGEF1/RHOA/MYL12B/PIP4K2A/PPP1R12A/ARPC1B/APC/ACTN4/ARPC5/ITGAX/NCKAP1L/DIAPH2/ARPC2/CRK/BRAF/WAS/ROCK1/PPP1CA/WASF2/IQGAP2/PPP1CB/MYH9/KRAS/CYFIP2/RRAS/IQGAP1/CSK/MSN/MAPK1/ITGA4/DIAPH1/SSH2/ITGAL/VCL/EZR/RAC2
kidney	ERBB1 DOWNSTREAM PATHWAY	-1.52984	0.0223287	PIK3CB/VAV2/AKT1/FOS/PRKCD/SMAD1/SRF/RICTOR/PPP2R2A/YWHAQ/BRK1/RAF1/MAP2K4/CREB1/RPS6KA3/CHN2/ZFP36/SOS1/MAP2K2/ARPC3/PPP2R1A/SRC/GRB2/KSR1/NRAS/MAP2K1/RIN1/PIK3CD/ARPC4/STAT3/CDC42/PDPK1/MAP3K2/ACTR3/MAPK7/PPP2CA/ARPC1B/ARPC5/ARPC2/BRAF/WASF2/YWHAB/KRAS/CYFIP2/DUSP1/ACTR2/IQGAP1/YWHAZ/MAPK1/MAP3K1/DUSP6/CAPN2
kidney	PLATELET HOMEOSTASIS	-1.53103	0.0350251	ATP2B4/STIM1/ATP2A2/P2RX7/PTPN11/SRI/PPP2R1A/PTGIR/PPP2R5E/PPP2CA/MAPK14/GNG10/PPP2R5C/GNB2/PPP2R5A/GNB1/P2RX1/PTPN6/GNG2/ATP2B1/PECAM1/FGR
kidney	PHOSPHATIDYLINOSITOL SIGNALING SYSTEM	-1.53189	0.0423491	PIK3CA/CALM1/PIK3CB/INPP5K/SYNJ1/PIKFYVE/ITPKB/INPP5A/INPP1/DGKZ/ITPK1/PIK3CG/DGKD/IMPA2/CALM2/PIK3C3/PIK3CD/PLCB1/PLCB2/PIP4K2A/INPP4A/PTEN/PRKCB
kidney	MYD88 INDEPENDENT TLR4 CASCADE	-1.5321	0.0293216	RELA/UBC/TAB3/RPS6KA1/DUSP3/TAB2/PPP2R1B/BIRC2/FOS/CHUK/TBK1/DUSP7/TRAF3/UBE2D2/TICAM1/CASP8/IKBKE/MAP2K4/CREB1/RPS6KA3/PTPN11/SKP1/MAP3K8/PPP2R1A/NOD2/MAP2K1/NFKB2/NFKB1/UBE2V1/UBE2D1/MAPK7/PPP2CA/MAPKAPK2/MAPK14/UBE2D3/TLR4/IRF7/TANK/MAPKAPK3/NFKBIA/MAPK1/MAP2K3/DUSP6/RIPK2/BIRC3/S100A12
kidney	ADHERENS JUNCTION	-1.53258	0.041635	SRC/SMAD3/CDC42/CTNNA1/CTNNB1/RHOA/PTPRJ/SMAD2/CREBBP/ACTN4/WAS/WASF2/IQGAP1/PTPN6/MAPK1/EP300/VCL/FYN/RAC2/TCF7L2
kidney	INOSITOL PHOSPHATE METABOLISM	-1.53354	0.0423491	PIK3CA/TPI1/PIK3CB/INPP5K/SYNJ1/PIKFYVE/ITPKB/INPP5A/INPP1/ITPK1/PIK3CG/IMPA2/PIK3C3/PIK3CD/PLCB1/PLCB2/PIP4K2A/INPP4A/IPMK/PTEN
kidney	MRNA SPLICING	-1.53391	0.00771055	NCBP1/GTF2F1/SRRM1/TXNL4A/SF3B6/HNRNPUL1/SF3B2/RBMX/POLR2E/POLR2D/MTREX/CCAR1/DDX23/SRSF2/SF3B4/RBM17/LSM3/PRPF3/PUF60/RNPC3/SUGP1/SMNDC1/PRPF4/HNRNPH1/NCBP2/SRRT/CASC3/CWC22/PRPF6/GPKOW/PABPN1/SNRPG/PRPF8/MAGOH/SF3B5/DDX42/SRSF10/DHX38/SNRPD3/PRCC/HSPA8/DNAJC8/HNRNPL/EFTUD2/ALYREF/SRSF1/YBX1/BCAS2/SART1/SYF2/SYMPK/SF3B3/NUDT21/POLR2B/BUD31/HNRNPA1/HNRNPC/HNRNPR/WBP11/SRSF11/RBM8A/SNU13/SNRPB/SRS…
kidney	SIGNALING BY NOTCH4	-1.53468	0.0324736	AKT1/PSMC6/PSMC1/NOTCH1/PSME3/RBX1/PSMD7/KAT2B/PSMA5/PSMB4/NOTCH4/PSMD1/APH1B/PSMD13/SKP1/PSME2/PSMA7/PSMD9/PSME1/SMAD3/SNW1/PSMB8/PSMA2/PSMB10/PSMA6/CREBBP/PSMB9/FBXW7/HES1/PSMA4/PSEN1/ADAM10/YWHAZ/NOTCH2/EP300
kidney	DEUBIQUITINATION	-1.53729	0.00228981	PSMC6/HCFC1/PSME4/PSMC1/BIRC2/ACTB/INO80C/PSME3/TADA3/SMAD1/MAT2B/USP24/TRAF3/TAF10/INO80/OGT/VCPIP1/USP9X/PSMD7/KAT2B/USP37/PSMA5/PSMB4/OTUD5/USP33/RAD23A/MDM4/PSMD1/PSMD13/TRRAP/TNKS2/IFIH1/TNIP1/TP53/ASXL2/RAD23B/PSME2/FKBP8/PSMA7/DDX58/PSMD9/PSME1/USP48/ATXN3/ATXN7/RHOT1/SMAD3/NOD2/ARRB1/USP47/USP34/USP25/BECN1/MDM2/PSMB8/FOXK1/SIAH2/UBE2D1/PSMA2/TNFAIP3/TGFB1/PSMB10/RHOA/APC/PSMA6/SMAD2/PSMB…
kidney	RAB REGULATION OF TRAFFICKING	-1.53732	0.0182102	GDI1/TBC1D24/ANKRD27/SBF1/RIC1/TBC1D2/GGA3/TBC1D14/RAB14/RAB6A/RAB5A/RAB5C/CCZ1B/AKT1/RIN2/RAB18/RAB3GAP1/TRAPPC1/AKT2/RAB1A/CHML/RABGAP1/TRAPPC11/RAB7A/TRAPPC8/ULK1/TBC1D10A/HPS1/DENND3/RAB8A/RAB1B/RAB31/GABARAP/DENND6A/SBF2/DENND4A/MON1B/RIN1/RAB3GAP2/GAPVD1/GDI2/TBC1D15/MAP1LC3B/TRAPPC10/DENND1A/DENND5A/CCZ1/DENND4B/TBC1D10C/RAB8B/RIN3/RAB21/RAB10/RABGEF1/RAB27A/TRAPPC5/SYTL1
kidney	INSULIN SIGNALING PATHWAY	-1.538	0.0182102	RAPGEF1/PHKA2/EIF4EBP1/SHC1/PIK3CA/CALM1/PIK3CB/AKT1/INPP5K/ARAF/AKT2/RPS6KB1/RAF1/PPP1R3B/HK2/MKNK1/PTPN1/EXOC7/PRKX/SOS1/PRKAR2A/MAP2K2/PIK3CG/PHKB/GSK3B/PPP1CC/GRB2/FOXO1/NRAS/MKNK2/MAP2K1/CALM2/PRKAG2/SH2B2/PIK3CD/SOS2/FLOT2/PDPK1/RPS6KB2/PYGL/HK1/RHOQ/CBL/PRKAR1A/PRKACA/CRK/EIF4E2/BRAF/PPP1CA/IRS2/HK3/PPP1CB/KRAS/MAPK1/SOCS3
kidney	IL2 1PATHWAY	-1.53944	0.0455291	SHC1/PIK3CA/PRKCE/FOS/JAK3/RAF1/STAT5B/PTPN11/SOS1/MAP2K2/GRB2/NRAS/MAP2K1/STAT3/SYK/RHOA/MAPKAPK2/MAPK14/IRS2/JAK1/KRAS/PTK2B/DOK2/MAPK1/SOCS3/FYN/PRKCB
kidney	PROCESSING OF CAPPED INTRON CONTAINING PRE MRNA	-1.54129	0.00193043	NUP93/SEH1L/NCBP1/GTF2F1/SRRM1/TXNL4A/NUP155/SF3B6/HNRNPUL1/SF3B2/RBMX/POLR2E/POLR2D/MTREX/CCAR1/DDX23/SRSF2/SF3B4/NUP88/RBM17/LSM3/NUP133/PRPF3/PUF60/RNPC3/THOC5/SUGP1/SMNDC1/PRPF4/HNRNPH1/NCBP2/SRRT/CASC3/CWC22/NUP153/FYTTD1/PRPF6/POM121C/POLDIP3/GPKOW/NUP62/PABPN1/SNRPG/PRPF8/MAGOH/SF3B5/DDX42/SRSF10/NXF1/DHX38/SNRPD3/PRCC/HSPA8/DNAJC8/HNRNPL/EFTUD2/ALYREF/SRSF1/YBX1/NUP98/BCAS2/SART1/SYF2/SYM…
kidney	P75 NTR RECEPTOR MEDIATED SIGNALLING	-1.54669	0.0232609	UBA52/IRAK1/PLEKHG5/TRIO/VAV3/RELA/UBC/VAV2/ADAM17/TIAM2/ARHGEF6/ARHGEF3/APH1B/CASP3/SOS1/ITSN1/HDAC1/AATF/VAV1/GNA13/ARHGEF2/RTN4/TIAM1/FGD2/FGD3/ARHGEF18/SOS2/NFKB1/ARHGEF1/FGD4/RHOA/ARHGDIA/BCL2L11/AKAP13/PSEN1/NFKBIA/RIPK2/MYD88
kidney	NOD LIKE RECEPTOR SIGNALING PATHWAY	-1.54888	0.0324757	RELA/CXCL1/TAB3/TAB2/CARD9/BIRC2/CHUK/SUGT1/CARD8/CASP8/CARD6/TNF/CASP5/NOD2/CCL8/PYCARD/NFKB1/HSP90AA1/TNFAIP3/XIAP/NLRC4/MAPK14/NLRP3/PSTPIP1/NLRP1/CXCL8/NFKBIA/MEFV/CXCL2/MAPK1/ERBIN/RIPK2/BIRC3/IL1B/CASP1
kidney	TCF DEPENDENT SIGNALING IN RESPONSE TO WNT	-1.55039	0.0110852	UBC/PSMB3/CHD8/FRAT1/CSNK2A1/RBBP5/AKT1/PPP2R1B/SMARCA4/PSMC6/PSME4/PSMC1/PSME3/RBX1/AKT2/PSMD7/PSMA5/PSMB4/CTBP1/PSMD1/PSMD13/TRRAP/TNKS2/KMT2D/HDAC1/CSNK1G2/PPP2R1A/PSME2/GSK3B/PSMA7/PSMD9/PSME1/PPP2R5E/TLE3/USP34/CDC73/PSMB8/CTNNB1/FRAT2/CSNK1A1/PSMA2/XIAP/PPP2CA/PSMB10/APC/PSMA6/CREBBP/PSMB9/CUL3/RUNX3/PPP2R5C/USP8/PSMA4/PPP2R5A/YWHAZ/CCDC88C/EP300/TLE4/TCF7L2
kidney	INTEGRATION OF ENERGY METABOLISM	-1.55669	0.0285147	PPP2R1B/ADIPOR1/ADIPOR2/MLX/STK11/ACLY/CYSLTR2/PRKAR2A/VAMP2/PPP2R1A/AHCYL1/PRKAG2/RAP1A/GNAQ/PLCB1/PLCB2/PPP2CA/TALDO1/ACSL4/PRKAR1A/ADCY7/PRKACA/GNG10/GNAI2/GNB2/GNB1/IQGAP1/TKT/GNG2/CD36
kidney	CMYB PATHWAY	-1.55701	0.0337305	PPP3CA/TOM1/ANPEP/CBX4/NRAS/SLC25A3/HIPK2/LYZ/CREBBP/SPI1/ADA/SP1/HES1/NCOR1/ETS2/CDKN1A/COPA/KRAS/CDKN1B/IQGAP1/MAT2A/EP300/PTGS2/BIRC3/CEBPB/ATP2B1
kidney	RHO GTPASES ACTIVATE WASPS AND WAVES	-1.55751	0.0473649	ACTB/WIPF2/BRK1/ACTG1/ARPC3/GRB2/BTK/ARPC4/CDC42/ARPC1A/ACTR3/ARPC1B/WIPF1/ARPC5/NCKAP1L/ARPC2/WAS/WASF2/CYFIP2/ACTR2/MAPK1
kidney	EPHB FWD PATHWAY	-1.55751	0.0423491	ITSN1/SRC/GRB2/NRAS/TF/MAP2K1/RAP1A/CDC42/PXN/CRK/ROCK1/KRAS/RRAS/MAP4K4/MAPK1/RAP1B
kidney	INTERLEUKIN 1 FAMILY SIGNALING	-1.55863	0.013379	PSMD12/PSMB2/UBA52/IRAK1/PTPN4/PTPN13/RELA/UBC/PSMB3/TAB3/PTPN2/TAB2/PSMC6/PSME4/PSMC1/CHUK/TBK1/PSME3/PTPN9/IL1R2/RBX1/PTPN18/PSMD7/PSMA5/PSMB4/PELI3/MAP2K4/PSMD1/PSMD13/PTPN11/SKP1/MAP3K8/SIGIRR/PSME2/PSMA7/PTPN12/PSMD9/PSME1/TOLLIP/SMAD3/NOD2/MAP2K1/STAT3/NFKB2/NFKB1/PSMB8/UBE2V1/PELI1/IL1RN/PSMA2/PSMB10/GSDMD/PSMA6/PSMB9/PELI2/PSMA4/NFKBIA/PTPN6/MAP3K3/RIPK2/MYD88/IL1B/CASP1/IRAK3/S100A12
kidney	CLATHRIN MEDIATED ENDOCYTOSIS	-1.55985	0.00934041	NECAP2/EPS15L1/AP2S1/UBA52/EPN1/NEDD8/COPS2/STAM2/COPS7B/UBC/VAMP3/RAB5A/SCARB2/VAMP7/RAB5C/HIP1/HSPA8/ACTB/GAK/SYNJ1/ARFGAP1/M6PR/ACTG1/PACSIN2/COPS5/UBQLN2/TOR1B/NECAP1/ITSN1/VAMP2/ARPC3/GRB2/PICALM/CLTB/LDLR/TF/ARRB1/REPS1/EPS15/SH3KBP1/ITSN2/ARPC4/FNBP1/GAPVD1/CLTC/ARPC1A/ACTR3/UBQLN1/TGOLN2/CBL/IGF2R/ARPC5/ARPC2/SNX18/ARRB2/AGFG1/AP2A1/GRK2/GRK3/ACTR2/TFRC/HBEGF/AREG/EREG
kidney	SPLICEOSOME	-1.56426	0.00825033	SNRPE/TRA2A/NCBP1/TXNL4A/SF3B6/SF3B2/RBMX/DDX23/SRSF2/SF3B4/RBM17/LSM3/PRPF3/PUF60/SMNDC1/DHX8/PRPF4/NCBP2/PRPF6/ACIN1/SNRPG/PRPF8/MAGOH/SF3B5/DDX42/SRSF10/DHX38/SNRPD3/HSPA8/EFTUD2/ALYREF/SRSF1/BCAS2/SART1/SYF2/SF3B3/BUD31/CCDC12/HNRNPA1/HNRNPC/TCERG1/WBP11/RBM8A/SNU13/SNRPB/SRSF4/SRSF3/HNRNPA1L2/U2SURP/DDX46/SF3A1/SRSF6/SLU7/HSPA1B/THOC2/AQR/ZMAT2/RBM25/DHX15/LSM8/DDX39B/PRPF38A/SNW1/HNRNPM/CDC…
kidney	TOLL LIKE RECEPTOR CASCADES	-1.56692	0.00934041	RELA/UBC/SFTPD/TAB3/RPS6KA1/DUSP3/TAB2/PPP2R1B/EEA1/ITGB2/BIRC2/FOS/CHUK/TBK1/DUSP7/UNC93B1/TRAF3/UBE2D2/TICAM1/CASP8/PELI3/IKBKE/MAP2K4/CREB1/RPS6KA3/PTPN11/SKP1/MAP3K8/SIGIRR/ITGAM/PPP2R1A/TLR2/NOD2/MAP2K1/BTK/PIK3C3/NFKB2/NFKB1/UBE2V1/PELI1/UBE2D1/MAPK7/PPP2CA/GSDMD/MAPKAPK2/TLR8/MAPK14/PELI2/UBE2D3/TLR4/IRF7/TANK/MAPKAPK3/NFKBIA/MAPK1/MAP2K3/MAP3K1/CTSS/DUSP6/RIPK2/BIRC3/MYD88/IRAK3/CD36/S100…
kidney	CLEC7A DECTIN 1 SIGNALING	-1.56753	0.0110852	PSMD12/PSMB2/UBA52/PPP3CB/RELA/UBC/PSMB3/TAB3/CALM1/TAB2/CARD9/PSMC6/RELB/PSME4/PSMC1/BCL10/CHUK/PRKCD/PSME3/UBE2D2/CASP8/PSMD7/PSMA5/PSMB4/CLEC7A/PSMD1/UBA3/PSMD13/SKP1/PPP3R1/PPP3CA/PSME2/SRC/PSMA7/PSMD9/PSME1/AHCYL1/PYCARD/PDPK1/SYK/NFKB2/NFKB1/PSMB8/UBE2V1/UBE2D1/NFATC1/PSMA2/PSMB10/PSMA6/PSMB9/NFATC3/PSMA4/NFKBIA/MALT1/IL1B
kidney	SYNTHESIS OF ACTIVE UBIQUITIN ROLES OF E1 AND E2 ENZYMES	-1.5689	0.0447338	UBE2G2/UBA52/UBC/UBA6/UBE2D2/USP9X/UBE2A/UBA1/UBE2K/UBE2Z/UBE2H/UBE2E3/UBE2S/UBE2D1/UBE2B/USP7/UBE2R2
kidney	REGULATION OF INSULIN SECRETION	-1.56992	0.0293299	PRKAR2A/VAMP2/AHCYL1/RAP1A/GNAQ/PLCB1/PLCB2/ACSL4/PRKAR1A/PRKACA/GNG10/GNAI2/GNB2/GNB1/IQGAP1/GNG2/CD36
kidney	VEGF SIGNALING PATHWAY	-1.57257	0.0243898	PPP3CB/PIK3CA/NFAT5/PIK3CB/AKT1/AKT2/RAF1/VEGFA/PPP3R1/CASP9/PPP3CA/MAP2K2/PIK3CG/SRC/NRAS/MAP2K1/PIK3CD/CDC42/PXN/NFATC1/CHP1/MAPKAPK2/MAPK14/NFATC3/KRAS/MAPKAPK3/MAPK1/PTGS2/RAC2/PRKCB
kidney	OPIOID SIGNALLING	-1.57408	0.0368839	PDE4A/CREB1/PPP3R1/PRKX/PRKAR2A/PPP3CA/PPP2R1A/AHCYL1/GNAQ/PLCB1/PLCB2/PDE4D/PPP2CA/PRKAR1A/ADCY7/PRKACA/GNG10/GNAI2/PPP1CA/GRK2/GNB2/GNB1/CAMKK2/GNAI3/PDE4B/MAPK1/GNG2
kidney	UBIQUITIN MEDIATED PROTEOLYSIS	-1.57437	0.0073478	UBE2G2/DDB1/UBA2/UBE2I/UBE3B/CUL4B/UBA6/PIAS4/UBE2J2/HERC1/UBE2F/BIRC2/KLHL9/CDC26/ANAPC5/HUWE1/CUL5/UBE2D2/RBX1/HERC3/UBE2Q1/PIAS1/UBE2A/UBA3/VHL/MGRN1/WWP1/SKP1/UBE4A/UBA1/ELOB/COP1/WWP2/UBE2K/ITCH/UBR5/RNF7/UBE2L6/UBE2Z/UBE2H/UBE2E3/UBE2S/CUL4A/MDM2/UBE2D1/UBE3A/XIAP/UBE2B/CBL/CUL3/FBXW7/UBE2D3/BIRC6/TRIP12/UBE2J1/MAP3K1/UBE2R2/BIRC3/SOCS3
kidney	NFKAPPAB CANONICAL PATHWAY	-1.57835	0.0474421	BIRC2/BCL10/CHUK/ATM/TNF/NOD2/NFKB1/TNFAIP3/CYLD/UBE2D3/NFKBIA/MALT1/RIPK2
kidney	OVARIAN TUMOR DOMAIN PROTEASES	-1.57933	0.0337305	OTUB1/UBA52/UBC/MAVS/ZRANB1/TRAF3/VCPIP1/OTUD5/IFIH1/TNIP1/TP53/DDX58/NOD2/UBE2D1/TNFAIP3/RHOA/APC/TRIM25/PTEN/RIPK2
kidney	AR TF PATHWAY	-1.58012	0.0410484	KAT2B/APPBP2/SMARCE1/NR3C1/MAP2K4/HDAC1/GSK3B/SRC/FOXO1/NCOA2/SMARCC1/MDM2/HSP90AA1/CREBBP/MAPK14/DNAJA1/NCOA1/REL/PKN1/EP300/RXRA
kidney	FLT3 SIGNALING	-1.58048	0.0337305	STAT5B/PTPN11/SOS1/GRB2/NRAS/SYK/PTPRJ/CBL/BCL2L11/KRAS/FOXO3/CDKN1B/CSK/SH2B3/HCK/SLA/FYN
kidney	S1P S1P4 PATHWAY	-1.58145	0.0474122	GNA13/CDC42/RHOA/GNAI2/GNAI3/MAPK1/S1PR4
kidney	INTERLEUKIN 6 SIGNALING	-1.58305	0.0473649	TYK2/PTPN11/STAT3/CBL/JAK1/JAK2/IL6R/SOCS3
kidney	BIOCARTA MONOCYTE PATHWAY	-1.5854	0.0455291	ITGAM/ICAM1/SELL/CD44/ITGA4/ITGAL/PECAM1
kidney	TRANSCRIPTIONAL REGULATION BY RUNX1	-1.58614	0.00551908	SMARCC2/PSMD6/CBFB/YAF2/MOV10/KMT2B/PHC1/PSMD4/SIN3A/PSMD12/PSMB2/UBA52/LGALS3/DPY30/CSNK2B/UBC/PHC3/PSMB3/SMARCA2/SETD1B/CSNK2A1/TNRC6A/RBBP5/SMARCA4/PSMC6/PSME4/PSMC1/AGO3/KMT2A/PSME3/SIN3B/PSMD7/KAT2B/PSMA5/PSMB4/SMARCD2/SMARCE1/PSMD1/PSMD13/PTPN11/AGO1/KMT2D/HDAC1/ITCH/PSME2/SRC/PSMA7/ARID1B/CBX6/PSMD9/PSME1/CBX4/CCNH/SMARCD3/TNRC6B/NFE2/SMARCC1/KMT2E/HIPK2/PSMB8/CR1/PSMA2/AGO4/PSMB10/PSMA6/C…
kidney	PARASITE INFECTION	-1.58707	0.0223287	VAV1/ARPC3/FCGR3A/SRC/GRB2/BTK/ARPC4/CDC42/MYO9B/SYK/ARPC1A/ACTR3/ARPC1B/WIPF1/ARPC5/NCKAP1L/ARPC2/CRK/WAS/WASF2/MYH9/CYFIP2/ACTR2/MAPK1/HCK/FYN/LYN/FGR
kidney	SHC1 EVENTS IN ERBB4 SIGNALING	-1.5892	0.0445024	SOS1/GRB2/NRAS/KRAS/NRG1/HBEGF/EREG
kidney	SIGNALLING TO ERKS	-1.59023	0.0423491	RIT1/SOS1/MAP2K2/SRC/GRB2/NRAS/MAP2K1/RAP1A/KIDINS220/MAPKAPK2/MAPK14/CRK/BRAF/RALB/YWHAB/KRAS/MAPKAPK3/MAPK1
kidney	INTERLEUKIN 12 FAMILY SIGNALING	-1.59119	0.0324757	VAMP7/HNRNPDL/SOD1/ANXA2/LMNB1/TYK2/PITPNA/IL27RA/ARF1/TCP1/IL10/CNN2/PSME2/HNRNPF/PDCD4/BOLA2B/STAT3/CDC42/PAK2/HSPA9/TALDO1/HNRNPA2B1/CAPZA1/BOLA2/JAK1/JAK2/MSN/RAP1B/LCP1/SOD2
kidney	CHEMOKINE SIGNALING PATHWAY	-1.59119	0.00553421	PRKX/SOS1/NCF1/VAV1/PIK3CG/GSK3B/GRB2/TIAM1/NRAS/ARRB1/CCL8/MAP2K1/PIK3CD/RAP1A/SOS2/STAT3/CDC42/PXN/PLCB1/PLCB2/NFKB1/CCR1/RHOA/ADCY7/PRKACA/CXCL3/CRK/GNG10/GNAI2/BRAF/WAS/ROCK1/ARRB2/GRK2/GNB2/STAT2/DOCK2/JAK2/GNB1/KRAS/PTK2B/CXCL8/FOXO3/NFKBIA/GRK3/CSK/GNAI3/CXCL2/MAPK1/GRK6/HCK/RAP1B/RASGRP2/GNG2/RAC2/LYN/PRKCB/FGR
kidney	INTRACELLULAR SIGNALING BY SECOND MESSENGERS	-1.5955	0.00029885	UBC/PHC3/RBBP7/PSMB3/PIK3CA/CALM1/PRKCE/SNAI1/PIK3CB/CSNK2A1/TNRC6A/PDE1B/AKT1/PPP2R1B/PSMC6/PSME4/PSMC1/AGO3/CHUK/PRKCD/PSME3/AKT2/GATAD2A/RICTOR/PSMD7/SUZ12/PSMA5/PSMB4/GSK3A/CREB1/PSMD1/PSMD13/PTPN11/TNKS2/AGO1/CASP9/RRAGC/PRKX/TP53/RHOG/PRKAR2A/HDAC1/VAV1/TRIB3/WWP2/PPP2R1A/PSME2/GSK3B/SRC/PSMA7/GRB2/CBX6/PSMD9/LAMTOR4/PSME1/PPP2R5E/CBX4/FOXO1/AHCYL1/TNRC6B/PIK3CD/PDPK1/MDM2/PSMB8/LAMTOR5/RPS…
kidney	LIS1 PATHWAY	-1.59744	0.0499231	PAFAH1B1/CDC42/PAFAH1B2/RHOA/CLIP1/DYNC1H1/DYNLT1/IQGAP1/NDEL1
kidney	G ALPHA 12 13 SIGNALLING EVENTS	-1.60004	0.0200018	ROCK2/TIAM2/ARHGEF6/ARHGEF3/SOS1/ITSN1/VAV1/GNA13/ARHGEF2/TIAM1/FGD2/FGD3/BTK/ARHGEF18/SOS2/ARHGEF1/FGD4/RHOA/GNG10/ROCK1/GNB2/RHOC/AKAP13/GNB1/RHOB/GNG2
kidney	ERBB SIGNALING PATHWAY	-1.60177	0.0235587	SHC1/PIK3CA/PAK1/PIK3CB/AKT1/ARAF/AKT2/RPS6KB1/RAF1/MAP2K4/STAT5B/SOS1/MAP2K2/PIK3CG/GSK3B/SRC/GRB2/NRAS/MAP2K1/PIK3CD/SOS2/PAK2/RPS6KB2/CBL/CRK/BRAF/CDKN1A/KRAS/NRG1/CDKN1B/MAPK1/HBEGF/PRKCB/AREG/EREG
kidney	BIOCARTA GH PATHWAY	-1.6025	0.049064	SHC1/PIK3CA/RPS6KA1/SRF/RAF1/STAT5B/SOS1/PIK3CG/GRB2/MAP2K1/JAK2/PTPN6/MAPK1/PRKCB
kidney	CD209 DC SIGN SIGNALING	-1.60309	0.0454735	NRAS/NFKB1/PAK2/CREBBP/PRKACA/KRAS/ICAM2/EP300/FYN/LYN/ICAM3
kidney	IFNG PATHWAY	-1.60556	0.0243898	RAPGEF1/PIAS4/PIK3CA/PTPN2/AKT1/PRKCD/PIAS1/PTPN11/DAPK1/MAP2K1/RAP1A/STAT3/IRF9/CBL/CREBBP/MAP3K11/IRF1/JAK1/JAK2/MAPK1/EP300/MAP3K1/RAP1B/CEBPB/IL1B/CASP1
kidney	BIOCARTA TNFR2 PATHWAY	-1.60565	0.049064	NFKB1/TNFAIP3/TANK/DUSP1/NFKBIA/MAP3K1/TNFRSF1B
kidney	THYROID CANCER	-1.60772	0.0453289	TP53/MAP2K2/NCOA4/NRAS/MAP2K1/CTNNB1/TPR/BRAF/KRAS/TPM3/MAPK1/TCF7L2/RXRA
kidney	NOTCH PATHWAY	-1.60847	0.0173257	NOTCH4/CTBP1/MARK2/APH1B/SKP1/HDAC1/ITCH/EPS15/MYCBP/SPEN/CBL/FBXW7/RBBP8/NCOR1/YY1/CDKN1A/PSEN1/ADAM10/NUMB/NEURL1/NOTCH2/EP300
kidney	SHC1 EVENTS IN ERBB2 SIGNALING	-1.60854	0.0423491	SHC1/PRKCE/PRKCD/SOS1/GRB2/PTPN12/NRAS/KRAS/NRG1/HBEGF/EREG
kidney	CDC42 PATHWAY	-1.60888	0.013379	PAK4/HRAS/TNK2/MAP2K7/CFL1/PIK3CA/PRKCE/PAK1/VAV2/LIMK2/RPS6KB1/RAF1/ARHGEF6/MAP2K4/EXOC7/ARPC3/GSK3B/SRC/TIAM1/ARPC4/CDC42/CTNNA1/PAK2/CTNNB1/ACTR3/ARPC1B/APC/ARHGDIA/CBL/MAPK14/MAP3K11/ARPC5/ARPC2/BRAF/ACTR2/IQGAP1/MAPK1/MAP2K3/MAP3K1
kidney	PDGFRB PATHWAY	-1.61084	0.00588387	SRF/YWHAQ/BRK1/RAF1/MAP2K4/RPS6KA3/PTPN1/STAT5B/PTPN11/SOS1/MAP2K2/ARPC3/PPP2R1A/PIK3CG/SRC/GRB2/KSR1/NRAS/MAP2K1/EIF2AK2/PIK3CD/RAP1A/ARPC4/STAT3/ARAP1/TAGLN/ACTR3/PPP2CA/RHOA/ARPC1B/PTPRJ/ARHGDIA/CBL/ACTN4/ARPC5/ARPC2/CRK/BRAF/WASF2/YWHAB/JAK2/KRAS/CYFIP2/ACTR2/IQGAP1/CSK/SLC9A3R1/YWHAZ/MAPK1/PTEN/HCK/PAG1/SLA/RAP1B/JUND/FYN/LYN/FGR
kidney	BIOCARTA EGFR SMRTE PATHWAY	-1.61292	0.0350251	MAP2K1/MAPK14/MAP3K1/RARA/RXRA
kidney	BIOCARTA BARRESTIN SRC PATHWAY	-1.61354	0.0444578	RAF1/MAP2K2/ARRB1/MAP2K1/PLCB1/GRK2/MAPK1/HCK/FGR
kidney	THROMBIN PAR4 PATHWAY	-1.61393	0.0423491	ROCK2/GNA13/GNAQ/PLCB2/RHOA/ROCK1/GNB1/GNG2
kidney	CONSTITUTIVE SIGNALING BY ABERRANT PI3K IN CANCER	-1.61648	0.0169242	PTPN11/RHOG/VAV1/SRC/GRB2/PIK3CD/IRS2/NRG1/PIK3AP1/FYN/HBEGF/RAC2/AREG/EREG
kidney	ENDOCYTOSIS	-1.61742	0.001895	AP2S1/EPN1/SMAP1/STAM2/PSD4/ARAP3/HLA-C/RAB5A/HLA-B/RAB11FIP2/RAB5C/EEA1/HSPA8/PIKFYVE/SNF8/ARFGAP1/CHMP3/VPS36/HLA-E/RAB11FIP4/CHMP4B/CHMP2A/VTA1/WWP1/FLT1/ACAP3/VPS4B/HLA-F/DNM1L/ITCH/RAB31/TSG101/SRC/CLTB/LDLR/VPS37B/HSPA1B/SH3GLB1/ARRB1/EPS15/SH3KBP1/RUFY1/CDC42/ARAP1/VPS37C/MDM2/CLTC/CHMP2B/ARFGAP2/HSPA1A/PDCD6IP/CHMP1B/CBL/ARFGAP3/USP8/ARRB2/AP2A1/GRK2/ASAP1/GRK3/RAB11FIP1/ACAP2/SMAP2/ARAP2…
kidney	T CELL RECEPTOR SIGNALING PATHWAY	-1.61815	0.00771055	PPP3CB/VAV3/RELA/PIK3CA/PAK1/NFAT5/PIK3CB/VAV2/AKT1/BCL10/FOS/CHUK/AKT2/RAF1/TNF/PPP3R1/SOS1/IL10/MAP3K8/PPP3CA/MAP2K2/VAV1/PIK3CG/GSK3B/GRB2/NRAS/MAP2K1/PIK3CD/SOS2/CDC42/PDPK1/NFKB1/PAK2/NFATC1/RHOA/CHP1/CBL/LCP2/MAPK14/NFATC3/KRAS/NFKBIA/PTPN6/MAPK1/MALT1/PTPRC/FYN
kidney	BIOCARTA IL10 PATHWAY	-1.61971	0.0472512	TNF/BLVRB/IL10/STAT3/IL10RA/IL10RB/BLVRA/JAK1
kidney	GROWTH HORMONE RECEPTOR SIGNALING	-1.61996	0.0373862	PTPN1/STAT5B/STAT3/IRS2/JAK2/PTPN6/MAPK1/SOCS3/LYN
kidney	INTERLEUKIN 1 SIGNALING	-1.62129	0.00645282	PSMD12/PSMB2/UBA52/IRAK1/RELA/UBC/PSMB3/TAB3/TAB2/PSMC6/PSME4/PSMC1/CHUK/PSME3/IL1R2/RBX1/PSMD7/PSMA5/PSMB4/PELI3/MAP2K4/PSMD1/PSMD13/SKP1/MAP3K8/PSME2/PSMA7/PSMD9/PSME1/TOLLIP/NOD2/MAP2K1/NFKB2/NFKB1/PSMB8/UBE2V1/PELI1/IL1RN/PSMA2/PSMB10/PSMA6/PSMB9/PELI2/PSMA4/NFKBIA/MAP3K3/RIPK2/MYD88/IL1B/IRAK3/S100A12
kidney	ENDOMETRIAL CANCER	-1.62449	0.029199	PIK3CA/PIK3CB/AKT1/ARAF/AKT2/RAF1/CASP9/SOS1/TP53/MAP2K2/PIK3CG/GSK3B/GRB2/NRAS/MAP2K1/PIK3CD/SOS2/CTNNA1/PDPK1/CTNNB1/APC/BRAF/KRAS/FOXO3/MAPK1/PTEN/TCF7L2
kidney	DEGRADATION OF BETA CATENIN BY THE DESTRUCTION COMPLEX	-1.6278	0.00771055	PSMD12/PSMB2/UBA52/UBC/PSMB3/FRAT1/ZRANB1/PPP2R1B/PSMC6/PSME4/PSMC1/PSME3/RBX1/PSMD7/PSMA5/PSMB4/CTBP1/PSMD1/PSMD13/SKP1/HDAC1/PPP2R1A/PSME2/GSK3B/PSMA7/PSMD9/PSME1/PPP2R5E/TLE3/PSMB8/CTNNB1/FRAT2/CSNK1A1/PSMA2/PPP2CA/PSMB10/APC/PSMA6/PSMB9/CTBP2/PPP2R5C/PSMA4/PPP2R5A/TLE4/TCF7L2
kidney	NEUROTROPHIN SIGNALING PATHWAY	-1.62847	0.00553421	SHC1/PIK3CA/CALM1/RPS6KA1/PIK3CB/AKT1/PRKCD/AKT2/YWHAQ/RAF1/RPS6KA3/MAP3K5/BAX/PTPN11/SORT1/ARHGDIB/SOS1/TP53/MAP2K2/PIK3CG/GSK3B/GRB2/NRAS/MAP2K1/CALM2/SH2B2/PIK3CD/RAP1A/SOS2/CDC42/KIDINS220/PDPK1/NFKB1/MAPK7/RHOA/ATF4/ARHGDIA/MAPKAPK2/MAPK14/CRK/BRAF/IRS2/YWHAB/KRAS/PSEN1/FOXO3/NFKBIA/CSK/YWHAZ/SH2B3/MAPK1/MAP3K3/MAP3K1/RIPK2/RAP1B/IRAK3
kidney	ALPHA SYNUCLEIN PATHWAY	-1.62848	0.0423491	SRC/SYK/PLCB2/PTK2B/FKBP1A/MAPK1/HCK/FYN/LYN/FGR
kidney	GPVI MEDIATED ACTIVATION CASCADE	-1.62987	0.0217068	VAV3/PIK3CA/PIK3CB/VAV2/PTPN11/RHOG/VAV1/PIK3CG/FCER1G/CDC42/PDPK1/SYK/RHOA/LCP2/PTPN6/RHOB/FYN/RAC2/LYN
kidney	LONG TERM DEPRESSION	-1.63082	0.0198745	MAP2K2/PPP2R1A/GNA13/NRAS/MAP2K1/GNAQ/PLCB1/PLCB2/PPP2CA/PPP1R17/GNAI2/BRAF/KRAS/GNAI3/MAPK1/LYN/PRKCB
kidney	SIGNALING BY KIT IN DISEASE	-1.63111	0.045594	STAT5B/SOS1/SRC/GRB2/NRAS/STAT3/JAK2/KRAS/FYN/LYN
kidney	HEDGEHOG GLI PATHWAY	-1.63211	0.0251102	SIN3A/IFT88/LGALS3/SAP18/RBBP7/CSNK1D/SPOP/AKT1/CSNK1G3/PRKCD/SIN3B/CSNK1G1/PIAS1/HDAC1/CSNK1G2/GSK3B/MAP2K1/CSNK1A1/CREBBP/PRKACA/GNAI2/ARRB2/GNB1/GNAI3/GNG2/MTSS1
kidney	BETA CATENIN PHOSPHORYLATION CASCADE	-1.63226	0.035635	FRAT1/PPP2R1B/PPP2R1A/GSK3B/PPP2R5E/CTNNB1/FRAT2/CSNK1A1/PPP2CA/APC/PPP2R5C/PPP2R5A
kidney	CONSTITUTIVE SIGNALING BY AKT1 E17K IN CANCER	-1.6327	0.0338427	AKT1/CHUK/AKT2/RICTOR/GSK3A/CREB1/CASP9/GSK3B/FOXO1/PDPK1/MDM2/RPS6KB2/CDKN1A/FOXO3/CDKN1B/NR4A1
kidney	GOLGI ASSOCIATED VESICLE BIOGENESIS	-1.6336	0.0169254	VAMP7/GOLGB1/RAB5C/HSPA8/GAK/NAPA/BLOC1S6/FTH1/ARF1/YIPF6/SORT1/AP3S1/NECAP1/VAMP2/SNX5/CLINT1/PICALM/AP3B1/AP1G1/SNX2/ARRB1/AP1M1/PUM1/BLOC1S1/CLTC/TGOLN2/IGF2R/CPD/TFRC/AP1S2
kidney	APOPTOSIS	-1.63383	0.00682004	PPP3CB/RELA/TNFRSF10A/TNFRSF10B/CASP7/PIK3CA/PIK3CB/AKT1/BIRC2/CHUK/AKT2/CASP8/ATM/BAX/TNF/PPP3R1/CASP9/CASP3/PRKX/TP53/PRKAR2A/FAS/PPP3CA/PIK3CG/PIK3CD/NFKB1/CASP10/CSF2RB/XIAP/APAF1/CHP1/PRKAR1A/CYCS/PRKACA/CFLAR/NFKBIA/TNFSF10/BIRC3/MYD88/IL1B/BID/CAPN2/IRAK3
kidney	GENE AND PROTEIN EXPRESSION BY JAK STAT SIGNALING AFTER INTERLEUKIN 12 STIMULATION	-1.63405	0.022902	HNRNPDL/SOD1/ANXA2/LMNB1/PITPNA/ARF1/TCP1/IL10/CNN2/PSME2/HNRNPF/PDCD4/BOLA2B/CDC42/PAK2/HSPA9/TALDO1/HNRNPA2B1/CAPZA1/BOLA2/MSN/RAP1B/LCP1/SOD2
kidney	TOLL LIKE RECEPTOR TLR1 TLR2 CASCADE	-1.63561	0.006771	RELA/UBC/SFTPD/TAB3/RPS6KA1/DUSP3/TAB2/PPP2R1B/FOS/CHUK/DUSP7/PELI3/MAP2K4/CREB1/RPS6KA3/SKP1/MAP3K8/SIGIRR/PPP2R1A/TLR2/NOD2/MAP2K1/BTK/NFKB2/NFKB1/UBE2V1/PELI1/MAPK7/PPP2CA/MAPKAPK2/MAPK14/PELI2/TLR4/MAPKAPK3/NFKBIA/MAPK1/MAP2K3/MAP3K1/DUSP6/RIPK2/MYD88/IRAK3/CD36/S100A9/S100A8/S100A12
kidney	SIGNALING BY EGFR IN CANCER	-1.63642	0.0337305	SOS1/GRB2/NRAS/HSP90AA1/CBL/KRAS/HBEGF/AREG/EREG
kidney	GLYPICAN 1PATHWAY	-1.63661	0.0337305	VEGFA/FLT1/SRC/PRNP/TGFB1/SMAD2/NRG1/HCK/FYN/LYN/FGR
kidney	BIOCARTA GRANULOCYTES PATHWAY	-1.63782	0.0397486	TNF/ITGAM/ICAM1/SELPLG/SELL/CXCL8/ICAM2/ITGAL/PECAM1
kidney	DEATH RECEPTOR SIGNALLING	-1.64404	0.00294422	UBA52/IRAK1/PLEKHG5/TRIO/VAV3/RELA/UBC/TAB3/TNFRSF10A/TNFRSF10B/TAB2/VAV2/ADAM17/BIRC2/CHUK/TIAM2/CASP8/ARHGEF6/ARHGEF3/RBCK1/APH1B/TNF/CASP3/SOS1/ITSN1/FAS/HDAC1/AATF/VAV1/GNA13/ARHGEF2/RTN4/TIAM1/FGD2/FGD3/ARHGEF18/SOS2/NFKB1/CASP10/TNFAIP3/XIAP/ARHGEF1/FGD4/RHOA/ARHGDIA/BCL2L11/CYLD/CFLAR/AKAP13/PSEN1/TAX1BP1/NFKBIA/TNFSF10/RIPK2/BIRC3/MYD88
kidney	NEUTROPHIL DEGRANULATION	-1.64627	8.84014e-08	DGAT1/GOLGA7/TUBB4B/HUWE1/TMBIM1/B4GALT1/COPB1/CDK13/S100P/FUCA1/ANO6/PSMD7/PSMA5/ACLY/RAP2C/FTH1/SURF4/PSAP/ADA2/SIGLEC5/MAGT1/DYNC1LI1/PSMD1/CAT/KCMF1/PSMD13/DNAJC13/CD53/ARHGAP45/TMEM30A/RAB7A/RHOG/TNFAIP6/GSTP1/UNC13D/CD47/PRCP/TMC6/TOM1/GLIPR1/CNN2/ITGAM/VNN1/DOK3/ANPEP/TLR2/RAB31/DNAJC5/CAB39/CCT8/FCER1G/NRAS/XRCC6/HSPA1B/TOLLIP/CRISPLD2/DBNL/PLEKHO2/CYB5R3/MGST1/AP1M1/CD300A/VAPA/RAP1A/OST…
kidney	NEGATIVE REGULATORS OF DDX58 IFIH1 SIGNALING	-1.64835	0.0198745	NLRC5/UBA52/UBC/MAVS/TBK1/TRAF3/UBE2D2/OTUD5/IKBKE/HERC5/IFIH1/ATG12/UBE2K/ITCH/DDX58/UBE2L6/UBE2D1/TNFAIP3/CYLD/UBE2D3/TRIM25/TAX1BP1/ISG15
kidney	INTERLEUKIN 20 FAMILY SIGNALING	-1.64864	0.0317993	TYK2/JAK3/STAT5B/PTPN11/STAT3/IL10RB/STAT2/JAK1/JAK2/SOCS3
kidney	FOXO MEDIATED TRANSCRIPTION OF CELL CYCLE GENES	-1.65034	0.0397486	RBL2/FOXO1/SMAD3/SMAD2/CDKN1A/BTG1/FOXO3/KLF4/CDKN1B
kidney	CHONDROITIN SULFATE BIOSYNTHESIS	-1.65036	0.0346687	CHST7/CHSY1/CSGALNACT2/CHST15/VCAN
kidney	ANTIVIRAL MECHANISM BY IFN STIMULATED GENES	-1.65113	0.00504934	PPM1B/ABCE1/NEDD4/NUP93/SEH1L/NUP155/KPNA2/NUP88/NUP133/RNASEL/UBA52/OASL/NUP153/POM121C/UBC/NUP62/KPNB1/PDE12/NUP98/KPNA1/RAE1/POM121/HERC5/IFIT1/EIF4G1/OAS3/DDX58/UBE2L6/NUP210/EIF2AK2/KPNA4/MX1/EIF4A3/TPR/ARIH1/NUP50/NUP58/EIF4A1/EIF4E3/OAS1/EIF4E2/RANBP2/TRIM25/JAK1/EIF4G2/OAS2/NUP214/ISG15/MX2/FLNA
kidney	RHO GTPASE EFFECTORS	-1.65135	0.000121678	MAD1L1/PPP2R1B/CYBA/ACTB/PRKCD/PFN1/WIPF2/NUP98/TUBB4B/LIMK2/ROCK2/SRF/YWHAQ/BRK1/ACTG1/PMF1/KDM4C/MYL6/DYNC1LI1/DYNC1LI2/RHOG/NCF1/ARPC3/MAPRE1/PPP2R1A/PAFAH1B1/SRC/PPP1CC/GRB2/KIF5B/PPP2R5E/PKN2/NCOA2/BTK/PIK3C3/ARPC4/TUBA1A/CDC42/CTNNA1/PDPK1/PAK2/AHCTF1/CTNNB1/ARPC1A/ACTR3/PPP2CA/RHOA/MYL12B/PPP1R12A/ARPC1B/RHOQ/WIPF1/FMNL1/CLIP1/MAPK14/ARPC5/TAOK1/NCKAP1L/DIAPH2/ARPC2/PPP2R5C/RANBP2/WAS/ROCK…
kidney	RIG I LIKE RECEPTOR SIGNALING PATHWAY	-1.65194	0.00934041	CHUK/TBK1/TRAF3/CASP8/OTUD5/IKBKE/IFIH1/TNF/ATG12/DDX58/AZI2/NFKB1/CASP10/CYLD/MAPK14/IRF7/TANK/TRIM25/DDX3Y/DDX3X/CXCL8/NFKBIA/MAP3K1/ISG15
kidney	PI3K EVENTS IN ERBB2 SIGNALING	-1.65317	0.0337305	GRB2/NRG1/HBEGF/EREG
kidney	SIGNALING BY EGFR	-1.6533	0.0173257	AAMP/EPS15L1/UBA52/EPN1/STAM2/UBC/SHC1/PIK3CA/ADAM17/PTPN11/SOS1/SRC/GRB2/PTPN12/NRAS/EPS15/SH3KBP1/CDC42/PXN/CBL/KRAS/ADAM10/CSK/PAG1/HBEGF/AREG/EREG
kidney	BIOCARTA PAR1 PATHWAY	-1.65461	0.0274312	GNA13/PIK3CG/GNAQ/PLCB1/ARHGEF1/RHOA/ROCK1/PTK2B/PRKCB
kidney	SIGNALING BY CTNNB1 PHOSPHO SITE MUTANTS	-1.65684	0.0376808	PPP2R1A/GSK3B/PPP2R5E/CTNNB1/CSNK1A1/PPP2CA/APC/PPP2R5C/PPP2R5A
kidney	FOXO MEDIATED TRANSCRIPTION	-1.65686	0.0112678	STK11/AKT2/YWHAQ/KAT2B/NR3C1/CAT/RBL2/HDAC1/FOXO1/ATXN3/SMAD3/RETN/BCL6/SMAD2/CREBBP/BCL2L11/CDKN1A/BTG1/YWHAB/FOXO3/KLF4/CDKN1B/YWHAZ/EP300/SOD2
kidney	SIGNALING BY ERBB2	-1.65732	0.0176392	UBC/SHC1/PIK3CA/PRKCE/AKT1/PRKCD/CUL5/AKT2/PTPN18/SOS1/SRC/GRB2/PTPN12/NRAS/HSP90AA1/RHOA/MEMO1/USP8/KRAS/NRG1/DIAPH1/ERBIN/FYN/HBEGF/EREG
kidney	ADIPOCYTOKINE SIGNALING PATHWAY	-1.65816	0.00659833	AKT1/ADIPOR1/CHUK/ADIPOR2/STK11/AKT2/PTPN11/TNF/ACSL5/ACSL6/PRKAG2/STAT3/NFKB1/CPT1A/ACSL4/IRS2/JAK2/CAMKK2/NFKBIA/ACSL1/SOCS3/CD36/TNFRSF1B/RXRA
kidney	RAF ACTIVATION	-1.65822	0.022374	CALM1/PPP2R1B/ARAF/RAF1/MARK3/MAP2K2/PPP2R1A/SRC/PPP1CC/KSR1/PPP2R5E/NRAS/MAP2K1/PPP2CA/MAP3K11/SHOC2/BRAF/PPP2R5C/PPP2R5A/PPP1CB/YWHAB/JAK2/KRAS
kidney	DISEASES ASSOCIATED WITH O GLYCOSYLATION OF PROTEINS	-1.65903	0.0150914	NOTCH1/ADAMTSL4/NOTCH4/C1GALT1/NOTCH2/LFNG/CFP/THBS1
kidney	MAPK TRK PATHWAY	-1.65997	0.0217068	FOS/PRKCD/SRF/RAF1/RIT1/CREB1/NRAS/MAP2K1/RAP1A/MAP3K2/MAPK7/MAPKAPK2/MAPK14/BRAF/KRAS/MAPK1/MAP2K3/RAP1B
kidney	CXCR4 PATHWAY	-1.6616	0.00444859	VAV1/VPS4B/GNA13/ITCH/PIK3CG/SRC/FOXO1/PIK3CD/STAT3/CDC42/PXN/PDPK1/PLCB1/PLCB2/UBQLN1/RHOA/CRK/GNAI2/ARRB2/RALB/GRK2/RHOC/STAT2/JAK2/GNB1/PTK2B/CSK/GNAI3/PTPN6/ITGA4/RHOB/GRK6/PTEN/HCK/PAG1/PTPRC/RAP1B/GNG2/FYN/LYN/FGR
kidney	INTERLEUKIN 12 SIGNALING	-1.66235	0.0105768	VAMP7/HNRNPDL/SOD1/ANXA2/LMNB1/TYK2/PITPNA/ARF1/TCP1/IL10/CNN2/PSME2/HNRNPF/PDCD4/BOLA2B/CDC42/PAK2/HSPA9/TALDO1/HNRNPA2B1/CAPZA1/BOLA2/JAK1/JAK2/MSN/RAP1B/LCP1/SOD2
kidney	FAS PATHWAY	-1.66501	0.0144114	RFC1/PIK3CA/PIK3CB/AKT1/BIRC2/CHUK/CASP8/CASP3/FAS/SRC/BTK/PIK3CD/PDPK1/SYK/CLTC/CASP10/MAPK14/CFLAR/MAP3K1/BIRC3/BID/EZR
kidney	GRB2 EVENTS IN ERBB2 SIGNALING	-1.66639	0.0279555	SOS1/GRB2/NRAS/KRAS/NRG1/HBEGF/EREG
kidney	BIOCARTA FMLP PATHWAY	-1.66677	0.0200502	PPP3CB/RELA/CALM1/PAK1/RAF1/NCF1/PPP3CA/MAP2K2/MAP2K1/CALM2/PLCB1/NFKB1/NFATC1/CAMK1/MAPK14/NFATC3/NFKBIA/FPR1/MAPK1/MAP2K3/MAP3K1/NCF2
kidney	C TYPE LECTIN RECEPTORS CLRS	-1.66754	0.00217946	PPP3CB/RELA/UBC/PSMB3/TAB3/CALM1/PAK1/TAB2/CARD9/PSMC6/RELB/PSME4/PSMC1/BCL10/CHUK/PRKCD/PSME3/UBE2D2/CASP8/PSMD7/RAF1/PSMA5/PSMB4/CLEC7A/PSMD1/UBA3/PSMD13/SKP1/PPP3R1/PPP3CA/PSME2/SRC/PSMA7/PSMD9/PSME1/FCER1G/NRAS/AHCYL1/PYCARD/PDPK1/SYK/NFKB2/NFKB1/PSMB8/PAK2/UBE2V1/UBE2D1/NFATC1/PSMA2/CLEC4D/PSMB10/PSMA6/CREBBP/PSMB9/PRKACA/NFATC3/PSMA4/KRAS/CLEC4E/NFKBIA/ICAM2/EP300/MALT1/IL1B/FYN/LYN/ICAM3
kidney	INACTIVATION OF CSF3 G CSF SIGNALING	-1.6689	0.022902	CUL5/UBE2D2/TYK2/STAT5B/ELOB/RNF7/STAT3/SYK/UBE2D1/CSF3R/UBE2D3/JAK1/JAK2/HCK/SOCS3/LYN
kidney	PLATELET SENSITIZATION BY LDL	-1.67122	0.0232609	PTPN11/PPP2R1A/PPP2R5E/PPP2CA/MAPK14/PPP2R5C/PPP2R5A/PTPN6/PECAM1/FGR
kidney	SIGNALING BY CSF3 G CSF	-1.67258	0.0137614	CUL5/UBE2D2/TYK2/STAT5B/PTPN11/ELOB/GRB2/RNF7/STAT3/SYK/UBE2D1/CSF3R/UBE2D3/JAK1/JAK2/KRAS/HCK/SOCS3/LYN
kidney	SIGNALING BY WNT	-1.6751	4.87319e-05	PPP3CB/UBC/PSMB3/CALM1/CHD8/FRAT1/ZRANB1/CSNK2A1/TNRC6A/RBBP5/AKT1/PPP2R1B/SMARCA4/PSMC6/PSME4/PSMC1/AGO3/PSME3/PFN1/VPS29/RBX1/AKT2/VPS26A/PSMD7/PSMA5/PSMB4/CTBP1/PSMD1/PSMD13/TRRAP/TNKS2/SKP1/AGO1/PPP3R1/KMT2D/HDAC1/PPP3CA/CSNK1G2/PPP2R1A/PSME2/GSK3B/PSMA7/PSMD9/PSME1/CLTB/PPP2R5E/TLE3/TNRC6B/USP34/CDC73/PLCB1/PLCB2/PSMB8/CLTC/CTNNB1/NFATC1/FRAT2/CSNK1A1/PSMA2/AGO4/XIAP/PPP2CA/PSMB10/RHOA/TMED5…
kidney	RETINOIC ACID PATHWAY	-1.67811	0.0223287	HDAC1/CCNH/NCOA2/NCOA3/CREBBP/VDR/MAPK14/PRKACA/NCOA1/MAPK1/EP300/RARA/RXRA
kidney	PI3KCI PATHWAY	-1.68231	0.013232	PLEKHA2/PIK3CG/SRC/DAPP1/NRAS/BTK/PIK3CD/RAP1A/PDPK1/SYK/HSP90AA1/RHOA/ARF5/CYTH1/ADAP1/KRAS/FOXO3/PTEN/HCK/FYN/LYN/FGR
kidney	GAB1 SIGNALOSOME	-1.68231	0.0254031	PTPN11/SRC/GRB2/PXN/CSK/PAG1/HBEGF/AREG/EREG
kidney	BIOCARTA BIOPEPTIDES PATHWAY	-1.68253	0.0161378	HRAS/CALM3/SHC1/CALM1/RAF1/SOS1/MAP2K2/GRB2/MAP2K1/CALM2/STAT3/MAPK14/JAK2/PTK2B/MAPK1/FYN/PRKCB
kidney	EPHA MEDIATED GROWTH CONE COLLAPSE	-1.68696	0.0173257	ROCK2/MYL6/SRC/RHOA/MYL12B/ROCK1/MYH9/FYN/LYN
kidney	RAC1 PATHWAY	-1.69237	0.0055516	ARPC4/STAT3/CTNNA1/PLCB2/PAK2/CTNNB1/ACTR3/ARPC1B/ARHGDIA/MAPK14/MAP3K11/ARPC5/ARPC2/CRK/WASF2/CYBB/CYFIP2/ACTR2/IQGAP1/MAP2K3/MAP3K1/NCF2
kidney	DDX58 IFIH1 MEDIATED INDUCTION OF INTERFERON ALPHA BETA	-1.69887	0.00405677	CHUK/TBK1/TRAF3/UBE2D2/CASP8/OTUD5/IKBKE/HERC5/IFIH1/ATG12/UBE2K/ITCH/DDX58/UBE2L6/NFKB2/NFKB1/CASP10/UBE2D1/HSP90AA1/TNFAIP3/CREBBP/CYLD/UBE2D3/IRF7/TANK/TRIM25/TAX1BP1/NFKBIA/EP300/MAP3K1/ISG15/S100A12
kidney	P38 ALPHA BETA PATHWAY	-1.70686	0.016561	SRC/CDC42/PAK2/MAPK14/RALB/DUSP1/MAP3K3/MAP2K3/HCK/FYN/LYN/FGR
kidney	ERBB4 PATHWAY	-1.71941	0.00632931	SHC1/PIK3CA/TAB2/PIK3CB/ADAM17/CBFA2T3/STAT5B/WWP1/ITCH/GRB2/PIK3CD/MDM2/NCOR1/JAK2/NRG1/MAPK1/FYN/HBEGF/EREG
kidney	O GLYCOSYLATION OF TSR DOMAIN CONTAINING PROTEINS	-1.72102	0.00999625	ADAMTSL4/CFP/THBS1
kidney	PI3K AKT SIGNALING IN CANCER	-1.72122	0.00158615	AKT2/RICTOR/GSK3A/CREB1/PTPN11/CASP9/RHOG/VAV1/GSK3B/SRC/GRB2/FOXO1/PIK3CD/PDPK1/MDM2/RPS6KB2/CDKN1A/IRS2/NRG1/FOXO3/CDKN1B/PIK3AP1/PTEN/NR4A1/FYN/HBEGF/RAC2/AREG/EREG
kidney	NEGATIVE REGULATION OF THE PI3K AKT NETWORK	-1.72201	0.00143095	PTPN11/RHOG/VAV1/TRIB3/PPP2R1A/SRC/GRB2/PPP2R5E/PIK3CD/PPP2CA/PIP4K2A/PPP2R5C/IRS2/PPP2R5A/NRG1/MAPK1/PIK3AP1/PTEN/MYD88/FYN/HBEGF/RAC2/AREG/EREG
kidney	SIGNALING BY WNT IN CANCER	-1.72538	0.0073478	CTBP1/TNKS2/PPP2R1A/GSK3B/PPP2R5E/CTNNB1/CSNK1A1/PPP2CA/APC/CTBP2/PPP2R5C/PPP2R5A/TCF7L2
kidney	SIGNALING BY ERBB2 IN CANCER	-1.73659	0.00934041	SOS1/GRB2/PTPN12/NRAS/HSP90AA1/KRAS/NRG1/ERBIN/HBEGF/EREG
kidney	EPHA FWDPATHWAY	-1.73885	0.00939145	PIK3CG/SRC/RHOA/CBL/CRK/ROCK1/HCK/FYN/LYN/FGR
kidney	TCR PATHWAY	-1.73976	0.00294422	STIM1/PTPN11/SOS1/MAP3K8/VAV1/GRB2/NRAS/DBNL/RAP1A/CDC42/PDPK1/CBL/LCP2/FYB1/WAS/KRAS/CSK/SH3BP2/PTPN6/MALT1/PTEN/PAG1/PTPRC/RASGRP2/RASSF5/FYN/PRKCB/FLNA
kidney	CD8 TCR PATHWAY	-1.74015	0.00247938	ORAI1/SHC1/PRKCE/AKT1/BCL10/CHUK/STIM1/SOS1/MAP3K8/VAV1/GRB2/NRAS/RAP1A/PDPK1/CBL/LCP2/KRAS/CSK/PTPN6/MALT1/PAG1/PTPRC/RASGRP2/RASSF5/FYN/PRKCB
kidney	DISEASES OF SIGNAL TRANSDUCTION BY GROWTH FACTOR RECEPTORS AND SECOND MESSENGERS	-1.74294	8.535e-08	AKT1/PPP2R1B/ADAM17/PSMC6/PSME4/PSMC1/ACTB/CHUK/ZMYM2/NOTCH1/ARAF/DUSP7/PSME3/RBX1/AKT2/ZC3HAV1/RICTOR/PSMD7/ACTG1/RAF1/KAT2B/PSMA5/TBL1XR1/PSMB4/EEF1G/CTBP1/GSK3A/CREB1/PSMD1/APH1B/POLR2B/QKI/PSMD13/TRAK1/STAT5B/PTPN11/MARK3/TNKS2/SKP1/CASP9/SOS1/RHOG/EML4/HDAC1/SEL1L/BCL11A/MAP2K2/VAV1/AKAP9/PPP2R1A/PSME2/GSK3B/SRC/PSMA7/PPP1CC/GRB2/KIF5B/PTPN12/AP3B1/PSMD9/KSR1/TPM4/PSME1/PPP2R5E/FXR1/FOXO1/NR…
kidney	ERBB2 ACTIVATES PTK6 SIGNALING	-1.74443	0.00553421	NRG1/HBEGF/EREG
kidney	ERBB NETWORK PATHWAY	-1.75059	0.0055516	HSP90AA1/NRG1/HBEGF/AREG/EREG
kidney	LONG TERM POTENTIATION	-1.75562	0.00190172	RAF1/RPS6KA3/PPP3R1/PRKX/PPP3CA/MAP2K2/PPP1CC/NRAS/MAP2K1/CALM2/RAP1A/GNAQ/PLCB1/PLCB2/PPP1R12A/CHP1/ATF4/CREBBP/PRKACA/BRAF/PPP1CA/PPP1CB/KRAS/MAPK1/EP300/RAP1B/PRKCB
kidney	VEGFR1 2 PATHWAY	-1.75829	0.00111248	RAF1/ARF1/VEGFA/FES/PTPN11/MYOF/FLT1/MAP2K2/SRC/GRB2/MAP2K1/CDC42/CTNNA1/PXN/PDPK1/PAK2/CTNNB1/HSP90AA1/RHOA/PTPRJ/CBL/MAPKAPK2/MAPK14/PRKACA/BRAF/ROCK1/CAMKK2/PTK2B/IQGAP1/PTPN6/MAPK1/MAP2K3/VCL/FYN/PRKCB
kidney	INTERFERON ALPHA BETA SIGNALING	-1.76941	0.00098879	RSAD2/IFI6/TYK2/HLA-E/PTPN1/PTPN11/IFIT1/HLA-F/OAS3/IFNAR1/IFIT2/MX1/PSMB8/GBP2/IRF9/IFITM3/SAMHD1/XAF1/IFIT3/IFNAR2/OAS1/IFI35/ISG20/IRF7/ADAR/IRF1/STAT2/JAK1/OAS2/PTPN6/SOCS3/ISG15/MX2/IFITM2
kidney	RHO GTPASES ACTIVATE NADPH OXIDASES	-1.7823	0.00423454	PIK3C3/MAPK14/CYBB/MAPK1/NCF2/RAC2/PRKCB/S100A9/S100A8
kidney	ERBB2 REGULATES CELL MOTILITY	-1.79569	0.00193043	RHOA/MEMO1/NRG1/DIAPH1/HBEGF/EREG
kidney	RHO GTPASES ACTIVATE CIT	-1.80568	0.00272074	MYL6/RHOA/MYL12B/PPP1R12A/RHOC/PPP1CB/MYH9/CDKN1B/RHOB
kidney	IL8 CXCR1 PATHWAY	-1.82524	0.001895	PIK3CG/ARRB1/PDPK1/PLCB1/PLCB2/CBL/GNAI2/ARRB2/GRK2/GNB1/CXCL8/HCK/GNG2/LYN/PRKCB/FGR
kidney	THROMBIN PAR1 PATHWAY	-1.83602	0.000522274	GNA13/SNX2/ARRB1/GNAQ/PLCB1/PLCB2/ARHGEF1/RHOA/ARHGDIA/GNAI2/ROCK1/AKAP13/GNB1/GRK3/PKN1/GNAI3/VASP/GNG2/PRKCB
kidney	IL8 CXCR2 PATHWAY	-1.84361	0.000735368	RAB7A/PPP2R1A/PIK3CG/ARRB1/PDPK1/PLCB1/PLCB2/PPP2CA/CBL/GNAI2/ARRB2/DOCK2/GNB1/CXCL8/VASP/HCK/GNG2/RAC2/LYN/PRKCB/FGR
kidney	NATURAL KILLER CELL MEDIATED CYTOTOXICITY	-1.8477	4.87319e-05	HLA-C/PPP3CB/VAV3/TNFRSF10A/TNFRSF10B/SHC1/PIK3CA/PAK1/HLA-B/NFAT5/PIK3CB/VAV2/ITGB2/IFNGR2/ARAF/RAF1/HLA-E/PTPN11/TNF/PPP3R1/SH2D1B/CASP3/SOS1/FAS/PPP3CA/MAP2K2/VAV1/FCGR3A/PIK3CG/IFNAR1/CD244/ICAM1/GRB2/FCER1G/NRAS/MAP2K1/PIK3CD/SOS2/SYK/NFATC1/CHP1/LCP2/NFATC3/IFNAR2/BRAF/KRAS/PTK2B/ICAM2/SH3BP2/PTPN6/MAPK1/TNFSF10/ITGAL/BID/FYN/RAC2/CD48/PRKCB
kidney	TXA2PATHWAY	-1.90614	4.84217e-05	GNA13/PTGIR/PIK3CG/SRC/ICAM1/GNAQ/SYK/PLCB2/ARHGEF1/RHOA/MAPK14/PRKACA/GNAI2/ROCK1/ARRB2/GRK2/GNB1/GRK3/SLC9A3R1/HCK/GNG2/FYN/LYN/PRKCB/FGR
