# Supplementary material for: Systems level identification of a matrisome-associated macrophage polarisation state in multi-organ fibrosis
Source: eLife. 2023 Sep 14;12:e85530. doi: 10.7554/eLife.85530 (PMC10547479; doi:10.7554/eLife.85530)
Supplement: Figure 2—source data 1. [file elife-85530-fig2-data1.xlsx]

## Sheet: SuppTable4
Figure 2-source data 1. Marker genes for subclusters within SPP1+ macrophages
Cluster	gene	Avg. Log2FC (Cluster / Remaining Cells)	Proportion of cells expressing gene in cluster	p-value	adjusted p-value
C3-MAM	CHI3L1	1.83167	0.496	0	0
C3-MAM	MMP7	1.75194	0.304	0	0
C3-MAM	MMP9	1.31645	0.45	0	0
C3-MAM	SPP1	1.29282	0.954	0	0
C3-MAM	CTSK	1.20159	0.342	0	0
C3-MAM	CD52	1.13747	0.789	0	0
C0	HLA-DPA1	1.1581	0.881	0	0
C0	CD74	1.10725	0.976	0	0
C0	HLA-DPB1	1.08346	0.89	0	0
C0	HLA-DRA	1.00972	0.957	0	0
C1	CTSD	1.73883	0.841	0	0
C1	CCL18	1.54609	0.679	0	0
C1	FTH1	1.39571	0.89	0	0
C1	MT-ND4	1.24521	0.872	0	0
C1	GCHFR	1.15185	0.515	0	0
C1	APOC1	1.1453	0.872	0	0
C1	MT-CO3	1.02204	0.872	0	0
C1	CD68	1.00052	0.788	0	0
C1	APOE	1.00356	0.828	8.12773e-253	8.5455e-249
C2	IL1B	2.14642	0.454	0	0
C2	CCL4	2.09983	0.443	0	0
C2	CXCL3	1.5757	0.573	0	0
C2	CXCL2	1.50384	0.613	0	0
C2	NFKBIA	1.24525	0.799	0	0
C2	EREG	1.21493	0.44	0	0
C2	CCL4L2	1.53783	0.348	1.01089e-300	1.06285e-296
C2	CCL20	1.46957	0.33	8.02941e-251	8.44212e-247
C2	AREG	1.01443	0.511	8.1926e-236	8.61369e-232
C2	IER3	1.17043	0.393	1.06201e-194	1.1166e-190
C2	CCL3	1.92688	0.438	3.22017e-183	3.38568e-179
C2	G0S2	1.06156	0.3	1.24132e-161	1.30512e-157
C2	TIMP1	1.06927	0.691	1.10849e-140	1.16547e-136
C4	MT-ATP8	1.87938	0.917	0	0
C4	MT-ND4L	1.83941	0.963	0	0
C4	MT-ATP6	1.25336	0.999	0	0
C4	MT-ND6	1.11545	0.849	0	0
C4	MT-CO1	1.0042	0.999	0	0
C5	CCL2	3.82822	0.998	0	0
C5	CTSL	1.24395	0.887	2.18604e-290	2.2984e-286
C6	S100A4	1.20526	0.986	6.4234e-298	6.75356e-294
C6	CRIP1	1.77022	0.831	1.12059e-241	1.17819e-237
C6	S100A8	1.36239	0.655	5.82186e-159	6.12111e-155
C6	FN1	1.39651	0.639	1.80393e-123	1.89665e-119
C6	S100A9	1.15469	0.784	1.21577e-88	1.27826e-84
C7	MT1X	2.85218	0.868	0	0
C7	MT2A	2.81531	0.999	0	0
C7	MT1G	2.66354	0.543	0	0
C7	MT1E	1.6495	0.583	0	0
C8	IFIT1	1.1094	0.464	0	0
C8	IFIT3	1.01971	0.562	1.47388e-208	1.54963e-204
C8	MX1	1.1648	0.665	1.71065e-197	1.79857e-193
C8	ISG15	2.76342	0.936	2.04141e-194	2.14634e-190
C8	CXCL10	2.16196	0.236	3.31876e-122	3.48934e-118
C8	IFITM3	1.56738	0.94	3.55787e-117	3.74074e-113
C8	LY6E	1.18899	0.841	5.24513e-95	5.51473e-91
C8	IFI6	1.42109	0.931	1.83332e-85	1.92755e-81
C8	TYMP	1.06004	0.807	4.13815e-44	4.35085e-40
