# Supplementary material for: Systems level identification of a matrisome-associated macrophage polarisation state in multi-organ fibrosis
Source: eLife. 2023 Sep 14;12:e85530. doi: 10.7554/eLife.85530 (PMC10547479; doi:10.7554/eLife.85530)
Supplement: Figure 2—source data 2. [file elife-85530-fig2-data2.xlsx]

## Sheet: SuppTable5
Figure 2-source data 2. Signature genes of SPP1+MAM+ macrophages
Symbol	Gene Name	Avg. Log2FC (SPP1+MAM+ / SPP1+MAM-)	Difference in proportion of expression between SPP1+MAM+ and SPP1+MAM-
SPP1	secreted phosphoprotein 1	1.76967	0.426833
CHI3L1	chitinase 3 like 1	1.71949	0.236667
MMP9	matrix metallopeptidase 9	1.60651	0.273167
LPL	lipoprotein lipase	1.60416	0.3545
MATK	megakaryocyte-associated tyrosine kinase	1.52634	0.373667
GPC4	glypican 4	1.3105	0.213833
TM4SF19	transmembrane 4 L six family member 19	1.21723	0.180667
CTSK	cathepsin K	1.16922	0.200167
TIMP3	TIMP metallopeptidase inhibitor 3	1.07876	0.142
MMP7	matrix metallopeptidase 7	1.06005	0.121333
CD109	CD109 molecule	1.01773	0.239
FBP1	fructose-bisphosphatase 1	1.00471	0.2885
SDC2	syndecan 2	0.995432	0.239333
FAM20C	FAM20C golgi associated secretory pathway kinase	0.98447	0.218333
SCIN	scinderin	0.965575	0.172833
MFSD12	major facilitator superfamily domain containing 12	0.963125	0.222333
RGCC	regulator of cell cycle	0.962029	0.261167
CRABP2	cellular retinoic acid binding protein 2	0.947091	0.131667
HMG20B	high mobility group 20B	0.93561	0.232
HSD3B7	hydroxy-delta-5-steroid dehydrogenase, 3 beta- and steroid delta-isomerase 7	0.906779	0.211833
EMP1	epithelial membrane protein 1	0.902214	0.239667
LINC01010	long intergenic non-protein coding RNA 1010	0.898254	0.149167
TSC22D1	TSC22 domain family member 1	0.892266	0.1955
CSF1	colony stimulating factor 1	0.884752	0.1225
FDX1	ferredoxin 1	0.884229	0.217333
KCNN4	potassium calcium-activated channel subfamily N member 4	0.866778	0.183833
MREG	melanoregulin	0.862244	0.1825
ALCAM	activated leukocyte cell adhesion molecule	0.86149	0.219667
GEM	GTP binding protein overexpressed in skeletal muscle	0.852965	0.196667
TGM2	transglutaminase 2	0.852331	0.128333
IL1RN	interleukin 1 receptor antagonist	0.840519	0.207333
FABP5	fatty acid binding protein 5	0.823289	0.1825
SERPINE1	serpin family E member 1	0.81897	0.154
GCLC	glutamate-cysteine ligase catalytic subunit	0.804406	0.204667
CD276	CD276 molecule	0.795139	0.189167
FABP4	fatty acid binding protein 4	0.790381	0.124
MITF	melanocyte inducing transcription factor	0.786986	0.196833
SLC1A4	solute carrier family 1 member 4	0.784049	0.14
CBLB	Cbl proto-oncogene B	0.750642	0.151167
GSN	gelsolin	0.747437	0.214333
MGLL	monoglyceride lipase	0.746437	0.181833
CYP27A1	cytochrome P450 family 27 subfamily A member 1	0.74275	0.193167
PLA2G7	phospholipase A2 group VII	0.74076	0.162167
MRAS	muscle RAS oncogene homolog	0.734892	0.181667
NRIP3	nuclear receptor interacting protein 3	0.733103	0.143833
FAIM	Fas apoptotic inhibitory molecule	0.729656	0.142
ITGB5	integrin subunit beta 5	0.724003	0.134333
ASPHD1	aspartate beta-hydroxylase domain containing 1	0.714048	0.0983333
RALA	RAS like proto-oncogene A	0.699778	0.1855
CD9	CD9 molecule	0.696918	0.179833
RAC2	Rac family small GTPase 2	0.695258	0.193667
BCAT1	branched chain amino acid transaminase 1	0.692004	0.228
LSP1	lymphocyte specific protein 1	0.691524	0.222167
SLAMF7	SLAM family member 7	0.689408	0.1645
MTHFS	methenyltetrahydrofolate synthetase	0.684272	0.145833
ITGB1BP1	integrin subunit beta 1 binding protein 1	0.680523	0.173667
SLC29A3	solute carrier family 29 member 3	0.678657	0.147667
TNFSF14	TNF superfamily member 14	0.677382	0.1075
GLIPR2	GLI pathogenesis related 2	0.677279	0.222667
ATP6V0D2	ATPase H+ transporting V0 subunit d2	0.674039	0.119833
MAPK13	mitogen-activated protein kinase 13	0.672276	0.139833
TOMM40	translocase of outer mitochondrial membrane 40	0.667757	0.1495
CALU	calumenin	0.666231	0.182
PPP1R14B	protein phosphatase 1 regulatory inhibitor subunit 14B	0.664153	0.1695
NCEH1	neutral cholesterol ester hydrolase 1	0.656913	0.160333
PFKP	phosphofructokinase, platelet	0.656859	0.116667
CCDC88A	coiled-coil domain containing 88A	0.646324	0.197833
CXXC5	CXXC finger protein 5	0.643068	0.16
SDC4	syndecan 4	0.638816	0.154333
FGR	FGR proto-oncogene, Src family tyrosine kinase	0.634431	0.187667
EVL	Enah/Vasp-like	0.633355	0.174
TREM2	triggering receptor expressed on myeloid cells 2	0.632056	0.194167
PCYT1A	phosphate cytidylyltransferase 1A, choline	0.629941	0.1485
KIAA0930	KIAA0930	0.629354	0.180333
CDH23	cadherin related 23	0.625336	0.120667
LRCH1	leucine rich repeats and calponin homology domain containing 1	0.615328	0.122833
COL6A2	collagen type VI alpha 2 chain	0.614755	0.111
RPS6KA1	ribosomal protein S6 kinase A1	0.610625	0.136167
SCARB2	scavenger receptor class B member 2	0.60965	0.172333
ACTN1	actinin alpha 1	0.60818	0.169667
UBTD1	ubiquitin domain containing 1	0.603766	0.113167
ASAP1	ArfGAP with SH3 domain, ankyrin repeat and PH domain 1	0.603684	0.127
ZMIZ1-AS1	ZMIZ1 antisense RNA 1	0.602695	0.104833
ARMC9	armadillo repeat containing 9	0.599934	0.11
LIMS1	LIM zinc finger domain containing 1	0.59775	0.205333
RHOC	ras homolog family member C	0.597411	0.166167
MYO1E	myosin IE	0.596885	0.139667
MYOF	myoferlin	0.594217	0.156667
CAPG	capping actin protein, gelsolin like	0.594152	0.177
GALM	galactose mutarotase	0.594092	0.155333
ANXA11	annexin A11	0.591731	0.199167
ARID5B	AT-rich interaction domain 5B	0.590379	0.147833
MGST1	microsomal glutathione S-transferase 1	0.5871	0.126
APOC1	apolipoprotein C1	0.586778	0.133667
TWSG1	twisted gastrulation BMP signaling modulator 1	0.584587	0.116333
G6PD	glucose-6-phosphate dehydrogenase	0.582855	0.121
BCAP31	B cell receptor associated protein 31	0.578501	0.157
MMP19	matrix metallopeptidase 19	0.578464	0.146
HM13	histocompatibility minor 13	0.577241	0.201167
CYB5A	cytochrome b5 type A	0.576957	0.130667
CD52	CD52 molecule	0.575623	0.166167
GM2A	ganglioside GM2 activator	0.574442	0.143167
PDXK	pyridoxal kinase	0.573233	0.160667
CD36	CD36 molecule	0.571825	0.114167
SPRY2	sprouty RTK signaling antagonist 2	0.566985	0.110667
COL6A1	collagen type VI alpha 1 chain	0.566895	0.116667
C1orf122	chromosome 1 open reading frame 122	0.56664	0.1455
FN1	fibronectin 1	0.565275	0.121
C1orf21	chromosome 1 open reading frame 21	0.563922	0.0988333
LONP1	lon peptidase 1, mitochondrial	0.562688	0.114
TRPV2	transient receptor potential cation channel subfamily V member 2	0.561323	0.134167
SRM	spermidine synthase	0.56059	0.131833
MRTO4	MRT4 homolog, ribosome maturation factor	0.560492	0.1255
PIM3	Pim-3 proto-oncogene, serine/threonine kinase	0.559105	0.135667
NUMB	NUMB endocytic adaptor protein	0.558363	0.153667
ATP13A3	ATPase 13A3	0.558169	0.140833
FNIP2	folliculin interacting protein 2	0.557951	0.156
SLC43A3	solute carrier family 43 member 3	0.557271	0.166833
TNS3	tensin 3	0.557252	0.128333
ABHD2	abhydrolase domain containing 2, acylglycerol lipase	0.557152	0.1505
ACADM	acyl-CoA dehydrogenase medium chain	0.556636	0.0993333
ITGA5	integrin subunit alpha 5	0.555733	0.119333
RRP1	ribosomal RNA processing 1	0.555385	0.0956667
CENPW	centromere protein W	0.554462	0.112333
PAPSS1	3'-phosphoadenosine 5'-phosphosulfate synthase 1	0.551595	0.164333
C15orf48	chromosome 15 open reading frame 48	0.550192	0.191333
LHFPL2	LHFPL tetraspan subfamily member 2	0.549081	0.173833
ATP2B4	ATPase plasma membrane Ca2+ transporting 4	0.548563	0.127333
LRRC59	leucine rich repeat containing 59	0.546015	0.1445
APOE	apolipoprotein E	0.543285	0.150167
HPCAL1	hippocalcin like 1	0.53867	0.158833
SRD5A3	steroid 5 alpha-reductase 3	0.538111	0.139667
TXNRD1	thioredoxin reductase 1	0.53703	0.151
ABCC3	ATP binding cassette subfamily C member 3	0.534166	0.126333
ATP6V1H	ATPase H+ transporting V1 subunit H	0.528748	0.124333
FAM20A	FAM20A golgi associated secretory pathway pseudokinase	0.526848	0.1195
ZNF385A	zinc finger protein 385A	0.526047	0.157333
GTF2H3	general transcription factor IIH subunit 3	0.52466	0.0955
FABP3	fatty acid binding protein 3	0.52342	0.116833
ACTR1B	actin related protein 1B	0.522278	0.097
NRBP1	nuclear receptor binding protein 1	0.521751	0.118333
CNIH4	cornichon family AMPA receptor auxiliary protein 4	0.521416	0.129833
CADM1	cell adhesion molecule 1	0.520913	0.112333
IL4I1	interleukin 4 induced 1	0.520788	0.1155
CHST11	carbohydrate sulfotransferase 11	0.518879	0.146
SEMA3C	semaphorin 3C	0.517817	0.11
MAP4K3	mitogen-activated protein kinase kinase kinase kinase 3	0.516799	0.104833
SORT1	sortilin 1	0.512559	0.125167
TP53I11	tumor protein p53 inducible protein 11	0.512008	0.0978333
ADAM9	ADAM metallopeptidase domain 9	0.510313	0.139667
PKM	pyruvate kinase M1/2	0.509909	0.117833
GPN3	GPN-loop GTPase 3	0.509732	0.107167
NDUFS3	NADH:ubiquinone oxidoreductase core subunit S3	0.508643	0.1615
FERMT3	FERM domain containing kindlin 3	0.507539	0.148
RASAL2	RAS protein activator like 2	0.50288	0.119167
SPARC	secreted protein acidic and cysteine rich	0.502248	0.1235
PEA15	proliferation and apoptosis adaptor protein 15	0.501771	0.149167
CD164	CD164 molecule	0.501734	0.1425
