# Supplementary material for: Systems level identification of a matrisome-associated macrophage polarisation state in multi-organ fibrosis
Source: eLife. 2023 Sep 14;12:e85530. doi: 10.7554/eLife.85530 (PMC10547479; doi:10.7554/eLife.85530)
Supplement: Figure 2—source data 3. [file elife-85530-fig2-data3.xlsx]

## Sheet: SuppTable6
Figure 2-source data 3. GSEA analysis of pathways upregulated/downregulated in SPP1+MAM+ macrophages (relative to SPP1+MAM- macrophages)
Pathway	NES	FDR	Core Enrichment
COLLAGEN DEGRADATION	2.05256	0.00015155	MMP9/CTSK/MMP7/COL6A2/MMP19/COL6A1/ADAM9/COL8A2
DEGRADATION OF THE EXTRACELLULAR MATRIX	2.00984	1.19234e-05	SPP1/MMP9/CTSK/MMP7/COL6A2/MMP19/COL6A1/FN1/ADAM9/COL8A2/BSG/HTRA1/NCSTN/CD44/TIMP2/A2M/MMP2/CAPN7/CTSB/CTSL/CAPN1/COL4A2
VIBRIO CHOLERAE INFECTION	2.00588	7.45004e-05	ATP6V0D2/ATP6V1H/TCIRG1/SEC61A1/ATP6AP1/PDIA4/PRKCB/ATP6V1A/ATP6V1E1/ATP6V1G1/ATP6V1F/ATP6V0D1/ADCY3/ATP6V1C1/ARF1/ATP6V0A1/ATP6V1D/PRKX/SEC61G/ATP6V1B2/PRKCA/KDELR1/ATP6V0A2
GLUTATHIONE METABOLISM	1.98347	0.000152571	GCLC/MGST1/G6PD/SRM/GSTO1/GSR/ANPEP/MGST3/GSS/PGD/GGCT
METABOLISM OF FAT SOLUBLE VITAMINS	1.97587	0.000326073	LPL/GPC4/SDC2/SDC4/APOE/LRP12/VKORC1L1/APOC2
ASSEMBLY OF COLLAGEN FIBRILS AND OTHER MULTIMERIC STRUCTURES	1.95467	0.000522576	MMP9/MMP7/COL6A2/COL6A1/COL8A2/ITGA6/PLEC/CTSB/CTSL/CD151/COL4A2
PPAR SIGNALING PATHWAY	1.93946	0.000436757	LPL/FABP5/FABP4/CYP27A1/CD36/ACADM/PPARG/FABP3/ACSL4/PCK2/DBI/ACOX1/FADS2/NR1H3/SCD/ACSL5/CPT2/PPARD/ACSL3/SLC27A4/GK
ECM RECEPTOR INTERACTION	1.93508	0.000329906	SPP1/SDC2/ITGB5/SDC4/COL6A2/CD36/COL6A1/FN1/ITGA5/ITGB1/CD44/ITGA6
INTEGRIN CS PATHWAY	1.89348	0.00292632	ITGB5/ITGA5/ITGAX/ITGB2/ITGB1/ITGAE/ITGA6
TRANSFERRIN ENDOCYTOSIS AND RECYCLING	1.89272	0.00200009	ATP6V0D2/ATP6V1H/TCIRG1/ATP6AP1/STEAP3/ATP6V1A/TFRC/ATP6V1E1/ATP6V1G1/ATP6V1F/ATP6V0D1/ATP6V1C1/ATP6V0A1/ATP6V1D/ATP6V1B2/ATP6V0A2
INSULIN RECEPTOR RECYCLING	1.8719	0.00304945	ATP6V0D2/ATP6V1H/TCIRG1/ATP6AP1/ATP6V1A/ATP6V1E1/ATP6V1G1/ATP6V1F/ATP6V0D1/ATP6V1C1/ATP6V0A1/ATP6V1D/ATP6V1B2/ATP6V0A2
EXTRACELLULAR MATRIX ORGANIZATION	1.86062	1.88187e-06	SPP1/MMP9/CTSK/MMP7/SDC2/SERPINE1/ITGB5/SDC4/COL6A2/ACTN1/MMP19/COL6A1/FN1/ITGA5/ADAM9/SPARC/COL8A2/P4HB/BSG/ITGAX/PDGFA/ITGB2/ITGB1/HTRA1/EMILIN2/MFAP1/ITGAE/PLOD3/NCSTN/CD44/ITGA6/TIMP2/A2M/TRAPPC4/MMP2/EMILIN1/PLEC/CAPN7/CTSB/CTSL/CAPN1/CD151/F11R/COL4A2
INTEGRIN CELL SURFACE INTERACTIONS	1.84575	0.00154196	SPP1/ITGB5/COL6A2/COL6A1/FN1/ITGA5/COL8A2/BSG/ITGAX/ITGB2/ITGB1/ITGAE/CD44/ITGA6
COLLAGEN FORMATION	1.83745	0.00331157	MMP9/MMP7/COL6A2/COL6A1/COL8A2/P4HB/PLOD3/ITGA6/PLEC/CTSB/CTSL/CD151/COL4A2
COPI DEPENDENT GOLGI TO ER RETROGRADE TRAFFIC	1.82874	0.000982439	KIF1B/TMED3/TUBA1C/TUBB6/RAB1A/ARFGAP3/TMED10/COPB1/KIF2A/TMED9/COPG1/COPB2/KIF16B/KIF22/ARF4/NSF/COPZ1/SURF4/ARF1/COPE/STX18/KIF3B/KDELR1/TMED2/ARFGAP1/TUBB4B/NBAS/ARCN1/RAB1B
SYNDECAN 1 PATHWAY	1.81307	0.00888002	MMP9/MMP7/COL6A2/COL6A1/COL8A2/BSG
GLUTATHIONE CONJUGATION	1.80619	0.00654818	GCLC/MGST1/GSTO1/MGST3/GSS/GGCT/HPGDS
OXIDATIVE PHOSPHORYLATION	1.80438	0.000307087	ATP6V0D2/ATP6V1H/NDUFS3/TCIRG1/NDUFB6/ATP6AP1/NDUFS1/ATP6V1A/ATP6V1E1/ATP6V1G1/UQCRFS1/ATP6V1F/NDUFS5/UQCRC1/NDUFAB1/SDHD/SDHA/NDUFB9/ATP6V0D1/NDUFB4/NDUFA5/NDUFV1/NDUFA8/ATP6V1C1/COX17/ATP6V0A1/ATP6V1D/NDUFA9/COX5B/NDUFB7/UQCRH/UQCRQ/ATP6V1B2/CYC1/NDUFA4/COX6A1/COX5A/NDUFA3/COX6C/ATP6V0A2/NDUFB2
BASIGIN INTERACTIONS	1.80357	0.0102394	SLC16A3/BSG/ITGB1/SPN/ITGA6/SLC16A1/SLC3A2/ATP1B1/ATP1B3/SLC7A8/SLC7A11
VISUAL PHOTOTRANSDUCTION	1.80356	0.00405411	LPL/GPC4/SDC2/SDC4/APOE/LRP12/APOC2/DHRS9/METAP2
GLYCOLYSIS GLUCONEOGENESIS	1.79869	0.00406037	FBP1/PFKP/GALM/PKM/PGAM1/PCK2/DLD/ENO1/HK1/HK3/ENO2/HK2/PGK1/LDHA/ADH5/ALDH3B1/TPI1/PFKL/PDHB/PDHA1/ACSS2/ALDOA/ALDH1B1/DLAT/ALDH3A2/ALDH9A1/PGM2/GPI
SIGNALING BY INSULIN RECEPTOR	1.76751	0.00710657	ATP6V0D2/HRAS/ATP6V1H/TCIRG1/ATP6AP1/NRAS/ATP6V1A/AKT2/ATP6V1E1/ATP6V1G1/ATP6V1F/THEM4/ATP6V0D1/PIK3CB/ATP6V1C1/ATP6V0A1/ATP6V1D/MAPK1/ATP6V1B2/PIK3C3/MAPK3/ATP6V0A2/PIK3CA
ECM PROTEOGLYCANS	1.75848	0.00888002	SERPINE1/ITGB5/COL6A2/COL6A1/FN1/SPARC/ITGAX/ITGB1
UPA UPAR PATHWAY	1.75637	0.0180755	MMP9/SERPINE1/ITGB5/FN1/ITGA5/ITGB2/ITGB1
REGULATION OF RAS BY GAPS	1.72915	0.00607609	HRAS/RASAL2/PSMD14/PSMD2/RASA1/PSMB2/PSMB5/NRAS/PSMC1/RASA3/NF1/PSMD8/SPRED1/PSMA7/PSMD6/PSME3/PSMD4/PSMA4/PSMD7/PSMA1/PSMC3/PSMC2/PSMD1/PSMC5/RBX1/PSMD9/PSMB6/PSMA5
ACTIVATION OF MATRIX METALLOPROTEINASES	1.72535	0.0301286	MMP9/CTSK/MMP7
ELASTIC FIBRE FORMATION	1.72115	0.0286989	ITGB5/FN1/ITGA5/ITGB1/EMILIN2/MFAP1
HEDGEHOG LIGAND BIOGENESIS	1.71463	0.0089634	PSMD14/P4HB/PSMD2/PSMB2/PSMB5/PSMC1/PSMD8/SEL1L/DERL2/VCP/PSMA7/PSMD6/PSME3/PSMD4/PSMA4/PSMD7/PSMA1/PSMC3/PSMC2/PSMD1/PSMC5/ERLEC1/PSMD9/PSMB6/PSMA5/SYVN1/PSMB3/PSMD13/PSMD3/PSMD12/PSMD10
COPI MEDIATED ANTEROGRADE TRANSPORT	1.68953	0.00546683	TMED3/TUBA1C/TUBB6/RAB1A/ARFGAP3/TMED10/COPB1/BET1/TMED9/COPG1/DYNC1I2/COPB2/USO1/ARF4/NSF/SPTBN1/COG2/COPZ1/YKT6/CAPZA1/ARF1/DCTN2/GOSR1/COG3/COPE/ACTR1A/KDELR1/TMED2/ACTR10/GOLGA2/STX5/DCTN1/ARFGAP1/DCTN3/TUBB4B/ARCN1/RAB1B
PLASMA LIPOPROTEIN REMODELING	1.68793	0.0385713	LPL/APOE/P4HB/APOC2
TRIGLYCERIDE CATABOLISM	1.68566	0.037566	FABP5/FABP4/MGLL/FABP3
PROTEASOME	1.68446	0.0274653	PSMD14/PSMD2/PSMB2/PSMB5/PSMC1/PSMD8/PSMA7/PSMD6/PSME3/PSMD4/PSMA4/PSMD7/PSMA1/PSMC3/PSMC2/PSMD1/PSMC5/PSMB6/PSMA5/PSMB3/PSMD13/PSMD3/PSMD12/PSMD11
SYNDECAN 2 PATHWAY	1.68108	0.0402233	SDC2/FN1/ITGA5/HRAS/RASA1/ITGB1/NF1/TRAPPC4/MMP2
BIOCARTA ECM PATHWAY	1.68101	0.0342819	GSN/HRAS/ITGB1/FYN/RAF1/TLN1/MAPK1/MAPK3/ROCK1/PIK3CG/PIK3CA/DIAPH1
LYSOSOME	1.68019	0.00331157	CTSK/ATP6V0D2/SCARB2/GM2A/ATP6V1H/SORT1/CD164/ACP5/LIPA/SLC17A5/TCIRG1/IGF2R/GUSB/ATP6AP1/LAMP1/SMPD1/HEXB/GGA1/GALNS/AP1S3/ATP6V0D1/GGA3/AP3S1/GNPTG/PPT1/CD63/SGSH/CLN5/CTSB/CTSL/ATP6V0A1/SLC11A2/CTSH/ATP6V0A2/CTSA/AP3M1/HGSNAT/LAPTM4A/CTSZ/GBA/NAGLU/GLA/GNS/AP4S1/LAMP2/MAN2B1/AP1S1
DEGRADATION OF GLI1 BY THE PROTEASOME	1.67803	0.016352	NUMB/PSMD14/PSMD2/PSMB2/PSMB5/PSMC1/PSMD8/PSMA7/PSMD6/PSME3/PSMD4/PSMA4/PSMD7/PSMA1/PSMC3/PSMC2/PSMD1/PSMC5/RBX1/PSMD9/BTRC/PSMB6/PSMA5/ITCH/PSMB3/PSMD13/PSMD3/PRKACA/PSMD12/PSMD10
FGF PATHWAY	1.6717	0.0444109	SPP1/MMP9/SDC2/RPS6KA1/SPRY2
BIOSYNTHESIS OF UNSATURATED FATTY ACIDS	1.67135	0.0456427	ACOX1/FADS2/ACOT7/SCD/ACOT2/TECR/ELOVL5
BIOCARTA EDG1 PATHWAY	1.65074	0.0402233	PDGFA/SMPD1/PRKCB/SPHK1/MAPK1/PRKCA/MAPK3/PIK3CG/PIK3CA/SMPD2
DEFECTIVE CFTR CAUSES CYSTIC FIBROSIS	1.65039	0.0217945	PSMD14/PSMD2/PSMB2/PSMB5/PSMC1/PSMD8/SEL1L/DERL2/DERL1/VCP/PSMA7/PSMD6/PSME3/PSMD4/PSMA4/PSMD7/PSMA1/PSMC3/PSMC2/PSMD1/PSMC5/ERLEC1/PSMD9/PSMB6/PSMA5/PSMB3/PSMD13/PSMD3/PSMD12/PSMD10
GLUCOSE METABOLISM	1.64696	0.0174407	FBP1/PFKP/PC/PKM/PGAM1/PCK2/PGP/MDH1/ENO1/POM121C/HK1/PPP2CB/HK3/ENO2/NUP88/HK2/PGK1/SLC37A2/NUP188/SEH1L/TPI1/SLC25A13/NUP98/PFKL/SEC13/POM121/G6PC3/PPP2R1A/GOT2/PRKACA/NDC1/SLC25A1/NUP50/ALDOA/NUP153/SLC25A12/NUP210/PRKACB/NUP85/GPI/PPP2R1B/NUP54
FAK PATHWAY	1.64344	0.0226978	ITGB5/ACTN1/ASAP1/ITGA5/CCND1/RASA1/RRAS/ITGB1/FYN/RAF1/SH3GL1/ETS1/WASL/RAP1B/TLN1/MAPK1/PIK3CA/MAPK9
SENSORY PERCEPTION	1.64142	0.0104217	LPL/GPC4/SDC2/GSN/SDC4/CDH23/APOE/RDX/EPB41L1/LRP12/APOC2/DHRS9/MYO1C/METAP2/SPTBN1/ADCY3/DHRS3/CAPZA1/EPS8
AMINO ACID TRANSPORT ACROSS THE PLASMA MEMBRANE	1.6401	0.0462957	SLC1A4/SLC16A10/SLC25A29/SLC6A6/SLC7A1/SLC3A2/SLC7A8/SLC7A11
AMINO ACIDS REGULATE MTORC1	1.63429	0.0286989	ATP6V0D2/FNIP2/ATP6V1H/RHEB/TCIRG1/ATP6V1A/ATP6V1E1/ATP6V1G1/ATP6V1F/RRAGD/RRAGB/ATP6V0D1/ATP6V1C1/SEH1L/ATP6V1D/ATP6V1B2/SEC13/SLC38A9
MITOCHONDRIAL PROTEIN IMPORT	1.62675	0.0285966	TOMM40/TIMM8B/TIMM10/VDAC1/ACO2/HSPA9/TIMM17A/CHCHD5/TIMM22/CHCHD3/CS/GRPEL1/COX17/TOMM5/CHCHD10/COA4/SLC25A13/TIMM50/CYC1/CHCHD4/PMPCA/TOMM20/HSPD1/TIMM8A/TOMM22/COA6/PMPCB/GRPEL2/SLC25A12/SAMM50/TIMM44/MTX2/MTX1
TRANSPORT OF SMALL MOLECULES	1.62454	3.80601e-07	LPL/SLC1A4/SLC29A3/ATP6V0D2/NCEH1/APOC1/TRPV2/ATP2B4/APOE/ABCC3/ATP6V1H/PRKAR1B/PSMD14/LIPA/SLC17A5/TCIRG1/SLC16A10/ATP1A1/SLC16A3/SLC25A29/SLC44A2/VDAC1/ATP13A1/ATP6AP1/P4HB/BSG/MICU1/PSMD2/MCOLN3/PSMB2/SLC2A1/STEAP3/MCU/SLC8B1/APOBR/MAGT1/APOC2/SLC12A6/SLC6A6/SLC1A3/PSMB5/HDLBP/TPCN2/CA2/AQP9/PDZD11/ATP6V1A/STOML2/PSMC1/SLC41A2/TFRC/ATP6V1E1/SLC9A7/ABCB8/PHB/PSMD8/ACO1/GLRX3/ATP6V1G1/SLC7A1/LET…
MITOCHONDRIAL TRANSLATION	1.62362	0.017695	MRPS10/MRPL44/MRPL32/MRPS6/MRPS18B/MRPL49/MRPS12/MRPL17/MRPL11/MRPL23/MRPL13/TSFM/MRPL21/MRPS22/MRPL12/MRPL54/MRPS25/MRPL18/TUFM/MRPL47/MRPS30/MRPS15/MRPL51/MRPL55/GFM2/MRPL33/MRPL4/MRPS14/MRPS18A/MRPL20/MRPL22/DAP3/MRPL41/CHCHD1/MRPS28/MRPL19/MRPL2/GADD45GIP1/MRPS36/MRPL37/MRPL52/MRPL24/MRPS5/MRPS26/MRPL1/MRPL27/MRPL14/MRPS23/MRPL40/MRPL42/AURKAIP1/MRPS9
METABOLISM OF POLYAMINES	1.62173	0.0252074	SRM/PSMD14/PSMD2/PSMB2/PSMB5/PSMC1/PSMD8/PSMA7/PSMD6/PSME3/PSMD4/NQO1/PSMA4/PSMD7/PSMA1/PSMC3/PSMC2/PSMD1/PSMC5/PSMD9/PSMB6/PSMA5/PSMB3/PSMD13/PSMD3/PSMD12/PSMD10/OAZ2/PSMD11
GOLGI TO ER RETROGRADE TRANSPORT	1.61919	0.017695	KIF1B/TMED3/TUBA1C/TUBB6/RAB1A/ARFGAP3/TMED10/COPB1/KIF2A/TMED9/COPG1/DYNC1I2/COPB2/KIF16B/KIF22/ARF4/NSF/COPZ1/CAPZA1/SURF4/BICD1/ARF1/DCTN2/GALNT1/COPE/STX18/KIF3B/ACTR1A/KDELR1/TMED2/ACTR10/RAB3GAP1/DCTN1/ARFGAP1/DCTN3/TUBB4B/NBAS/ARCN1/RAB1B
CELL JUNCTION ORGANIZATION	1.60444	0.0402233	ACTN1/LIMS1/CADM1/FLNA/ITGB1/FERMT2/ITGA6/CLDN23/PLEC/CD151/F11R
DECTIN 1 MEDIATED NONCANONICAL NF KB SIGNALING	1.60339	0.0343045	CCL22/PSMD14/PSMD2/PSMB2/PSMB5/PSMC1/PSMD8/UBE2M/PSMA7/PSMD6/PSME3/PSMD4/PSMA4/PSMD7/PSMA1/PSMC3/PSMC2/PSMD1/PSMC5/PSMD9/BTRC/PSMB6/PSMA5/PSMB3/PSMD13/PSMD3/PSMD12/PSMD10/PSMD11/CHUK
REGULATION OF RUNX2 EXPRESSION AND ACTIVITY	1.60312	0.0272966	PSMD14/PSMD2/PSMB2/PSMB5/PSMC1/PSMD8/PSMA7/PSMD6/PSME3/PSMD4/PSMA4/PSMD7/PSMA1/STUB1/PSMC3/PSMC2/PSMD1/PSMC5/RBX1/GSK3B/PSMD9/PSMB6/PSMA5/HIVEP3/PSMB3/ESRRA/NR3C1/PSMD13/FBXW7/PSMD3/PSMD12/PSMD10
ASPARAGINE N LINKED GLYCOSYLATION	1.59253	0.000261798	SRD5A3/TRAPPC2L/SLC17A5/TMED3/MAN1A1/TUBA1C/TUBB6/RPN1/ANKRD28/ST3GAL5/ALG8/ST6GALNAC4/RAB1A/ARFGAP3/CNIH1/TMED10/MAGT1/COPB1/AMFR/LMAN1/BET1/ALG5/NPL/PSMC1/TMED9/RPN2/ST3GAL2/COPG1/CALR/DYNC1I2/COPB2/PPP6R3/SEL1L/DPM2/PRKCSH/FUOM/USO1/DAD1/ARF4/DERL2/NSF/DERL1/SPTBN1/VCP/COG2/TRAPPC3/MAN1B1/TFG/TRAPPC4/COPZ1/ALG14/YKT6/CAPZA1/GANAB/MCFD2/DDOST/CMAS/GMPPA/ST6GAL1/MPDU1/ALG6/ST3GAL6/ARF1/NUS1/B4GA…
SIGNALING BY HEDGEHOG	1.58756	0.0171493	NUMB/PRKAR1B/PSMD14/TUBA1C/TUBB6/P4HB/PSMD2/PSMB2/PSMB5/PSMC1/PSMD8/SEL1L/DERL2/VCP/PSMA7/ADCY3/PSMD6/PSME3/PSMD4/PSMA4/PSMD7/PSMA1/PSMC3/PSMC2/PSMD1/PSMC5/ERLEC1/RBX1/GSK3B/PSMD9/BTRC/PSMB6/PSMA5/SYVN1/ITCH/PSMB3/TUBB4B/PSMD13/PSMD3/PRKACA/MKS1/PSMD12/PSMD10/IFT88/PSMD11/IFT122
REGULATION OF HMOX1 EXPRESSION AND ACTIVITY	1.58722	0.0402233	HM13/PSMD14/PSMD2/PSMB2/PSMB5/PSMC1/PSMD8/KEAP1/PSMA7/PSMD6/PSME3/PSMD4/CSNK2A1/PSMA4/PSMD7/PSMA1/PSMC3/PSMC2/PSMD1/PSMC5/RBX1/PSMD9/PSMB6/PSMA5/PSMB3/PSMD13/CSNK2B/PSMD3/PSMD12/PSMD10
ABC TRANSPORTER DISORDERS	1.58682	0.0400738	PSMD14/PSMD2/PSMB2/PSMB5/PSMC1/PSMD8/SEL1L/DERL2/DERL1/VCP/PSMA7/PSMD6/PSME3/PSMD4/PSMA4/PSMD7/PSMA1/PSMC3/PSMC2/PSMD1/PSMC5/ERLEC1/PSMD9/PSMB6/PSMA5
MYC ACTIV PATHWAY	1.5861	0.0285966	MMP9/BCAT1/NME1/PIM1/EIF4E/SLC2A1/ENO1/PDCD10/TK1/TFRC/PRDX3/CCND2/RUVBL2/MYC/HMGA1/TAF10/NDUFAF2/ID2/EIF4G1/BMI1/LDHA/CDK4/EIF2S1/CAD
DEGRADATION OF DVL	1.58367	0.0474518	PSMD14/PSMD2/PSMB2/PSMB5/PSMC1/PSMD8/PSMA7/PSMD6/PSME3/PSMD4/PSMA4/PSMD7/PSMA1/PSMC3/PSMC2/PSMD1/PSMC5/RBX1/PSMD9/PSMB6/PSMA5/PSMB3/PSMD13/PSMD3/KLHL12/PSMD12/PSMD10
HEDGEHOG OFF STATE	1.58194	0.017695	NUMB/PRKAR1B/PSMD14/TUBA1C/TUBB6/PSMD2/PSMB2/PSMB5/PSMC1/PSMD8/PSMA7/ADCY3/PSMD6/PSME3/PSMD4/PSMA4/PSMD7/PSMA1/PSMC3/PSMC2/PSMD1/PSMC5/RBX1/GSK3B/PSMD9/BTRC/PSMB6/PSMA5/ITCH/PSMB3/TUBB4B/PSMD13/PSMD3/PRKACA/MKS1/PSMD12/PSMD10/IFT88/PSMD11/IFT122
ORC1 REMOVAL FROM CHROMATIN	1.57217	0.0342819	PSMD14/PSMD2/PSMB2/PSMB5/PSMC1/PSMD8/PSMA7/PSMD6/PSME3/PSMD4/PSMA4/PSMD7/PSMA1/PSMC3/PSMC2/PSMD1/PSMC5/RBX1/PSMD9/PSMB6/PSMA5/ORC3/MCM5/PSMB3/PSMD13/PSMD3/MCM4/MCM3/PSMD12/PSMD10
ALZHEIMERS DISEASE	1.57215	0.0127105	LPL/APOE/NDUFS3/CALM3/NDUFB6/PSEN2/BID/NDUFS1/PPP3CC/MME/UQCRFS1/NDUFS5/UQCRC1/NCSTN/NDUFAB1/SDHD/SDHA/NDUFB9/NDUFB4/NDUFA5/NDUFV1/PPP3CA/NDUFA8/BACE1/CAPN1/GSK3B/CDK5/ATP2A2/NDUFA9/COX5B/MAPK1/NDUFB7/UQCRH/UQCRQ/CYC1/NDUFA4/COX6A1/MAPK3/COX5A/NDUFA3/COX6C/NDUFB2/NAE1/ATF6/NDUFS2/FADD/NDUFB3/NDUFV2/PPP3CB/SDHC/COX7A2/CASP7/CASP9/SDHB/CAPN2/LRP1/COX7B/ITPR1/NDUFC2
THE CITRIC ACID TCA CYCLE AND RESPIRATORY ELECTRON TRANSPORT	1.57037	0.00535502	NDUFS3/SLC16A3/VDAC1/NDUFB6/ACO2/BSG/DLD/ME2/NDUFS1/MPC2/TRAP1/COX20/UQCRFS1/NDUFS5/IDH3A/UQCRC1/NDUFAB1/SDHD/SDHA/NDUFB9/DLST/NDUFB4/SLC16A1/CS/NDUFA5/NDUFV1/NDUFAF2/PPARD/NDUFA8/COX14/ME3/LDHA/COA1/GLO1/NDUFA13/NDUFA9/COX5B/NDUFB7/UQCRH/UQCRQ/CYC1/NDUFA4/TACO1/COX6A1/PDHB/COX5A/NDUFB11/NDUFA3/COX6C/NDUFAF4/NDUFB2/COX16/IDH3B/OGDH/PDHA1/PDHX/NDUFS2/PDP1/NDUFB3/NDUFV2/FAHD1/SDHC/MPC1/ETFDH/SDHB/N…
REGULATION OF RUNX3 EXPRESSION AND ACTIVITY	1.56957	0.0465905	PSMD14/PSMD2/PSMB2/PSMB5/PSMC1/PSMD8/PSMA7/PSMD6/PSME3/PSMD4/PSMA4/PSMD7/PSMA1/PSMC3/PSMC2/PSMD1/PSMC5/PSMD9/PSMB6/PSMA5/PSMB3/PSMD13/PSMD3/MDM2/EP300/PSMD12/PSMD10/PSMD11/CDKN2A/SRC
RESPIRATORY ELECTRON TRANSPORT	1.56729	0.0251393	NDUFS3/NDUFB6/NDUFS1/TRAP1/COX20/UQCRFS1/NDUFS5/UQCRC1/NDUFAB1/SDHD/SDHA/NDUFB9/NDUFB4/NDUFA5/NDUFV1/NDUFAF2/NDUFA8/COX14/COA1/NDUFA13/NDUFA9/COX5B/NDUFB7/UQCRH/UQCRQ/CYC1/NDUFA4/TACO1/COX6A1/COX5A/NDUFB11/NDUFA3/COX6C/NDUFAF4/NDUFB2/COX16/NDUFS2/NDUFB3/NDUFV2/SDHC/ETFDH/SDHB/NDUFAF6/COX7B/LRPPRC/TMEM186/NDUFC2
UCH PROTEINASES	1.56705	0.0296305	PSMD14/PSMD2/PSMB2/PSMB5/PSMC1/UCHL5/PSMD8/PSMA7/PSMD6/PSME3/PSMD4/TFPT/FOXK2/PSMA4/PSMD7/PSMA1/PSMC3/PSMC2/PSMD1/PSMC5/PSMD9/BAP1/UCHL1/PSMB6/PSMA5/INO80D/TGFBR1/ASXL1/ACTL6A/ASXL2/ADRM1/PSMB3/PSMD13/PSMD3/NEDD8/PSMD12/PSMD10/SMAD7/INO80/PSMD11
ION CHANNEL TRANSPORT	1.55689	0.0301286	ATP6V0D2/TRPV2/ATP2B4/ATP6V1H/TCIRG1/ATP1A1/ATP13A1/ATP6AP1/MCOLN3/TPCN2/PDZD11/ATP6V1A/ATP6V1E1/ATP6V1G1/ATP6V1F/ATP6V0D1/ATP11C/RAF1/RYR1/ATP2C1/ATP1B1/ATP1B3/ASPH/ATP6V1C1/ATP11B/ATP6V0A1/ATP6V1D/ATP2A2/ATP11A/ATP7A/CLCN3/ATP6V1B2/FXYD1/ATP9B/ATP6V0A2
RESPIRATORY ELECTRON TRANSPORT ATP SYNTHESIS BY CHEMIOSMOTIC COUPLING AND HEAT PRODUCTION BY UNCOUPLING PROTEINS	1.55681	0.017695	NDUFS3/NDUFB6/NDUFS1/TRAP1/COX20/UQCRFS1/NDUFS5/UQCRC1/NDUFAB1/SDHD/SDHA/NDUFB9/NDUFB4/NDUFA5/NDUFV1/NDUFAF2/NDUFA8/COX14/COA1/NDUFA13/NDUFA9/COX5B/NDUFB7/UQCRH/UQCRQ/CYC1/NDUFA4/TACO1/COX6A1/COX5A/NDUFB11/NDUFA3/COX6C/NDUFAF4/NDUFB2/COX16/NDUFS2/NDUFB3/NDUFV2/SDHC/ETFDH/SDHB/NDUFAF6/COX7B/LRPPRC/TMEM186/NDUFC2
DISORDERS OF TRANSMEMBRANE TRANSPORTERS	1.55045	0.017695	SLC29A3/PSMD14/SLC17A5/BSG/PSMD2/PSMB2/SLC2A1/SLC12A6/SLC1A3/PSMB5/POM121C/PSMC1/HK1/PSMD8/SEL1L/NUP88/DERL2/DERL1/VCP/PSMA7/SLC26A2/PSMD6/PSME3/PSMD4/SLC16A1/NUP188/PSMA4/PSMD7/SLC3A2/PSMA1/PSMC3/PSMC2/PSMD1/PSMC5/ERLEC1/SEH1L/SLC39A4/PSMD9/SLC11A2/SLC27A4/PSMB6/PSMA5/NUP98
DNA REPLICATION PRE INITIATION	1.54991	0.0385713	PSMD14/PSMD2/PSMB2/PSMB5/PSMC1/PSMD8/GMNN/PSMA7/RPA3/PSMD6/PSME3/PSMD4/KPNA6/PSMA4/PSMD7/PSMA1/PSMC3/PSMC2/PSMD1/PSMC5/PSMD9/DBF4/PSMB6/PSMA5/ORC3/MCM5/PSMB3/PRIM2/PSMD13/PSMD3/MCM4/E2F1/MCM3/PSMD12/PSMD10/RPA1/KPNB1
TIGHT JUNCTION	1.54745	0.0402233	MRAS/ACTN1/HRAS/EPB41L2/MYL9/EPB41L1/RAB13/RRAS/PRKCB/NRAS/AKT2/EXOC4/PPP2CB/CLDN23/CSNK2A1/PPP2R2D/ACTN4/CDK4/F11R/MYL12B/PRKCA/CTTN/MYH9/PPP2R1A/CSNK2B
ER TO GOLGI ANTEROGRADE TRANSPORT	1.54719	0.017695	TRAPPC2L/TMED3/TUBA1C/TUBB6/ANKRD28/RAB1A/ARFGAP3/CNIH1/TMED10/COPB1/LMAN1/BET1/TMED9/COPG1/DYNC1I2/COPB2/PPP6R3/USO1/ARF4/NSF/SPTBN1/COG2/TRAPPC3/TFG/TRAPPC4/COPZ1/YKT6/CAPZA1/MCFD2/ARF1/DCTN2/LMAN2/GOSR1/CNIH3/COG3/COPE/SEC22A/MIA3/ACTR1A/KDELR1/TMED2/TRAPPC6B/F8/ACTR10/SEC13/GOLGA2/STX5/DCTN1/ARFGAP1/CTSZ/DCTN3/TUBB4B/SEC24B/ARCN1/RAB1B
G2 M CHECKPOINTS	1.52857	0.028457	PSMD14/YWHAQ/PSMD2/PSMB2/BRCC3/PSMB5/PSMC1/PSMD8/RFC2/PSMA7/RPA3/YWHAG/PSMD6/PSME3/PSMD4/PSMA4/PSMD7/PSMA1/PSMC3/PSMC2/PSMD1/PSMC5/PSMD9/DBF4/WEE1/PSMB6/PSMA5/BRCA1/UIMC1/ORC3/MCM5/PSMB3/CHEK2/WRN/PSMD13/PSMD3/MCM4/BABAM1/RAD17/RMI2/MCM3/PSMD12/PSMD10/RPA1/UBE2N/PSMD11/RFC4/YWHAZ/UBE2V2/NBN/TOPBP1/CLSPN/HERC2/YWHAE/PSMB1/RAD9A/PSMB7/PSMA3/SUMO1/PSME4/MCM8/MCM2/ORC5/PSMB8/CCNB1/ORC6/PSMC6
FOCAL ADHESION	1.52017	0.017695	SPP1/ITGB5/RAC2/COL6A2/ACTN1/COL6A1/FN1/ITGA5/CCND1/HRAS/FLNA/MYL9/PDGFA/ITGB1/FLT1/PRKCB/AKT2/ZYX/CCND2/FYN/XIAP/ITGA6/TLN2/RAF1/PIK3CB/ACTN4/RAP1B/VEGFB/TLN1/GSK3B/COL4A2/IGF1R/MYL12B/MAPK1/PRKCA/FLNB/MAPK3/ROCK1/PIK3CG/PIK3CA/DIAPH1/PDGFB/MAPK9
REGULATION OF ACTIN CYTOSKELETON	1.51053	0.0176816	SCIN/GSN/MRAS/ITGB5/RAC2/ACTN1/FN1/ITGA5/HRAS/RDX/MYL9/ITGAX/PDGFA/RRAS/ITGB2/ITGB1/TIAM1/NRAS/ITGAE/LIMK1/ITGA6/RAF1/PIK3CB/ACTN4/WASL/PIKFYVE/ARPC4/MYL12B/CYFIP1/MAPK1/WASF2/MAPK3/ROCK1/MYH9/PIK3CG/PIK3CA/DIAPH1/PDGFB/PIP4K2A/BAIAP2
INTRA GOLGI AND RETROGRADE GOLGI TO ER TRAFFIC	1.50892	0.0177786	KIF1B/TMED3/MAN1A1/TUBA1C/IGF2R/TUBB6/RAB1A/ARFGAP3/TMED10/COPB1/KIF2A/TMED9/ARL1/COPG1/DYNC1I2/COPB2/KIF16B/KIF22/ARF4/GOLIM4/NSF/SCOC/COG2/COPZ1/CYTH4/YKT6/CAPZA1/SURF4/BICD1/ARF1/DCTN2/GOSR1/COG3/VPS51/GALNT1/COPE/CYTH1/STX18/PLIN3/KIF3B/ACTR1A/KDELR1/TMED2/ACTR10/RAB3GAP1/TGOLN2/STX5/DCTN1/ARFGAP1/DCTN3/NAA30/SNAP29/TUBB4B/CYTH3/NBAS/ARCN1/RAB1B
DNA REPLICATION	1.49747	0.0286989	PSMD14/PSMD2/PSMB2/PSMB5/PSMC1/PSMD8/GMNN/RFC2/POLD2/PSMA7/RPA3/PSMD6/PSME3/PSMD4/KPNA6/PSMA4/POLD4/UBE2S/PSMD7/PSMA1/PSMC3/PSMC2/PSMD1/PSMC5/RBX1/PSMD9/DBF4/PSMB6/PSMA5/GINS2/ORC3/MCM5/PSMB3/FEN1/POLD1/PRIM2/CDC23/PSMD13/PSMD3/MCM4/E2F1/MCM3/PSMD12/PSMD10/RPA1/KPNB1/ANAPC4/PSMD11/RFC4/POLD3/POLA1/POLE3/PSMB1/PSMB7/PSMA3/PSME4/POLA2/MCM8/ANAPC15/MCM2/ORC5/UBE2E1/PSMB8/ORC6/PSMC6/PSMC4/FZR1/RFC5/M…
HUNTINGTONS DISEASE	1.49235	0.0252074	TGM2/PPARG/NDUFS3/VDAC1/NDUFB6/NDUFS1/CREB3/POLR2L/UQCRFS1/NDUFS5/UQCRC1/NDUFAB1/CREB3L2/SDHD/SDHA/NDUFB9/NDUFB4/POLR2H/NDUFA5/NDUFV1/AP2S1/NDUFA8/RCOR1/DCTN2/POLR2G/VDAC2/SOD1/NDUFA9/COX5B/NDUFB7/UQCRH/UQCRQ/CYC1/NDUFA4/COX6A1/COX5A/NDUFA3/COX6C/NDUFB2/POLR2E/POLR2J/DCTN1/POLR2K/POLR2C/NDUFS2/EP300/NDUFB3/NDUFV2/SDHC/DCTN4/POLR2J2/COX7A2/CASP9/SDHB/CLTC/COX7B/ITPR1/NDUFC2
TRANSPORT TO THE GOLGI AND SUBSEQUENT MODIFICATION	1.49221	0.0215924	TRAPPC2L/TMED3/MAN1A1/TUBA1C/TUBB6/ANKRD28/RAB1A/ARFGAP3/CNIH1/TMED10/COPB1/LMAN1/BET1/TMED9/COPG1/DYNC1I2/COPB2/PPP6R3/USO1/ARF4/NSF/SPTBN1/COG2/TRAPPC3/TFG/TRAPPC4/COPZ1/YKT6/CAPZA1/MCFD2/ST6GAL1/ARF1/B4GALT1/DCTN2/LMAN2/MANEA/GOSR1/CNIH3/COG3/B4GALT5/COPE/SEC22A/MIA3/ACTR1A/KDELR1/TMED2/TRAPPC6B/F8/ACTR10/SEC13/GOLGA2/STX5/DCTN1/ARFGAP1/CTSZ/B4GALT2/DCTN3/TUBB4B/SEC24B/ARCN1/RAB1B/CD59/MGAT4B/…
METABOLISM OF VITAMINS AND COFACTORS	1.45858	0.0395286	LPL/GPC4/SDC2/MTHFS/SDC4/CYB5A/PDXK/PC/APOE/ACP5/CYB5R3/GSTO1/LRP12/SLC2A1/MTHFD2/VKORC1L1/APOC2/SLC52A2/PDZD11/TPK1/PTS/MMAB/PDSS1/PCCA/MTHFD1/VKORC1/PANK3/VNN1/DHFR/MTHFD1L/ABCC1/PARP6/SLC23A2
NEDDYLATION	1.4227	0.0342819	SPSB1/PSMD14/NUB1/PSMD2/PSMB2/COPS7A/CUL2/PSMB5/KCTD7/PSMC1/FBXW5/PSMD8/COMMD2/KEAP1/DCAF13/ASB1/FBXL20/RNF7/UBE2M/PSMA7/PSMD6/PSME3/PSMD4/PSMA4/CAND1/FBXL3/FEM1B/PSMD7/COMMD8/DCUN1D4/COMMD1/PSMA1/PSMC3/FBXL15/KBTBD8/PSMC2/PSMD1/PSMC5/RBX1/PSMD9/DDB2/RBBP7/BTRC/DCUN1D5/UBXN7/PSMB6/PSMA5/FBXO31/PSMB3/ASB3/DCAF6/NAE1/PSMD13/FBXW7/PSMD3/FBXO22/FBXO32/TULP4/COPS7B/NEDD8/PSMD12/WDTC1/PSMD10/DCAF10/UBE…
M PHASE	1.39884	0.0176816	PSMD14/TUBA1C/TUBB6/RAB1A/PSMD2/NEK6/PSMB2/PSMB5/PRKCB/LMNA/POM121C/PSMC1/NUDC/MAPRE1/KIF2A/PSMD8/PPP2CB/RAB2A/DYNC1I2/USO1/UBE2I/NUP88/SSNA1/ARPP19/PTTG1/PSMA7/RAN/YWHAG/PSMD6/PSME3/PSMD4/CSNK2A1/NUP188/CEP41/PSMA4/PPP2R2D/UBE2S/CENPN/PSMD7/BLZF1/HAUS8/PSMA1/PSMC3/CENPH/MAU2/PSMC2/PSMD1/CEP290/PSMC5/SEH1L/PSMD9/NUMA1/DCTN2/SMC4/SMC1A/MZT1/GORASP2/PSMB6/PSMA5/RAD21/MAPK1/NUP98/NDEL1/XPO1/ZWINT/PR…
METABOLISM OF LIPIDS	1.37983	0.00331157	HSD3B7/FDX1/FABP5/FABP4/MGLL/CYP27A1/PCYT1A/GM2A/CD36/ACADM/SRD5A3/TXNRD1/ABCC3/MSMO1/PPARG/FABP3/VAC14/ALAS1/DHCR24/PNPLA6/SLC44A2/ACSL4/ESYT2/HSD11B1/DBI/SMPD1/HMGCR/PTGDS/ACOX1/POMC/HEXB/FADS2/ACOT7/SREBF2/ACAT2/OSBPL8/PLD3/TBL1XR1/ACBD6/CDK19/UGCG/PLBD1/PI4K2A/MTMR14/PRKAG2/MED15/UBE2I/NDUFAB1/CEPT1/SPHK1/THEM4/GPS2/PI4KA/RAB14/HPGDS/PEMT/NR1H3/SQLE/SLC25A17/PCCA/MFSD2A/LSS/AGPAT2/MED8/RAN/FA…
MITOTIC METAPHASE AND ANAPHASE	1.37468	0.0416551	PSMD14/TUBA1C/TUBB6/PSMD2/PSMB2/PSMB5/LMNA/PSMC1/NUDC/MAPRE1/KIF2A/PSMD8/PPP2CB/DYNC1I2/UBE2I/PTTG1/PSMA7/RAN/PSMD6/PSME3/PSMD4/NUP188/PSMA4/UBE2S/CENPN/PSMD7/PSMA1/PSMC3/CENPH/PSMC2/PSMD1/PSMC5/SEH1L/PSMD9/SMC1A/PSMB6/PSMA5/RAD21/NUP98/NDEL1/XPO1/ZWINT/MAD1L1/PSMB3/SEC13/POM121/ANKLE2/CDC23/PPP2R1A/CENPK/TUBB4B/CKAP5/PSMD13/PSMD3/PSMD12/PSMD10/KPNB1/PDS5A/ANAPC4/PPP2R5A/NDC1/PSMD11/LEMD2/LBR/SMC…
HEMOSTASIS	1.35536	0.0150237	TIMP3/CD109/SDC2/HMG20B/SERPINE1/MGLL/CD9/RAC2/CALU/SDC4/FGR/ACTN1/CD36/FN1/ITGA5/LHFPL2/ATP2B4/HRAS/PRKAR1B/FERMT3/SPARC/KIF1B/P2RX4/FLNA/TUBA1C/CD84/SLC16A3/TFPI/MANF/TUBB6/BSG/ITGAX/PDGFA/PTPN1/ITGB2/ITGB1/ECM1/ANXA2/OLA1/PRKCB/CD58/NRAS/SCCPDH/HSPA5/KIF2A/PPP2CB/SPN/KIF16B/FAM3C/PLEK/KIF22/FYN/DGKH/CD44/WDR1/ITGA6/SIRPA/MAFF/DOCK3/CHID1/C1QBP/A2M/APOOL/SLC16A1/MIF/RAF1/CAPZA1/PIK3CB/SLC3A2/CD…
CELL CYCLE MITOTIC	1.33409	0.0222168	CCND1/PSMD14/TUBA1C/TUBB6/RAB1A/PSMD2/NEK6/PSMB2/PSMB5/PRKCB/TK1/LMNA/POM121C/AKT2/PSMC1/NUDC/MAPRE1/KIF2A/PSMD8/PPP2CB/RAB2A/CCND2/DYNC1I2/GMNN/RFC2/MYC/USO1/UBE2I/NUP88/SSNA1/ARPP19/PTTG1/POLD2/PSMA7/PHLDA1/RAN/RPA3/YWHAG/PSMD6/PSME3/PSMD4/CSNK2A1/DYRK1A/NUP188/CEP41/PSMA4/POLD4/PPP2R2D/UBE2S/CENPN/PSMD7/BLZF1/HAUS8/PSMA1/RBBP4/PSMC3/CENPH/MAU2/DHFR/PSMC2/PSMD1/CEP290/PSMC5/CDKN2B/RBX1/SEH1L/CD…
CHEMOKINE SIGNALING PATHWAY	-1.4799	0.017695	GNAI3/CXCL1/CXCL10/SHC1/WAS/VAV1/CCL20/CCL2/PLCB2/CCL3/NFKBIA/ADCY7/STAT1/DOCK2/GNG2/STAT3/CCL8/PREX1/RASGRP2/STAT2/CCL13/CXCR4/NCF1/CCL4L2/CXCL12/CCL18/CCL4/CXCL3/CXCL2
LEISHMANIA INFECTION	-1.50058	0.00759891	GNAI3/ARPC3/PTGIR/PRKAR2B/WAS/VAV1/MYO5A/IL6/IL10/HMOX1/ITPR2/SYK/ADCY7/WIPF1/PYCARD/GNG2/PLK2/IL18/FCGR1A/GPBAR1/CD163/CYSLTR1/C3AR1/CASP1/TXNIP/FCGR2A/FCGR3A/NLRP3/IL1B
MHC CLASS II ANTIGEN PRESENTATION	-1.50488	0.0345316	IFI30/AP1S2/TUBA1A/HLA-DRB5/AP2A2/OSBPL1A/CD74/HLA-DRB1/HLA-DRA/AP1B1/HLA-DOA/HLA-DMB/HLA-DQA1/HLA-DPA1/CTSC/HLA-DPB1/HLA-DQA2/HLA-DMA/HLA-DQB1
INFLUENZA INFECTION	-1.50723	0.0127105	GRSF1/RPL36/RPS28/RPL15/RPS3A/RPS8/RPS12/RPLP1/RPL37A/RPL13/NUP43/RPS19/RPLP0/RPL14/RPS3/UBA52/RPS9/RPS27/RPS21/RPS14/POLR2A/RPL6/FAU/RPL22/RPL38/RPS5/RPS18/RPL37/RPL32/RPL5/RPS7/RPS24/RPL11/RPL21/RPL29/RPL23A/RPS4X/RPL36A/PABPN1/RPLP2/RPL34/RPS23/IPO5/RPS15A/RPL19/RPS27A/RPL36AL/RPL24/RPS25/RPS29/RPS11/RPL27/RPL12/HSPA1A/RPS13/RPL35A/RPL23/RPS6/RPL4/EIF2AK2/NUP214/RPL30/RPL31/RAE1/RPS10/RPL26/RP…
INTERLEUKIN 4 AND INTERLEUKIN 13 SIGNALING	-1.57016	0.0362175	JUNB/IL6/CCL2/IL10/HMOX1/SOCS3/STAT1/STAT3/ALOX5/VEGFA/TIMP1/IL18/OSM/CDKN1A/CEBPD/FOS/MCL1/PTGS2/IL1B/F13A1
SIGNALING BY GPCR	-1.62317	0.000273184	PTGER4/PLA2G4A/ECE1/HRH1/GPR65/CAMKK2/PDE7A/ARHGEF6/PPP2CA/GNAI3/CXCL1/FPR2/CAMK2G/P2RY14/CXCL10/FZD2/GNA15/PTGIR/DGKA/CMKLR1/PRKAR2B/PDPK1/PLEKHG2/VAV1/CCL20/CCL2/ARHGEF1/PLCB2/CCL3/ITPR2/GPR35/ADCY7/GPR132/CRHBP/EDNRB/FGD4/CD55/FPR3/GNG2/FGD2/ADORA3/RGS2/GNAQ/PREX1/RASGRP2/LPAR6/GPBAR1/CCL13/CXCR4/CCL4L2/CYSLTR1/P2RY13/C3AR1/FPR1/CXCL12/GPR183/PDE4B/CCL4/HBEGF/RGS18/CXCL3/RHOB/CXCL2
CMYB PATHWAY	-1.69018	0.0320534	MAT2A/CREBBP/BIRC3/CDKN1B/HES1/ADA/MAF/ETS2/CDKN1A/CEBPD/ATP2B1/CD4/PTGS2
G ALPHA I SIGNALLING EVENTS	-1.71165	0.00070956	CAMKK2/PPP2CA/GNAI3/CXCL1/FPR2/CAMK2G/P2RY14/CXCL10/GNA15/PRKAR2B/CCL20/PLCB2/ITPR2/ADCY7/FPR3/GNG2/ADORA3/GNAQ/CCL13/CXCR4/CCL4L2/P2RY13/C3AR1/FPR1/CXCL12/GPR183/PDE4B/CCL4/RGS18/CXCL3/CXCL2
ACTIVATION OF THE MRNA UPON BINDING OF THE CAP BINDING COMPLEX AND EIFS AND SUBSEQUENT BINDING TO 43S	-1.80214	0.0162842	RPS16/EIF3G/RPS28/RPS3A/RPS8/RPS12/RPS19/RPS3/RPS9/RPS27/RPS21/EIF3D/RPS14/FAU/RPS5/RPS18/EIF3H/EIF4A2/RPS7/RPS24/RPS4X/RPS23/RPS15A/RPS27A/RPS25/RPS29/RPS11/EIF3E/RPS13/RPS6/EIF4B/EIF3L/EIF3F/EIF2S3/RPS10/RPS17/RPS20/PABPC1
IFNG PATHWAY	-1.80423	0.0402233	IRF9/CAMK2G/IRF1/STAT1/STAT3/PTPN2/IFNGR1/CREBBP/MAP3K1/CASP1/IL1B
REGULATED NECROSIS	-1.83873	0.017695	UBA52/CASP4/UBC/TP53/CHMP2B/FLOT1/RPS27A/IRF1/HMGB1/PDCD6IP/CFLAR/UBB/PELI1/BIRC3/IL18/TNFSF10/CASP1/IL1B
PYROPTOSIS	-1.84175	0.0493127	CASP4/TP53/CHMP2B/IRF1/HMGB1/IL18/CASP1/IL1B
CELL ADHESION MOLECULES CAMS	-1.87705	0.00411415	HLA-DRB5/ICAM3/HLA-E/SELL/SELPLG/PTPRC/HLA-F/HLA-DRB1/HLA-DRA/SDC3/HLA-DOA/HLA-DMB/HLA-DQA1/HLA-DPA1/HLA-DPB1/HLA-DQA2/CD4/SIGLEC1/HLA-DMA/VCAN/HLA-DQB1
CYTOKINE CYTOKINE RECEPTOR INTERACTION	-1.87753	2.97521e-05	TNFSF13B/IL10RB/CXCL1/CXCL10/IL6ST/IL1R1/IL15RA/IFNGR2/CCL20/LTB/IL1RAP/IL6/CCL2/CSF2RB/IL10/CCL3/IL2RA/LTBR/IFNAR2/TNFRSF1A/CCL8/IFNGR1/VEGFA/PDGFC/IL18/CSF2RA/CCL13/CSF3R/CXCR4/CCL4L2/OSM/CXCL12/CCL18/TNFSF10/CCL4/CXCL3/CXCL2/IL1B
CHEMOKINE RECEPTORS BIND CHEMOKINES	-1.89799	0.0345316	CXCL1/CXCL10/CCL20/CCL2/CCL3/CCL13/CXCR4/CXCL12/CCL4/CXCL3/CXCL2
PEPTIDE LIGAND BINDING RECEPTORS	-1.89967	0.0273487	CXCL1/FPR2/CXCL10/CCL20/CCL2/CCL3/EDNRB/FPR3/CCL13/CXCR4/C3AR1/FPR1/CXCL12/CCL4/CXCL3/CXCL2
BIOCARTA NKT PATHWAY	-1.90354	0.0385713	IFNGR2/CCL3/IFNGR1/CXCR4/CCL4/CD4
TOLL ENDOGENOUS PATHWAY	-1.90499	0.0279245	S100A9/HMGB1/CD14/TLR2/TLR4/S100A8/VCAN
VIRAL MYOCARDITIS	-1.91376	0.00766527	HLA-DRB5/HLA-E/CD55/HLA-F/HLA-DRB1/HLA-DRA/HLA-DOA/HLA-DMB/HLA-DQA1/HLA-DPA1/HLA-DPB1/HLA-DQA2/HLA-DMA/HLA-DQB1
BIOCARTA EICOSANOID PATHWAY	-1.91809	0.0320534	PTGER4/PLA2G4A/PTGIR/TBXAS1/ALOX5/ALOX5AP/CYSLTR1/PTGS2
COSTIMULATION BY THE CD28 FAMILY	-1.92332	0.00503661	AKT1/PIK3R1/ICOSLG/PPP2R5E/MLST8/CD86/HLA-DQB2/PPP2CA/PDPK1/VAV1/HLA-DRB5/HLA-DRB1/HLA-DRA/HLA-DQA1/HLA-DPA1/MAP3K8/HLA-DPB1/HLA-DQA2/CD4/HLA-DQB1
IMMUNOREGULATORY INTERACTIONS BETWEEN A LYMPHOID AND A NON LYMPHOID CELL	-1.92675	0.00116796	SIGLEC5/NPDC1/ICAM3/HLA-E/SELL/LAIR1/CD300LF/TREM1/CD1D/LILRA2/LILRA5/HLA-F/CD300A/CD200R1/SIGLEC10/FCGR1A/CD300E/FCGR3A/FCGR2B/LILRB2/SIGLEC1/LILRB5
IL12 STAT4 PATHWAY	-1.93688	0.0226978	CD86/IRF1/PIAS2/IL2RA/STAT3/CREBBP/IL18/HLA-DRA/FOS/CD4
SRP DEPENDENT COTRANSLATIONAL PROTEIN TARGETING TO MEMBRANE	-1.94495	0.000131026	RPS16/RPL36/RPS28/RPL15/RPS3A/SRP19/RPS8/RPS12/RPLP1/RPL37A/RPL13/RPS19/RPLP0/RPL14/RPS3/UBA52/RPS9/RPS27/RPS21/RPS14/RPL6/FAU/RPL22/RPL38/RPS5/RPS18/RPL37/RPL32/RPL5/RPS7/RPS24/RPL11/RPL21/RPL29/RPL23A/RPS4X/RPL36A/RPLP2/RPL34/RPS23/RPS15A/RPL19/SEC11A/RPS27A/RPL36AL/RPL24/RPS25/RPS29/RPS11/RPL27/RPL12/RPS13/RPL35A/RPL23/RPS6/RPL4/RPL30/RPL31/RPS10/RPL26/RPL17/RPS17/RPS20/RPL10A
PRIMARY IMMUNODEFICIENCY	-1.95473	0.0301286	JAK3/RFXANK/TAP1/PTPRC/RFX5/CIITA/ADA/CD4
COMPLEMENT AND COAGULATION CASCADES	-1.96231	0.0152456	CR1/PLAU/CD55/SERPINA1/SERPING1/C1QC/C1QB/C3AR1/C1QA/CFD/THBD/F13A1
INTERLEUKIN 10 SIGNALING	-1.97005	0.014012	IL10RA/CD86/TNF/IL10RB/CXCL1/CXCL10/IL1R1/CCL20/IL6/CCL2/IL10/CCL3/TNFRSF1A/STAT3/TIMP1/IL18/FPR1/CCL4/CXCL2/PTGS2/IL1B
DECTIN 2 FAMILY	-1.97115	0.0218109	SYK/CLEC4E/CLEC4A/CLEC10A
GPCR LIGAND BINDING	-1.98679	1.16139e-05	CCL19/FFAR4/CX3CR1/FFAR2/HCAR3/GABBR1/PTGER4/ECE1/HRH1/GPR65/CXCL1/FPR2/P2RY14/CXCL10/FZD2/PTGIR/CMKLR1/CCL20/CCL2/CCL3/GPR35/GPR132/CRHBP/EDNRB/CD55/FPR3/GNG2/ADORA3/LPAR6/GPBAR1/CCL13/CXCR4/CYSLTR1/P2RY13/C3AR1/FPR1/CXCL12/GPR183/CCL4/CXCL3/CXCL2
IL12 2PATHWAY	-1.99642	0.00535502	HLA-A/RELA/IL1R1/CCL3/IL2RA/GADD45B/STAT1/STAT3/IL18/HLA-DRA/CCL4/FOS/CD4/IL1B
NOD LIKE RECEPTOR SIGNALING PATHWAY	-2.01357	0.00371089	TNF/NOD2/RELA/SUGT1/CXCL1/CARD8/CARD9/NLRP1/IL6/CCL2/NFKBIA/PYCARD/CCL8/BIRC3/IL18/CCL13/TNFAIP3/CASP1/NAIP/CXCL2/NLRP3/IL1B
PURINERGIC SIGNALING IN LEISHMANIASIS INFECTION	-2.02579	0.0130805	MEFV/RELA/SUGT1/HMOX1/PYCARD/IL18/C3AR1/CASP1/TXNIP/NLRP3/IL1B
EUKARYOTIC TRANSLATION INITIATION	-2.04122	3.8367e-06	RPS16/RPL36/EIF3G/RPS28/RPL15/RPS3A/RPS8/RPS12/RPLP1/RPL37A/RPL13/RPS19/RPLP0/RPL14/RPS3/UBA52/RPS9/RPS27/RPS21/EIF3D/RPS14/RPL6/FAU/RPL22/RPL38/RPS5/RPS18/RPL37/EIF3H/RPL32/EIF4A2/RPL5/RPS7/RPS24/RPL11/RPL21/RPL29/RPL23A/RPS4X/RPL36A/RPLP2/RPL34/RPS23/RPS15A/RPL19/RPS27A/RPL36AL/RPL24/RPS25/RPS29/RPS11/RPL27/RPL12/EIF3E/RPS13/RPL35A/RPL23/RPS6/RPL4/EIF4B/EIF3L/EIF3F/RPL30/RPL31/EIF2S3/RPS10/RPL2…
BIOCARTA IL10 PATHWAY	-2.08056	0.00851948	STAT5A/IL10RA/TNF/IL10RB/BLVRA/IL6/IL10/HMOX1/STAT1/STAT3
CYTOSOLIC DNA SENSING PATHWAY	-2.15484	0.00169553	DDX58/RELA/POLR1D/CXCL10/IL6/NFKBIA/IRF7/PYCARD/IL18/CCL4L2/CASP1/CCL4/IL1B
INTERFERON SIGNALING	-2.15888	3.13e-08	GBP3/VCAM1/DDX58/HLA-A/HLA-DQB2/ISG20/EIF4E2/HLA-C/IFIT3/RPS27A/HERC5/IRF9/CAMK2G/IFIT1/IRF1/FCGR1B/IRF5/EIF2AK2/IFI30/IFNGR2/NUP214/IFIT2/TRIM22/HLA-DRB5/HLA-E/UBB/ARIH1/RAE1/MX1/IRF7/SOCS3/STAT1/MT2A/IFNAR2/UBE2L6/OASL/PTPN2/HLA-F/IFNGR1/HLA-DRB1/FCGR1A/XAF1/OAS2/STAT2/GBP4/CIITA/HLA-DRA/EGR1/ISG15/HLA-DQA1/HLA-DPA1/HLA-DPB1/IFITM3/HLA-DQA2/IFITM2/HLA-DQB1
CLASS A 1 RHODOPSIN LIKE RECEPTORS	-2.16861	7.13739e-06	CCL19/FFAR4/CX3CR1/FFAR2/HCAR3/PTGER4/ECE1/HRH1/GPR65/CXCL1/FPR2/P2RY14/CXCL10/PTGIR/CMKLR1/CCL20/CCL2/CCL3/GPR35/GPR132/EDNRB/FPR3/ADORA3/LPAR6/GPBAR1/CCL13/CXCR4/CYSLTR1/P2RY13/C3AR1/FPR1/CXCL12/GPR183/CCL4/CXCL3/CXCL2
IL27 PATHWAY	-2.23162	0.00149354	IL27RA/STAT5A/IL12RB1/TNF/EBI3/IL6ST/IL6/STAT1/STAT3/IL18/STAT2/IL1B
INITIAL TRIGGERING OF COMPLEMENT	-2.23547	0.00100512	C2/C1QC/C1QB/C1QA/CFD/CFP/FCN1
SELENOAMINO ACID METABOLISM	-2.24054	5.57609e-07	RPS16/RPL36/RPS28/RPL15/RPS3A/RPS8/RPS12/RPLP1/RPL37A/RPL13/RPS19/RPLP0/RPL14/RPS3/UBA52/RPS9/RPS27/RPS21/RPS14/AHCY/RPL6/FAU/RPL22/RPL38/RPS5/RPS18/RPL37/RPL32/RPL5/RPS7/RPS24/RPL11/EEF1E1/RPL21/RPL29/RPL23A/RPS4X/RPL36A/RPLP2/RPL34/RPS23/RPS15A/RPL19/NNMT/RPS27A/RPL36AL/RPL24/RPS25/RPS29/RPS11/RPL27/RPL12/RPS13/RPL35A/RPL23/RPS6/RPL4/PAPSS2/RPL30/RPL31/RPS10/RPL26/RPL17/RPS17/RPS20/RPL10A
COMPLEMENT CASCADE	-2.37751	0.000228308	C2/CR1/CD55/SERPING1/C1QC/C1QB/C3AR1/C1QA/CFD/CFP/FCN1
IL23 PATHWAY	-2.37954	0.000223987	IL12RB1/PIK3R1/TNF/RELA/CXCL1/IL6/CCL2/NFKBIA/SOCS3/STAT1/STAT3/IL18/CD4/IL1B
GENERATION OF SECOND MESSENGER MOLECULES	-2.3936	0.000206061	WAS/HLA-DRB5/HLA-DRB1/HLA-DRA/LCP2/HLA-DQA1/HLA-DPA1/HLA-DPB1/HLA-DQA2/CD4/HLA-DQB1
INTERFERON ALPHA BETA SIGNALING	-2.40979	2.07554e-05	IFI35/MX2/HLA-A/ISG20/HLA-C/IFIT3/IRF9/IFIT1/IRF1/IRF5/IFIT2/HLA-E/MX1/IRF7/SOCS3/STAT1/IFNAR2/OASL/HLA-F/XAF1/OAS2/STAT2/EGR1/ISG15/IFITM3/IFITM2
PD 1 SIGNALING	-2.43675	5.87063e-05	HLA-DRB5/HLA-DRB1/HLA-DRA/HLA-DQA1/HLA-DPA1/HLA-DPB1/HLA-DQA2/CD4/HLA-DQB1
RESPONSE OF EIF2AK4 GCN2 TO AMINO ACID DEFICIENCY	-2.45369	3.78118e-08	RPS16/RPL36/RPS28/RPL15/RPS3A/RPS8/RPS12/RPLP1/RPL37A/RPL13/RPS19/RPLP0/RPL14/RPS3/UBA52/RPS9/RPS27/RPS21/RPS14/RPL6/FAU/RPL22/RPL38/RPS5/RPS18/RPL37/RPL32/RPL5/RPS7/RPS24/RPL11/RPL21/RPL29/RPL23A/RPS4X/RPL36A/RPLP2/RPL34/RPS23/RPS15A/RPL19/RPS27A/RPL36AL/RPL24/RPS25/RPS29/RPS11/RPL27/RPL12/RPS13/RPL35A/RPL23/RPS6/RPL4/RPL30/RPL31/EIF2S3/RPS10/RPL26/RPL17/RPS17/RPS20/RPL10A
ANTIGEN PROCESSING AND PRESENTATION	-2.52658	3.8367e-06	HLA-A/LGMN/HLA-C/HSPA2/HSPA1A/RFXANK/IFI30/HLA-DRB5/TAP1/HLA-E/HLA-F/CD74/HLA-DRB1/RFX5/CIITA/HLA-DRA/HLA-DOA/HLA-DMB/HLA-DQA1/HLA-DPA1/HLA-DPB1/HLA-DQA2/CD4/HLA-DMA/HLA-DQB1
ASTHMA	-2.57289	1.58744e-06	HLA-DRB5/IL10/HLA-DRB1/HLA-DRA/HLA-DOA/HLA-DMB/HLA-DQA1/HLA-DPA1/HLA-DPB1/HLA-DQA2/FCER1A/HLA-DMA/HLA-DQB1
NONSENSE MEDIATED DECAY NMD	-2.59709	3.13e-08	RPS16/RPL36/RPS28/RPL15/RPS3A/RPS8/RPS12/RPLP1/RPL37A/RPL13/RPS19/RPLP0/RPL14/EIF4A3/RPS3/UBA52/RPS9/RPS27/RPS21/UPF1/RPS14/RPL6/FAU/RPL22/SMG1/RPL38/RPS5/RPS18/RPL37/ETF1/RPL32/RPL5/RPS7/RPS24/RPL11/RPL21/RPL29/RPL23A/RPS4X/RPL36A/RPLP2/RPL34/RPS23/RPS15A/RPL19/UPF3A/PPP2CA/RPS27A/RPL36AL/RPL24/RPS25/RPS29/RPS11/RPL27/RPL12/DCP1A/RPS13/RPL35A/RPL23/RPS6/RPL4/UPF2/MAGOH/PNRC2/RPL30/RPL31/RPS10/RP…
AUTOIMMUNE THYROID DISEASE	-2.6068	2.39824e-06	CD86/HLA-A/HLA-C/HLA-DRB5/HLA-E/IL10/HLA-F/HLA-DRB1/HLA-DRA/HLA-DOA/HLA-DMB/HLA-DQA1/HLA-DPA1/HLA-DPB1/HLA-DQA2/HLA-DMA/HLA-DQB1
SYSTEMIC LUPUS ERYTHEMATOSUS	-2.63532	7.40189e-07	HLA-DRB5/IL10/HLA-DRB1/FCGR1A/C1QC/HLA-DRA/C1QB/HLA-DOA/HLA-DMB/HLA-DQA1/HLA-DPA1/C1QA/HLA-DPB1/HLA-DQA2/FCGR2A/FCGR3A/FCGR2B/HLA-DMA/HLA-DQB1
ALLOGRAFT REJECTION	-2.6451	1.88187e-06	CD86/TNF/HLA-A/HLA-C/HLA-DRB5/HLA-E/IL10/HLA-F/HLA-DRB1/HLA-DRA/HLA-DOA/HLA-DMB/HLA-DQA1/HLA-DPA1/HLA-DPB1/HLA-DQA2/HLA-DMA/HLA-DQB1
LEISHMANIA INFECTION	-2.67568	3.78118e-08	CR1/IFNGR2/HLA-DRB5/IL10/NFKBIA/NCF4/STAT1/TLR2/IFNGR1/HLA-DRB1/FCGR1A/HLA-DRA/NCF1/HLA-DOA/HLA-DMB/HLA-DQA1/TLR4/HLA-DPA1/MARCKSL1/FOS/HLA-DPB1/HLA-DQA2/FCGR2A/FCGR3A/HLA-DMA/PTGS2/HLA-DQB1/IL1B
TYPE I DIABETES MELLITUS	-2.74329	3.3046e-07	CD86/TNF/HLA-A/HLA-C/HLA-DRB5/HLA-E/HLA-F/HLA-DRB1/HLA-DRA/HLA-DOA/HLA-DMB/HLA-DQA1/HLA-DPA1/HLA-DPB1/HLA-DQA2/HLA-DMA/HLA-DQB1/IL1B
INTERFERON GAMMA SIGNALING	-2.7645	3.13e-08	GBP3/VCAM1/HLA-A/HLA-DQB2/HLA-C/IRF9/CAMK2G/IRF1/FCGR1B/IRF5/IFI30/IFNGR2/TRIM22/HLA-DRB5/HLA-E/IRF7/SOCS3/STAT1/MT2A/OASL/PTPN2/HLA-F/IFNGR1/HLA-DRB1/FCGR1A/OAS2/GBP4/CIITA/HLA-DRA/HLA-DQA1/HLA-DPA1/HLA-DPB1/HLA-DQA2/HLA-DQB1
INTESTINAL IMMUNE NETWORK FOR IGA PRODUCTION	-2.78246	1.03377e-07	TNFSF13B/IL15RA/IL6/HLA-DRB5/IL10/LTBR/HLA-DRB1/HLA-DRA/CXCR4/HLA-DOA/HLA-DMB/HLA-DQA1/HLA-DPA1/CXCL12/HLA-DPB1/HLA-DQA2/HLA-DMA/HLA-DQB1
GRAFT VERSUS HOST DISEASE	-2.79412	4.09848e-08	CD86/TNF/HLA-A/HLA-C/IL6/HLA-DRB5/HLA-E/HLA-F/HLA-DRB1/HLA-DRA/HLA-DOA/HLA-DMB/HLA-DQA1/HLA-DPA1/HLA-DPB1/HLA-DQA2/HLA-DMA/HLA-DQB1/IL1B
RIBOSOME	-2.8656	3.13e-08	RPL13A/RPL28/RSL24D1/RPS16/RPL36/RPS28/RPL15/RPS3A/RPS8/RPS12/RPLP1/RPL37A/RPL13/RPS19/RPLP0/RPL14/RPS3/UBA52/RPS9/RPS27/RPS21/RPL6/FAU/RPL22/RPL38/RPS5/RPS18/RPL37/RPL32/RPL5/RPS7/RPS24/RPL11/RPL21/RPL29/RPL23A/RPS4X/RPL36A/RPLP2/RPL34/RPS23/RPS15A/RPL19/RPS27A/RPL36AL/RPL24/RPS25/RPS29/RPS11/RPL27/RPL12/RPS13/RPL35A/RPL23/RPS6/RPL4/RPL30/RPL31/RPS10/RPL26/RPL17/RPS17/RPS20/RPL10A
EUKARYOTIC TRANSLATION ELONGATION	-2.97244	3.13e-08	RPS16/RPL36/RPS28/RPL15/RPS3A/RPS8/RPS12/RPLP1/RPL37A/RPL13/RPS19/RPLP0/RPL14/RPS3/UBA52/RPS9/RPS27/RPS21/RPS14/RPL6/FAU/RPL22/RPL38/RPS5/RPS18/EEF1A1/RPL37/RPL32/EEF1G/RPL5/RPS7/EEF1B2/RPS24/RPL11/RPL21/RPL29/RPL23A/RPS4X/RPL36A/RPLP2/RPL34/RPS23/EEF2/RPS15A/RPL19/RPS27A/RPL36AL/RPL24/RPS25/RPS29/RPS11/RPL27/RPL12/RPS13/RPL35A/RPL23/RPS6/RPL4/RPL30/EEF1D/RPL31/RPS10/RPL26/RPL17/RPS17/RPS20/RPL10A
GO: Biological Processes	NES	FDR	Core Enrichment
POSITIVE REGULATION OF STRESS FIBER ASSEMBLY	1.90542	0.00304906	RGCC/ITGB1BP1/CCDC88A/SDC4/EVL/RHOC/NRP1/LIMK1/SORBS3/FERMT2
EXTRACELLULAR MATRIX DISASSEMBLY	1.8914	0.00610507	MMP9/CTSK/MMP7/GSN/CAPG/MMP19/FSCN1/LCP1/MMP2/PDPN
CELLULAR RESPONSE TO LOW DENSITY LIPOPROTEIN PARTICLE STIMULUS	1.87147	0.00445489	LPL/CD9/CD36/PPARG/ITGB2/ITGB1/SREBF2/CD81
POSITIVE REGULATION OF ACTIN FILAMENT BUNDLE ASSEMBLY	1.86886	0.003711	RGCC/ITGB1BP1/CCDC88A/SDC4/EVL/RHOC/NRP1/LIMK1/SORBS3/FERMT2/PLEK
MITOCHONDRIAL CALCIUM ION HOMEOSTASIS	1.86666	0.0129806	TGM2/BCAP31/MICU1/MCU/SLC8B1/FIS1/LETM1/RAP1GDS1/IMMT/AFG3L2/MICU2/BNIP3
ENDOPLASMIC RETICULUM TO CYTOSOL TRANSPORT	1.85608	0.00551887	BCAP31/HM13/UBE2J1/SEL1L/DERL2/DERL1/VCP/HSP90B1/ERLEC1/FAF2/NPLOC4/RHBDD1/SYVN1/EDEM2/SEC61B
REGULATION OF PLASMA LIPOPROTEIN PARTICLE LEVELS	1.84752	0.00554372	LPL/PLA2G7/NCEH1/TREM2/APOC1/CD36/APOE/LIPA/ANXA2/APOC2
REGULATION OF RUFFLE ASSEMBLY	1.84534	0.0125838	EVL/HRAS/RDX/P2RX4/CORO1C/SH3YL1/PLEKHM1/EPS8/DEF8/CYFIP1/NDEL1
ENDODERMAL CELL DIFFERENTIATION	1.84382	0.00663893	MMP9/ITGB5/COL6A1/FN1/ITGA5/ITGB2/CTR9/MMP2
CELLULAR RESPONSE TO LIPOPROTEIN PARTICLE STIMULUS	1.82785	0.0129806	LPL/CD9/TREM2/CD36/APOE/PPARG/ITGB2/ITGB1/SREBF2/CD81
PLASMA LIPOPROTEIN PARTICLE CLEARANCE	1.81508	0.0159838	NCEH1/TREM2/APOC1/CD36/APOE/LIPA/ANXA2/APOC2
ODONTOGENESIS OF DENTIN CONTAINING TOOTH	1.80298	0.0134881	FAM20C/CSF1/SERPINE1/FAM20A/TCIRG1/BSG/HTRA1
GLYCOLYTIC PROCESS THROUGH FRUCTOSE 6 PHOSPHATE	1.80142	0.0137477	PFKP/ENO1/HK1/HK3/ENO2/GALK1/HK2/FOXK2
PROTEIN CONTAINING COMPLEX REMODELING	1.79995	0.0126006	LPL/PLA2G7/APOC1/APOE/APOC2
OSTEOCLAST DEVELOPMENT	1.79944	0.0111965	FAM20C/SIGLEC15/ATP6AP1/ANXA2
PEPTIDYL ASPARAGINE MODIFICATION	1.79151	0.0159838	RPN1/ALG8/OSTC/MAGT1/UBE2J1/ALG5/RPN2/DAD1/DDOST/ST6GAL1
AMYLOID FIBRIL FORMATION	1.78951	0.0145698	GSN/TREM2/CD36/APOE/PFDN6/VBP1/SIAH2/PFDN2/BACE1/SIAH1
REGULATION OF CYSTEINE TYPE ENDOPEPTIDASE ACTIVITY INVOLVED IN APOPTOTIC SIGNALING PATHWAY	1.78193	0.030619	MMP9/GSN/LGALS9/ST18
COLLAGEN METABOLIC PROCESS	1.77743	0.0145698	MMP9/CTSK/MMP7/RGCC/MMP19/ITGB1/PLOD3/ENG/VIM/MMP2/EMILIN1/PPARD/CTSB/CTSL/ADAM15/MRC2/P2RX7/TRAM2/PEPD/COL1A1
COLLAGEN CATABOLIC PROCESS	1.77518	0.0338063	MMP9/CTSK/MMP7/MMP19/ITGB1/MMP2/CTSB/CTSL/ADAM15/MRC2
LONG CHAIN FATTY ACID TRANSPORT	1.77385	0.0145698	FABP5/FABP4/CD36/APOE/PPARG/FABP3/SLC2A1/ACE/AKT2/NMB/MFSD2A/MIF/ACSL5/CPT2/ACSL3/SLC27A4/ANXA1
PROTON TRANSMEMBRANE TRANSPORT	1.77274	0.00191748	ATP6V0D2/CYB5A/ATP6V1H/SLC17A5/TCIRG1/ATP1A1/ATP6V1A/STOML2/ATP6V1E1/SLC9A7/ATP6V1G1/UQCRFS1/ATP6V1F/UQCRC1/SLC30A5/ATP6V0D1/TMCO3/ATP6V1C1/ACTN4/COX17/SLC11A2/ATP7A/COX5B/UQCRH/SLC15A3/CLCN3/ATP6V1B2/CYC1/NDUFA4/TACO1/COX6A1/COX5A/SLC47A1
MONOSACCHARIDE CATABOLIC PROCESS	1.76932	0.0231291	PFKP/GALM/ENO1/RPE/HK1/HK3/ENO2/GALK1/HK2/FOXK2/GALE/PFKL
NADH METABOLIC PROCESS	1.7589	0.0266912	PFKP/PCK2/MDH1/ENO1/HK1/HK3/ENO2/HK2/VCP/FOXK2/NQO1/PFKL/IDH3B/OGDH/GPD2
TOOTH MINERALIZATION	1.75817	0.0301489	FAM20C/FAM20A/TCIRG1
HETEROPHILIC CELL CELL ADHESION VIA PLASMA MEMBRANE CELL ADHESION MOLECULES	1.75783	0.0204551	ALCAM/ITGA5/CADM1/CD164
POSITIVE REGULATION OF PROTEIN TARGETING TO MEMBRANE	1.75149	0.0350215	ITGB1BP1/HRAS/ITGB2/AKT2/MYO1C/FIS1/FYN/CIB1
