# Supplementary material for: Systems level identification of a matrisome-associated macrophage polarisation state in multi-organ fibrosis
Source: eLife. 2023 Sep 14;12:e85530. doi: 10.7554/eLife.85530 (PMC10547479; doi:10.7554/eLife.85530)
Supplement: Figure 2—source data 4. [file elife-85530-fig2-data4.xlsx]

## Sheet: SuppTable7
Figure 2-source data 4. Signature genes of "ECM-remodeling processes" upregulated in SPP1+MAM+ macrophages
Symbol	Gene Name	Avg. Log2FC (SPP1+MAM+ / SPP1+MAM-)	Difference in proportion of expression between SPP1+MAM+ and SPP1+MAM-
SPP1	secreted phosphoprotein 1	1.76967	0.426833
MMP9	matrix metallopeptidase 9	1.60651	0.273167
CTSK	cathepsin K	1.16922	0.200167
MMP7	matrix metallopeptidase 7	1.06005	0.121333
SDC2	syndecan 2	0.995432	0.239333
SERPINE1	serpin family E member 1	0.81897	0.154
GSN	gelsolin	0.747437	0.214333
ITGB5	integrin subunit beta 5	0.724003	0.134333
SDC4	syndecan 4	0.638816	0.154333
COL6A2	collagen type VI alpha 2 chain	0.614755	0.111
ACTN1	actinin alpha 1	0.60818	0.169667
MMP19	matrix metallopeptidase 19	0.578464	0.146
CD36	CD36 molecule	0.571825	0.114167
COL6A1	collagen type VI alpha 1 chain	0.566895	0.116667
FN1	fibronectin 1	0.565275	0.121
ITGA5	integrin subunit alpha 5	0.555733	0.119333
ADAM9	ADAM metallopeptidase domain 9	0.510313	0.139667
SPARC	secreted protein acidic and cysteine rich	0.502248	0.1235
