# Supplementary material for: Systems level identification of a matrisome-associated macrophage polarisation state in multi-organ fibrosis
Source: eLife. 2023 Sep 14;12:e85530. doi: 10.7554/eLife.85530 (PMC10547479; doi:10.7554/eLife.85530)
Supplement: Figure 2—source data 5. [file elife-85530-fig2-data5.xlsx]

## Sheet: SuppTable8
Figure 2-source data 5. Signature genes of "metabolic processes" upregulated in SPP1+MAM+ macrophages
Symbol	Gene Name	Avg. Log2FC (SPP1+MAM+ / SPP1+MAM-)	Difference in proportion of expression between SPP1+MAM+ and SPP1+MAM-
MMP9	matrix metallopeptidase 9	1.60651	0.273167
LPL	lipoprotein lipase	1.60416	0.3545
GPC4	glypican 4	1.3105	0.213833
FBP1	fructose-bisphosphatase 1	1.00471	0.2885
SDC2	syndecan 2	0.995432	0.239333
FABP5	fatty acid binding protein 5	0.823289	0.1825
SERPINE1	serpin family E member 1	0.81897	0.154
GCLC	glutamate-cysteine ligase catalytic subunit	0.804406	0.204667
FABP4	fatty acid binding protein 4	0.790381	0.124
CYP27A1	cytochrome P450 family 27 subfamily A member 1	0.74275	0.193167
ITGB5	integrin subunit beta 5	0.724003	0.134333
ATP6V0D2	ATPase H+ transporting V0 subunit d2	0.674039	0.119833
PFKP	phosphofructokinase, platelet	0.656859	0.116667
SDC4	syndecan 4	0.638816	0.154333
GALM	galactose mutarotase	0.594092	0.155333
MGST1	microsomal glutathione S-transferase 1	0.5871	0.126
G6PD	glucose-6-phosphate dehydrogenase	0.582855	0.121
CD36	CD36 molecule	0.571825	0.114167
FN1	fibronectin 1	0.565275	0.121
SRM	spermidine synthase	0.56059	0.131833
ACADM	acyl-CoA dehydrogenase medium chain	0.556636	0.0993333
ITGA5	integrin subunit alpha 5	0.555733	0.119333
APOE	apolipoprotein E	0.543285	0.150167
ATP6V1H	ATPase H+ transporting V1 subunit H	0.528748	0.124333
FABP3	fatty acid binding protein 3	0.52342	0.116833
PKM	pyruvate kinase M1/2	0.509909	0.117833
NDUFS3	NADH:ubiquinone oxidoreductase core subunit S3	0.508643	0.1615
