# Supplementary material for: Systems level identification of a matrisome-associated macrophage polarisation state in multi-organ fibrosis
Source: eLife. 2023 Sep 14;12:e85530. doi: 10.7554/eLife.85530 (PMC10547479; doi:10.7554/eLife.85530)
Supplement: Figure 4—source data 1. [file elife-85530-fig4-data1.xlsx]

## Sheet: SuppTable9
Figure 4-source data 1. Member genes of regulons listed in Figure 4D
JDP2(-)			KLF3(-)			CEBPD(-)
n = 33 target genes			n = 20 target genes			n = 72 target genes
SYMBOL	GENE NAME		SYMBOL	GENE NAME		SYMBOL	GENE NAME
CHI3L1	Chitinase 3-like 1		APOE	Apolipoprotein E		SPP1	Secreted phosphoprotein 1
C15orf48	Chromosome 15 open reading frame 48		MMP9	Matrix metallopeptidase 9		CCL2	C-C motif chemokine ligand 2
CD52	CD52 molecule		CHI3L1	Chitinase 3-like 1		CTSD	Cathepsin D
LPL	Lipoprotein lipase		LPL	Lipoprotein lipase		NUPR1	Nuclear protein 1
FTH1	Ferritin heavy chain 1		ACTB	Actin beta		S100A6	S100 calcium-binding protein A6
B2M	Beta-2-microglobulin		IFI6	Interferon alpha-inducible protein 6		CD52	CD52 molecule
CD9	CD9 molecule		PLA2G7	Phospholipase A2 group VII		CSTB	Cystatin B
LGALS3	Galectin 3		TREM2	Triggering receptor expressed on myeloid cells 2		TM4SF19	Transmembrane 4 L six family member 19
SDC2	Syndecan 2		MGST1	Microsomal glutathione S-transferase 1		BCL2A1	BCL2-related protein A1
GPC4	Glypican 4		MNDA	Myeloid cell nuclear differentiation antigen		GDF15	Growth differentiation factor 15
CYP27A1	Cytochrome P450 family 27 subfamily A member 1		GSN	Gelsolin		ALOX5AP	Arachidonate 5-lipoxygenase-activating protein
CSF1	Colony stimulating factor 1 (macrophage)		LSP1	Lymphocyte-specific protein 1		LGALS3	Galectin 3
REL	REL proto-oncogene, NF-kB subunit		ITGB2	Integrin subunit beta 2		S100A10	S100 calcium-binding protein A10
NR1H3	Nuclear receptor subfamily 1 group H member 3		RAC2	Rac family small GTPase 2		SDC2	Syndecan 2
S100A11	S100 calcium-binding protein A11		PDIA4	Protein disulfide isomerase family A member 4		GPC4	Glypican 4
CBLB	Cbl proto-oncogene B		KLF3	Kruppel-like factor 3		GCHFR	GTP cyclohydrolase 1 feedback regulatory protein
MGST1	Microsomal glutathione S-transferase 1		ACTG1	Actin gamma 1		CEBPD	CCAAT/enhancer binding protein delta
CD44	CD44 molecule		SLC16A3	Solute carrier family 16 member 3		CSF1	Colony-stimulating factor 1
CD63	CD63 molecule		CISD1	CDGSH iron sulfur domain 1		EMP3	Epithelial membrane protein 3
ARID5B	AT-rich interaction domain 5B		PPP1R14B	Protein phosphatase 1 regulatory subunit 14B		TXN	Thioredoxin
MITF	Melanocyte inducing transcription factor					EMP1	Epithelial membrane protein 1
PPDPF	Pancreatic progenitor cell differentiation and proliferation factor					FABP3	Fatty acid binding protein 3
KYNU	Kynureninase					SEMA3C	Semaphorin 3C
PIM3	Pim-3 proto-oncogene, serine/threonine kinase					ALCAM	Activated leukocyte cell adhesion molecule
FGR	Gardner-Rasheed feline sarcoma viral oncogene homolog					FLNA	Filamin A
PTPRE	Protein tyrosine phosphatase, receptor type E					FNIP2	Folliculin-interacting protein 2
ASAP1	ArfGAP with SH3 domain, ankyrin repeat and PH domain 1					MSR1	Macrophage scavenger receptor 1
SPTBN1	Spectrin beta, non-erythrocytic 1					NR1H3	Nuclear receptor subfamily 1 group H member 3
SLC41A2	Solute carrier family 41 member 2					SCD	Stearoyl-CoA desaturase
JDP2	Jun dimerization protein 2					ATP13A3	ATPase cation transporting 13A3
HEXB	Hexosaminidase subunit beta					MYL9	Myosin light chain 9
RASAL2	RAS protein activator like 2					TNFSF14	Tumor necrosis factor ligand superfamily member 14
NUMB	NUMB endocytic adaptor protein					S100A11	S100 calcium-binding protein A11
						TREM1	Triggering receptor expressed on myeloid cells 1
						CBLB	Cbl proto-oncogene B
						MGST1	Microsomal glutathione S-transferase 1
						SAMD4A	Sterile alpha motif domain-containing protein 4A
						GM2A	GM2 ganglioside activator
						ZNF438	Zinc finger protein 438
						ABCG1	ATP-binding cassette sub-family G member 1
						OSBPL8	Oxysterol-binding protein-related protein 8
						MAML2	Mastermind-like transcriptional coactivator 2
						MYADM	Myeloid-associated differentiation marker
						OPTN	Optineurin
						PPARG	Peroxisome proliferator-activated receptor gamma
						MITF	Melanocyte inducing transcription factor
						FGR	Gardner-Rasheed feline sarcoma viral oncogene homolog
						MAP4K4	Mitogen-activated protein kinase kinase kinase kinase 4
						PLXDC2	Plexin domain-containing protein 2
						ASAP1	ArfGAP with SH3 domain, ankyrin repeat and PH domain 1
						S100A13	S100 calcium-binding protein A13
						GLIPR2	GLI pathogenesis-related 2
						SNX10	Sorting nexin 10
						PTPRJ	Protein tyrosine phosphatase receptor type J
						CAMK2D	Calcium/calmodulin-dependent protein kinase II delta
						SPN	Sialophorin
						MFHAS1	Male fertility-related gene on chromosome 8-associated protein 1
						SLC12A6	Solute carrier family 12 member 6
						GLRX	Glutaredoxin
						ITGA5	Integrin subunit alpha 5
						MRAS	Muscle RAS oncogene homolog
						NUMB	NUMB endocytic adaptor protein
						ITGB1BP1	Integrin subunit beta 1 binding protein 1
						PDE8A	Phosphodiesterase 8A
						MADD	MAP-kinase activating death domain
						SLC39A11	Solute carrier family 39 member 11
						MYL6	Myosin light chain 6
						COL8A2	Collagen type VIII alpha 2 chain
						PHLDA3	Pleckstrin homology-like domain family A member 3
						ACTN1	Actinin alpha 1
						NOP10	NOP10 ribonucleoprotein
						ADAM10	ADAM metallopeptidase domain 10
