# Supplementary material for: Systems level identification of a matrisome-associated macrophage polarisation state in multi-organ fibrosis
Source: eLife. 2023 Sep 14;12:e85530. doi: 10.7554/eLife.85530 (PMC10547479; doi:10.7554/eLife.85530)
Supplement: Figure 5—source data 1. [file elife-85530-fig5-data1.xlsx]

## Sheet: SuppTable10
Figure 5-source data 1. Signature genes of SPP1+MAM- macrophages
Symbol	Gene Name	Avg. Log2FC (SPP1+MAM+ / SPP1+MAM-)	Difference in proportion of expression between SPP1+MAM+ and SPP1+MAM-
IFI44L	interferon induced protein 44 like	-0.500149	-0.0625
PNRC1	proline rich nuclear receptor coactivator 1	-0.500328	-0.147
GIMAP1	GTPase, IMAP family member 1	-0.500639	-0.0826667
CDKN1A	cyclin dependent kinase inhibitor 1A	-0.503898	-0.0841667
GPR34	G protein-coupled receptor 34	-0.505508	-0.102833
CSTA	cystatin A	-0.507573	-0.114667
MARCKSL1	MARCKS like 1	-0.508283	-0.0685
AIF1	allograft inflammatory factor 1	-0.50929	-0.129833
PID1	phosphotyrosine interaction domain containing 1	-0.509352	-0.0676667
ARL4C	ADP ribosylation factor like GTPase 4C	-0.512435	-0.0751667
CASP1	caspase 1	-0.514044	-0.101167
SAMSN1	SAM domain, SH3 domain and nuclear localization signals 1	-0.514961	-0.125167
RBP7	retinol binding protein 7	-0.515457	-0.07
MXD1	MAX dimerization protein 1	-0.516462	-0.0715
PDE4B	phosphodiesterase 4B	-0.51903	-0.0756667
CEBPD	CCAAT enhancer binding protein delta	-0.521705	-0.136833
CCNH	cyclin H	-0.521793	-0.08
CFD	complement factor D	-0.525851	-0.114833
ATP2B1	ATPase plasma membrane Ca2+ transporting 1	-0.526809	-0.120667
SULT1A1	sulfotransferase family 1A member 1	-0.529455	-0.0781667
MAP3K8	mitogen-activated protein kinase kinase kinase 8	-0.529499	-0.099
TXNIP	thioredoxin interacting protein	-0.529726	-0.117333
C1orf162	chromosome 1 open reading frame 162	-0.532298	-0.149
RGL1	ral guanine nucleotide dissociation stimulator like 1	-0.534112	-0.0898333
IER3	immediate early response 3	-0.536513	-0.151833
NFKBIZ	NFKB inhibitor zeta	-0.538525	-0.087
CTSC	cathepsin C	-0.539778	-0.144833
ALDH1A1	aldehyde dehydrogenase 1 family member A1	-0.541256	-0.0945
NAMPT	nicotinamide phosphoribosyltransferase	-0.548034	-0.137
CCL4	C-C motif chemokine ligand 4	-0.550286	-0.107167
RNASE6	ribonuclease A family member k6	-0.551571	-0.129333
SLCO2B1	solute carrier organic anion transporter family member 2B1	-0.556377	-0.121333
S100A8	S100 calcium binding protein A8	-0.556487	-0.0761667
HBEGF	heparin binding EGF like growth factor	-0.55796	-0.0828333
RGS18	regulator of G protein signaling 18	-0.562216	-0.0875
TMEM173	Stimulator Of Interferon Response CGAMP Interactor 1	-0.564282	-0.0881667
IFI16	interferon gamma inducible protein 16	-0.565772	-0.124667
CARD16	caspase recruitment domain family member 16	-0.565947	-0.12
CPVL	carboxypeptidase vitellogenic like	-0.566161	-0.13
CD93	CD93 molecule	-0.567831	-0.1145
FOS	Fos proto-oncogene, AP-1 transcription factor subunit	-0.56876	-0.148167
LYVE1	lymphatic vessel endothelial hyaluronan receptor 1	-0.570368	-0.0753333
CXCL3	C-X-C motif chemokine ligand 3	-0.570875	-0.0983333
HLA-DPB1	major histocompatibility complex, class II, DP beta 1	-0.572945	-0.1505
IFITM3	interferon induced transmembrane protein 3	-0.578844	-0.144167
HLA-DQA2	major histocompatibility complex, class II, DQ alpha 2	-0.578924	-0.0948333
RHOB	ras homolog family member B	-0.583544	-0.106667
CD4	CD4 molecule	-0.583769	-0.1225
FCGR2A	Fc gamma receptor IIa	-0.584123	-0.156
CD300E	CD300e molecule	-0.593904	-0.0663333
NAIP	NLR family apoptosis inhibitory protein	-0.595085	-0.122833
FCGR3A	Fc gamma receptor IIIa	-0.596544	-0.146
THBS1	thrombospondin 1	-0.598263	-0.0605
TAGAP	T cell activation RhoGTPase activating protein	-0.59966	-0.0823333
FGL2	fibrinogen like 2	-0.600153	-0.133167
IFITM2	interferon induced transmembrane protein 2	-0.60142	-0.1465
ANKRD12	ankyrin repeat domain 12	-0.603144	-0.1245
MCL1	MCL1 apoptosis regulator, BCL2 family member	-0.614841	-0.143833
FCGR2B	Fc gamma receptor IIb	-0.61726	-0.141667
FCER1A	Fc epsilon receptor Ia	-0.619231	-0.0618333
PMP22	peripheral myelin protein 22	-0.637004	-0.1055
IGF1	insulin like growth factor 1	-0.637547	-0.0693333
CXCL2	C-X-C motif chemokine ligand 2	-0.637806	-0.127833
LILRB2	leukocyte immunoglobulin like receptor B2	-0.645916	-0.114
GAS6	growth arrest specific 6	-0.652333	-0.0988333
SIGLEC1	sialic acid binding Ig like lectin 1	-0.652961	-0.0926667
HLA-DMA	major histocompatibility complex, class II, DM alpha	-0.655262	-0.1805
NLRP3	NLR family pyrin domain containing 3	-0.665658	-0.0895
FOLR2	folate receptor beta	-0.672027	-0.157167
THBD	thrombomodulin	-0.685692	-0.103833
VCAN	versican	-0.686665	-0.102667
CREM	cAMP responsive element modulator	-0.693481	-0.0975
PTGS2	prostaglandin-endoperoxide synthase 2	-0.707418	-0.074
AOAH	acyloxyacyl hydrolase	-0.716565	-0.129833
HLA-DQB1	major histocompatibility complex, class II, DQ beta 1	-0.716573	-0.1885
PDK4	pyruvate dehydrogenase kinase 4	-0.721535	-0.124333
AREG	amphiregulin	-0.747853	-0.0778333
CFP	complement factor properdin	-0.757462	-0.0935
DDIT4	DNA damage inducible transcript 4	-0.778156	-0.135833
MS4A7	membrane spanning 4-domains A7	-0.792668	-0.157833
FOSB	FosB proto-oncogene, AP-1 transcription factor subunit	-0.821879	-0.191667
LILRB5	leukocyte immunoglobulin like receptor B5	-0.821988	-0.107167
MPEG1	macrophage expressed 1	-0.853831	-0.183667
CLEC10A	C-type lectin domain containing 10A	-0.876286	-0.162167
MS4A6A	membrane spanning 4-domains A6A	-0.941574	-0.263
FCN1	ficolin 1	-0.947056	-0.141667
IL1B	interleukin 1 beta	-0.952766	-0.136667
SLC40A1	solute carrier family 40 member 1	-0.978201	-0.154667
F13A1	coagulation factor XIII A chain	-1.00874	-0.157333
PHACTR1	phosphatase and actin regulator 1	-1.01151	-0.189167
