# Supplementary material for: Systems level identification of a matrisome-associated macrophage polarisation state in multi-organ fibrosis
Source: eLife. 2023 Sep 14;12:e85530. doi: 10.7554/eLife.85530 (PMC10547479; doi:10.7554/eLife.85530)
Supplement: Figure 5—source data 2. [file elife-85530-fig5-data2.xlsx]

## Sheet: SuppTable10
Figure 5-source data 2. Homeostatic signature regression model
Model
Homeostatic ~ Age + Sex + Smoking
Residuals
Min	1Q	Median	3Q	Max
-1.2047	-0.5816	-0.237	0.2013	3.8187
Coefficients
	Estimate	Standard Error	T-value	P-value
(Intercept)	-1.12761	0.440718	-2.559	0.0127
Age	0.016695	0.008101	2.061	0.043
Sex (Male)	0.385656	0.245096	1.573	0.1201
Smoking (Former)	0.303883	0.316683	0.96	0.3406
Smoking (Never)	0.571422	0.26924	2.122	0.0373
Residual standard error: 0.9796 on 70DF
Multiple R-squared: 0.1584		Adjusted R-squared: 0.1103
F-statistic: 3.293 on 4 and 70 DF		p-value: 0.01567
