# Supplementary material for: Systems level identification of a matrisome-associated macrophage polarisation state in multi-organ fibrosis
Source: eLife. 2023 Sep 14;12:e85530. doi: 10.7554/eLife.85530 (PMC10547479; doi:10.7554/eLife.85530)
Supplement: Figure 5—source data 3. [file elife-85530-fig5-data3.xlsx]

## Sheet: SuppTable10
Figure 5-source data 3. SPP1+MAM- signature regression model
Model
MAM Negative ~ Age + Sex + Smoking
Residuals
Min	1Q	Median	3Q	Max
-1.2275	-0.6501	-0.0704	0.4137	2.9179
Coefficients
	Estimate	Standard Error	T-value	P-value
(Intercept)	-1.04832	0.378734	-2.768	0.00721
Age	0.017636	0.006961	2.533	0.01354
Sex (Male)	0.368652	0.210625	1.75	0.08445
Smoking (Former)	0.102915	0.272144	0.378	0.70645
Smoking (Never)	0.243025	0.231373	1.05	0.29717
Residual standard error: 0.8419 on 70DF
Multiple R-squared: 0.1562		Adjusted R-squared: 0.108
F-statistic: 3.24 on 4 and 70 DF		p-value: 0.01693
