# Supplementary material for: Systems level identification of a matrisome-associated macrophage polarisation state in multi-organ fibrosis
Source: eLife. 2023 Sep 14;12:e85530. doi: 10.7554/eLife.85530 (PMC10547479; doi:10.7554/eLife.85530)
Supplement: Figure 5—source data 4. [file elife-85530-fig5-data4.xlsx]

## Sheet: SuppTable10
Figure 5-source data 4. SPP1+MAM+ signature regression model
Model
MAM Positive ~ Age + Sex + Smoking
Residuals
Min	1Q	Median	3Q	Max
-1.96	-0.3806	0.1378	0.5112	1.3134
Coefficients
	Estimate	Standard Error	T-value	P-value
(Intercept)	0.412447	0.333256	1.238	0.22
Age	-0.010123	0.006125	-1.653	0.103
Sex (Male)	-0.264904	0.185334	-1.429	0.157
Smoking (Former)	-0.036566	0.239465	-0.153	0.879
Smoking (Never)	-0.231613	0.20359	-1.138	0.259
Residual standard error: 0.7408 on 70DF
Multiple R-squared: 0.09886		Adjusted R-squared: 0.04737
F-statistic: 1.92 on 4 and 70 DF		p-value: 0.1167
