# Supplementary material for: Systems level identification of a matrisome-associated macrophage polarisation state in multi-organ fibrosis
Source: eLife. 2023 Sep 14;12:e85530. doi: 10.7554/eLife.85530 (PMC10547479; doi:10.7554/eLife.85530)
Supplement: Figure 5—source data 5. [file elife-85530-fig5-data5.xlsx]

## Sheet: SuppTable10
Figure 5-source data 5. SPP1+MAM+ ECM signature regression model
Model
MAM ECM ~ Age + Sex + Smoking
Residuals
Min	1Q	Median	3Q	Max
-1.0166	-0.2532	0.0012	0.2347	1.3784
Coefficients
	Estimate	Standard Error	T-value	P-value
(Intercept)	-0.11212	0.208569	-0.538	0.593
Age	0.002611	0.003834	0.681	0.498
Sex (Male)	-0.090185	0.115991	-0.778	0.439
Smoking (Former)	0.103968	0.14987	0.694	0.49
Smoking (Never)	-0.207449	0.127417	-1.628	0.108
Residual standard error: 0.4636 on 70DF
Multiple R-squared: 0.08824		Adjusted R-squared: 0.03614
F-statistic: 1.693 on 4 and 70 DF		p-value: 0.1612
