# Supplementary material for: Systems level identification of a matrisome-associated macrophage polarisation state in multi-organ fibrosis
Source: eLife. 2023 Sep 14;12:e85530. doi: 10.7554/eLife.85530 (PMC10547479; doi:10.7554/eLife.85530)
Supplement: Figure 5—source data 6. [file elife-85530-fig5-data6.xlsx]

## Sheet: SuppTable10
Figure 5-source data 6. SPP1+MAM+ Metabolic signature regression model
Model
MAM Metabolic ~ Age + Sex + Smoking
Residuals
Min	1Q	Median	3Q	Max
-1.7004	-0.4389	0.1545	0.5213	1.33
Coefficients
	Estimate	Standard Error	T-value	P-value
(Intercept)	0.126506	0.329374	0.384	0.702
Age	-0.009803	0.006054	-1.619	0.11
Sex (Male)	-0.169659	0.183175	-0.926	0.358
Smoking (Former)	0.14759	0.236676	0.624	0.535
Smoking (Never)	-0.001684	0.201218	-0.008	0.993
Residual standard error: 0.7321 on 70DF
Multiple R-squared: 0.06506		Adjusted R-squared: 0.01164
F-statistic: 1.218 on 4 and 70 DF		p-value: 0.3111
