# Supplementary figures and images for: Systems level identification of a matrisome-associated macrophage polarisation state in multi-organ fibrosis
Source: eLife journal article supplement (doi:10.7554/elife.85530), 2023-09-14

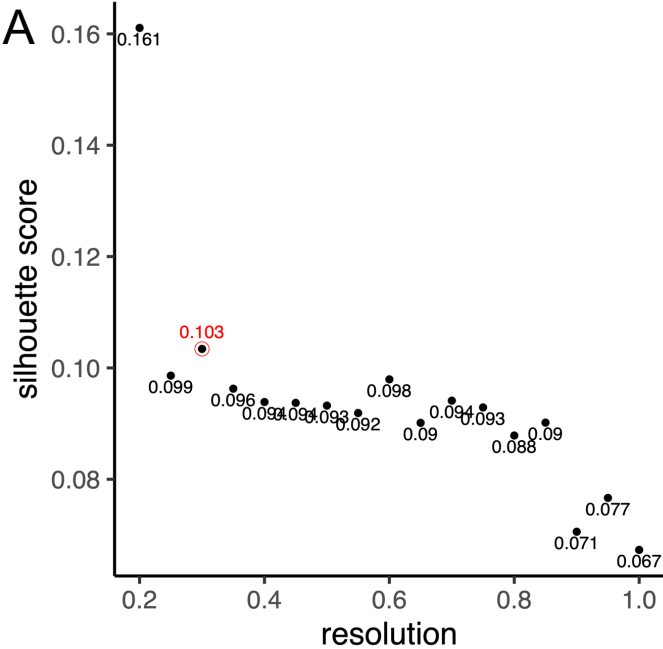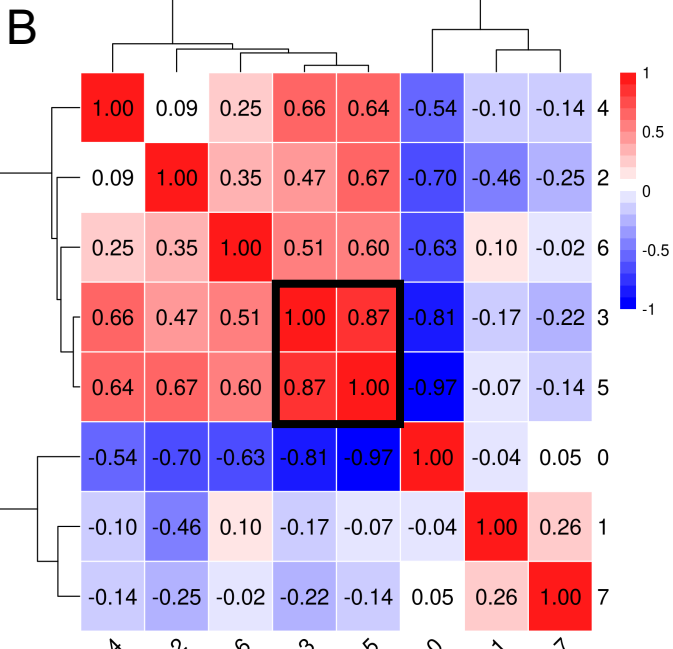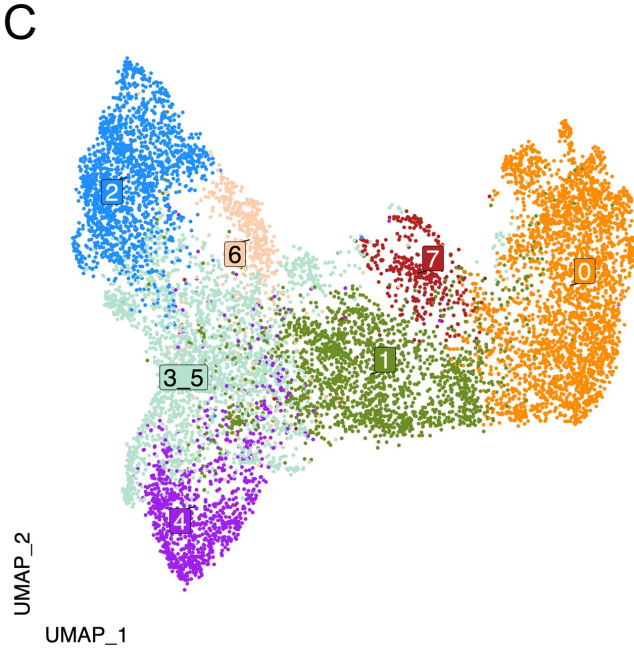

**Cluster relabelling**  
2 → FCN1+  
4 → LST1+  
0 → LYVE1+MARCO+  
1 → RNASE1+  
7 → SPP1+

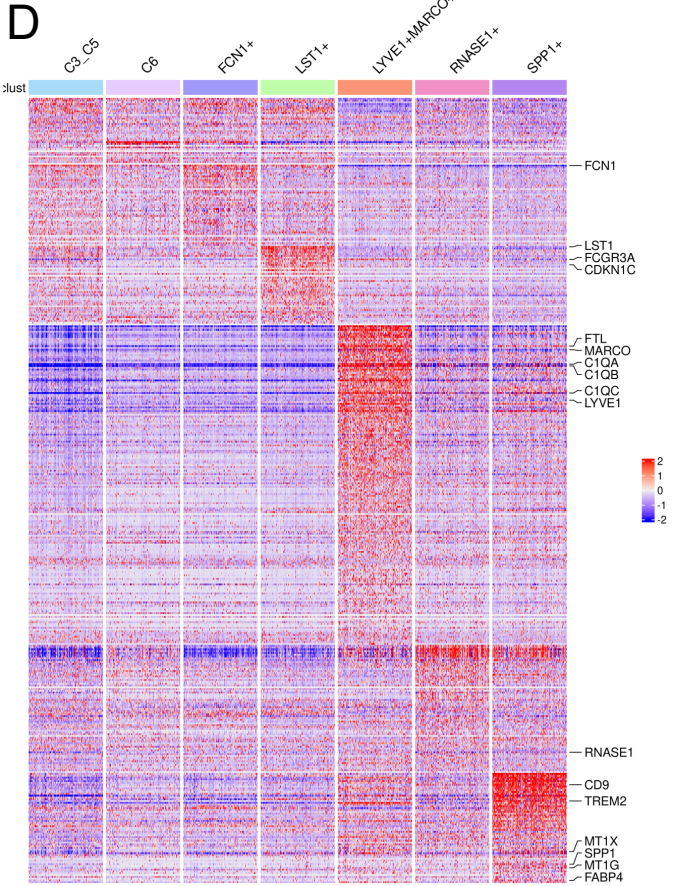

Supplement: supp [file elife_poa_e85530_Figure_1_figure_supplement_1.pdf › elife_poa_e85530_Figure_1_figure_supplement_1.pdf]

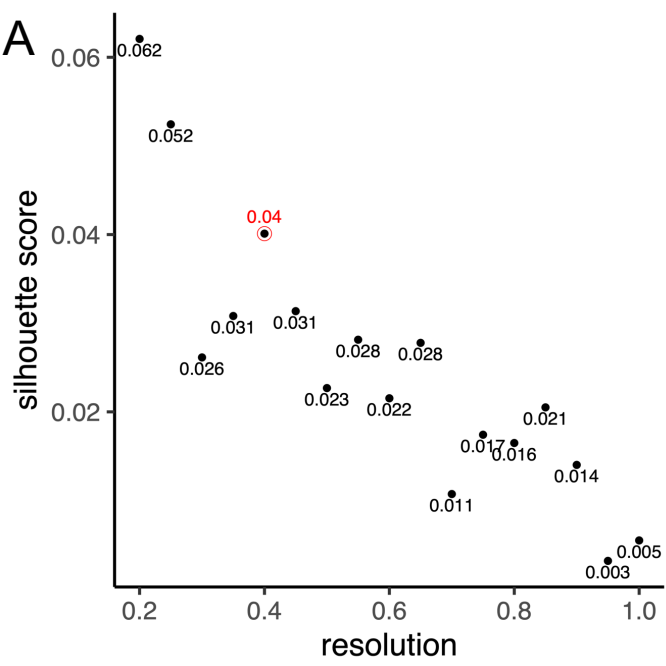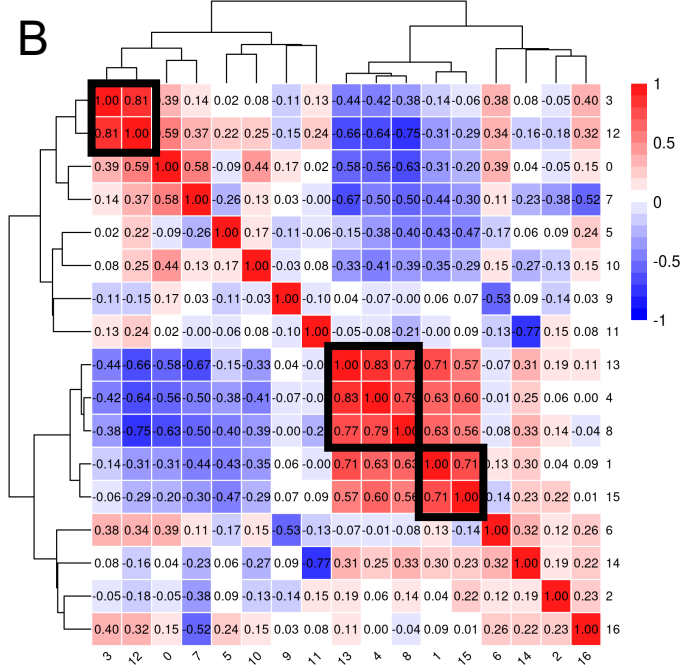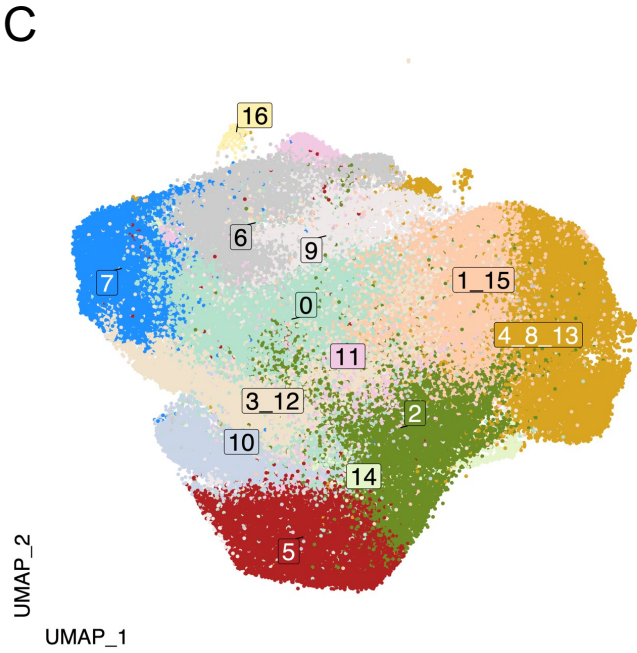

**Cluster relabelling**

4\_8\_13 → FABP4+

7 → FCN1+

2 → RNASE1+

5 → SPP1+RNASE1+

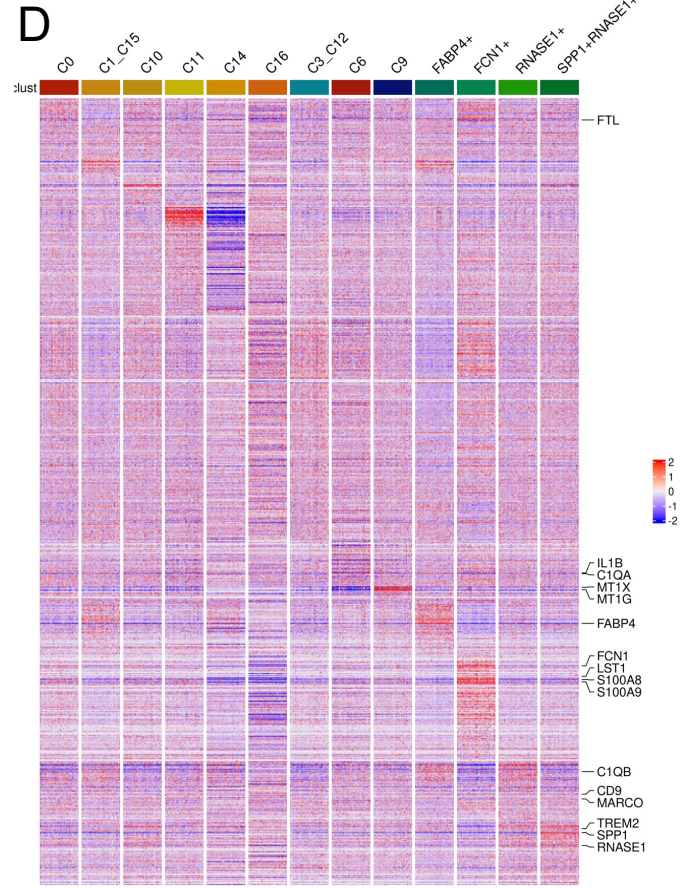

Supplement: supp [file elife_poa_e85530_Figure_1_figure_supplement_2.pdf › elife_poa_e85530_Figure_1_figure_supplement_2.pdf]

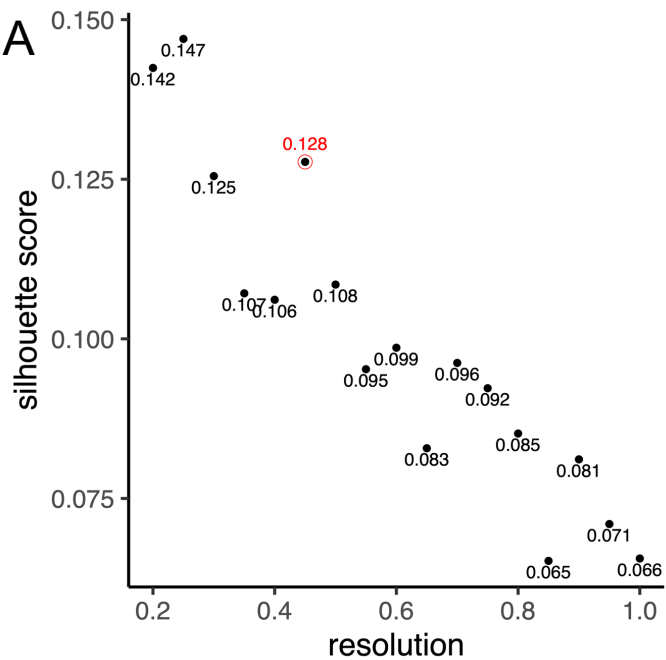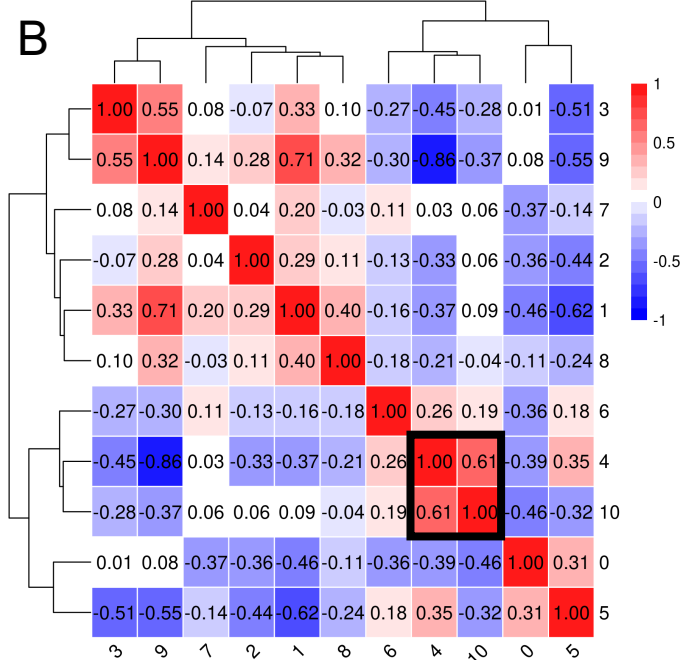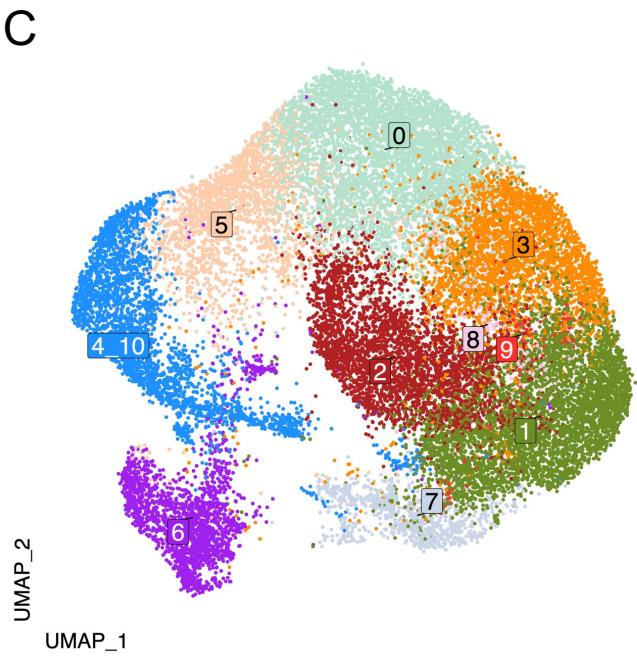

**Cluster relabelling**

4\_10 → FCN1+      1 → RNASE1+  
6 → FCN1+LST1+      2 → SPP1+  
3 → LYVE1+      9 → SPP1+RNASE1+

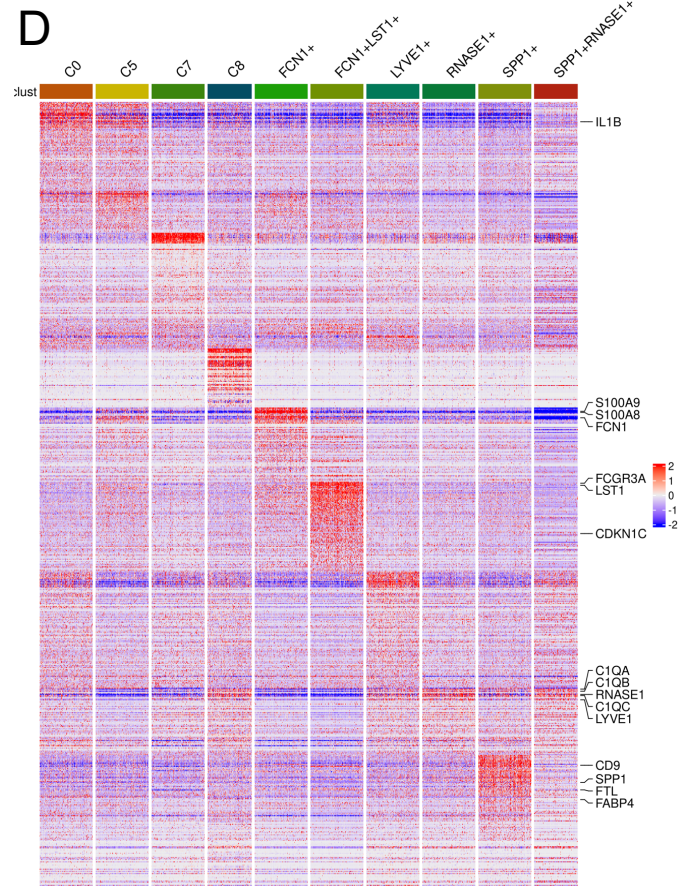

Supplement: supp [file elife_poa_e85530_Figure_1_figure_supplement_3.pdf › elife_poa_e85530_Figure_1_figure_supplement_3.pdf]

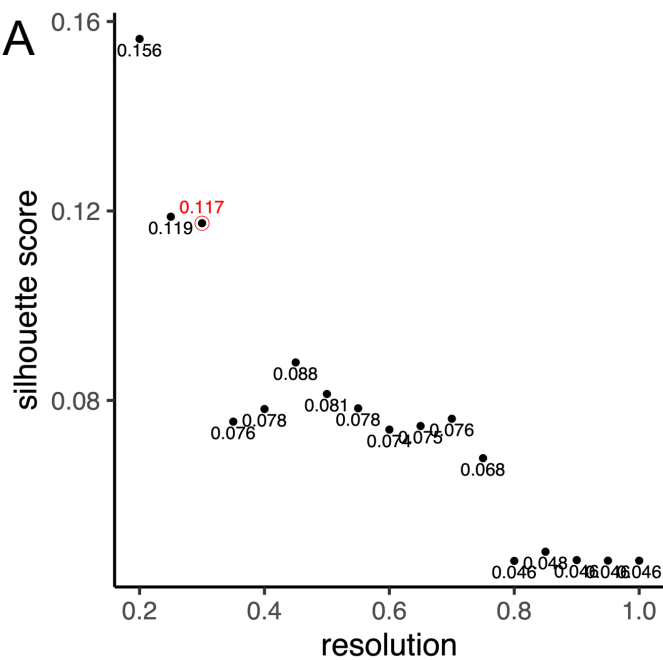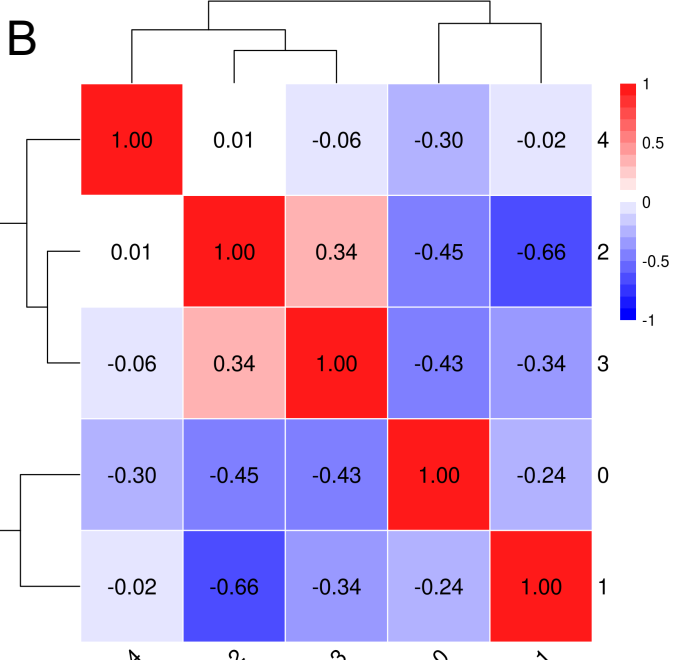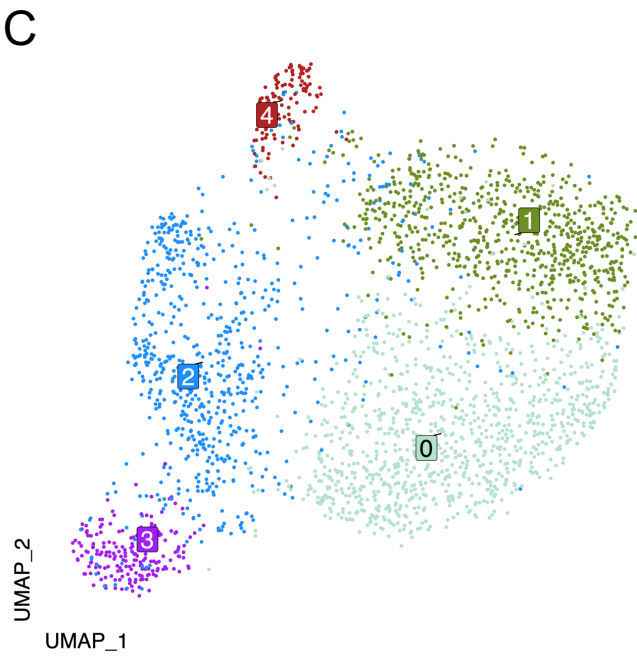

**Cluster relabelling**

2 → FCN1+

3 → LST1+

1 → RNASE1+LYVE1+

4 → SPP1+

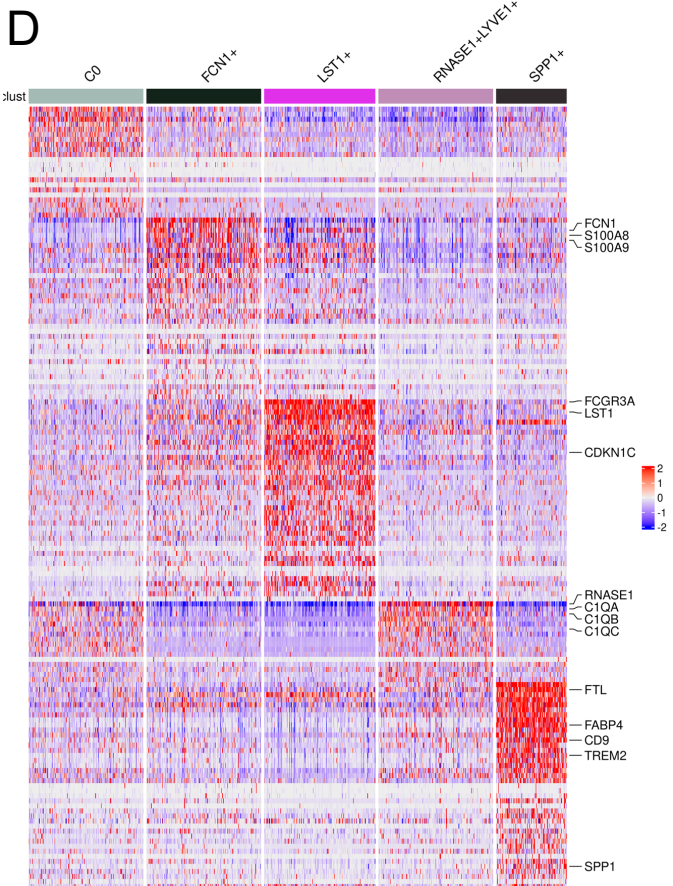

Supplement: supp [file elife_poa_e85530_Figure_1_figure_supplement_4.pdf › elife_poa_e85530_Figure_1_figure_supplement_4.pdf]

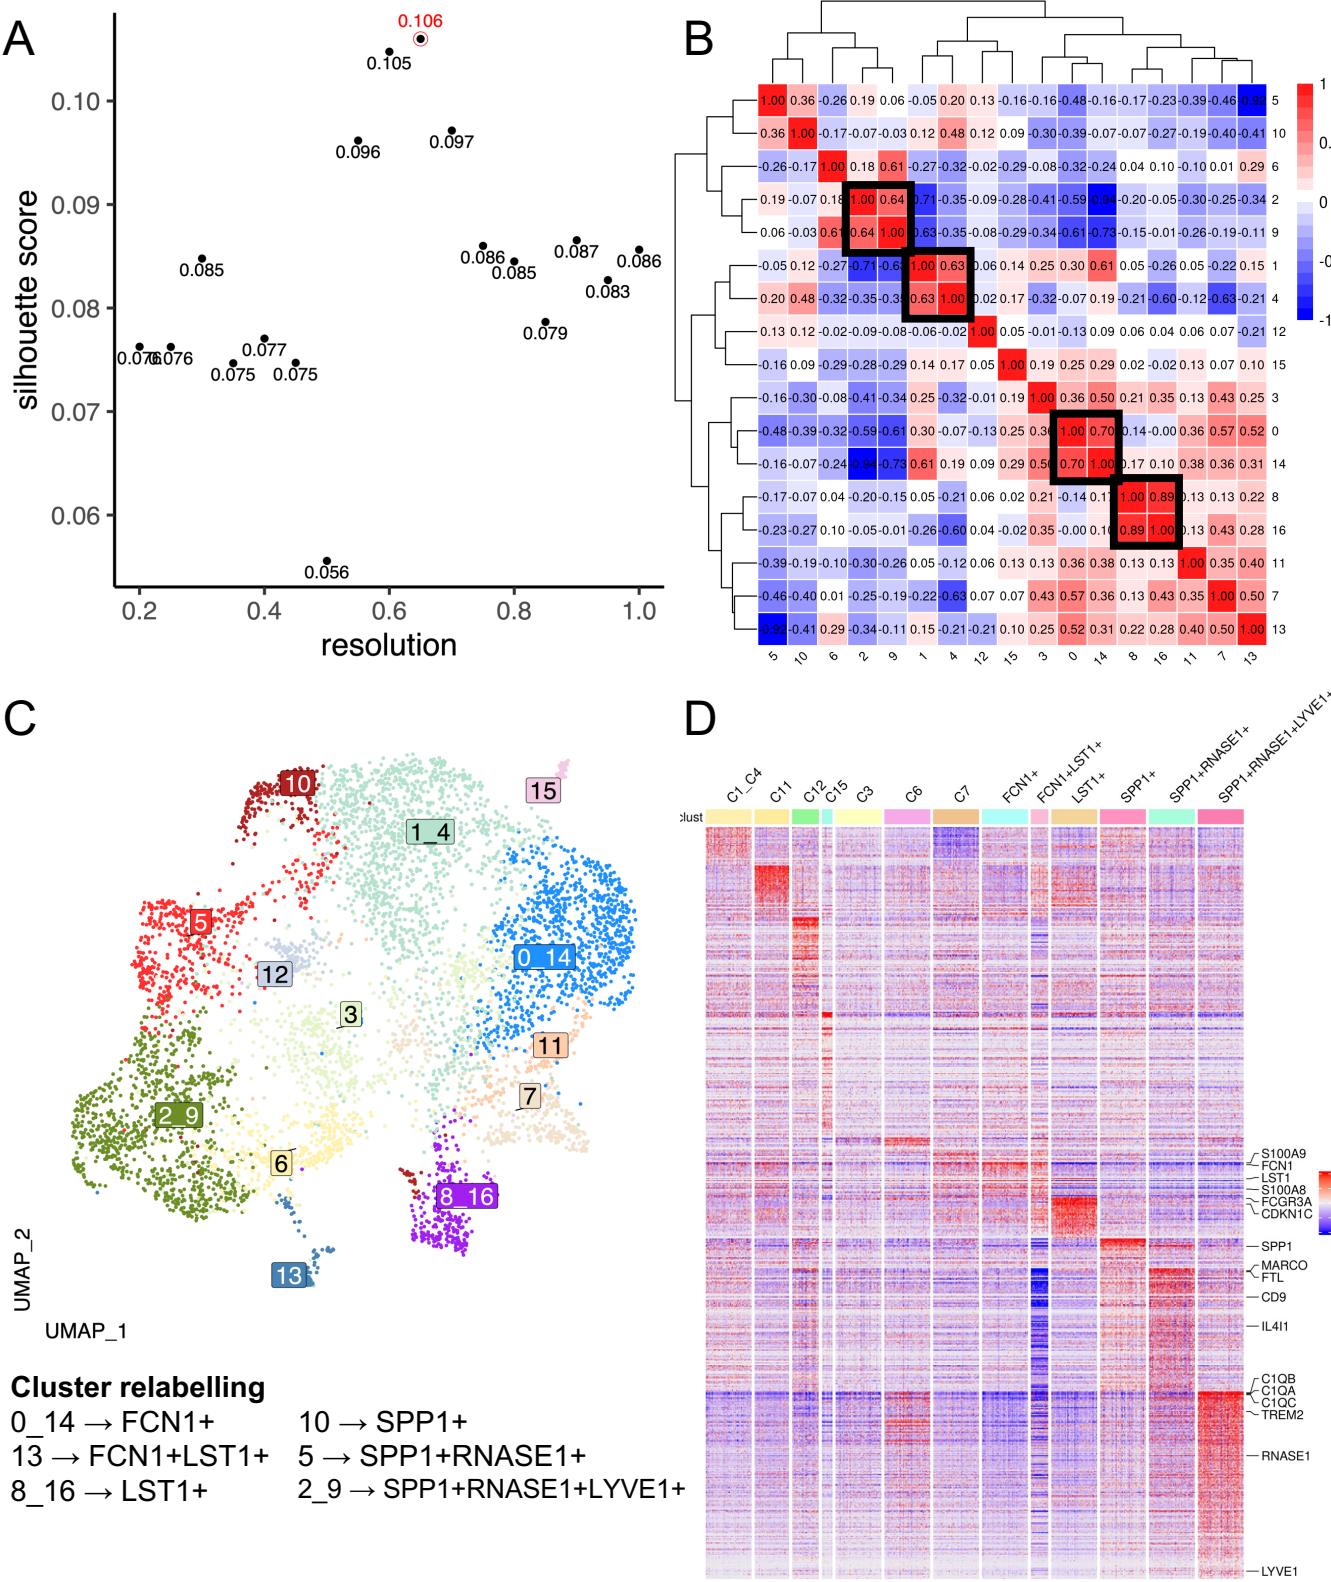

Supplement: supp [file elife_poa_e85530_Figure_1_figure_supplement_5.pdf › elife_poa_e85530_Figure_1_figure_supplement_5.pdf]

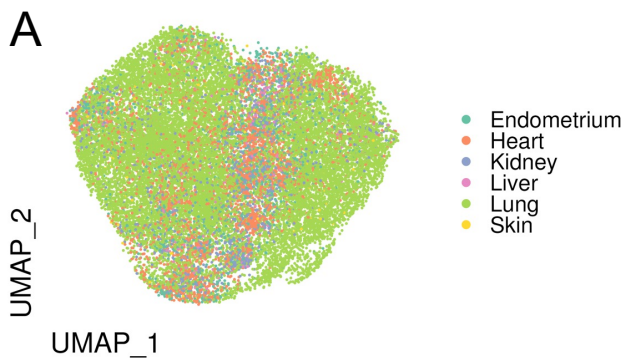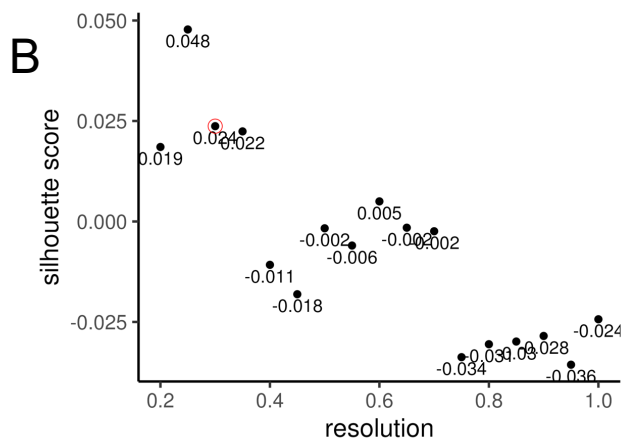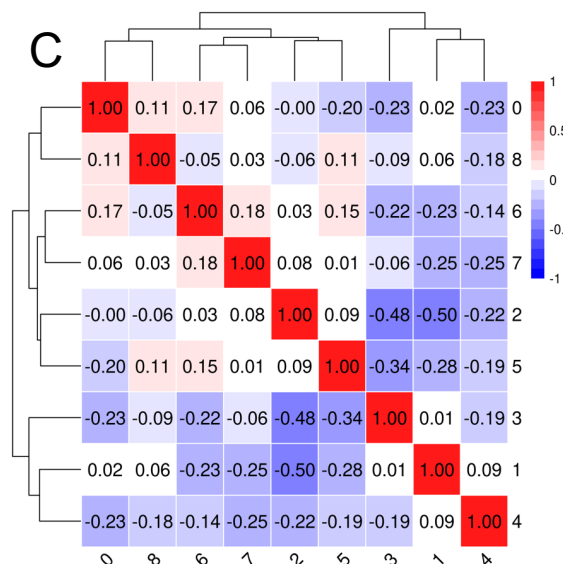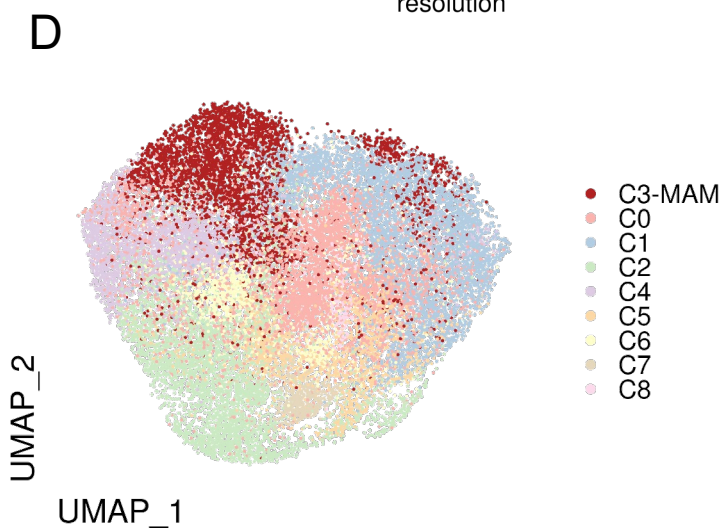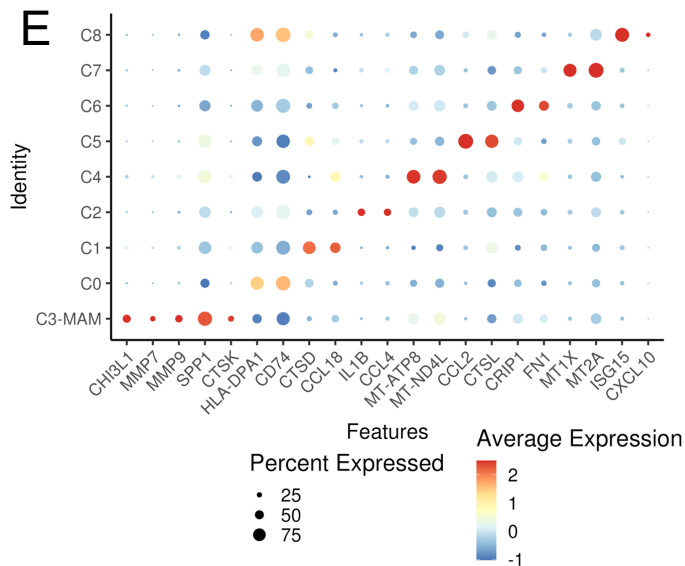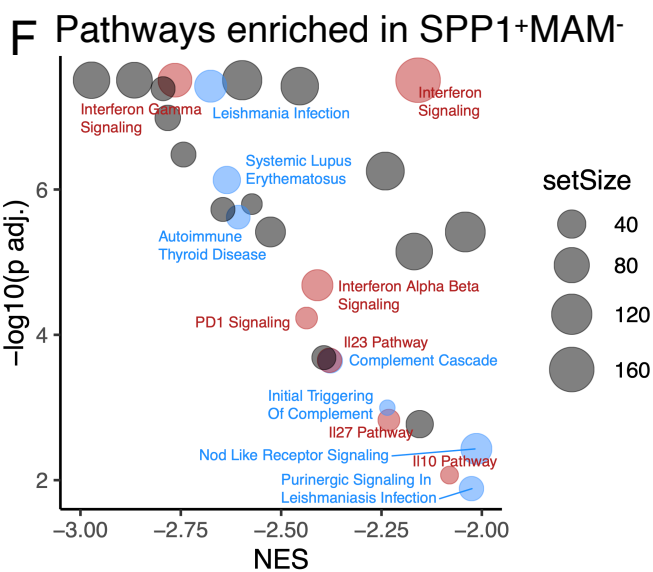

Supplement: supp [file elife_poa_e85530_Figure_2_figure_supplement_1.pdf › elife_poa_e85530_Figure_2_figure_supplement_1.pdf]

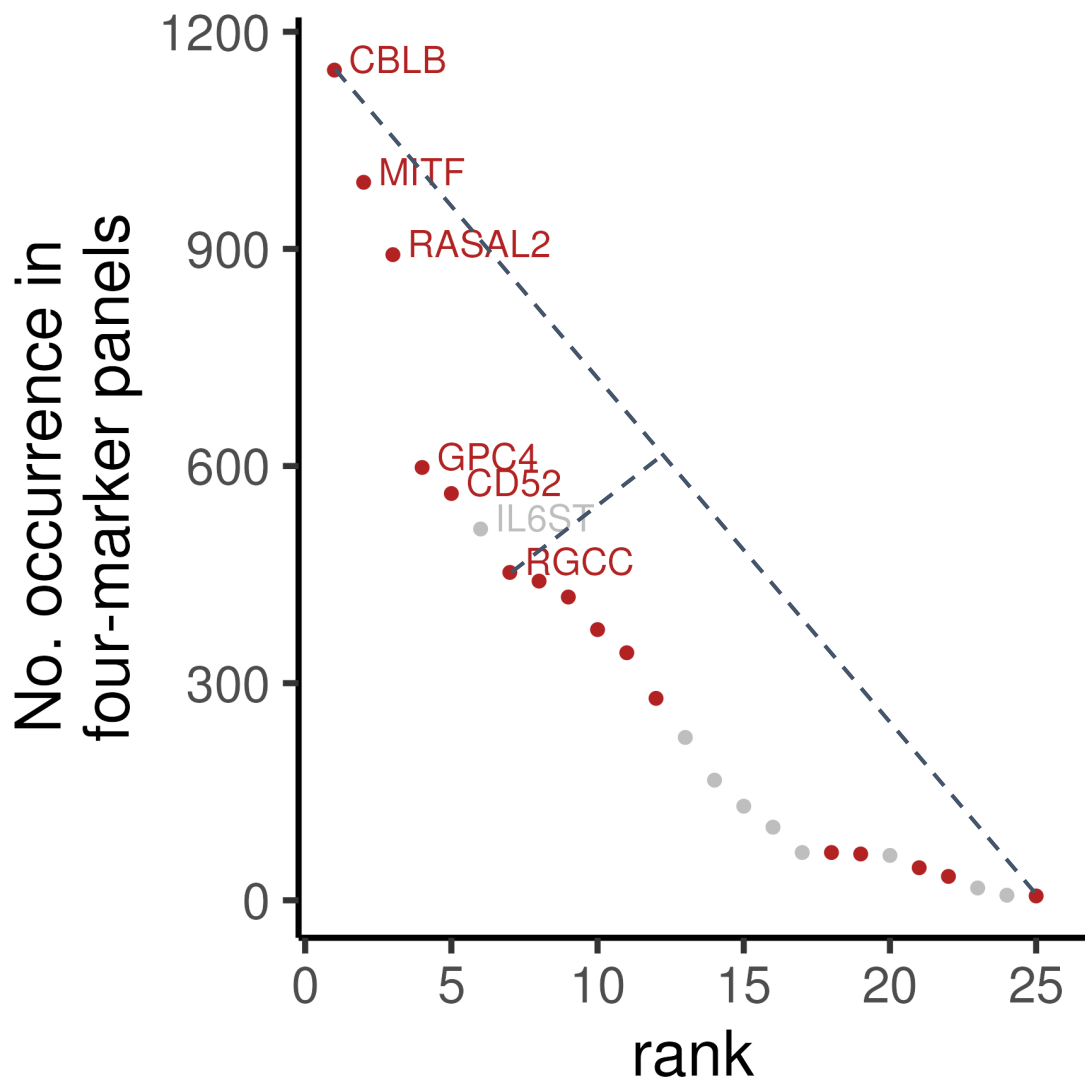

Supplement: supp [file elife_poa_e85530_Figure_2_figure_supplement_2.pdf › elife_poa_e85530_Figure_2_figure_supplement_2.pdf]

A

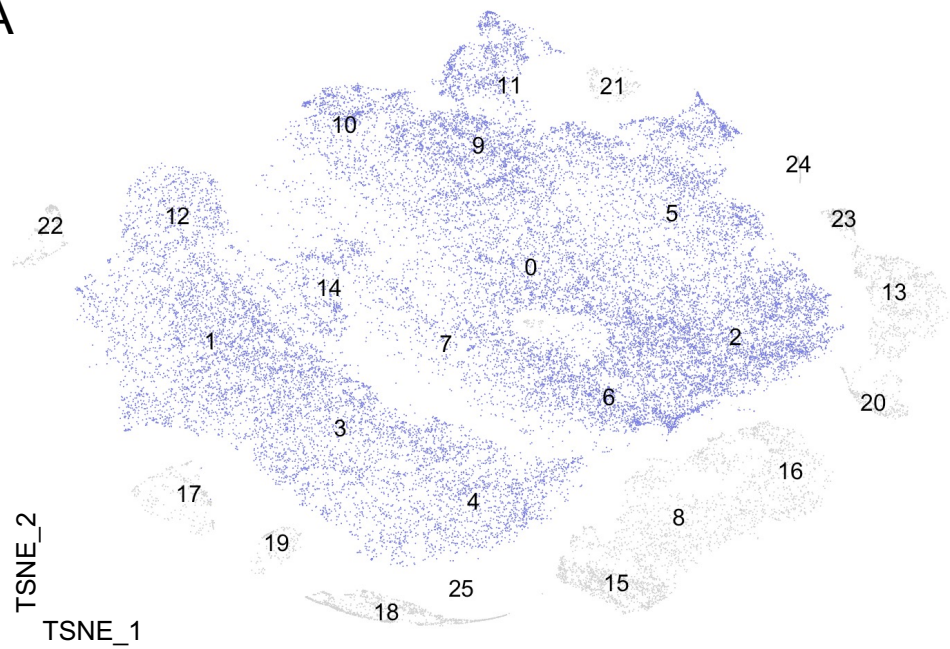

B

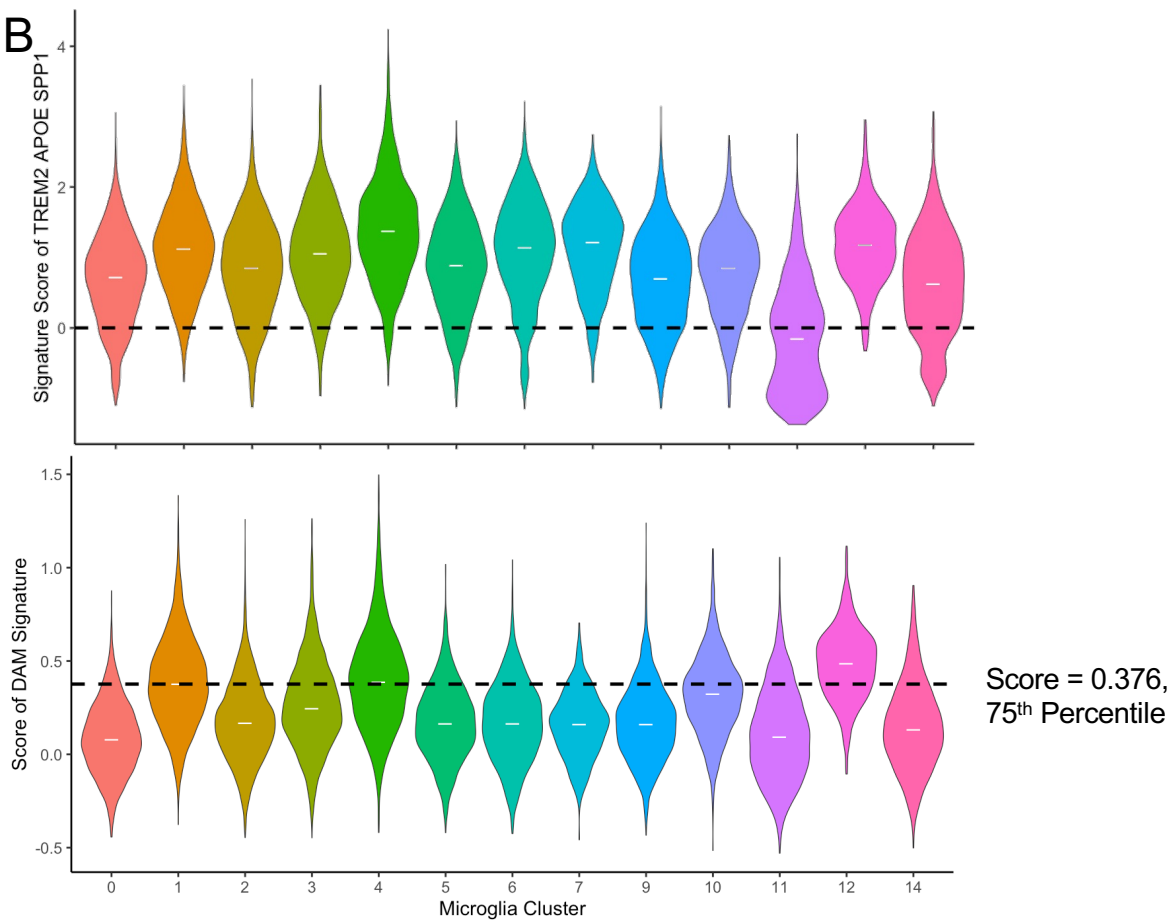

Supplement: supp [file elife_poa_e85530_Figure_2_figure_supplement_3.pdf › elife_poa_e85530_Figure_2_figure_supplement_3.pdf]

**A** SAM Signature (SPP1/TREM2/CD9)

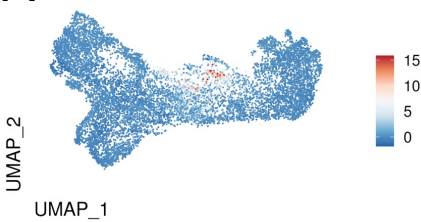

**B** SAM cells

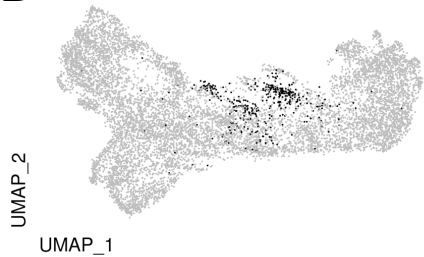

MAM cells

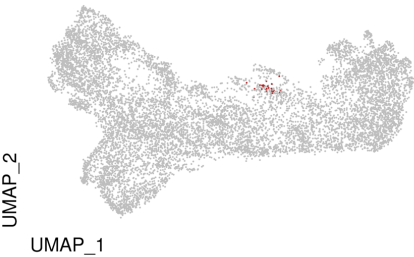

**C**

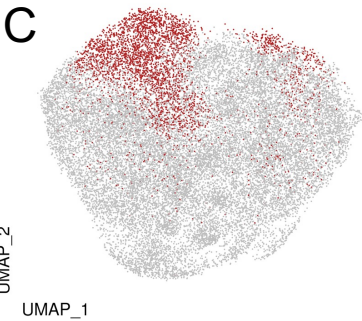

**D**

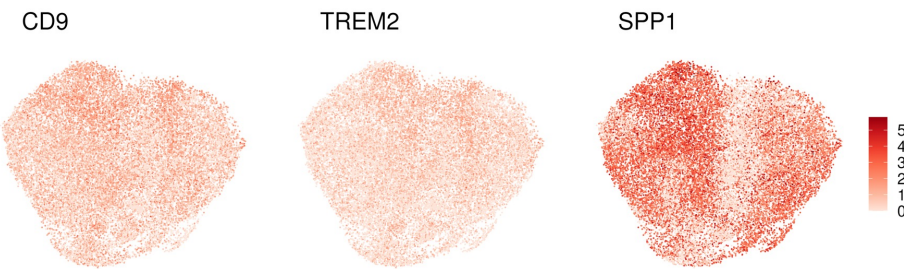

Supplement: supp [file elife_poa_e85530_Figure_2_figure_supplement_4.pdf › elife_poa_e85530_Figure_2_figure_supplement_4.pdf]

Liver

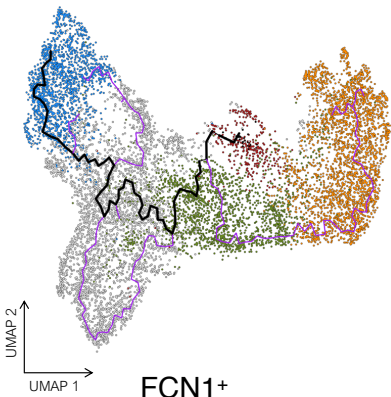

Lung

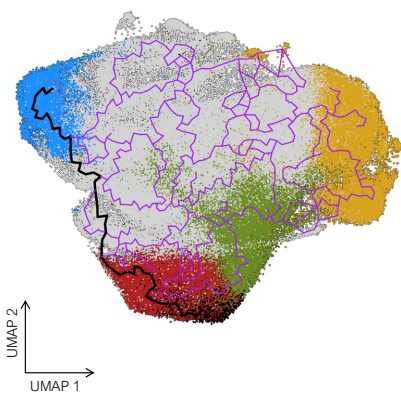

Heart

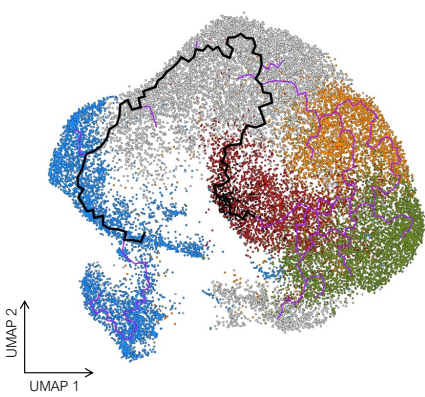

Skin

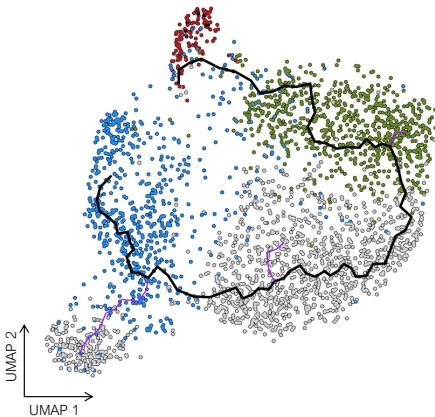

Endometrium

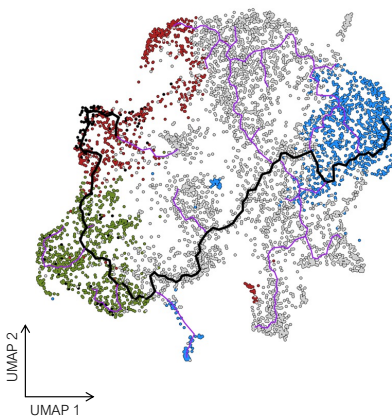

Kidney

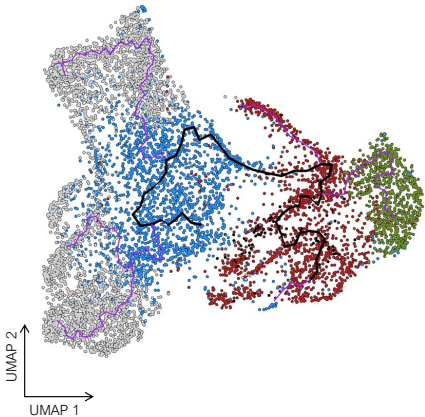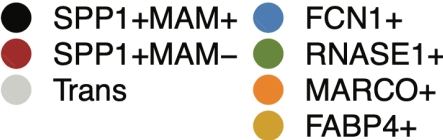

Supplement: supp [file elife_poa_e85530_Figure_3_figure_supplement_1.pdf › elife_poa_e85530_Figure_3_figure_supplement_1.pdf]

### Homeostatic Signature stratified by smoking status

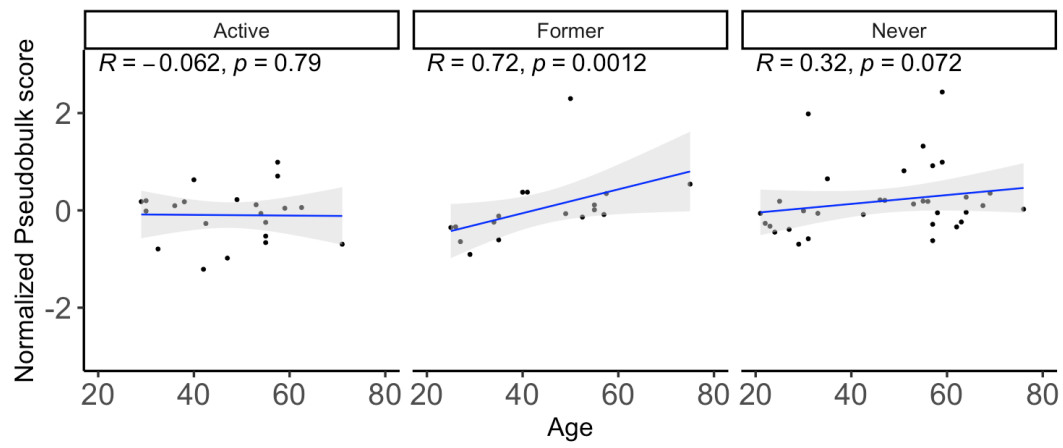

Supplement: supp [file elife_poa_e85530_Figure_5_figure_supplement_1.pdf › elife_poa_e85530_Figure_5_figure_supplement_1.pdf]

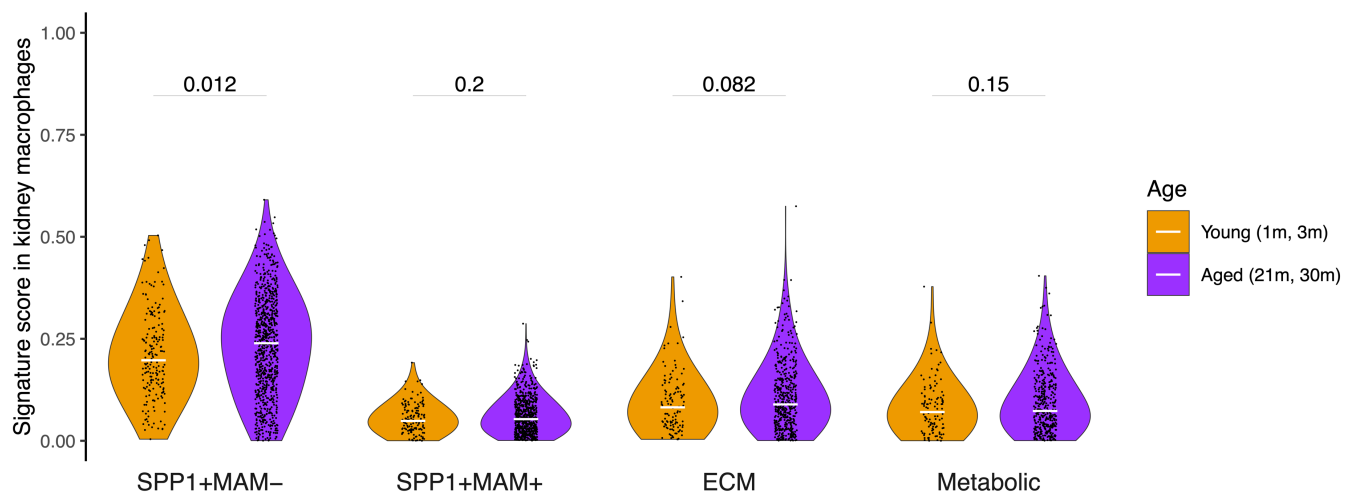

Supplement: supp [file elife_poa_e85530_Figure_5_figure_supplement_2.pdf › elife_poa_e85530_Figure_5_figure_supplement_2.pdf]
